# Supplementary material for: Identification of Isomeric N‐Glycans by Conformer Distribution Fingerprinting using Ion Mobility Mass Spectrometry
Source: PubMed Central journal article supplement — Chemistry. 2021 Jan 14;27(6):2149–54. doi: 10.1002/chem.202004522 (PMC7898647; doi:10.1002/chem.202004522), 2021-01-14
Supplement: CHEM-27-2149-s001.pdf [file CHEM-27-2149-s001.pdf]

# Chemistry–A European Journal

Supporting Information

## Identification of Isomeric *N*-Glycans by Conformer Distribution Fingerprinting using Ion Mobility Mass Spectrometry

Javier Sastre Toraño<sup>+, [a]</sup> Oier Aizpurua-Olaizola<sup>+, [a, e]</sup> Na Wei,<sup>[b]</sup> Tiehai Li,<sup>[b]</sup> Luca Unione,<sup>[a]</sup> Gonzalo Jiménez-Osés,<sup>[c]</sup> Francisco Corzana,<sup>[d]</sup> Victor J. Somovilla,<sup>[a]</sup> Juan M. Falcon-Perez,<sup>[e]</sup> and Geert-Jan Boons<sup>\*[a, b]</sup>

## Contents

|                                                                                                            |     |
|------------------------------------------------------------------------------------------------------------|-----|
| 1. Experimental Procedures .....                                                                           | 3   |
| 1.1 Chemicals and reagents.....                                                                            | 3   |
| 1.2 Enzymatic synthesis of complex <i>N</i> -glycan standards .....                                        | 3   |
| 1.3 General protocols for enzymatic reactions .....                                                        | 5   |
| 1.4 NMR characterization data .....                                                                        | 8   |
| 1.5 NMR spectra .....                                                                                      | 23  |
| 1.4 N-glycan release, 2-AA labelling and purification .....                                                | 52  |
| 1.5 HILIC-IMS-QTOF analysis of glycans .....                                                               | 53  |
| 1.6 Data treatment.....                                                                                    | 53  |
| 2. Results and Discussion .....                                                                            | 55  |
| 2.1 Arrival time distributions of standards as [M-H] <sup>-</sup> and [M-2H] <sup>2-</sup> ions.....       | 55  |
| 2.2 ATDs of standards obtained with different trapping RF values .....                                     | 63  |
| 2.3 ATDs of standards at different concentrations .....                                                    | 82  |
| 2.4 Effect of solvent composition (ACN:water ratio) on gas phase conformation of unlabeled standards ..... | 100 |
| 2.5 ATDs of HILIC-separated anomers of standards .....                                                     | 101 |
| 2.6 HILIC-IMS-MS of fetuin released glycans .....                                                          | 110 |
| 2.7 ATD simulations .....                                                                                  | 126 |
| References.....                                                                                            | 143 |
| Author Contributions .....                                                                                 | 143 |

## 1. Experimental Procedures

### 1.1 Chemicals and reagents

Fetuin from bovine serum, MS-grade formic acid, MS-grade acetic acid, dimethyl sulfoxide (DMSO), 2-aminoanthrallic acid (2-AA), and sodium cyanoborohydride were purchased from Sigma Aldrich (Hamburg, Germany). MS-grade acetonitrile (ACN) was acquired from Biosolve (Dieuz, France), trifluoro acetic acid (TFA) from Argos Organics (Geel, Belgium) and PNGase F from *E. coli* was acquired from Roche (Basel, Switzerland). Reaction buffers of 1% NP-40, denaturation buffer (0.5% SDS, 40 mM dithiothreitol (DTT) and glycobuffer (50 mM sodium phosphate) were purchased from New England BioLabs (Ipswich, US). Ammonium formate was obtained from Fluka (Seelze, Germany), C<sub>18</sub> SPE Sep-Pak® Vac (1cc) columns from Waters Corporation (Milford, US), PGC SPE Hypercarb Hypersep (1cc) columns from Thermo Scientific (Rockwood, USA) and PD Minitrap G-10 cartridges from GE Healthcare (Uppsala, Sweden). Ultra-pure water was obtained from a MerckMillipore Synergy® water purification system (Burlington, US).

### 1.2 Enzymatic synthesis of complex *N*-glycan standards

The well-defined *N*-glycans **1-15** were prepared by an enzymatic approach (scheme S1). Starting from a sialoglycopeptide (SGP) isolated from the egg yolk powder,<sup>[1]</sup> removal of the peptide using PNGase F afforded glycan **10**. Treatment of **10** by neuraminidase to cleave the terminal sialic acids provided glycan **6**. Subsequently, removal of two galactoses of **6** by treatment with galactosidase from *A. niger* gave glycan **1**. Core fucosylation of **1** using recombinant FUT8 and guanosine 5' -diphospho- $\beta$ -L-fucose (GDP-Fuc) in presence of calf intestine alkaline phosphatase (CIAP) afforded glycan **2**, and treatment of **2** with B4GalT1 and uridine 5' -diphosphogalactose (UDP-Gal) afforded **7** (scheme S1A). With compound **6** in hand, two strategies for the selective modification of bottom antenna due to inherent branch selectivity of glycosyltransferase and glycosidase were used to prepare asymmetric glycans **8** and **3** (scheme S1B). Selective  $\alpha$ 2,6-sialylation of **6** at the bottom antenna based on a high preference of ST6Gal1<sup>[2]</sup> in presence of cytidine-5' -monophospho-*N*-acetylneuraminic acid (CMP-Neu5Ac, 1.0 eq) and CIAP afforded an asymmetric *N*-glycan **8**. And selective removal of the galactose at bottom antenna of **6** was achieved using a galactosidase from *E. coli*<sup>[3]</sup> provide asymmetrical glycan **3**. In addition,  $\alpha$ 2,3-sialylation of terminal two galactoses of **6** using ST3Gal4 in presence of CMP-Neu5Ac and CIAP afforded glycan **11**. Based on the same strategies, core fucosylated *N*-glycans **4**, **9** and **14** were also prepared smoothly (scheme S1C). In addition, treatment of **7** using ST6Gal1 in presence of excess CMP-Neu5Ac (2.5 eq) and CIAP installed two  $\alpha$ 2,6-Neu5Ac at terminal Gal to afford **15** (scheme S1D).

**Scheme S1.** Enzymatic synthesis of N-glycan standards

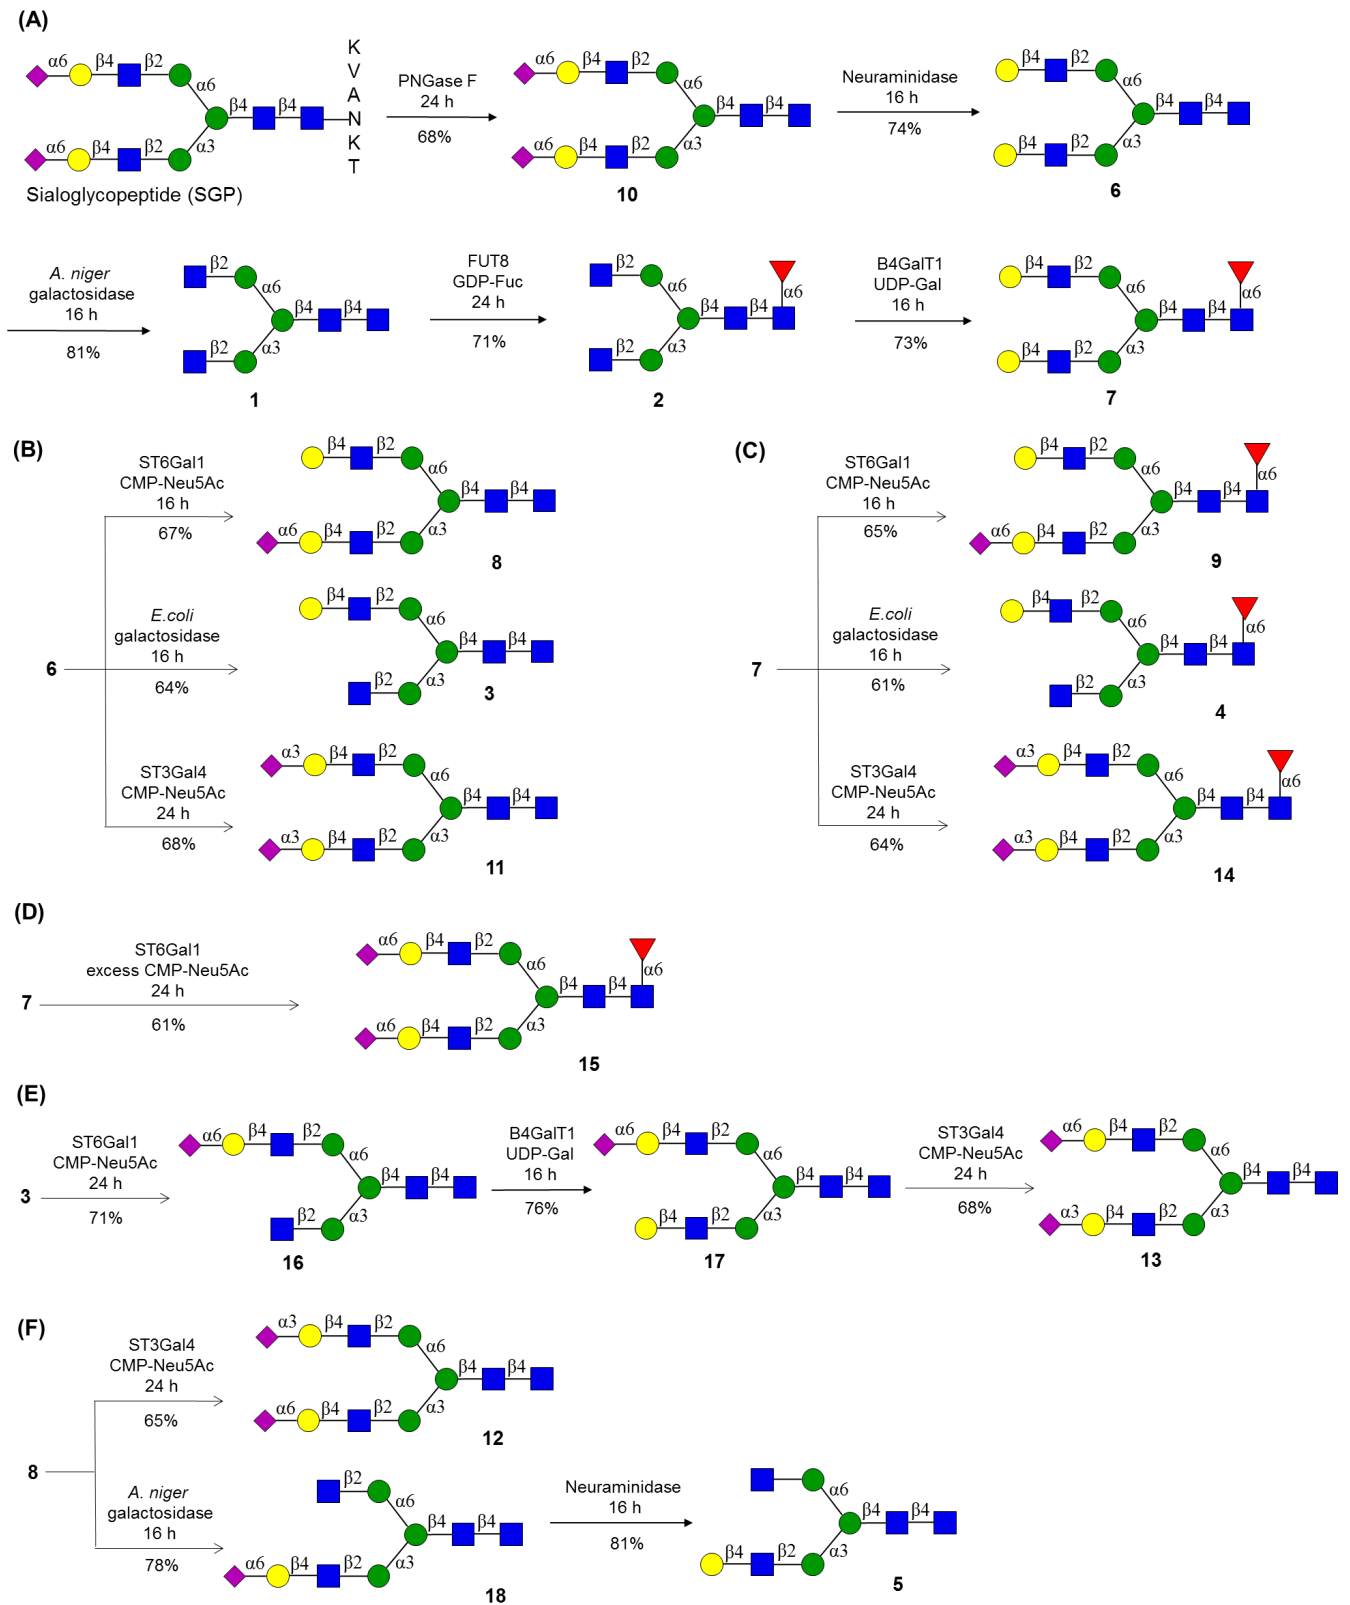

---

Asymmetric glycan **3** was characterized with terminal GlcNAc and LacNAc moiety at bottom antenna and upper antennae, respectively. Many glycosyltransferases modify LacNAc but not terminal GlcNAc moieties, thus  $\alpha$ 2,6-sialylation of **3** at upper antennae using ST6Gal1 in presence of CMP-Neu5Ac and CIAP afforded glycan **16**. Due to  $\alpha$ 2,6-sialoside blocking further modification by mammalian glycosyl transferases, installation of galactose using B4GalT1 and UDP-Gal in the presence of MnCl<sub>2</sub> and CIAP gave glycan **17** with the resulting LacNAc moiety at bottom antennae, which was further  $\alpha$ 2,3-sialylated by ST3Gal4 in presence of CMP-Neu5Ac and CIAP to afford asymmetric glycan **13** (scheme S1E).

Next, another di-sialylated isomer **12** was also prepared by treatment of **8** using ST3Gal4 in presence of CMP-Neu5Ac and CIAP. In addition, treatment of **8** with galactosidase from *A. niger* cleaved galactose at upper antenna provided glycan **18**, which was further modified by neuraminidase to afford glycan **5** (scheme S1F). It is important to note that all synthesized *N*-glycans were purified by HPLC using a HILIC column (XBrigde<sup>®</sup> Amide 5  $\mu$ m, 10 mm x 250 mm, Waters).

### 1.3 General protocols for enzymatic reactions

#### General procedure for removal of peptide of SGP using PNGase F

To a sialoglycopeptide (SGP) substrate (5-10 mM) in a PBS buffer solution (50 mM, pH 7.4) containing BSA (1% volume total) was added PNGase F (1% wt/wt relative to acceptor substrate), and the mixture was incubated for 24 h at 37°C. Reaction progress was monitored by ESI-MS, if starting material remained after 24 h, another portion of PNGase F was added until no starting material could be detected. The reaction mixture was centrifuged, and the resulting supernatant was loaded on Bio-Gel P4 column (eluent: 0.1 M NH<sub>4</sub>HCO<sub>3</sub>). Product containing fractions were combined and lyophilized for further purification by HPLC.

#### General procedure for removal of terminal Neu5Ac using neuraminidase

To a solution of *N*-glycan (5-10 mM) in sodium acetate buffer solution (50 mM, pH 5.5) containing CaCl<sub>2</sub> (5 mM) was added  $\alpha$ 2-3,6,8,9 neuraminidase A (1 U/ $\mu$ L, P0722L, NEW ENGLAND BioLabs<sup>®</sup> Inc.), and the mixture was incubated at 37 °C for 16 h. Reaction progress was monitored by ESI-MS, if starting material remained after 16 h, another portion of neuraminidase was added until no starting material could be detected. Once the reaction finished, the neuraminidase was inactivated at 65 °C for 10 min. The reaction mixture was centrifuged, and the resulting supernatant was loaded on Bio-Gel P4 column (eluent: 0.1 NH<sub>4</sub>HCO<sub>3</sub>). Product containing fractions were combined and lyophilized for further purification by HPLC.

#### General procedure for removal of terminal Gal using galactosidase from *A. niger*

To a solution of *N*-glycan (5-10 mM) in sodium acetate buffer solution (50 mM, pH 4.5) containing BSA (1% volume total) was added  $\beta$ -galactosidase (0.5 U/ $\mu$ L) from *Aspergillus niger* (Megazyme # E-BGLAN), and the mixture was incubated at 37 °C for 16 h. Reaction progress was monitored by ESI-MS, if starting material remained after 16 h, another portion of  $\beta$ -galactosidase was added until no starting material could be detected. Once the reaction finished, the  $\beta$ -galactosidase was inactivated at 65 °C for 10 min. The reaction mixture was centrifuged,

---

and the resulting supernatant was loaded on Bio-Gel P4 column (eluent: 0.1 NH<sub>4</sub>HCO<sub>3</sub>). Product containing fractions were combined and lyophilized for further purification by HPLC.

#### **General procedure for the selective cleavage of Gal using *E. coli* $\beta$ -galactosidase**

To a solution of *N*-glycan (5-10 mM) in a Tris buffer solution (50 mM, pH 7.3) containing MgCl<sub>2</sub> (5 mM) was added *E. coli*  $\beta$ -galactosidase (0.3 U/ $\mu$ L, Sigma-Aldrich, G4155), and the mixture was incubated for 16 h at 37°C. Once the reaction finished, the  $\beta$ -galactosidase was inactivated at 65°C for 10 min. The reaction mixture was centrifuged, and the resulting supernatant was loaded on Bio-Gel P4 column (eluent: 0.1 NH<sub>4</sub>HCO<sub>3</sub>). Product containing fractions were combined and lyophilized for further purification by HPLC.

#### **General procedure for the installation of $\alpha$ 1,6 Fuc using FUT8**

To a solution of *N*-glycan acceptor (5-10 mM) and GDP-Fuc (1.5 eq) in MES buffer solution (100 mM, pH 7.0) containing MnCl<sub>2</sub> (10 mM) and BSA (1% volume total) was added FUT8 (1% *wt/wt* relative to acceptor substrate) and CIAP (1% volume total), and the mixture was incubated at 37 °C for 24 h. Reaction progress was monitored by ESI-MS, if starting material remained after 24 h, another portion of FUT8 was added until no starting material could be detected. The reaction mixture was centrifuged, and the resulting supernatant was loaded on Bio-Gel P4 column (eluent: 0.1 NH<sub>4</sub>HCO<sub>3</sub>). Product containing fractions were combined and lyophilized for further purification by HPLC.

#### **General procedure for the installation of $\beta$ 1,4 Gal using B4GalT1**

To a solution of *N*-glycan acceptor (5-10 mM) and UDP-Gal (1.2 eq per Gal) in Tris buffer solution (100 mM, pH 7.5) containing MnCl<sub>2</sub> (10 mM) and BSA (1% volume total) was added B4GalT1 (1% *wt/wt* relative to acceptor substrate) and CIAP (1% volume total), and the mixture was incubated at 37 °C for 16 h. Reaction progress was monitored by ESI-MS, if starting material remained after 16 h, another portion of FUT8 was added until no starting material could be detected. The reaction mixture was centrifuged, and the resulting supernatant was loaded on Bio-Gel P4 column (eluent: 0.1 NH<sub>4</sub>HCO<sub>3</sub>). Product containing fractions were combined and lyophilized for further purification by HPLC.

#### **General procedure for the selective installation of $\alpha$ 2,6 Neu5Ac using ST6Gal1**

To a solution of *N*-glycan acceptor (5-10 mM) and CMP-Neu5Ac (1.1 eq) in a sodium cacodylate buffer solution (50 mM, pH 7.2) containing BSA (1% total volume) was added ST6Gal1 (1% *wt/wt* relative to acceptor substrate) and CIAP (1% volume total), and the reaction mixture was incubated at 37 °C for 16 h. The mixture was centrifuged, and the resulting supernatant was loaded on Bio-Gel P4 column (eluent: 0.1 NH<sub>4</sub>HCO<sub>3</sub>). Product containing fractions were combined and lyophilized for further purification by HPLC.

#### **General Procedure for the installation of $\alpha$ 2,3 Neu5Ac using ST3Gal4**

---

To a solution of *N*-glycan acceptor (5-10 mM) and CMP-Neu5Ac (1.5 eq per Neu5Ac) in a sodium cacodylate buffer solution (50 mM, pH 7.2) containing BSA (1% total volume) was added ST3Gal4 (2% *wt/wt* relative to acceptor substrate) and CIAP (1% volume total), and the reaction mixture was incubated at 37 °C for 24 h. Reaction progress was monitored by ESI-MS, if starting material remained after 24 h, another portion of ST3Gal4 was added until no starting material could be detected. The reaction mixture was centrifuged, and the resulting supernatant was loaded on Bio-Gel P4 column (eluent: 0.1 NH<sub>4</sub>HCO<sub>3</sub>). Product containing fractions were combined and lyophilized for further purification by HPLC.

#### **General Procedure for the installation of $\alpha$ 2,6 Neu5Ac using ST6Gal1**

To a solution of *N*-glycan acceptor (5-10 mM) and CMP-Neu5Ac (1.5 eq per Neu5Ac) in a sodium cacodylate buffer solution (50 mM, pH 7.2) containing BSA (1% total volume) was added ST6Gal1 (2% *wt/wt* relative to acceptor substrate) and CIAP (1% volume total), and the reaction mixture was incubated at 37 °C for 16 h. Reaction progress was monitored by ESI-MS, if starting material remained after 16 h, another portion of ST3Gal4 was added until no starting material could be detected. The reaction mixture was centrifuged, and the resulting supernatant was loaded on Bio-Gel P4 column (eluent: 0.1 NH<sub>4</sub>HCO<sub>3</sub>). Product containing fractions were combined and lyophilized for further purification by HPLC.

## 1.4 NMR characterization data

Nuclear magnetic resonance spectra were recorded with Varian Varian/Agilent 600 (at 600 MHz) spectrometer, and operated at 25 °C. Samples were dissolved into 99.9% deuterium oxide (D<sub>2</sub>O). Spectra were assigned using <sup>1</sup>H-NMR, 2D-NMR including gCOSY, HSQCAD and zTOCSY experiments. Chemical shifts were referenced to internal DSS at 0 ppm for compound **1**, and assigned the GlcNAc-1α H-1 to 5.182 ppm.

The residues of the oligosaccharides were labeled as showed. Starting from the reducing terminal, GlcNAc-1, GlcNAc-2, the β-mannoside was labeled as Man-3, the α-3 mannoside as Man-4, the α-6 mannoside as Man-4', the *N*-acetylglucosamine residues as GlcNAc-5 and GlcNAc-5', followed by the galactosides residues as Gal-6 and Gal-6', the core fucoside residue as Fuc.

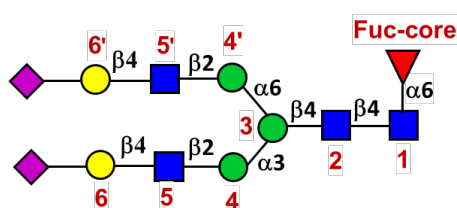

The detailed NMR characterization data of compounds **1-15** is listed below.

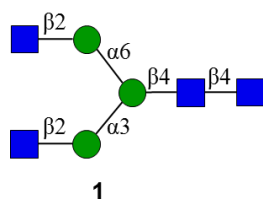

**Table S1.** <sup>1</sup>H NMR of compound **1**

|           | 1 | H1    | H2    | H3    | H4    | H5    | H6 |
|-----------|---|-------|-------|-------|-------|-------|----|
| GlcNAc-1α |   | 5.182 | 3.872 | 3.632 | NA    | NA    | NA |
| Man-4     |   | 5.107 | 4.182 | 3.892 | 3.612 | 3.735 | NA |
| Man-4'    |   | 4.912 | 4.103 | 3.858 | 3.611 | NA    | NA |
| Man-3     |   | 4.764 | 4.244 | 3.777 | 3.626 | NA    | NA |
| GlcNAc-1β |   | 4.688 | 3.683 | 3.646 | 3.511 | NA    | NA |
| GlcNAc-2  |   | 4.599 | 3.778 | 3.752 | 3.605 | NA    | NA |
| GlcNAc-5  |   | 4.546 | 3.672 | 3.696 | 3.547 | NA    | NA |
| GlcNAc-5' |   | 4.546 | 3.726 | 3.765 | 3.547 | NA    | NA |

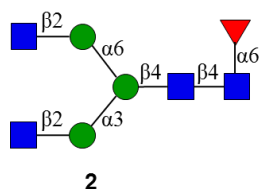



**Table S2.** <sup>1</sup>H NMR of compound **2**

| 2                 | H1    | H2    | H3    | H4    | H5    | H6 | Fuc-CH <sub>3</sub> |
|-------------------|-------|-------|-------|-------|-------|----|---------------------|
| GlcNAc-1 $\alpha$ | 5.182 | 3.888 | 3.791 | NA    | NA    | NA | —                   |
| Man-4             | 5.117 | 4.190 | 3.904 | 3.621 | 3.745 | NA | —                   |
| Man-4'            | 4.920 | 4.109 | 3.901 | 3.621 | NA    | NA | —                   |
| Man-3             | 4.776 | 4.256 | 3.779 | 3.634 | NA    | NA | —                   |
| GlcNAc-1 $\beta$  | 4.696 | 3.695 | 3.675 | NA    | NA    | NA | —                   |
| GlcNAc-2          | 4.669 | 3.786 | 3.761 | 3.603 | NA    | NA | —                   |
| GlcNAc-5          | 4.556 | 3.671 | 3.705 | 3.549 | NA    | NA | —                   |
| GlcNAc-5'         | 4.556 | 3.724 | 3.705 | 3.549 | NA    | NA | —                   |
| Fuc               | 4.934 | 3.791 | 3.908 | 3.803 | 4.118 | —  | 1.216               |

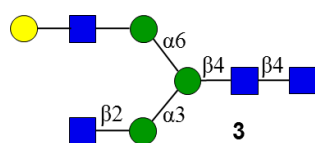

**Table S3.**  $^1\text{H}$  NMR of compound **3**

| 3                 | H1    | H2    | H3    | H4    | H5    | H6 |
|-------------------|-------|-------|-------|-------|-------|----|
| GlcNAc-1 $\alpha$ | 5.182 | 3.871 | 3.630 | NA    | NA    | NA |
| Man-4             | 5.110 | 4.183 | 3.897 | 3.615 | 3.743 | NA |
| Man-4'            | 4.922 | 4.106 | 3.882 | 3.612 | NA    | NA |
| Man-3             | 4.761 | 4.243 | 3.774 | 3.613 | NA    | NA |
| GlcNAc-1 $\beta$  | 4.690 | 3.686 | 3.625 | 3.512 | NA    | NA |
| GlcNAc-2          | 4.601 | 3.786 | 3.743 | 3.607 | NA    | NA |
| GlcNAc-5          | 4.548 | 3.691 | 3.683 | NA    | NA    | NA |
| GlcNAc-5'         | 4.576 | 3.741 | 3.733 | NA    | NA    | NA |
| Gal-6'            | 4.466 | 3.537 | 3.668 | 3.924 | NA    | NA |

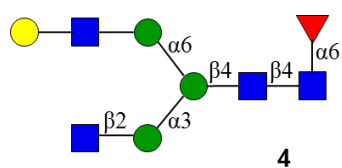

**Table S4.**  $^1\text{H}$  NMR of compound **4**

| 4                 | H1    | H2    | H3    | H4    | H5    | H6 | Fuc-CH <sub>3</sub> |
|-------------------|-------|-------|-------|-------|-------|----|---------------------|
| GlcNAc-1 $\alpha$ | 5.182 | 3.902 | 3.794 | NA    | NA    | NA | —                   |
| Man-4             | 5.118 | 4.191 | 3.906 | 3.624 | 3.746 | NA | —                   |
| Man-4'            | 4.927 | 4.111 | 3.905 | 3.623 | NA    | NA | —                   |
| Man-3             | 4.770 | 4.254 | 3.782 | 3.630 | NA    | NA | —                   |
| GlcNAc-1 $\beta$  | 4.696 | 3.708 | 3.684 | NA    | NA    | NA | —                   |
| GlcNAc-2          | 4.669 | 3.794 | 3.762 | 3.602 | NA    | NA | —                   |
| GlcNAc-5          | 4.557 | 3.699 | 3.701 | 3.572 | NA    | NA | —                   |
| GlcNAc-5'         | 4.585 | 3.752 | 3.743 | 3.572 | NA    | NA | —                   |
| Gal-6'            | 4.475 | 3.548 | 3.674 | 3.933 | NA    | NA | —                   |
| Fuc               | 4.895 | 3.794 | 3.912 | 3.804 | 4.119 | —  | 1.216               |

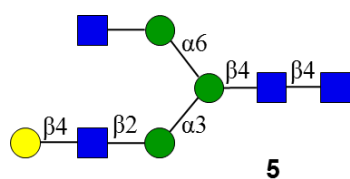

**Table S5.**  $^1\text{H}$  NMR of compound **5**

| 5                 | H1    | H2    | H3    | H4    | H5    | H6 |
|-------------------|-------|-------|-------|-------|-------|----|
| GlcNAc-1 $\alpha$ | 5.182 | 3.871 | 3.630 | NA    | NA    | NA |
| Man-4             | 5.112 | 4.186 | 3.897 | 3.614 | 3.742 | NA |
| Man-4'            | 4.913 | 4.104 | 3.883 | 3.613 | NA    | NA |
| Man-3             | 4.766 | 4.245 | 3.774 | 3.623 | NA    | NA |
| GlcNAc-1 $\beta$  | 4.690 | 3.687 | 3.621 | 3.512 | NA    | NA |
| GlcNAc-2          | 4.602 | 3.788 | 3.742 | 3.606 | NA    | NA |
| GlcNAc-5          | 4.575 | 3.740 | 3.727 | NA    | NA    | NA |
| GlcNAc-5'         | 4.547 | 3.697 | 3.689 | NA    | NA    | NA |
| Gal-6             | 4.462 | 3.534 | 3.664 | 3.921 | NA    | NA |

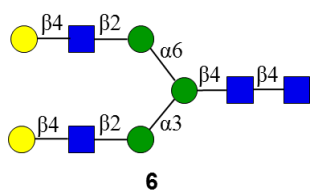

**Table S6.**  $^1\text{H}$  NMR of compound **6**

| 6                 | H1    | H2    | H3    | H4    | H5    | H6 |
|-------------------|-------|-------|-------|-------|-------|----|
| GlcNAc-1 $\alpha$ | 5.182 | 3.871 | 3.631 | NA    | NA    | NA |
| Man-4             | 5.111 | 4.185 | 3.898 | 3.614 | 3.739 | NA |
| Man-4'            | 4.922 | 4.105 | 3.885 | 3.611 | NA    | NA |
| Man-3             | 4.760 | 4.244 | 3.766 | 3.616 | NA    | NA |
| GlcNAc-1 $\beta$  | 4.689 | 3.684 | 3.623 | 3.513 | NA    | NA |
| GlcNAc-2          | 4.596 | 3.788 | 3.743 | 3.606 | NA    | NA |
| GlcNAc-5          | 4.574 | 3.736 | 3.727 | 3.568 | NA    | NA |
| GlcNAc-5'         | 4.574 | 3.736 | 3.727 | 3.568 | NA    | NA |
| Gal-6             | 4.469 | 3.539 | 3.664 | 3.923 | NA    | NA |
| Gal-6'            | 4.457 | 3.539 | 3.664 | 3.923 | NA    | NA |

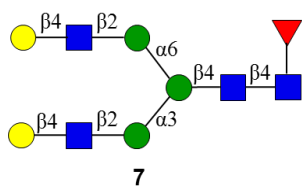

**Table S7.**  $^1\text{H}$  NMR of compound 7

| 7                 | H1    | H2    | H3    | H4    | H5    | H6 | Fuc-CH <sub>3</sub> |
|-------------------|-------|-------|-------|-------|-------|----|---------------------|
| GlcNAc-1 $\alpha$ | 5.182 | 3.901 | 3.795 | NA    | NA    | NA | —                   |
| Man-4             | 5.121 | 4.195 | 3.905 | 3.619 | 3.746 | NA | —                   |
| Man-4'            | 4.929 | 4.111 | 3.896 | 3.622 | NA    | NA | —                   |
| Man-3             | 4.771 | 4.256 | 3.781 | 3.629 | NA    | NA | —                   |
| GlcNAc-1 $\beta$  | 4.696 | 3.708 | 3.684 | NA    | NA    | NA | —                   |
| GlcNAc-2          | 4.670 | 3.794 | 3.744 | 3.600 | NA    | NA | —                   |
| GlcNAc-5          | 4.584 | 3.748 | 3.733 | 3.574 | NA    | NA | —                   |
| GlcNAc-5'         | 4.584 | 3.748 | 3.733 | 3.574 | NA    | NA | —                   |
| Gal-6             | 4.480 | 3.546 | 3.672 | 3.929 | NA    | NA | —                   |
| Gal-6'            | 4.466 | 3.546 | 3.672 | 3.929 | NA    | NA | —                   |
| Fuc               | 4.896 | 3.792 | 3.911 | 3.805 | 4.117 | —  | 1.216               |

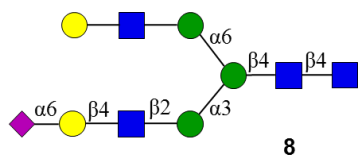

**Table S8.**  $^1\text{H}$  NMR of compound **8**

| 8                   | H1    | H2    | H3           | H4    | H5    | H6    |
|---------------------|-------|-------|--------------|-------|-------|-------|
| GlcNAc-1 $\alpha$   | 5.182 | 3.868 | 3.628        | NA    | NA    | NA    |
| Man-4               | 5.128 | 4.190 | 3.892        | 3.615 | 3.741 | NA    |
| Man-4'              | 4.924 | 4.106 | 3.886        | 3.611 | NA    | NA    |
| Man-3               | 4.764 | 4.249 | 3.775        | 3.620 | NA    | NA    |
| GlcNAc-1 $\beta$    | 4.688 | 3.684 | 3.619        | 3.513 | NA    | NA    |
| GlcNAc-2            | 4.604 | 3.794 | 3.748        | 3.620 | NA    | NA    |
| GlcNAc-5            | 4.575 | 3.746 | 3.717        | 3.564 | NA    | NA    |
| GlcNAc-5'           | 4.594 | 3.746 | 3.717        | 3.564 | NA    | NA    |
| Gal-6               | 4.466 | 3.527 | 3.672        | 3.919 | NA    | NA    |
| Gal-6'              | 4.439 | 3.540 | 3.666        | 3.922 | NA    | NA    |
| $\alpha$ 2,6-Neu5Ac | —     | —     | 2.660, 1.715 | 3.646 | 3.802 | 3.694 |





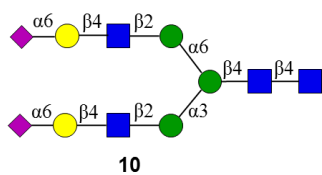

**Table S10.**  $^1\text{H}$  NMR of compound **10**

| 10                   | H1    | H2    | H3           | H4    | H5    | H6    |
|----------------------|-------|-------|--------------|-------|-------|-------|
| GlcNAc-1 $\alpha$    | 5.182 | 3.869 | 3.625        | NA    | NA    | NA    |
| Man-4                | 5.126 | 4.191 | 3.894        | 3.616 | 3.741 | NA    |
| Man-4'               | 4.942 | 4.111 | 3.887        | 3.614 | NA    | NA    |
| Man-3                | 4.767 | 4.251 | 3.776        | 3.632 | NA    | NA    |
| GlcNAc-1 $\beta$     | 4.686 | 3.686 | 3.618        | 3.511 | NA    | NA    |
| GlcNAc-2             | 4.605 | 3.788 | 3.748        | 3.618 | NA    | NA    |
| GlcNAc-5             | 4.596 | 3.747 | 3.649        | 3.592 | NA    | NA    |
| GlcNAc-5'            | 4.596 | 3.747 | 3.649        | 3.592 | NA    | NA    |
| Gal-6                | 4.436 | 3.534 | 3.662        | 3.921 | NA    | NA    |
| Gal-6'               | 4.436 | 3.534 | 3.662        | 3.921 | NA    | NA    |
| $\alpha$ 2,6-Neu5Ac  | —     | —     | 2.663, 1.714 | 3.651 | 3.800 | 3.670 |
| $\alpha$ 2,6-Neu5Ac' | —     | —     | 2.663, 1.714 | 3.651 | 3.800 | 3.670 |

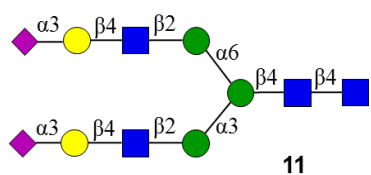

**Table S11.** <sup>1</sup>H NMR of compound **11**

| 11                   | H1    | H2    | H3           | H4    | H5    | H6    |
|----------------------|-------|-------|--------------|-------|-------|-------|
| GlcNAc-1 $\alpha$    | 5.182 | 3.869 | 3.625        | NA    | NA    | NA    |
| Man-4                | 5.109 | 4.186 | 3.892        | 3.611 | 3.738 | NA    |
| Man-4'               | 4.919 | 4.110 | 3.892        | 3.606 | 3.737 | NA    |
| Man-3                | 4.759 | 4.243 | 3.777        | 3.606 | NA    | NA    |
| GlcNAc-1 $\beta$     | 4.689 | 3.683 | 3.617        | 3.511 | NA    | NA    |
| GlcNAc-2             | 4.599 | 3.801 | 3.741        | 3.602 | NA    | NA    |
| GlcNAc-5             | 4.562 | 3.744 | 3.686        | 3.564 | NA    | NA    |
| GlcNAc-5'            | 4.562 | 3.744 | 3.686        | 3.564 | NA    | NA    |
| Gal-6                | 4.438 | 3.565 | 4.097        | 3.949 | NA    | NA    |
| Gal-6'               | 4.438 | 3.565 | 4.097        | 3.949 | NA    | NA    |
| $\alpha$ 2,3-Neu5Ac  | —     | —     | 2.752, 1.795 | 3.683 | 3.839 | 3.666 |
| $\alpha$ 2,3-Neu5Ac' | —     | —     | 2.752, 1.795 | 3.683 | 3.839 | 3.666 |

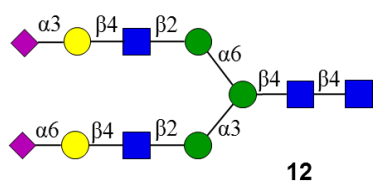

**Table S12.**  $^1\text{H}$  NMR of compound **12**

| 12                  | H1    | H2    | H3           | H4    | H5    | H6    |
|---------------------|-------|-------|--------------|-------|-------|-------|
| GlcNAc-1 $\alpha$   | 5.182 | 3.867 | 3.625        | NA    | NA    | NA    |
| Man-4               | 5.126 | 4.190 | 3.894        | 3.612 | 3.738 | NA    |
| Man-4'              | 4.918 | 4.113 | 3.878        | 3.609 | NA    | NA    |
| Man-3               | 4.762 | 4.246 | 3.777        | 3.612 | NA    | NA    |
| GlcNAc-1 $\beta$    | 4.687 | 3.685 | 3.617        | 3.513 | NA    | NA    |
| GlcNAc-2            | 4.596 | 3.755 | 3.746        | 3.616 | NA    | NA    |
| GlcNAc-5            | 4.565 | 3.753 | 3.680        | 3.563 | NA    | NA    |
| GlcNAc-5'           | 4.565 | 3.753 | 3.680        | 3.563 | NA    | NA    |
| Gal-6               | 4.436 | 3.527 | 3.661        | 3.915 | NA    | NA    |
| Gal-6'              | 4.543 | 3.563 | 4.104        | 3.952 | NA    | NA    |
| $\alpha$ 2,3-Neu5Ac | —     | —     | 2.751, 1.795 | 3.681 | 3.840 | 3.665 |
| $\alpha$ 2,6-Neu5Ac | —     | —     | 2.659, 1.715 | 3.646 | 3.797 | 3.674 |

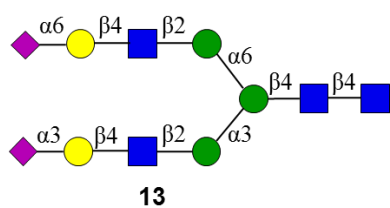

**Table S13.**  $^1\text{H}$  NMR of compound **13**

| 13                  | H1    | H2    | H3           | H4    | H5    | H6    |
|---------------------|-------|-------|--------------|-------|-------|-------|
| GlcNAc-1 $\alpha$   | 5.182 | 3.870 | 3.627        | NA    | NA    | NA    |
| Man-4               | 5.110 | 4.186 | 3.904        | 3.604 | 3.757 | NA    |
| Man-4'              | 4.941 | 4.111 | 3.893        | 3.611 | 3.741 | NA    |
| Man-3               | 4.766 | 4.246 | 3.769        | NA    | NA    | NA    |
| GlcNAc-1 $\beta$    | 4.686 | 3.685 | 3.617        | 3.511 | NA    | NA    |
| GlcNAc-2            | 4.602 | 3.754 | 3.657        | 3.603 | NA    | NA    |
| GlcNAc-5            | 4.566 | 3.737 | 3.721        | 3.571 | NA    | NA    |
| GlcNAc-5'           | 4.438 | 3.563 | 4.110        | 3.952 | NA    | NA    |
| Gal-6               | 4.537 | 3.563 | 4.110        | 3.952 | NA    | NA    |
| Gal-6'              | 4.438 | 3.530 | 3.664        | 3.925 | NA    | NA    |
| $\alpha$ 2,6-Neu5Ac | —     | —     | 2.664, 1.727 | 3.659 | 3.804 | 3.706 |
| $\alpha$ 2,3-Neu5Ac | —     | —     | 2.750, 1.800 | 3.688 | 3.842 | 3.646 |

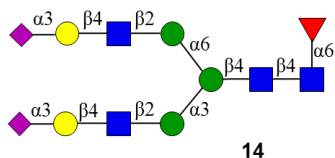

**Table S14.**  $^1\text{H}$  NMR of compound 14

| 14                   | H1    | H2    | H3           | H4    | H5    | H6    | Fuc-CH <sub>3</sub> |
|----------------------|-------|-------|--------------|-------|-------|-------|---------------------|
| GlcNAc-1 $\alpha$    | 5.182 | 3.900 | 3.784        | NA    | NA    | NA    | —                   |
| Man-4                | 5.117 | 4.192 | 3.901        | 3.614 | 3.742 | NA    | —                   |
| Man-4'               | 4.924 | 4.114 | 3.902        | 3.611 | NA    | NA    | —                   |
| Man-3                | 4.768 | 4.252 | 3.782        | 3.620 | NA    | NA    | —                   |
| GlcNAc-1 $\beta$     | 4.693 | 3.709 | 3.685        | NA    | NA    | NA    | —                   |
| GlcNAc-2             | 4.666 | 3.795 | 3.760        | 3.596 | NA    | NA    | —                   |
| GlcNAc-5             | 4.574 | 3.746 | 3.706        | 3.570 | NA    | NA    | —                   |
| GlcNAc-5'            | 4.574 | 3.746 | 3.706        | 3.570 | NA    | NA    | —                   |
| Gal-6                | 4.549 | 3.573 | 4.114        | 3.959 | NA    | NA    | —                   |
| Gal-6'               | 4.549 | 3.573 | 4.114        | 3.959 | NA    | NA    | —                   |
| Fuc                  | 4.898 | 3.794 | 3.907        | 3.806 | 4.118 | —     | 1.218               |
| $\alpha$ 2,3-Neu5Ac  | —     | —     | 2.759, 1.804 | 3.692 | 3.846 | 3.638 | —                   |
| $\alpha$ 2,3-Neu5Ac' | —     | —     | 2.759, 1.804 | 3.692 | 3.846 | 3.638 | —                   |

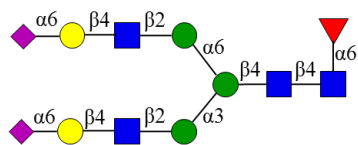

15

Table S15. <sup>1</sup>H NMR of compound 15

| 15                   | H1    | H2    | H3           | H4    | H5    | H6    | Fuc-CH <sub>3</sub> |
|----------------------|-------|-------|--------------|-------|-------|-------|---------------------|
| GlcNAc-1 $\alpha$    | 5.182 | 3.898 | 3.786        | NA    | NA    | NA    | —                   |
| Man-4                | 5.134 | 4.198 | 3.901        | 3.624 | 3.746 | NA    | —                   |
| Man-4'               | 4.943 | 4.114 | 3.901        | 3.617 | NA    | NA    | —                   |
| Man-3                | 4.777 | 4.261 | 3.781        | 3.648 | NA    | NA    | —                   |
| GlcNAc-1 $\beta$     | 4.692 | 3.706 | 3.683        | 3.600 | NA    | NA    | —                   |
| GlcNAc-2             | 4.669 | 3.792 | 3.748        | 3.603 | NA    | NA    | —                   |
| GlcNAc-5             | 4.606 | 3.757 | 3.657        | 3.593 | NA    | NA    | —                   |
| GlcNAc-5'            | 4.606 | 3.757 | 3.657        | 3.593 | NA    | NA    | —                   |
| Gal-6                | 4.446 | 3.545 | 3.657        | 3.593 | NA    | NA    | —                   |
| Gal-6'               | 4.446 | 3.545 | 3.657        | 3.593 | NA    | NA    | —                   |
| Fuc                  | 4.894 | 3.795 | 3.906        | 3.805 | 4.111 | —     | 1.216               |
| $\alpha$ 2,6-Neu5Ac  | —     | —     | 2.671, 1.723 | 3.654 | 3.804 | 3.682 | —                   |
| $\alpha$ 2,6-Neu5Ac' | —     | —     | 2.671, 1.723 | 3.654 | 3.804 | 3.682 | —                   |

## 1.5 NMR spectra

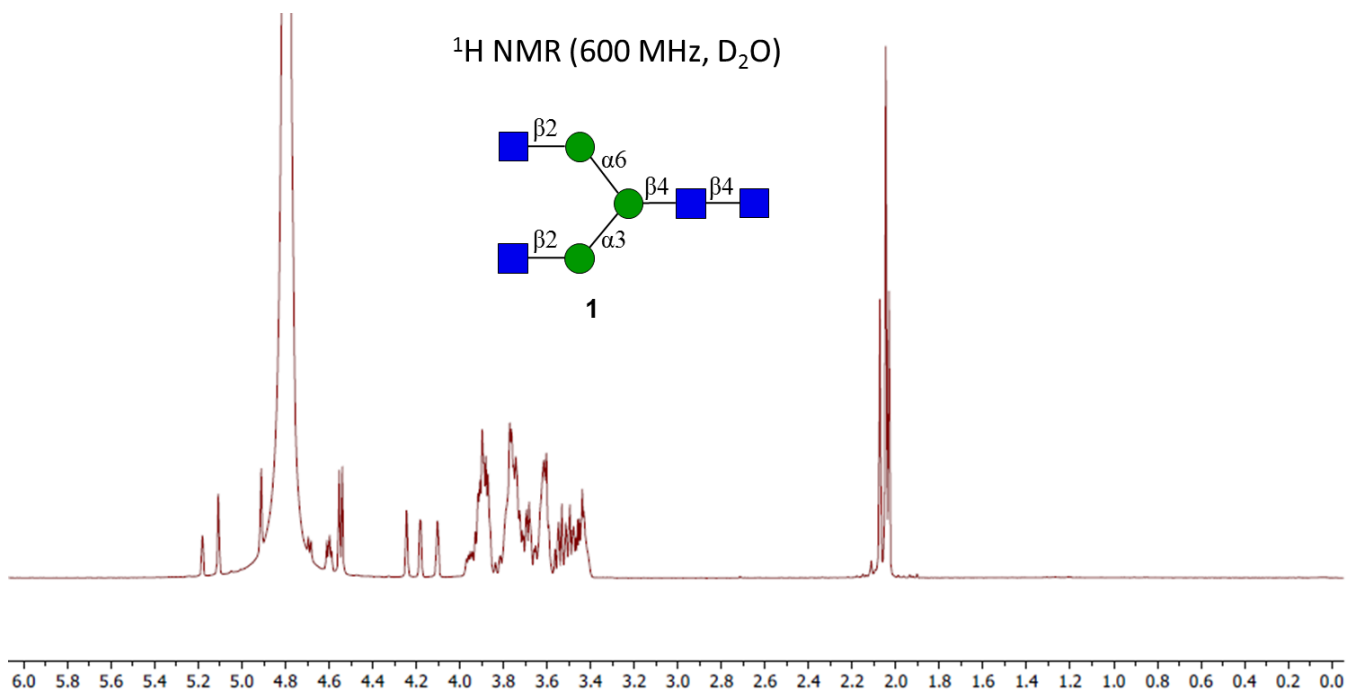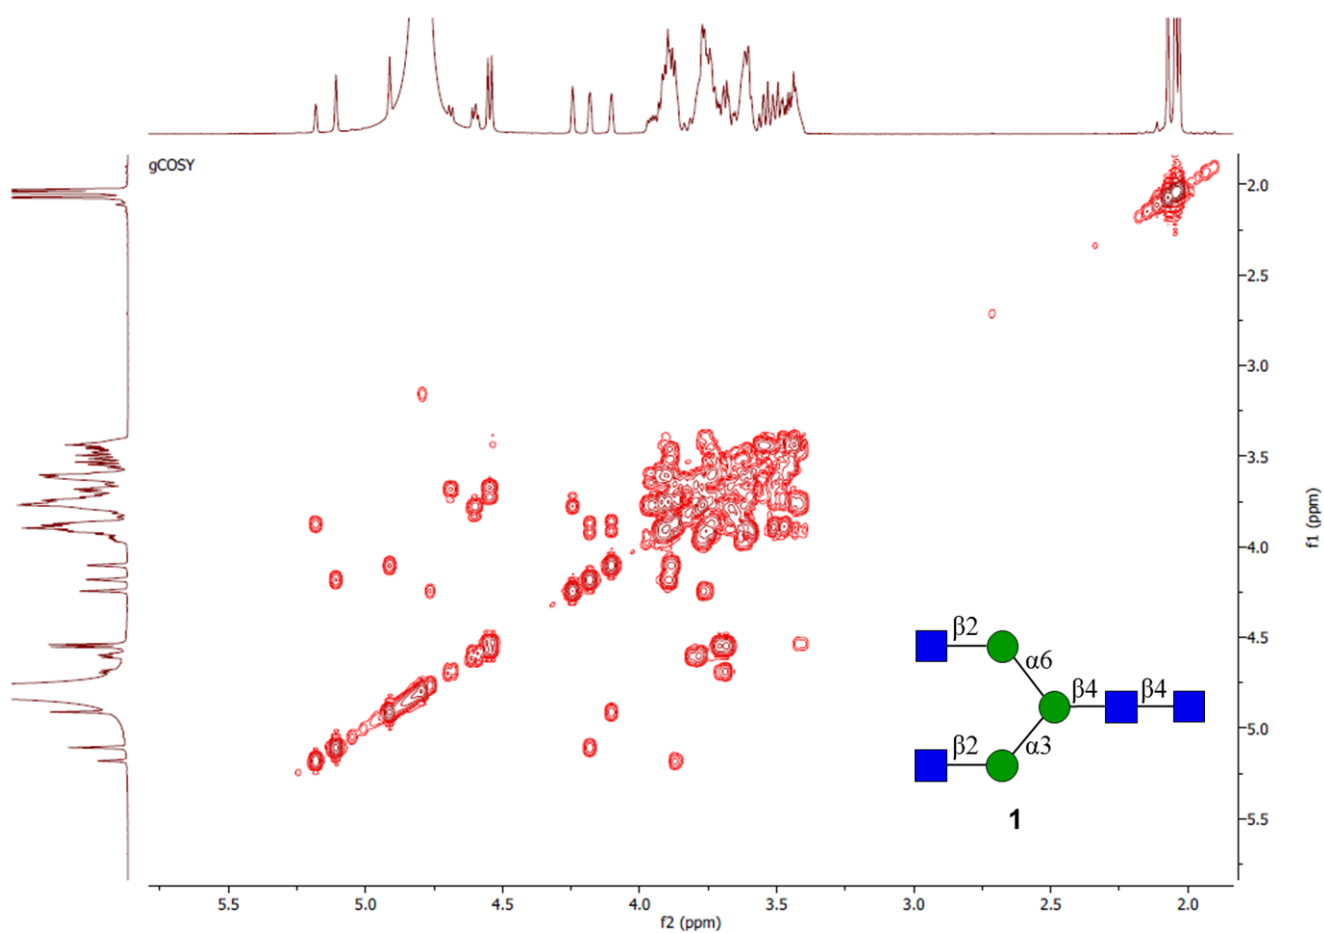

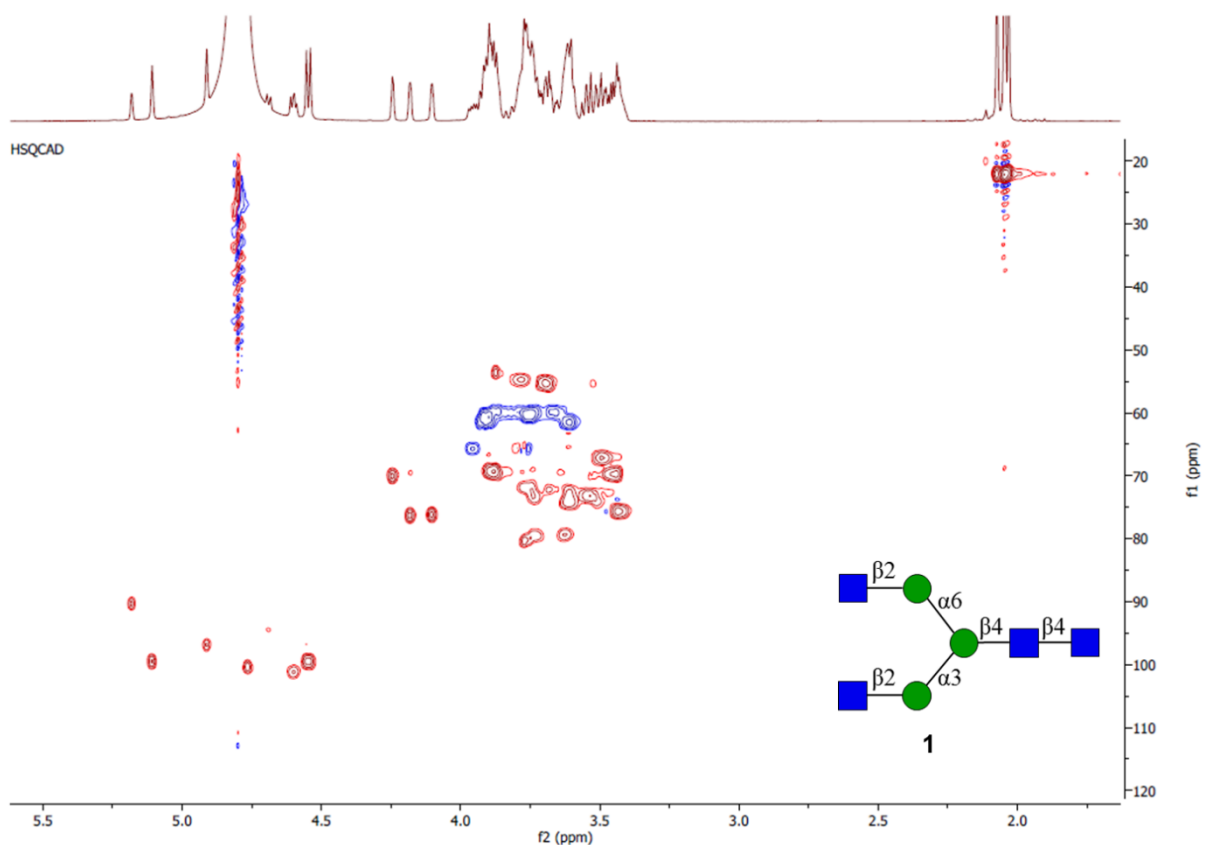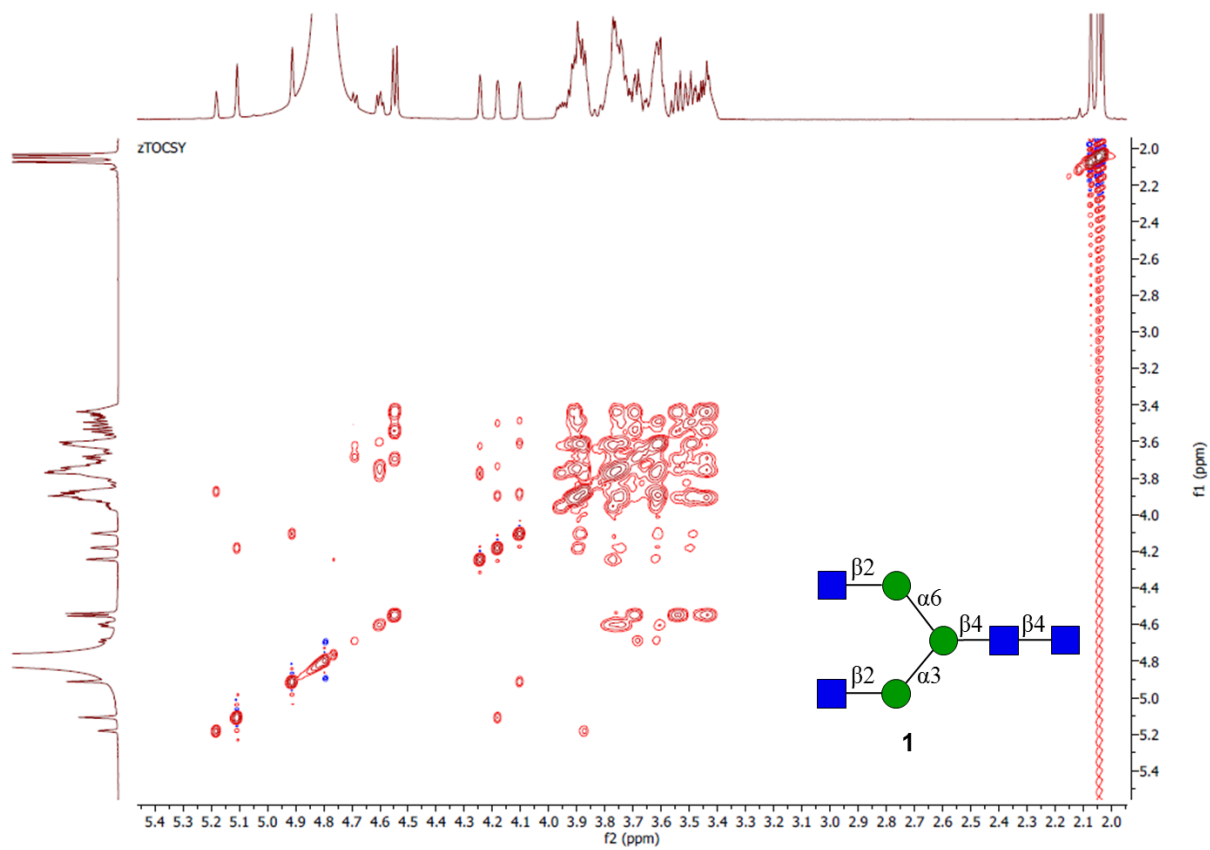

NMR spectra Compound 1



$^1\text{H}$  NMR (600 MHz,  $\text{D}_2\text{O}$ )

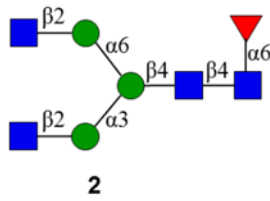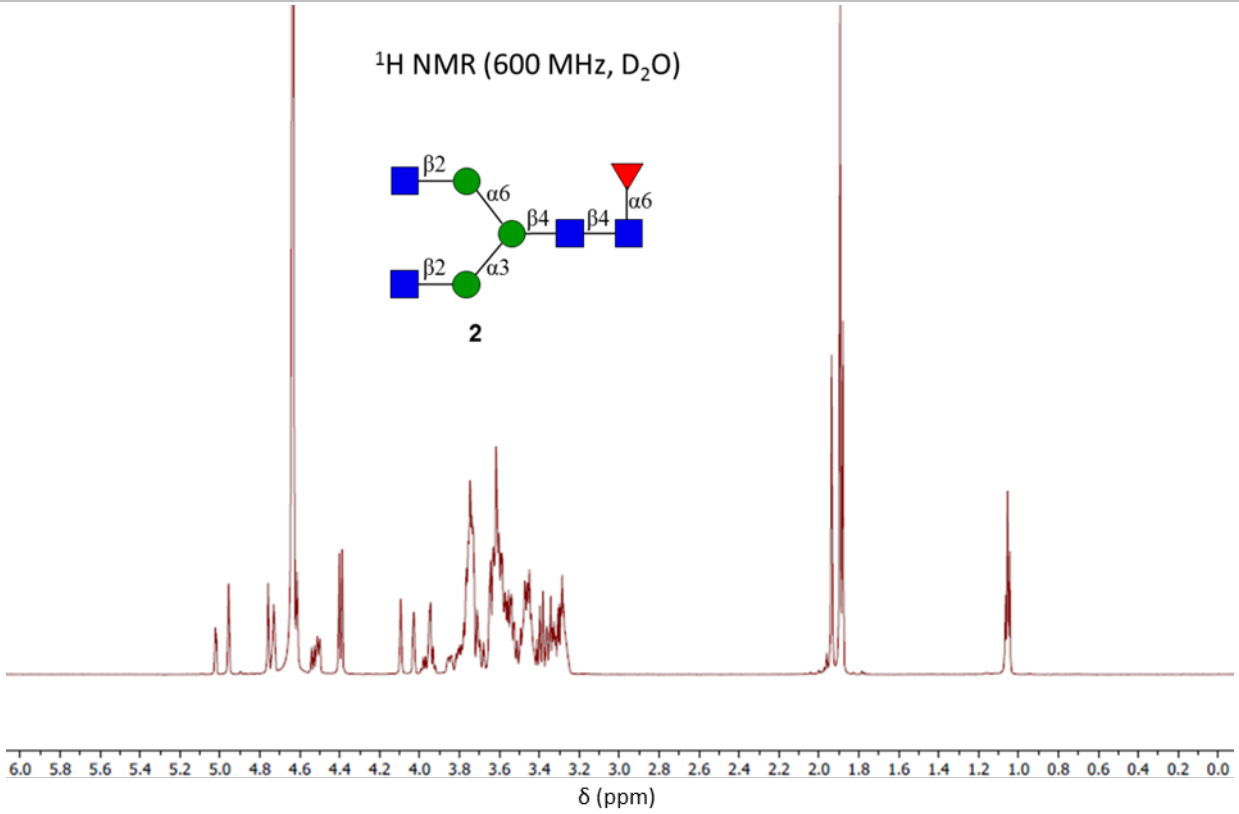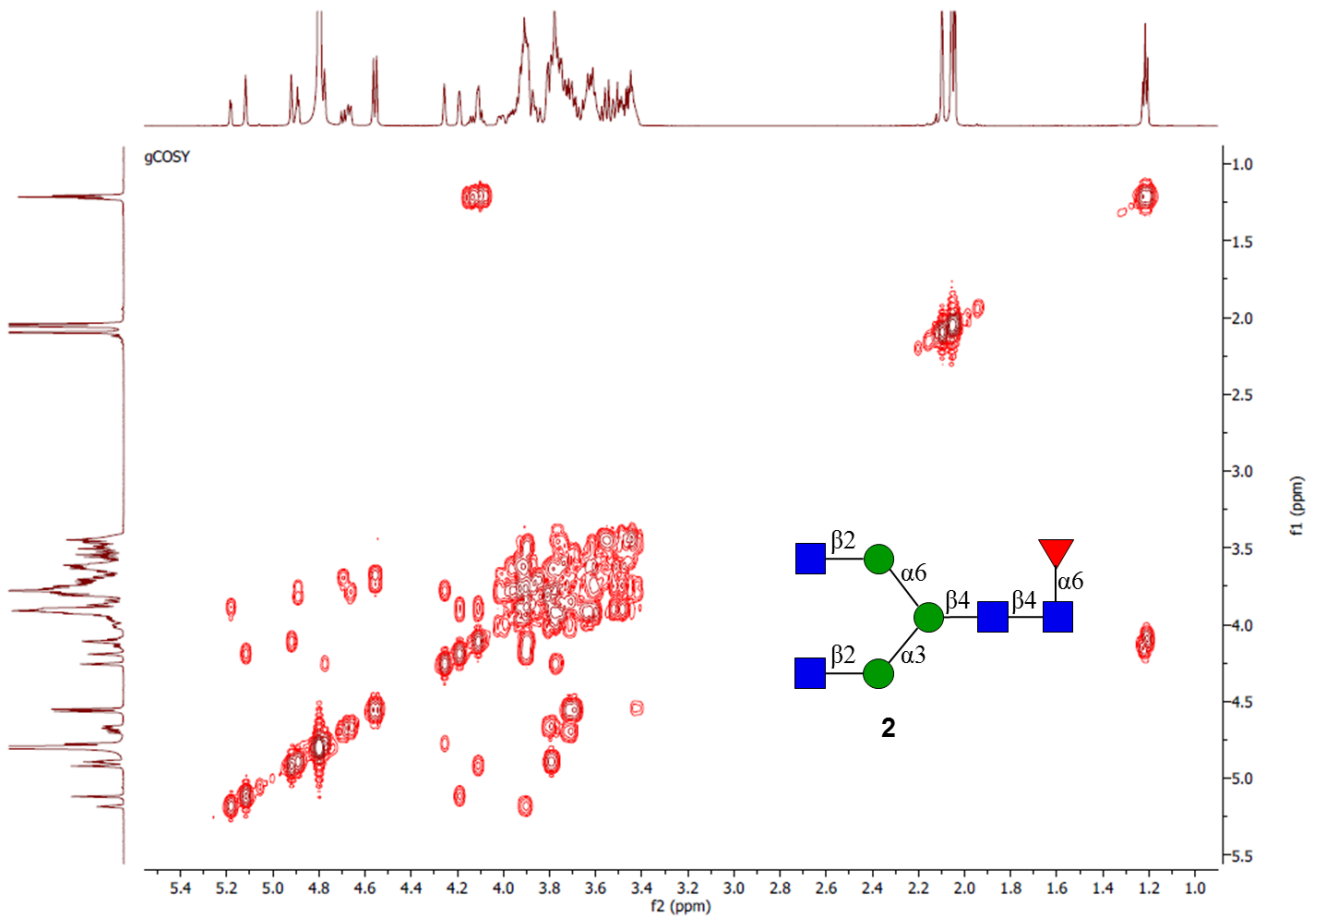

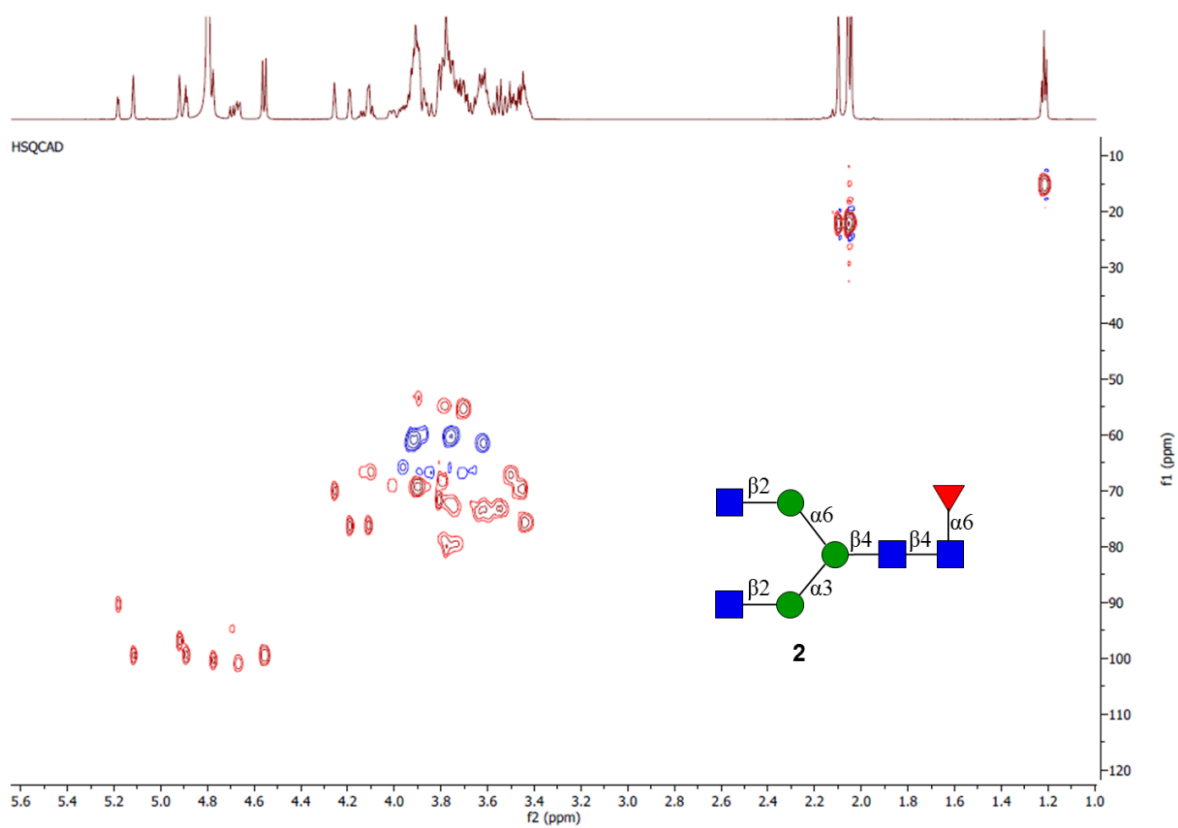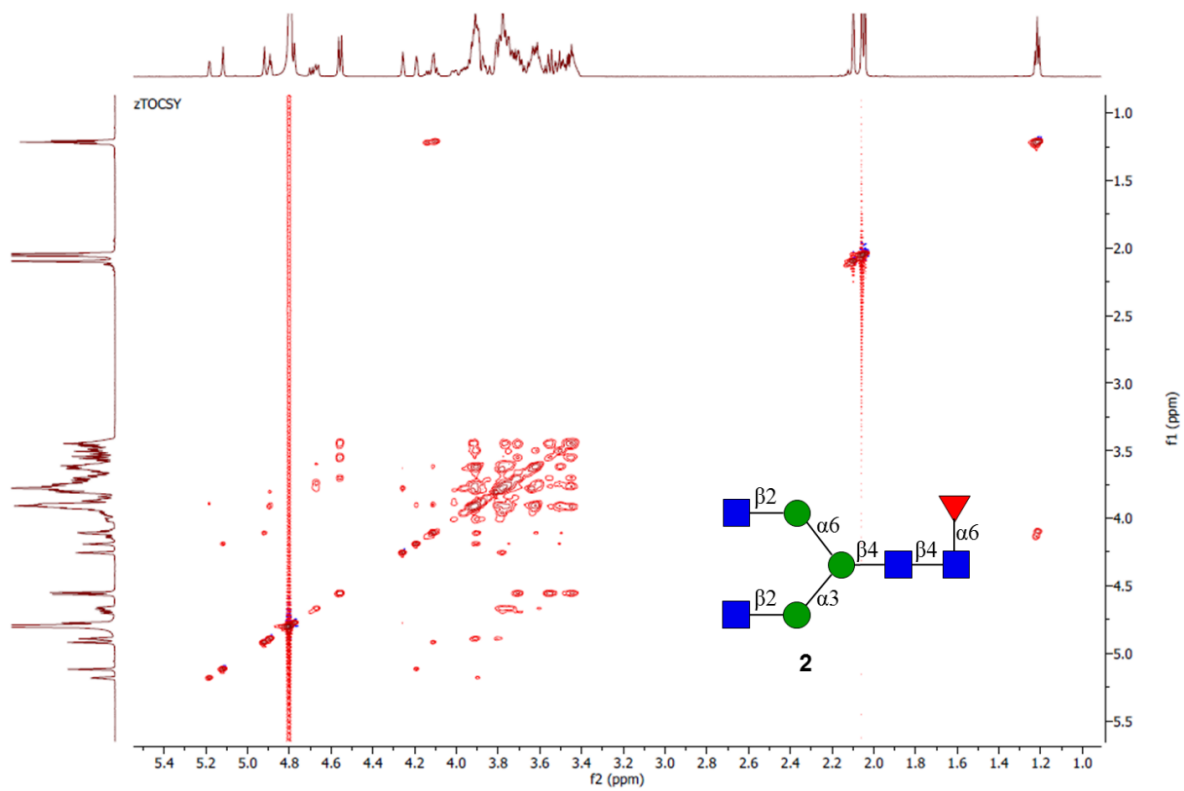

NMR spectra compound 2

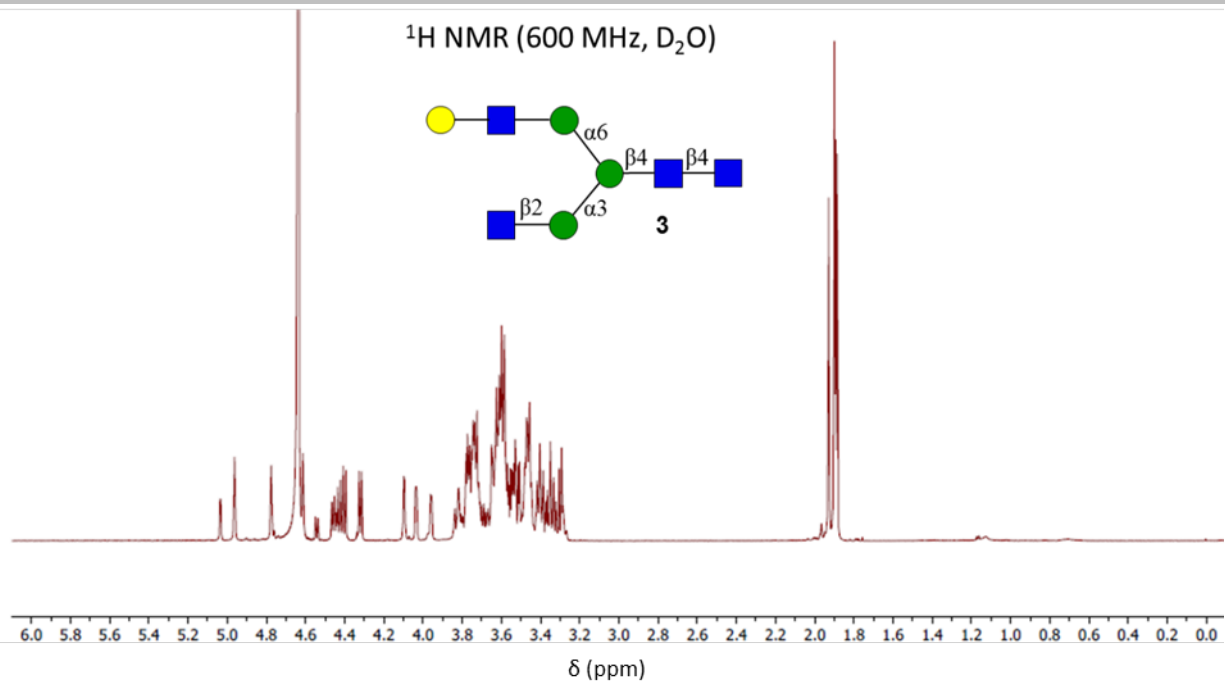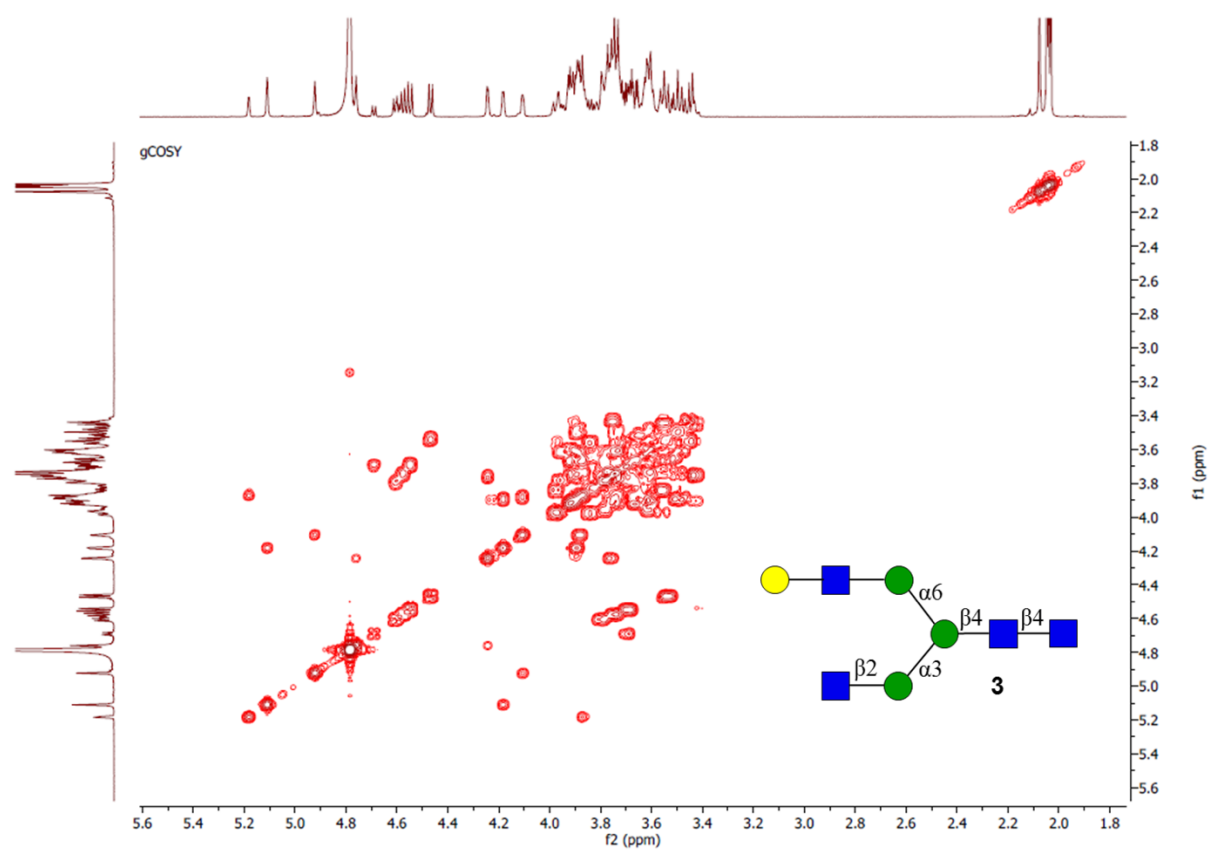

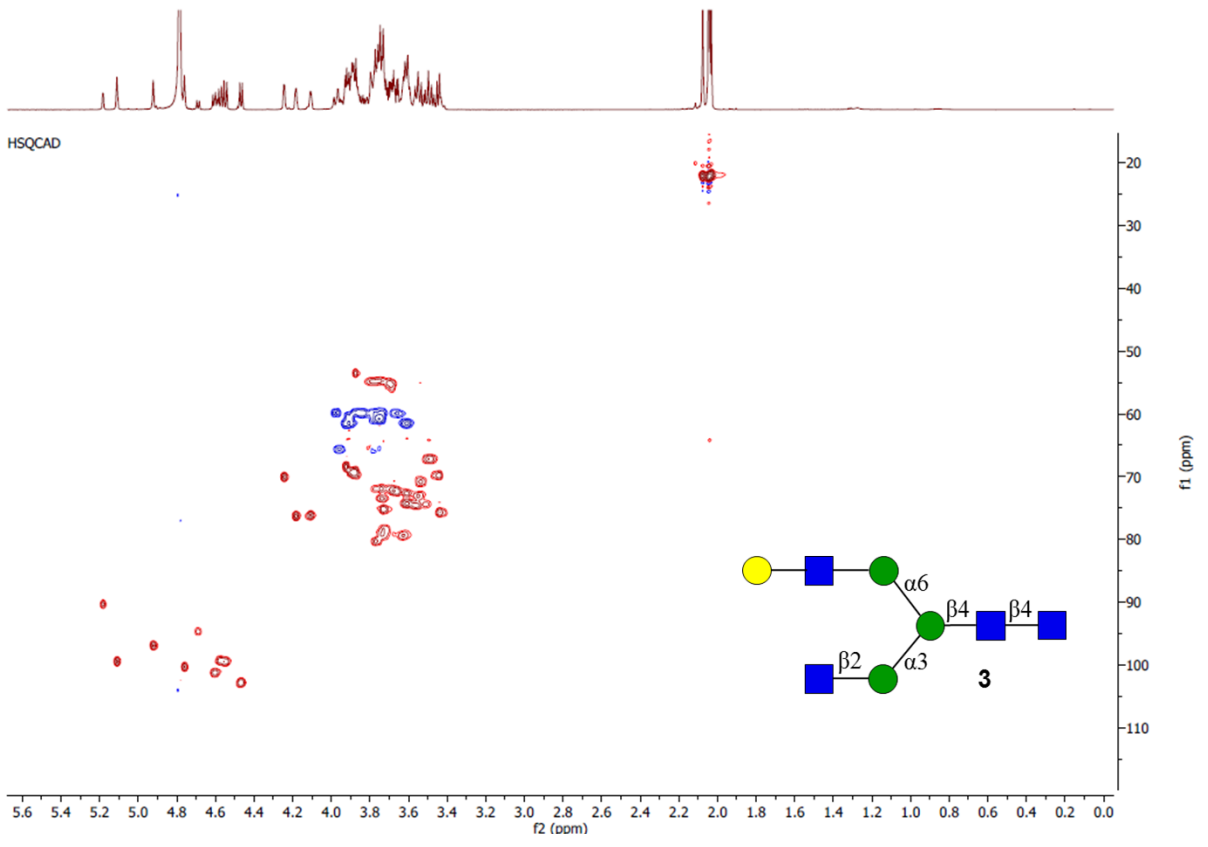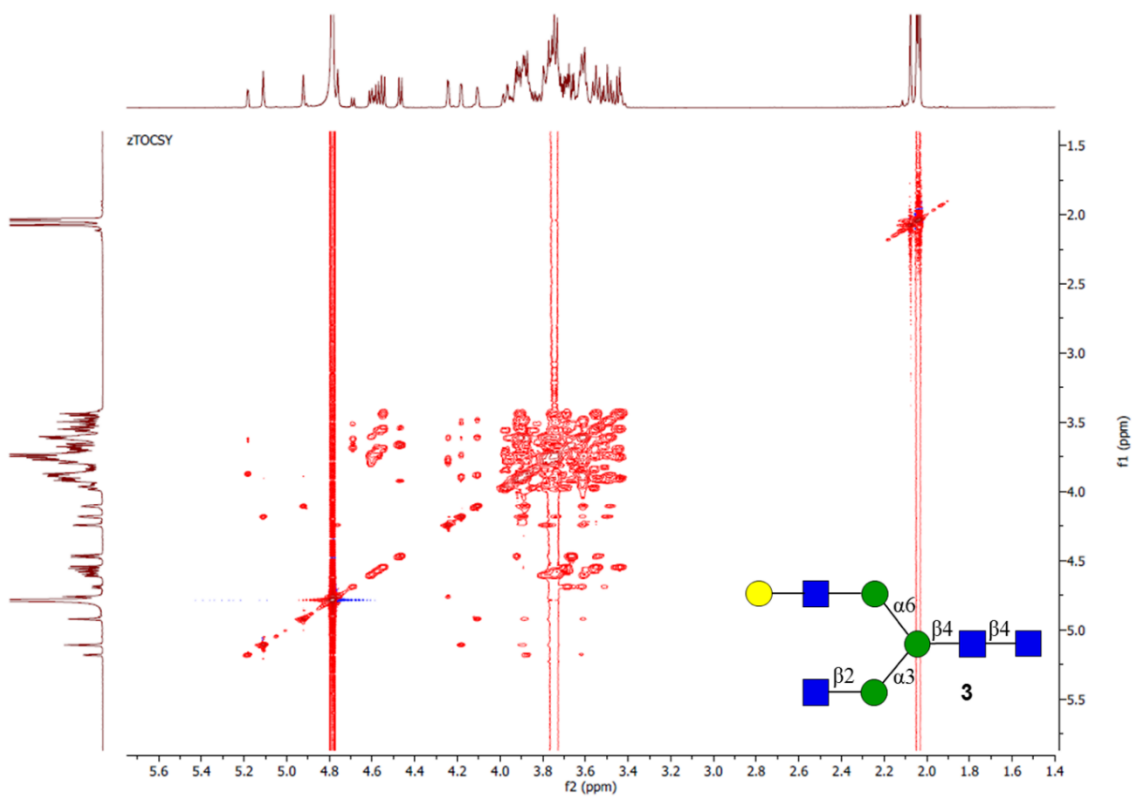

NMR spectra compound 3

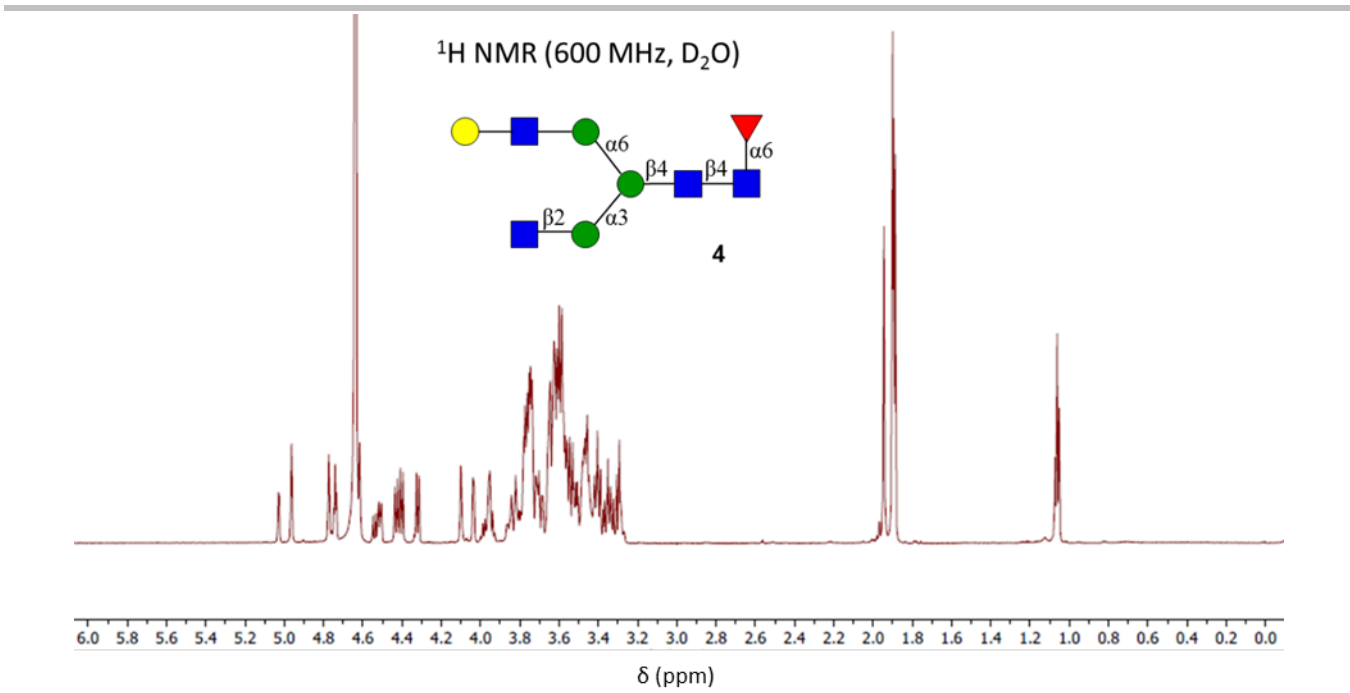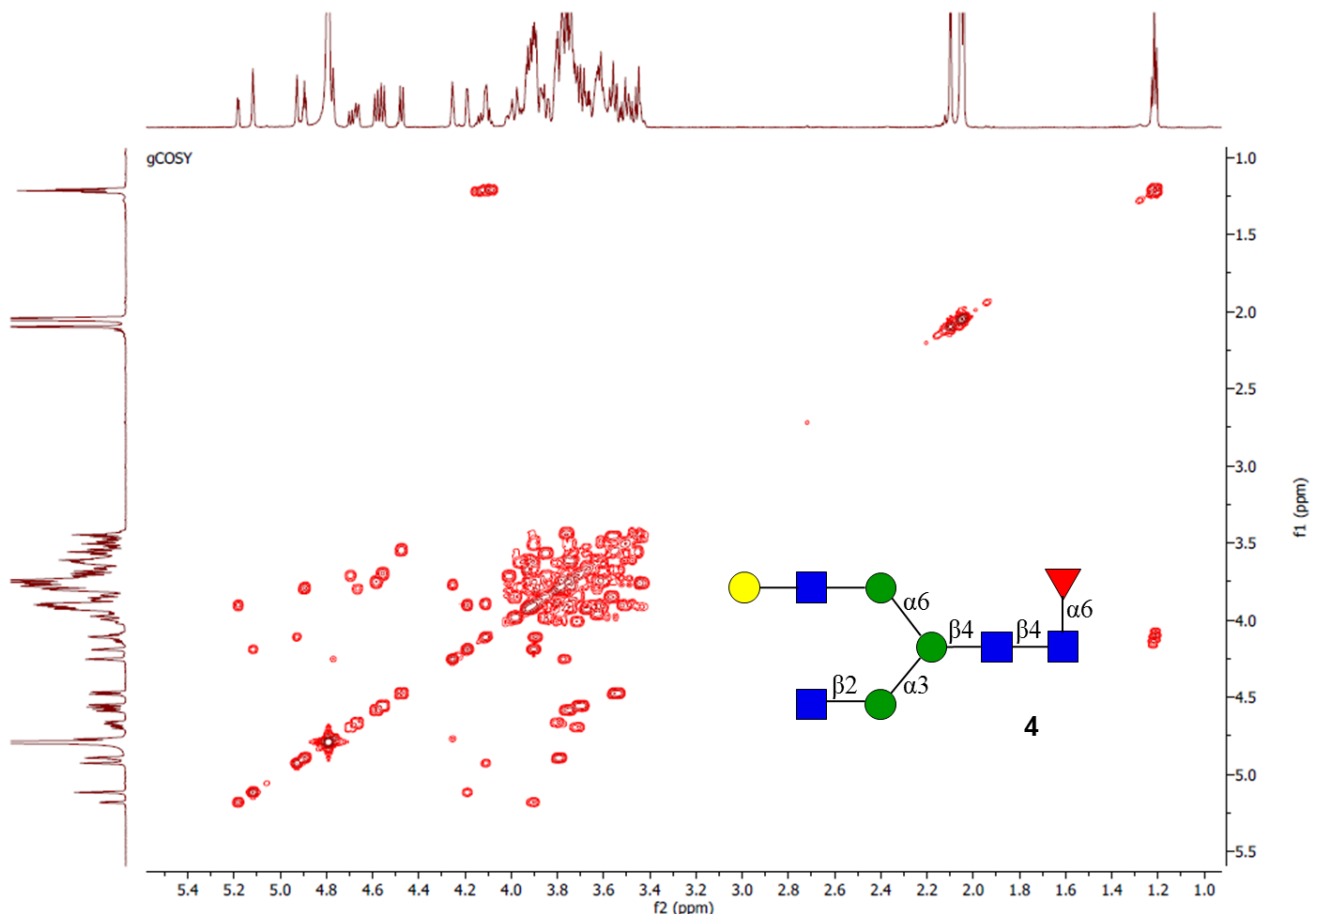

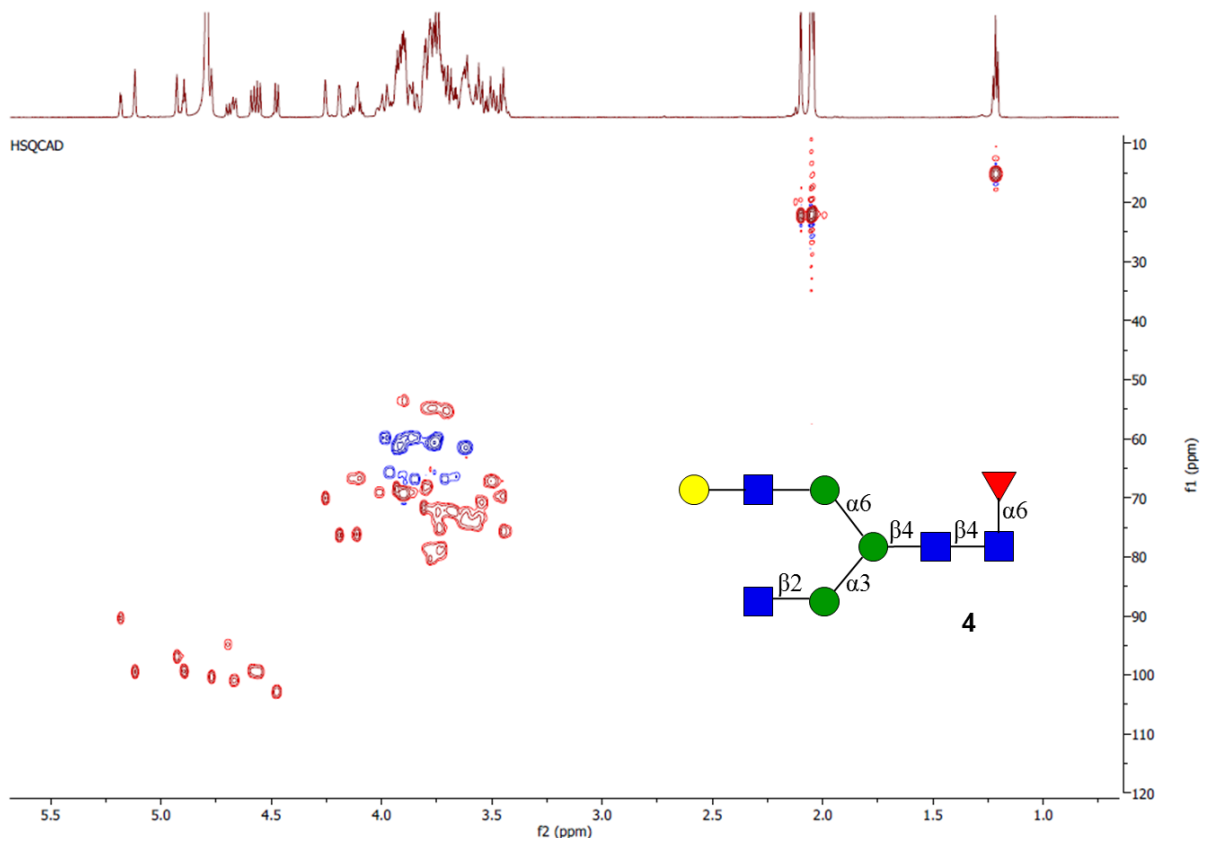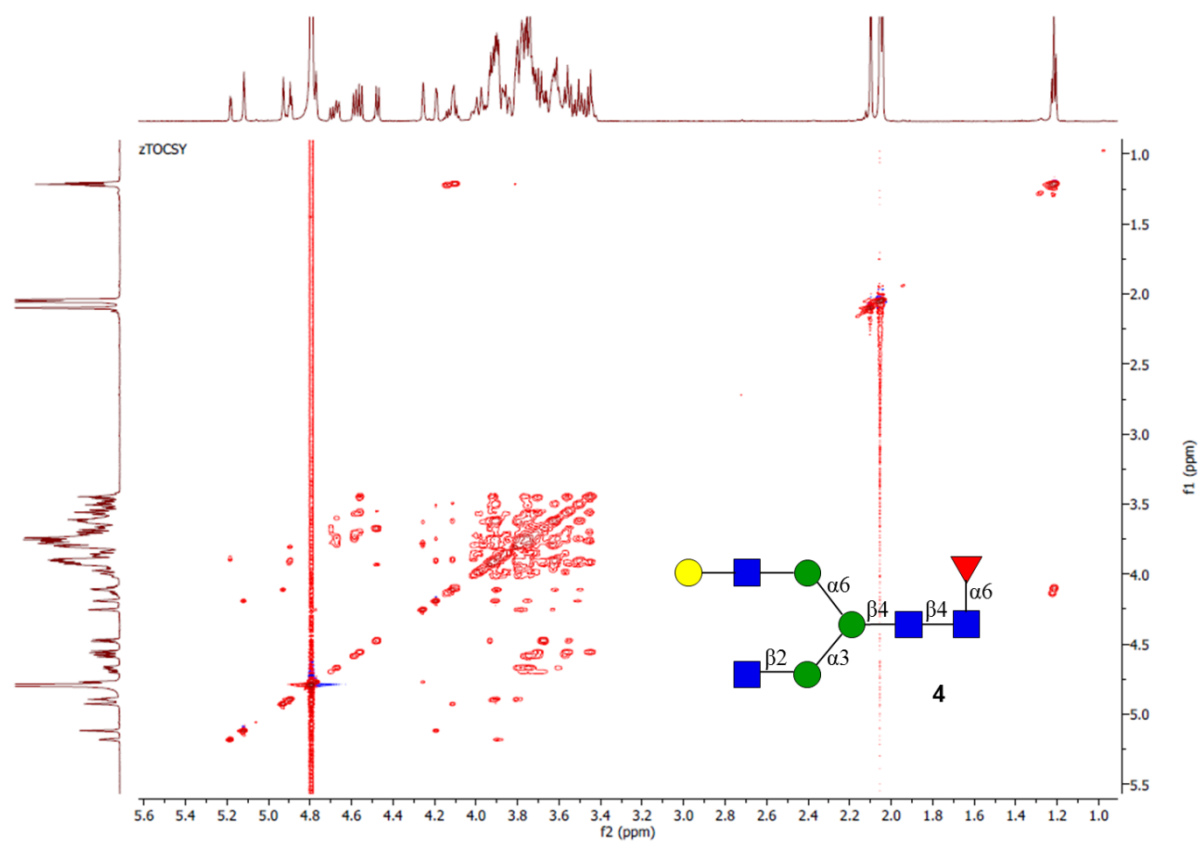

NMR spectra compound 4

# SUPPORTING INFORMATION

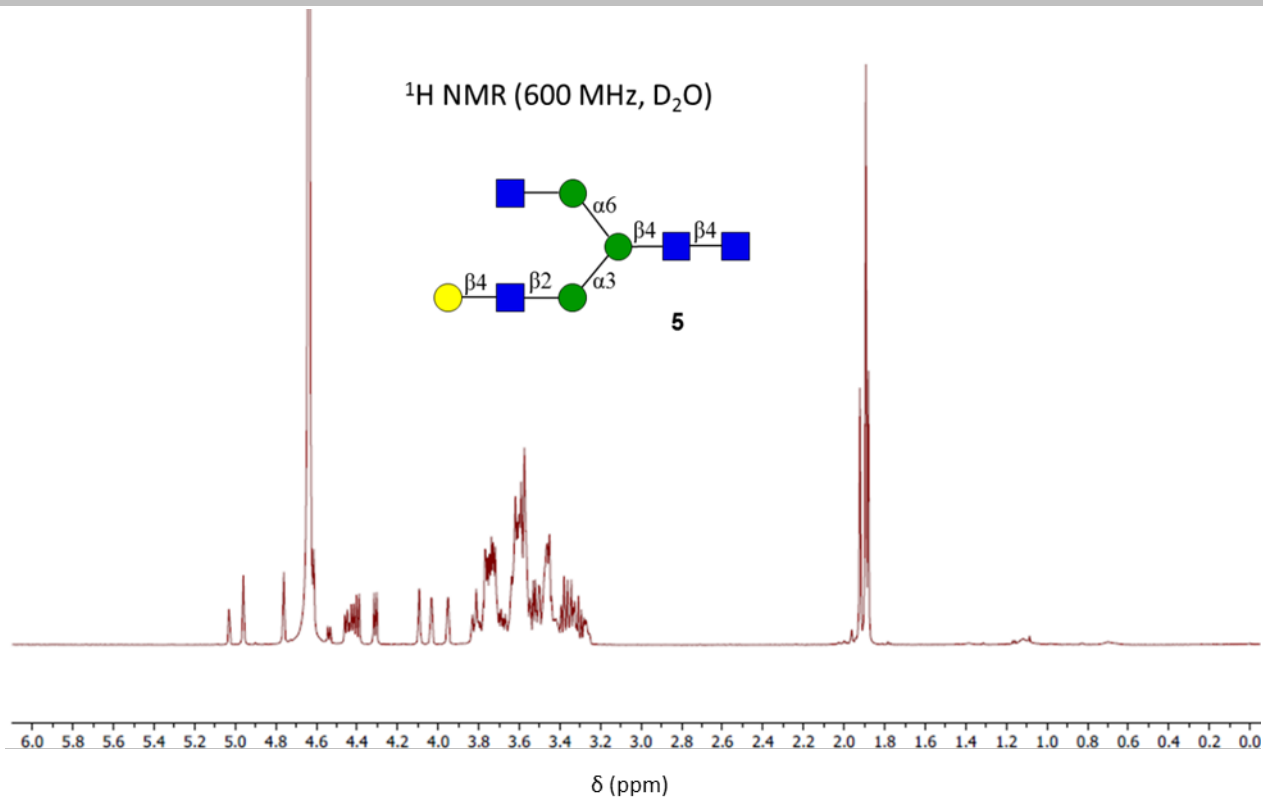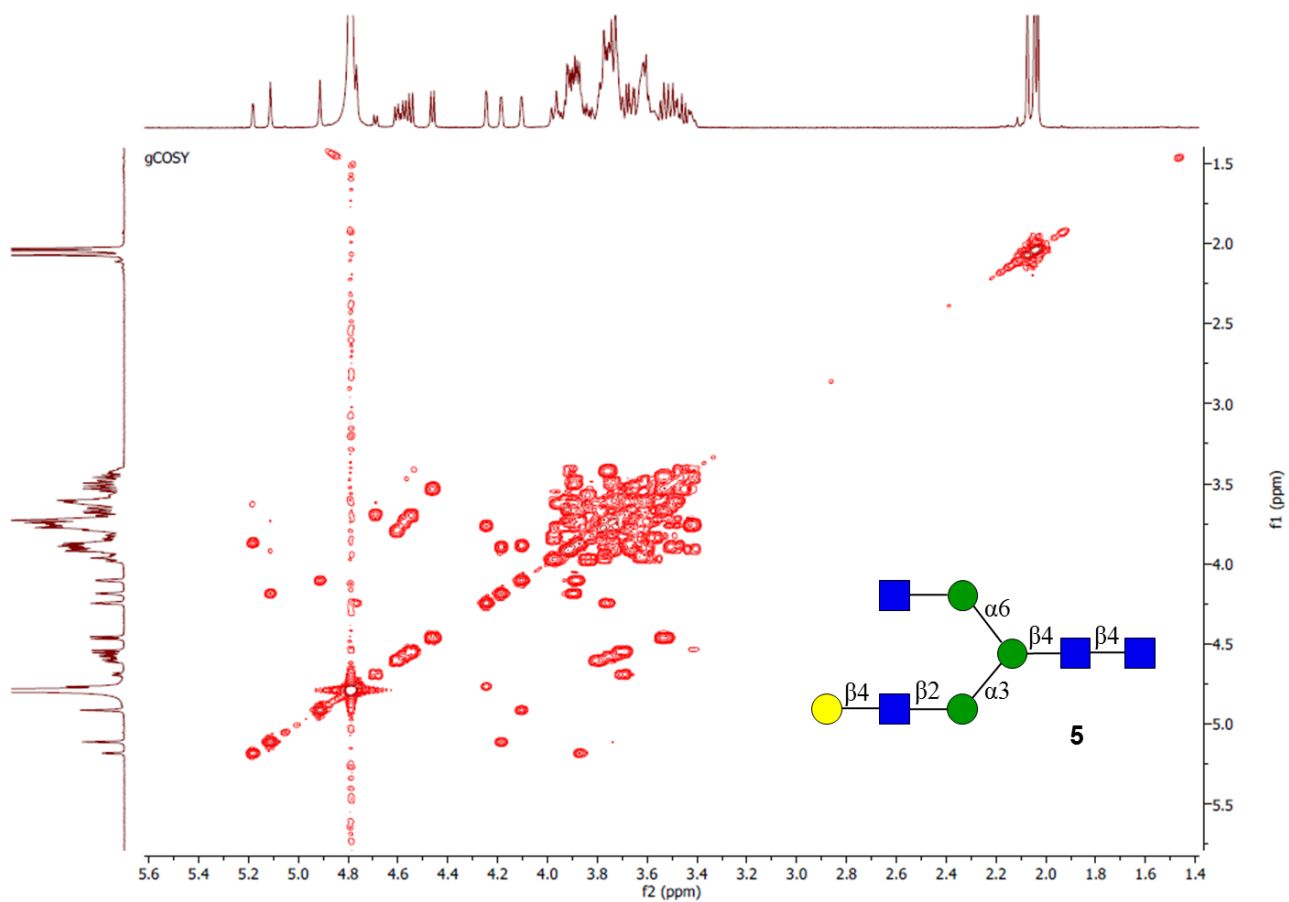

# SUPPORTING INFORMATION

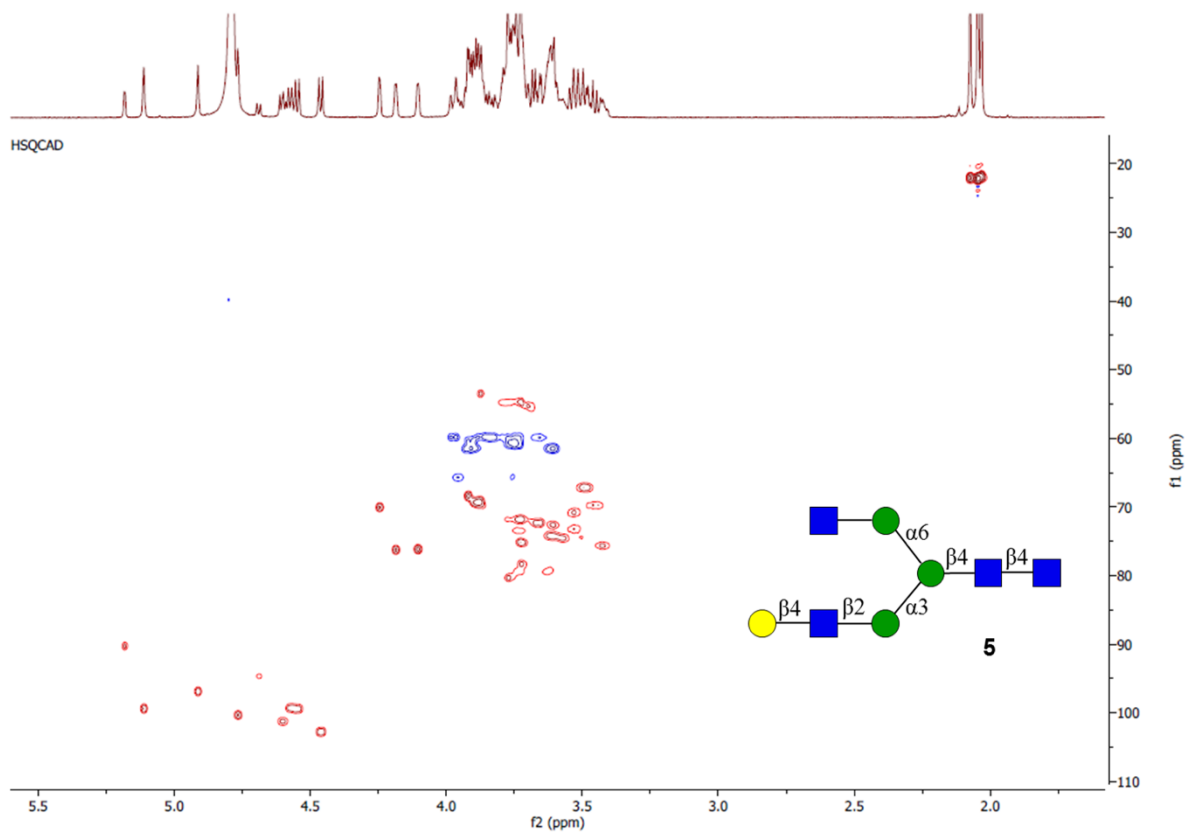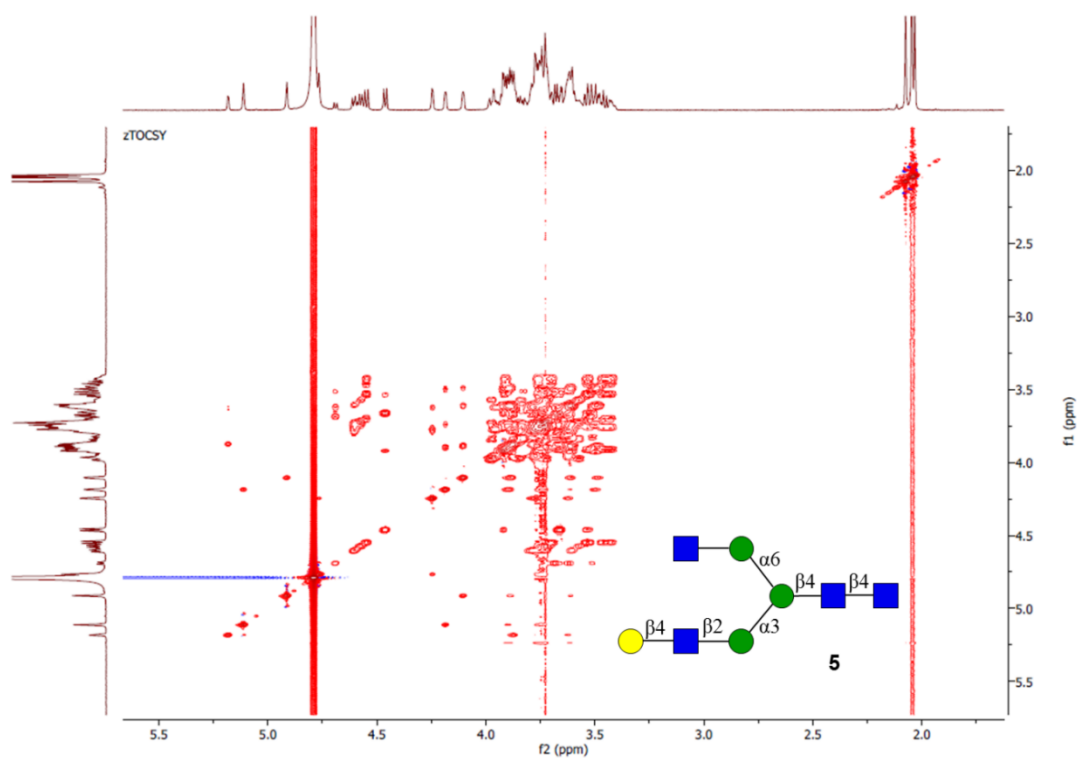

NMR spectra compound 5



# SUPPORTING INFORMATION

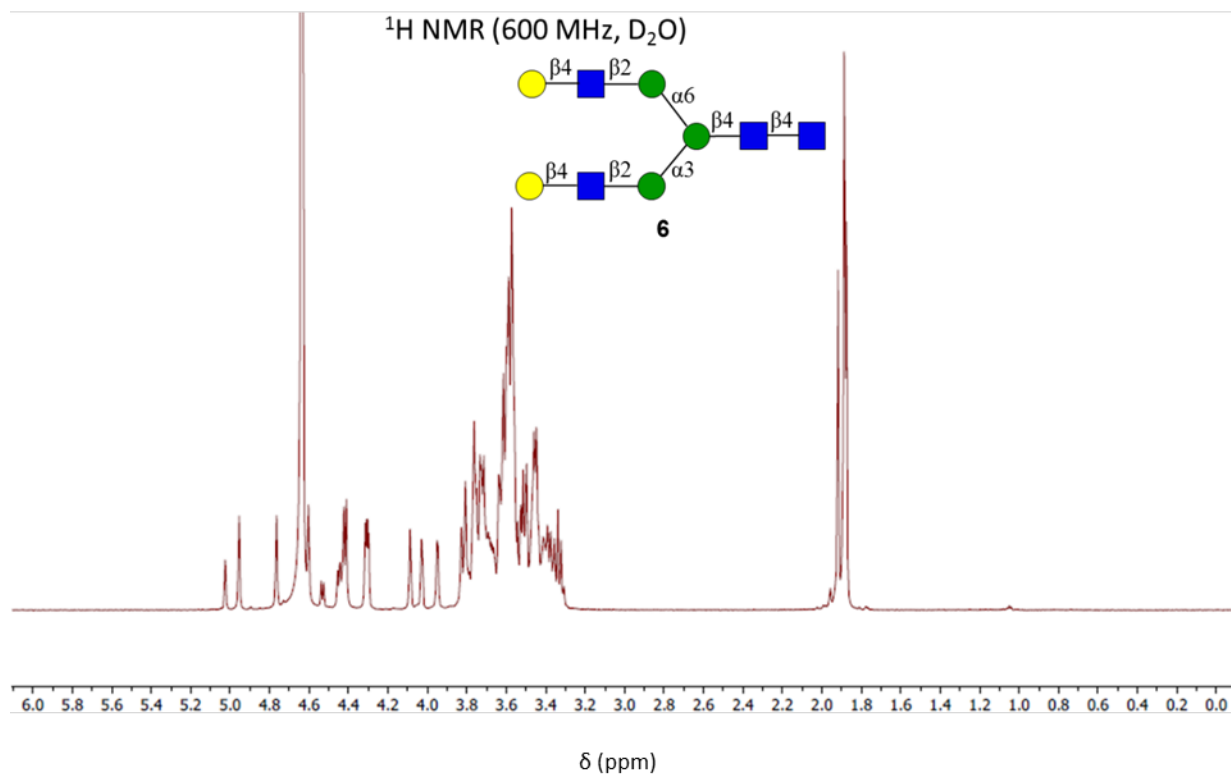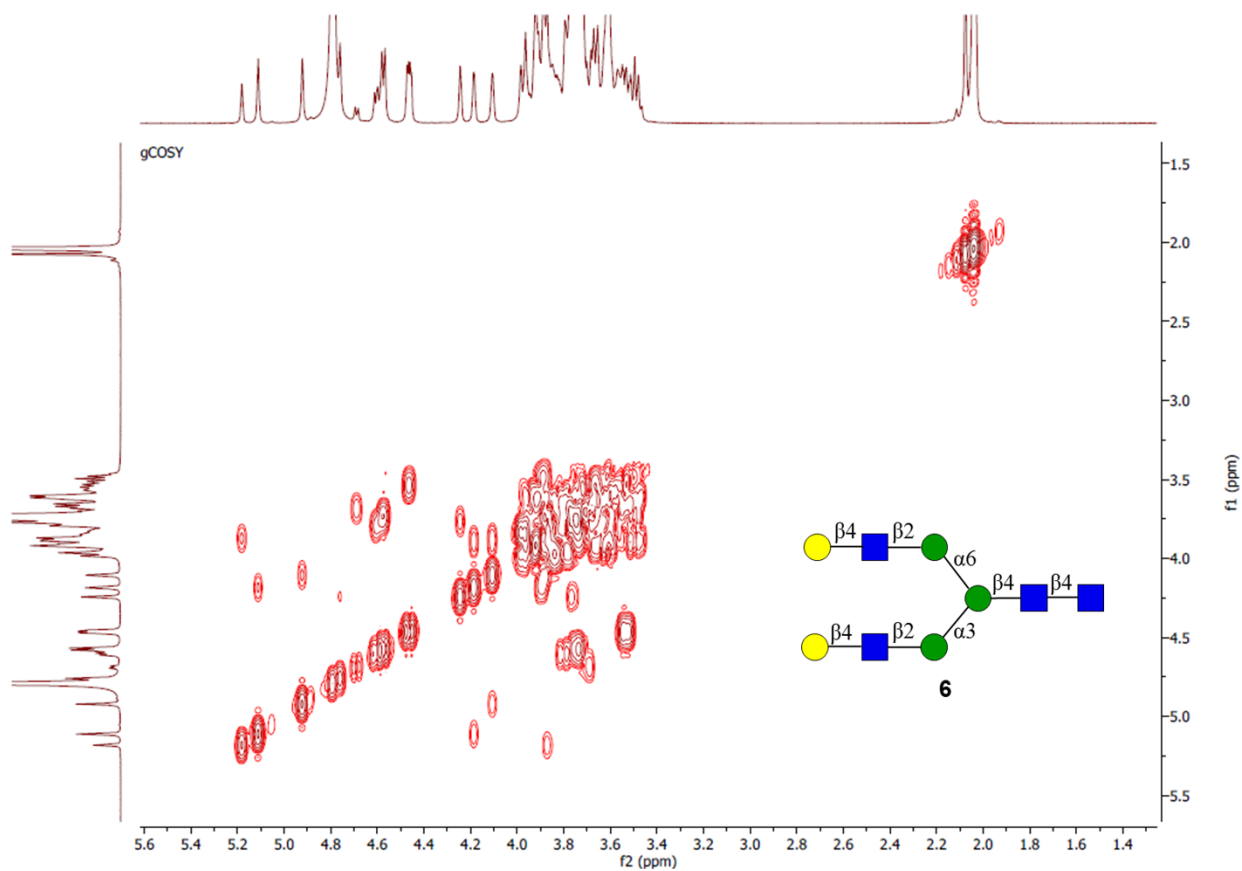

# SUPPORTING INFORMATION

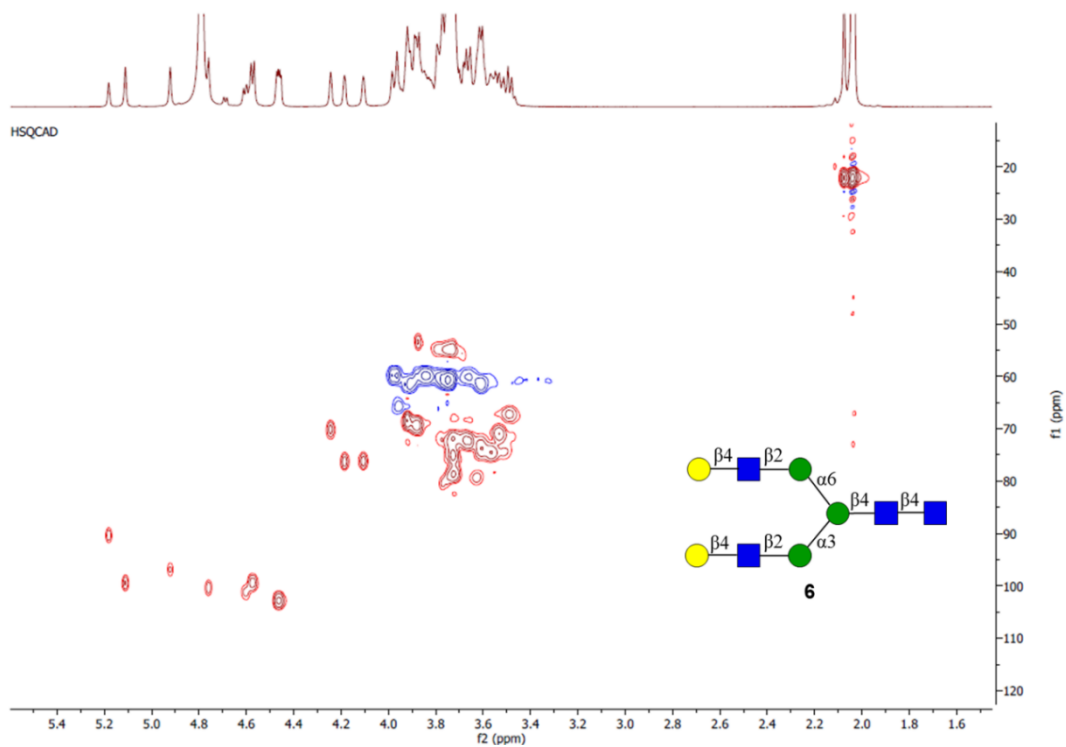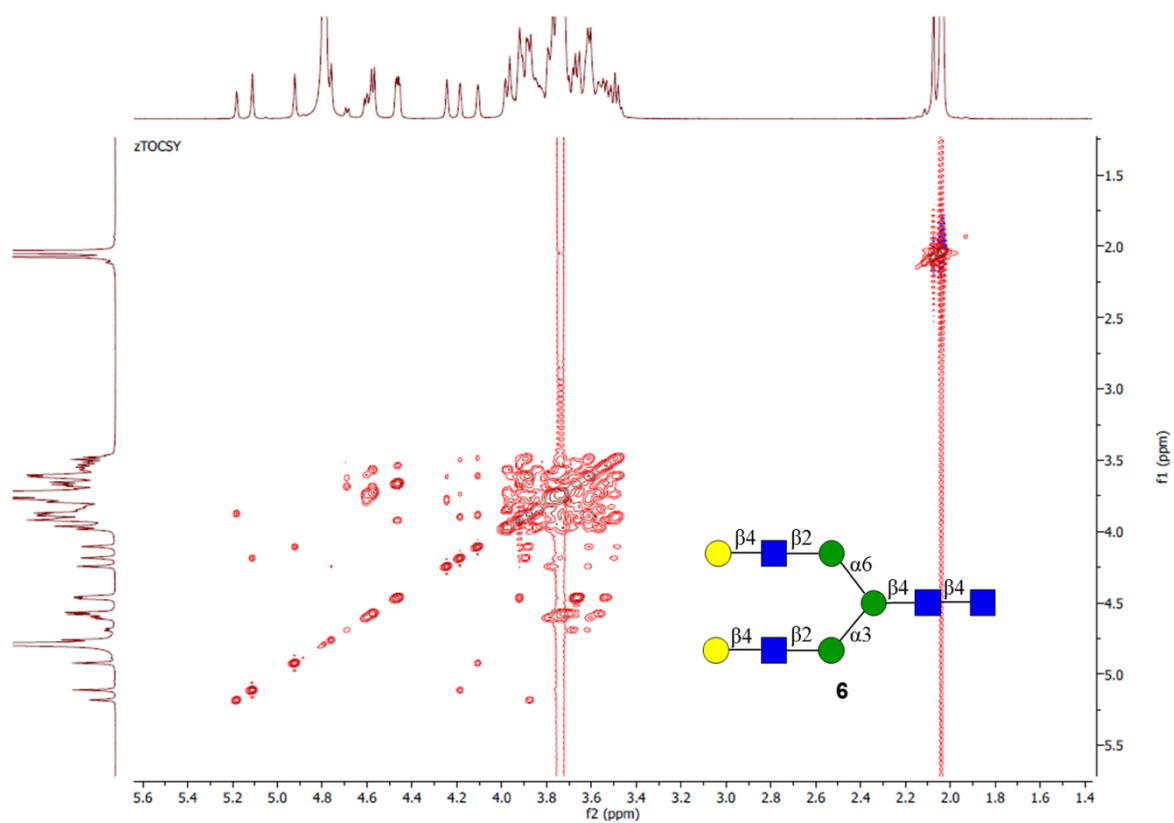

NMR spectra compound 6

# SUPPORTING INFORMATION

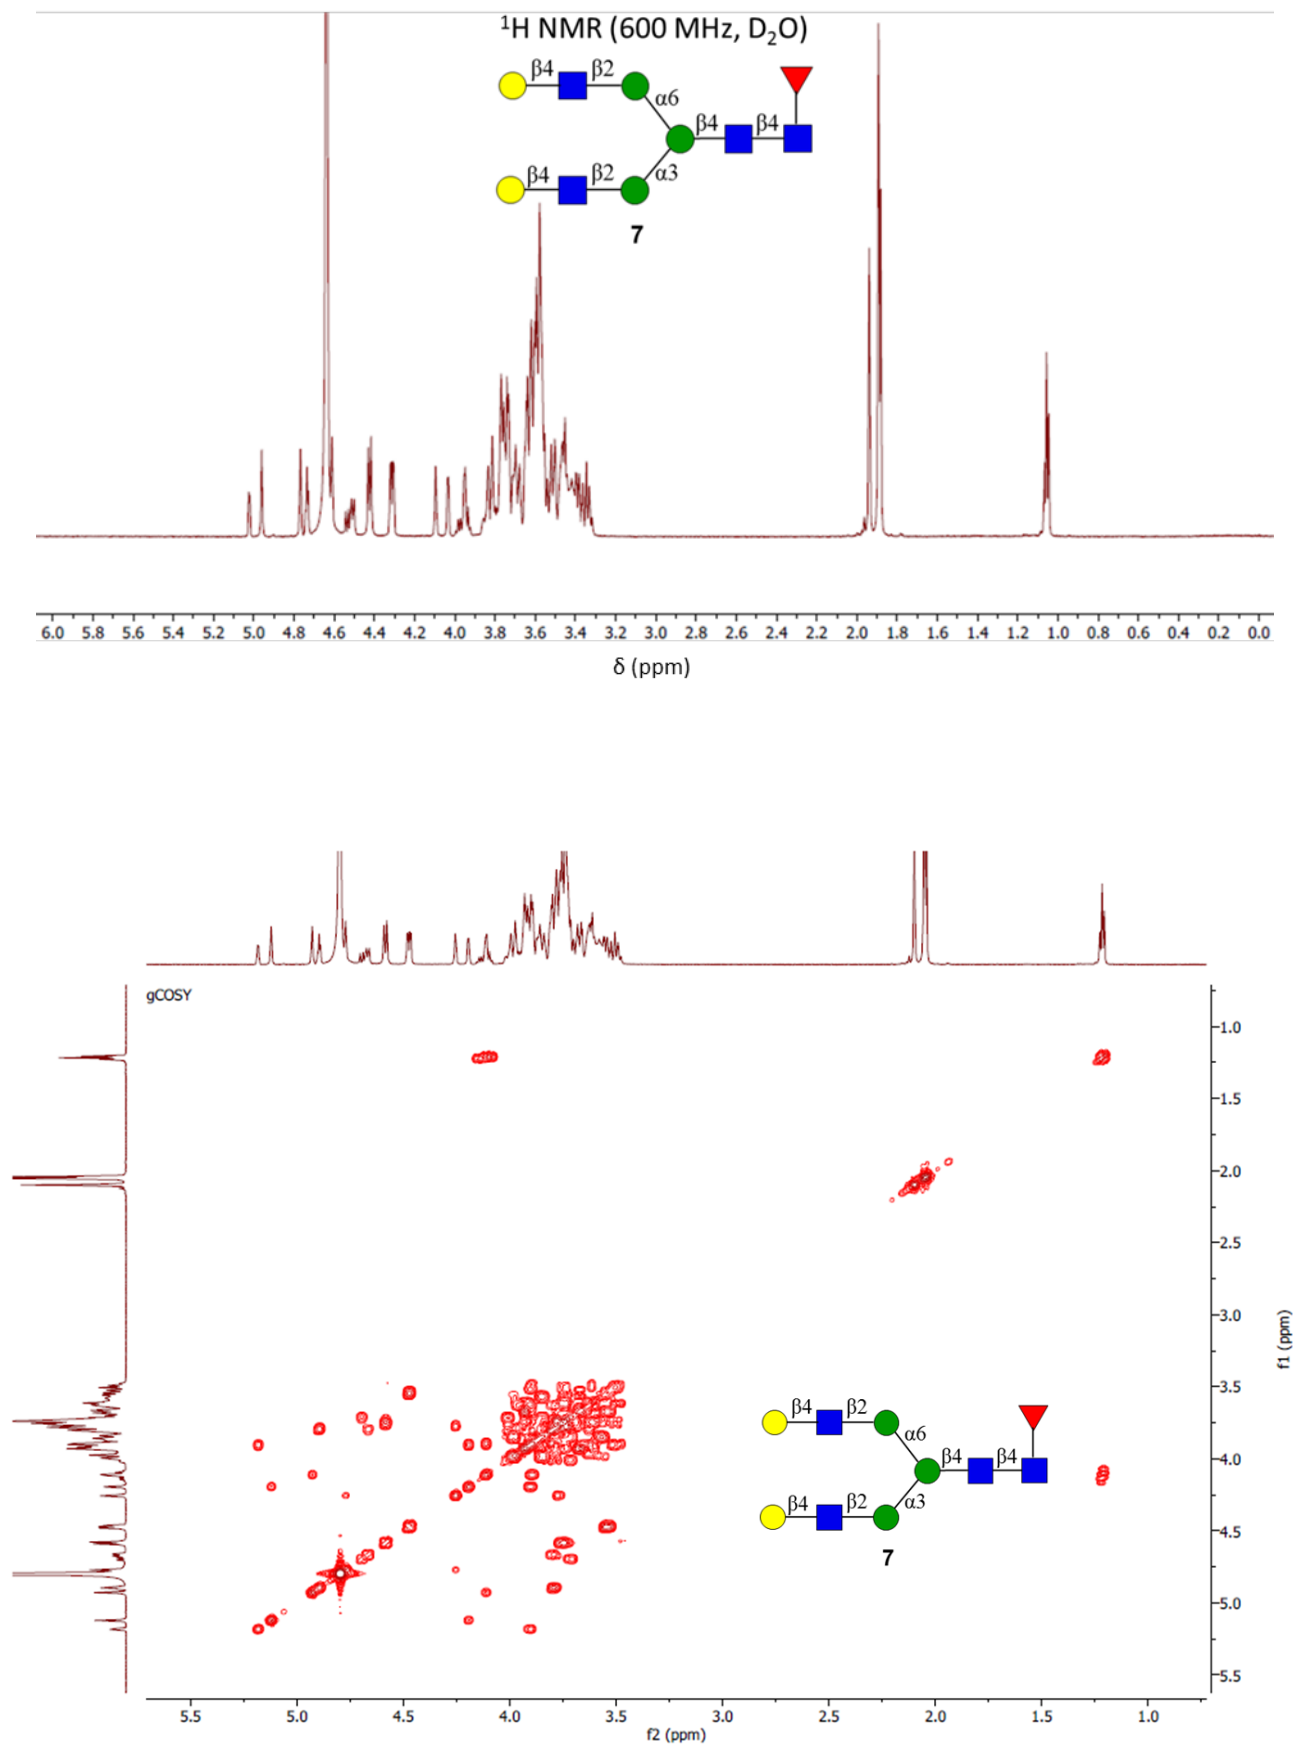

# SUPPORTING INFORMATION

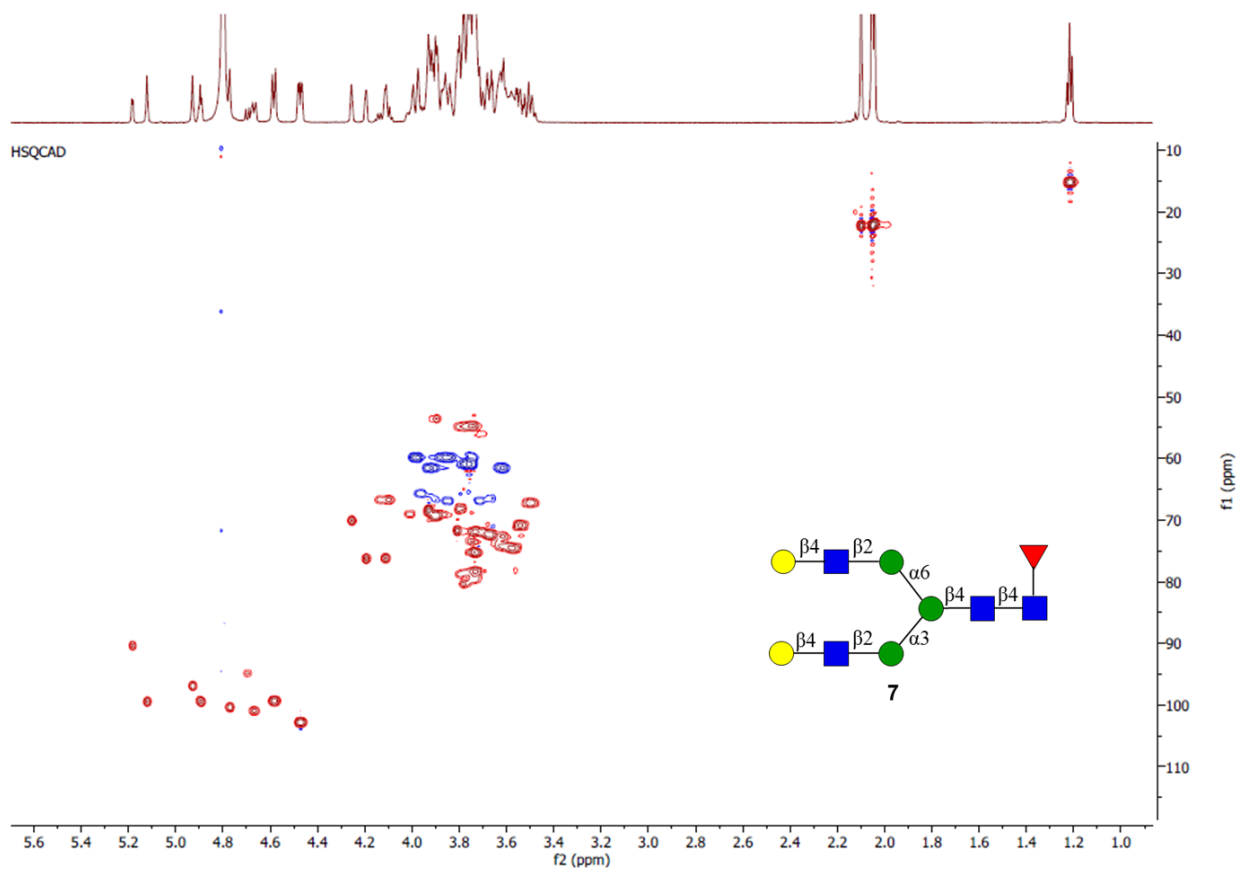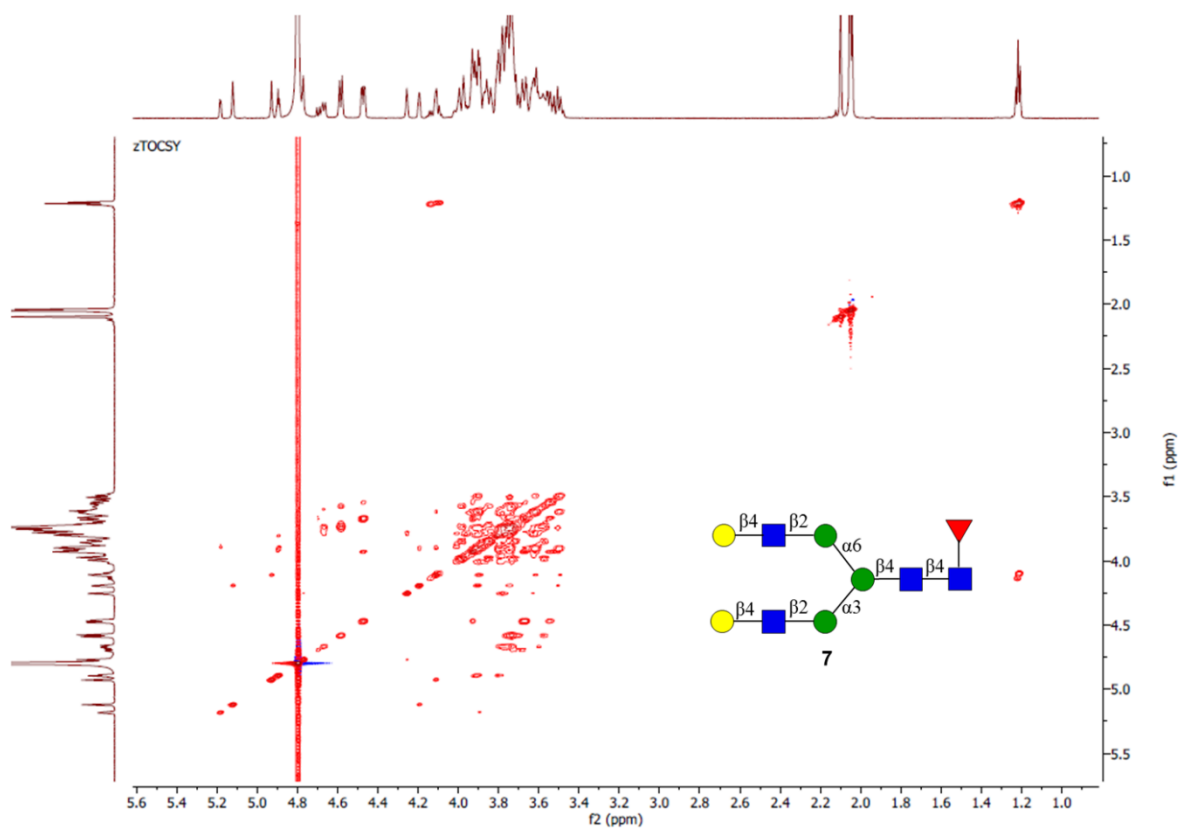

NMR spectra compound 7

# SUPPORTING INFORMATION

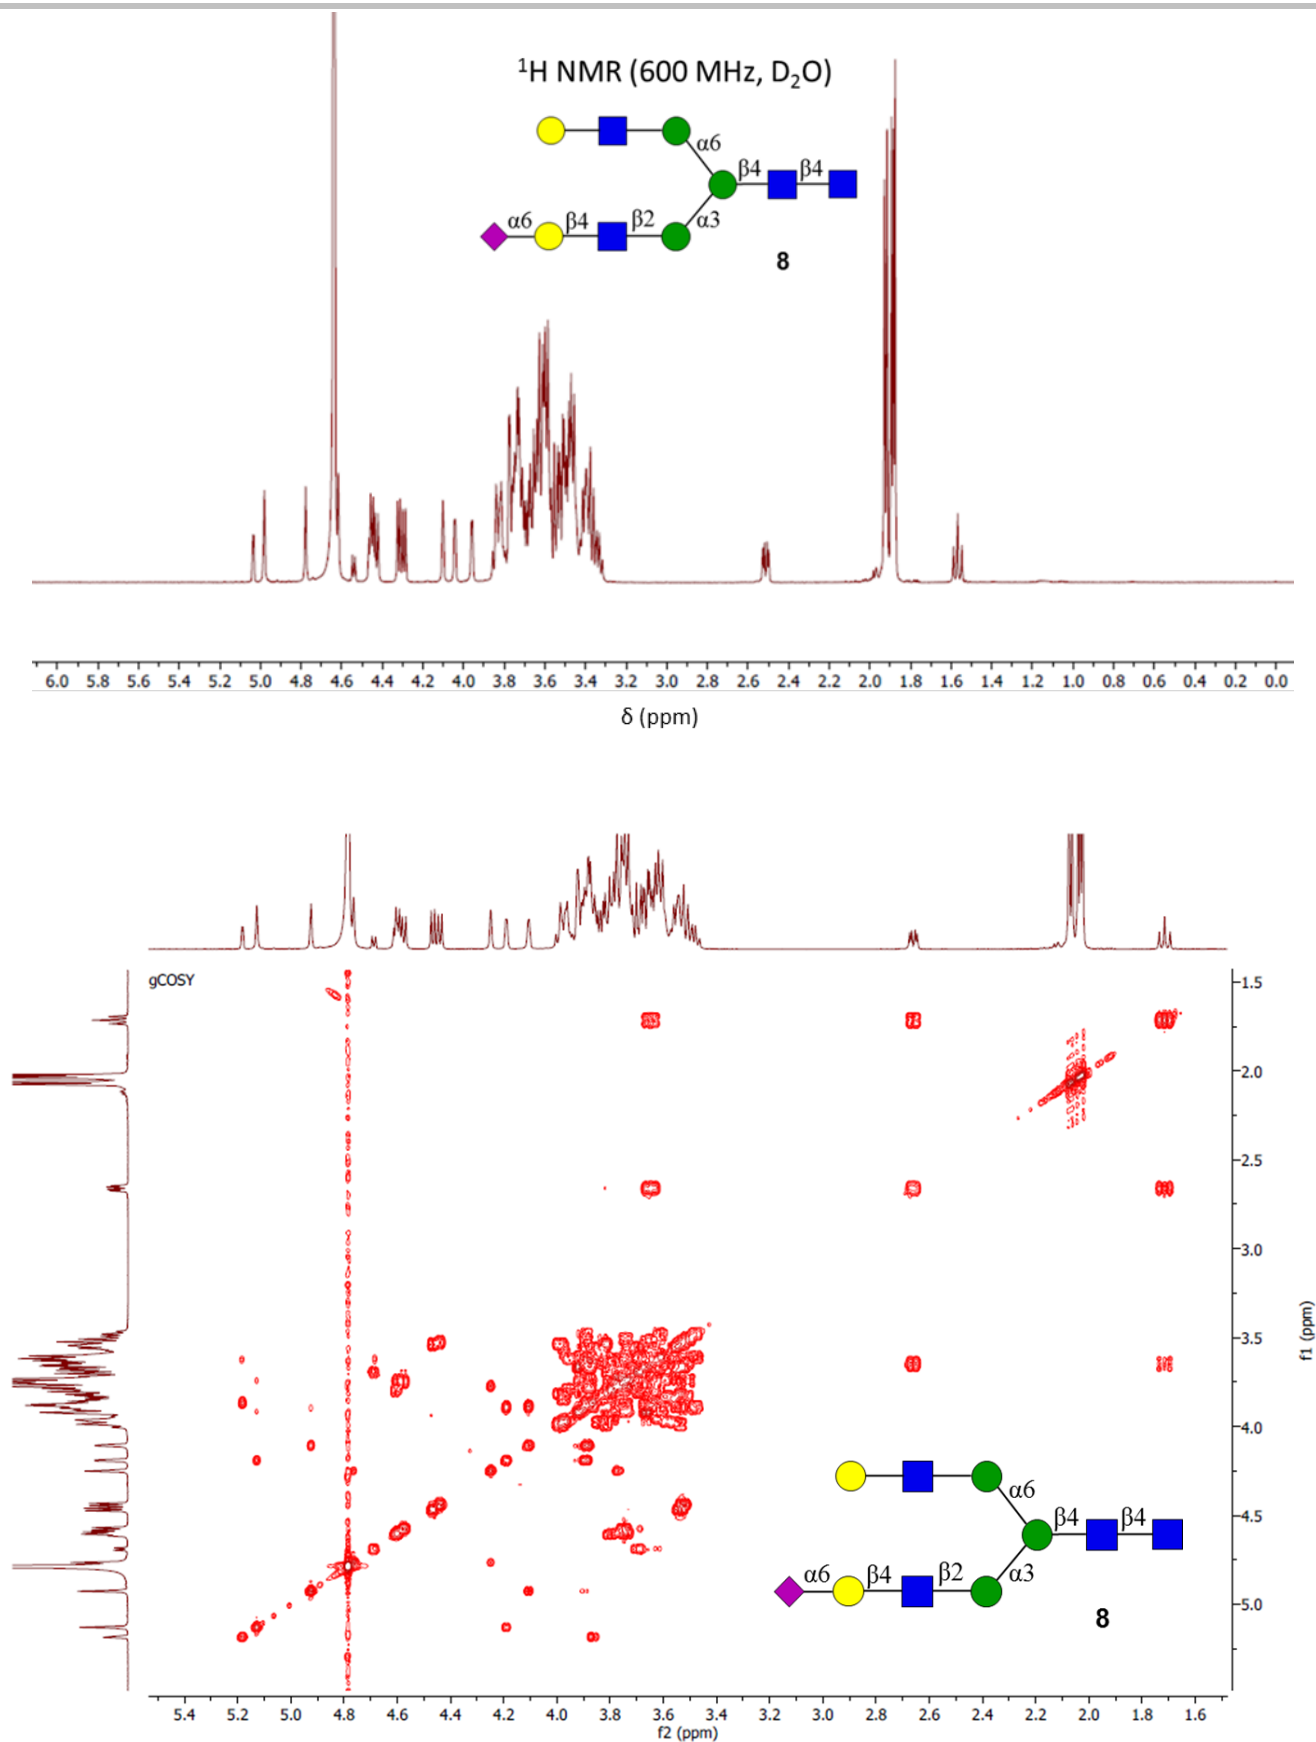

# SUPPORTING INFORMATION

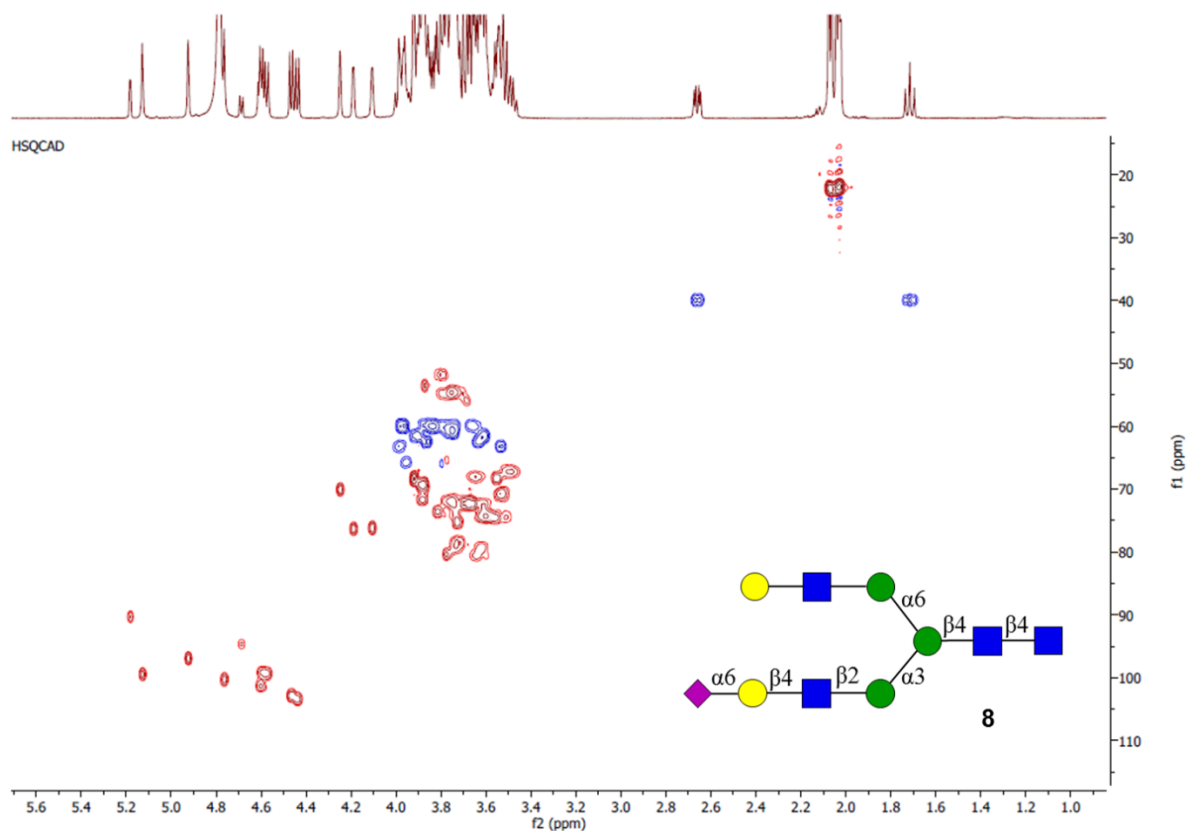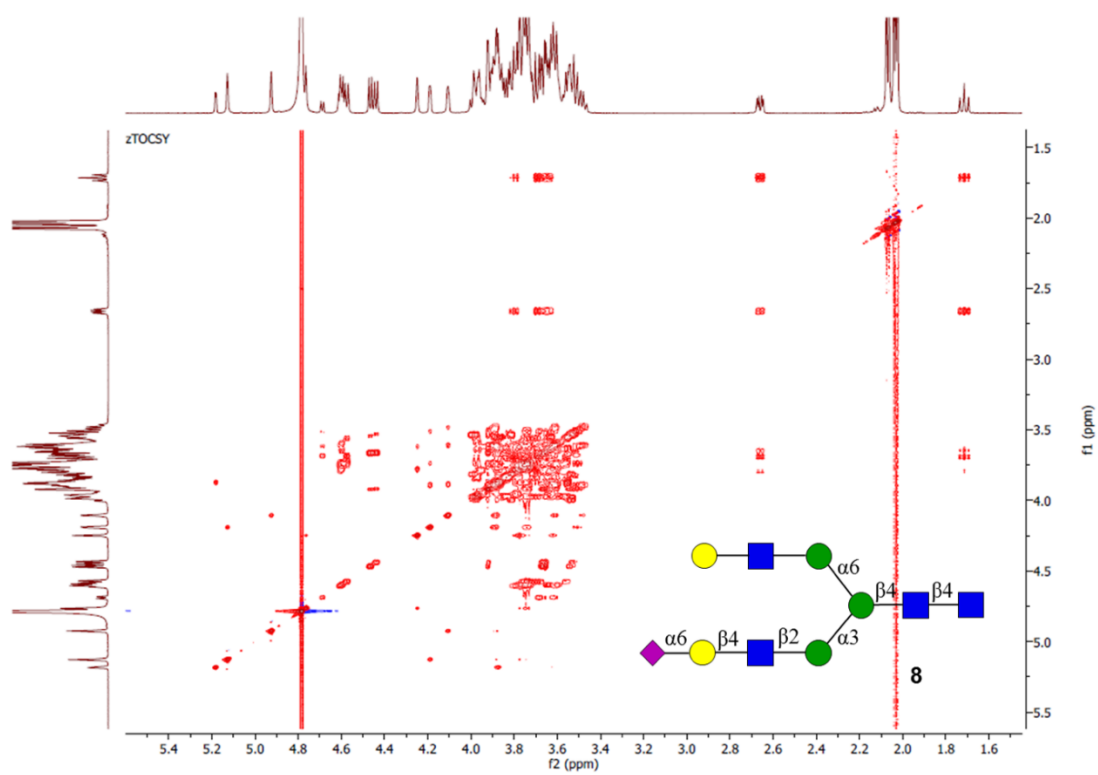

NMR spectra compound 8

# SUPPORTING INFORMATION

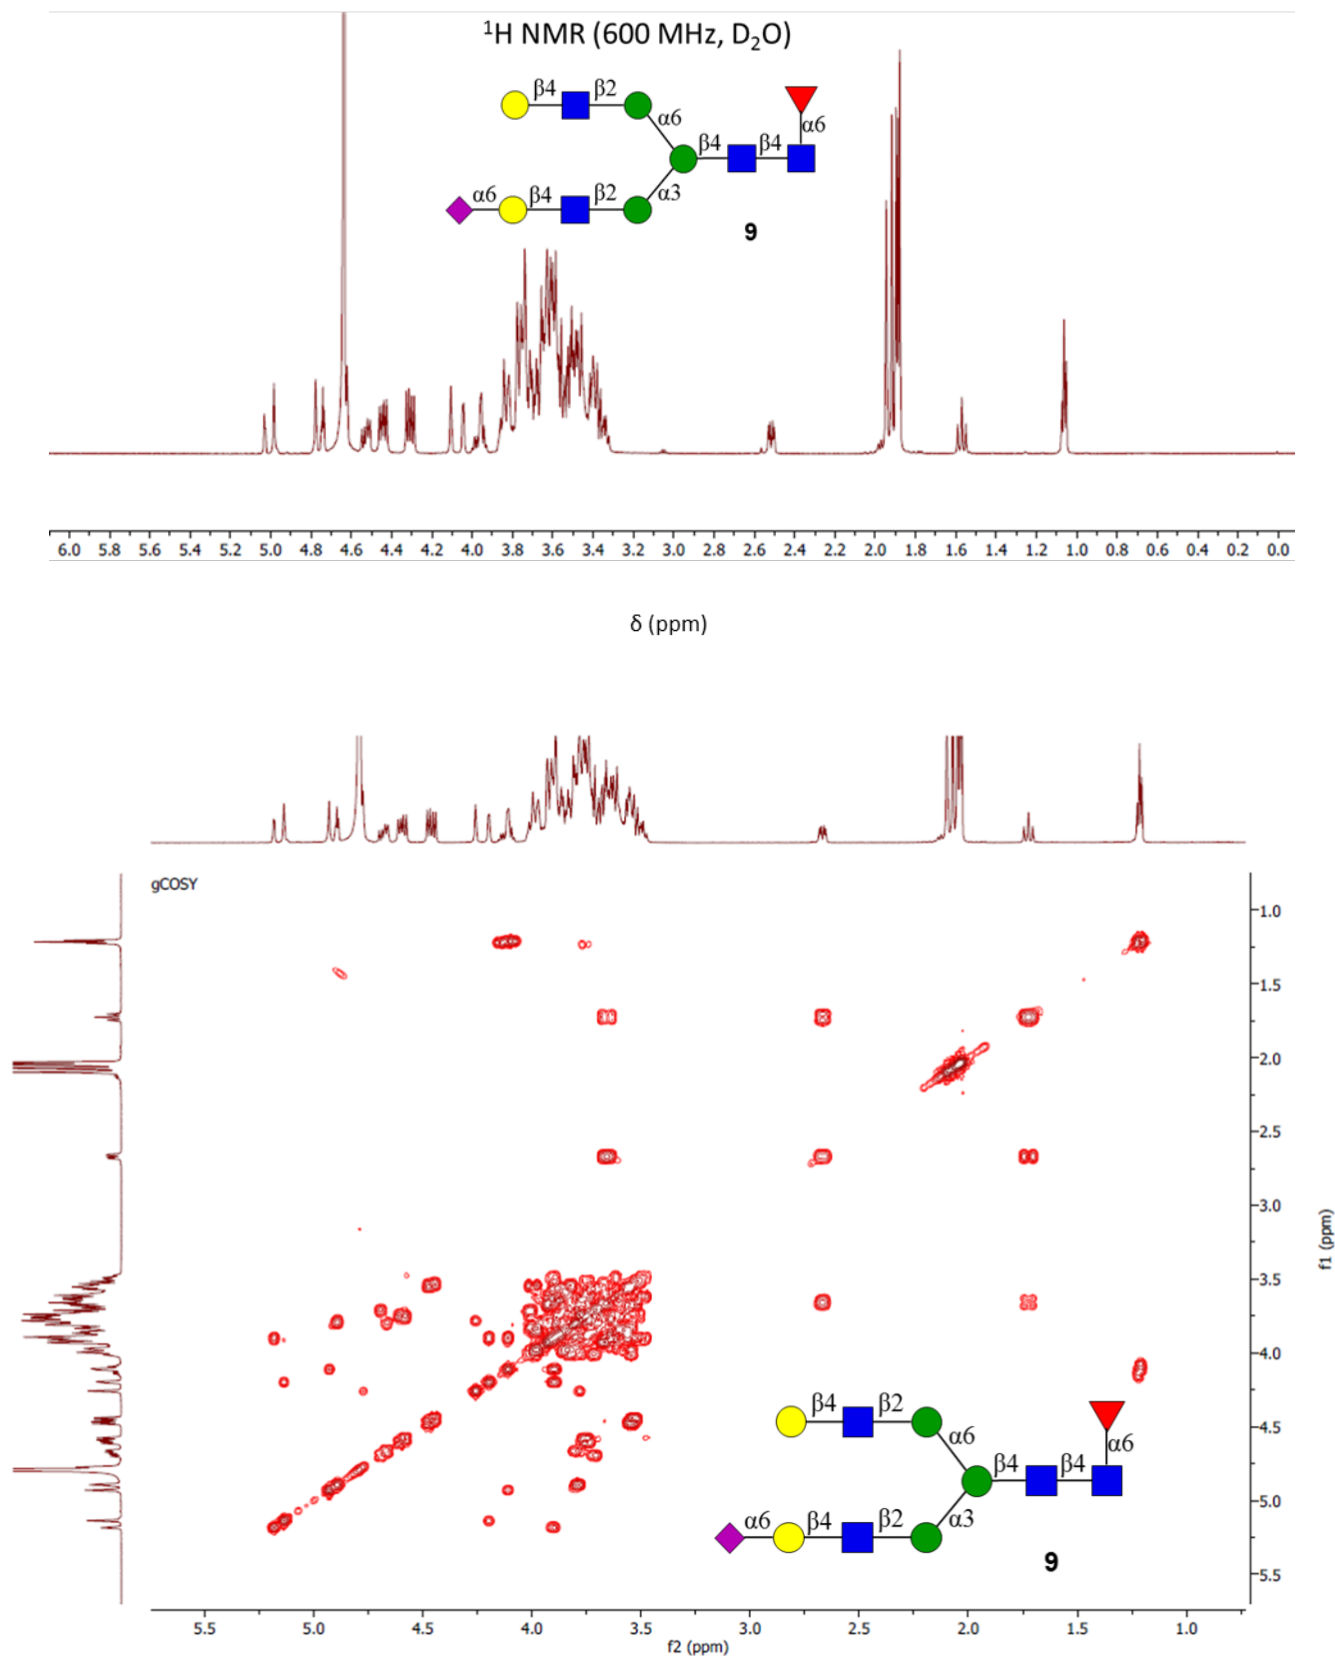

# SUPPORTING INFORMATION

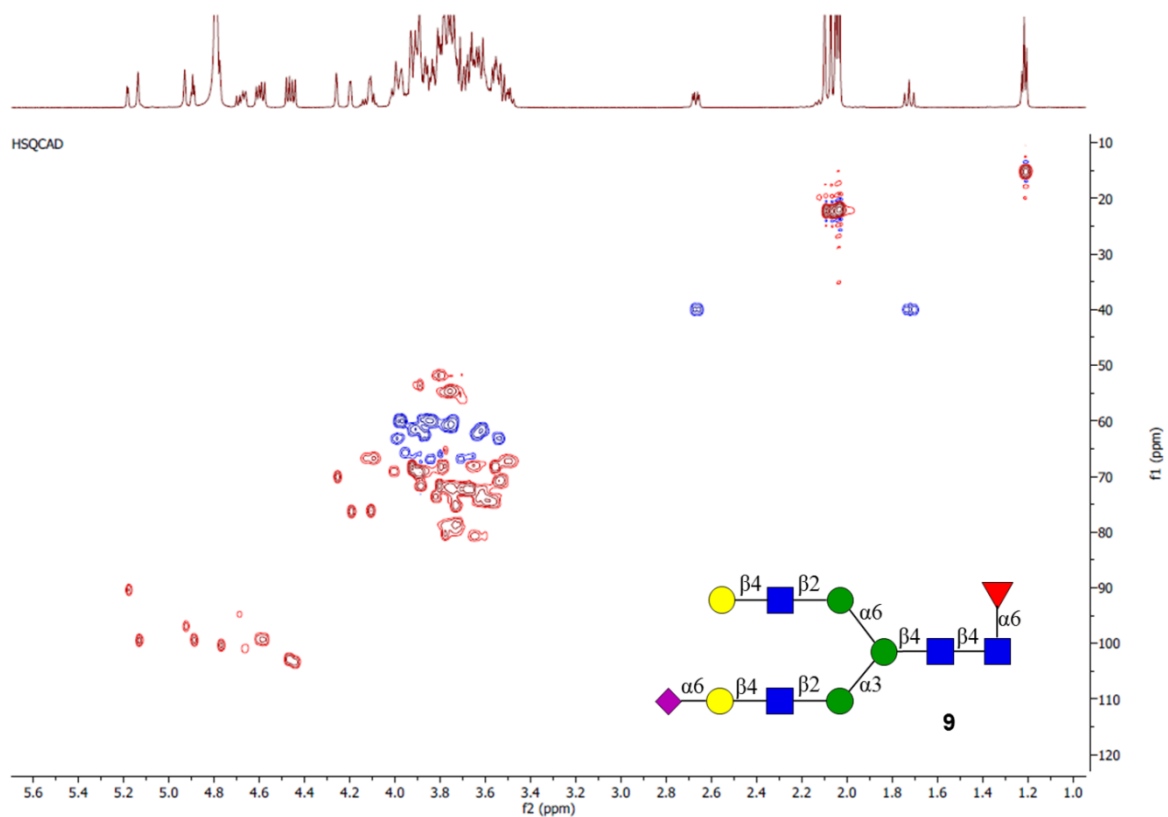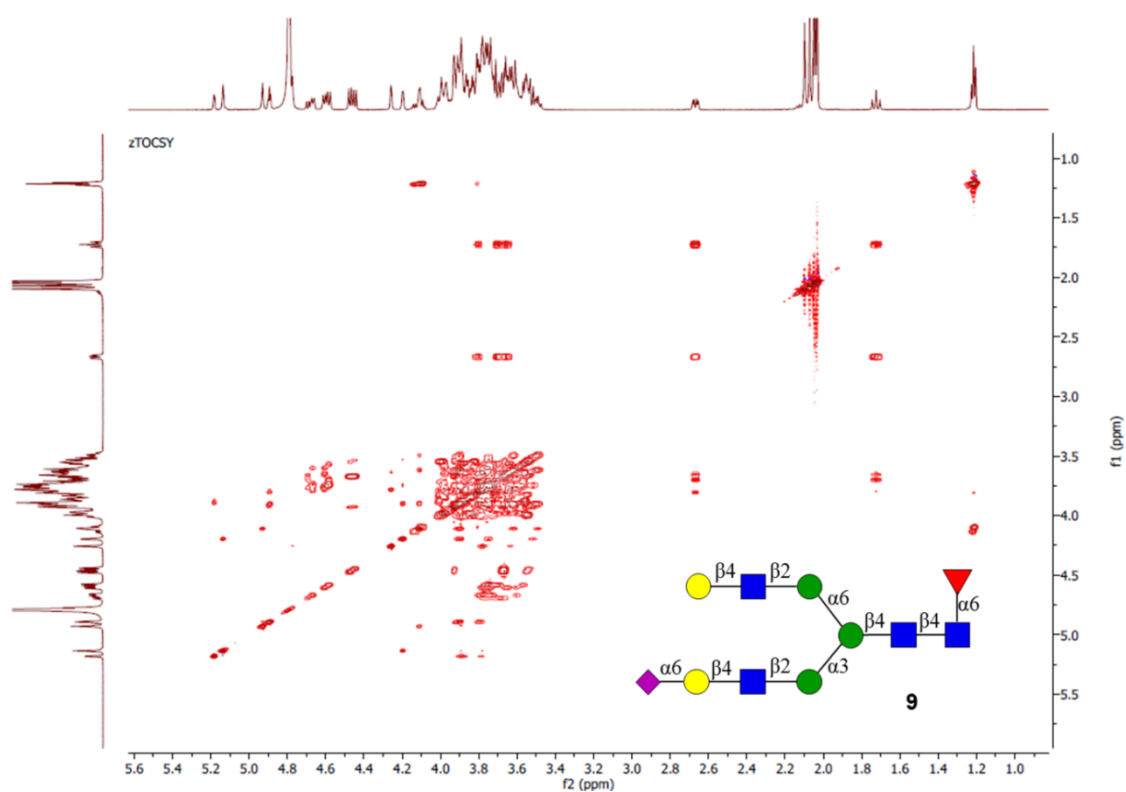

NMR spectra compound 9



# SUPPORTING INFORMATION

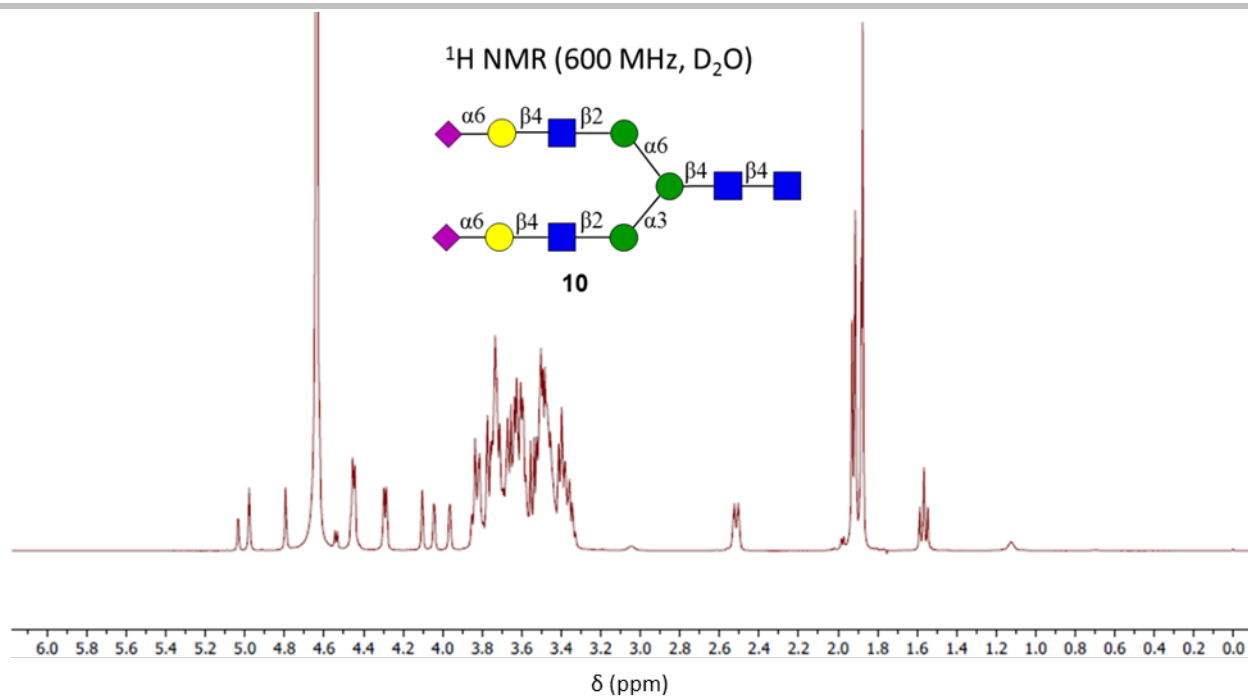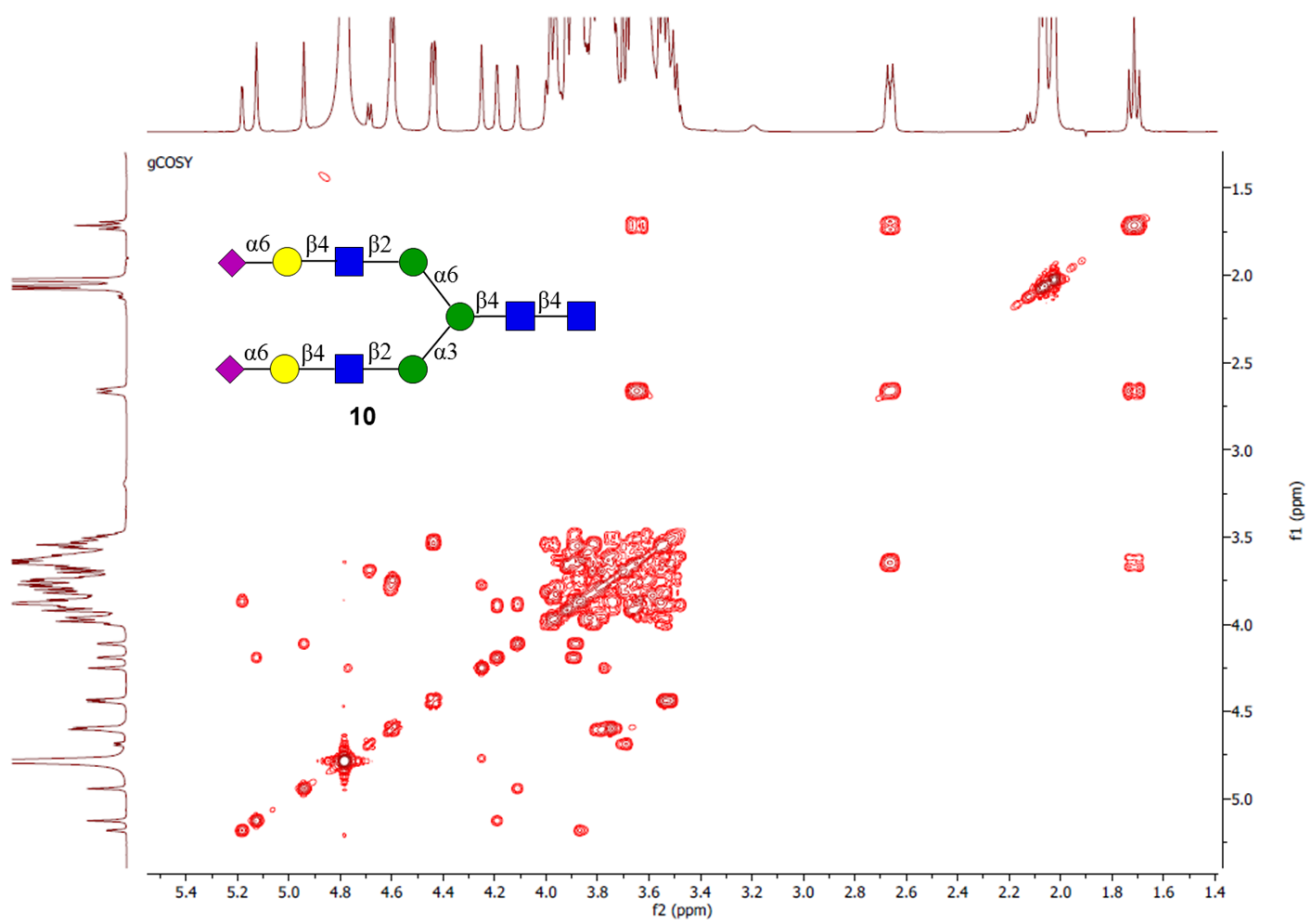

# SUPPORTING INFORMATION

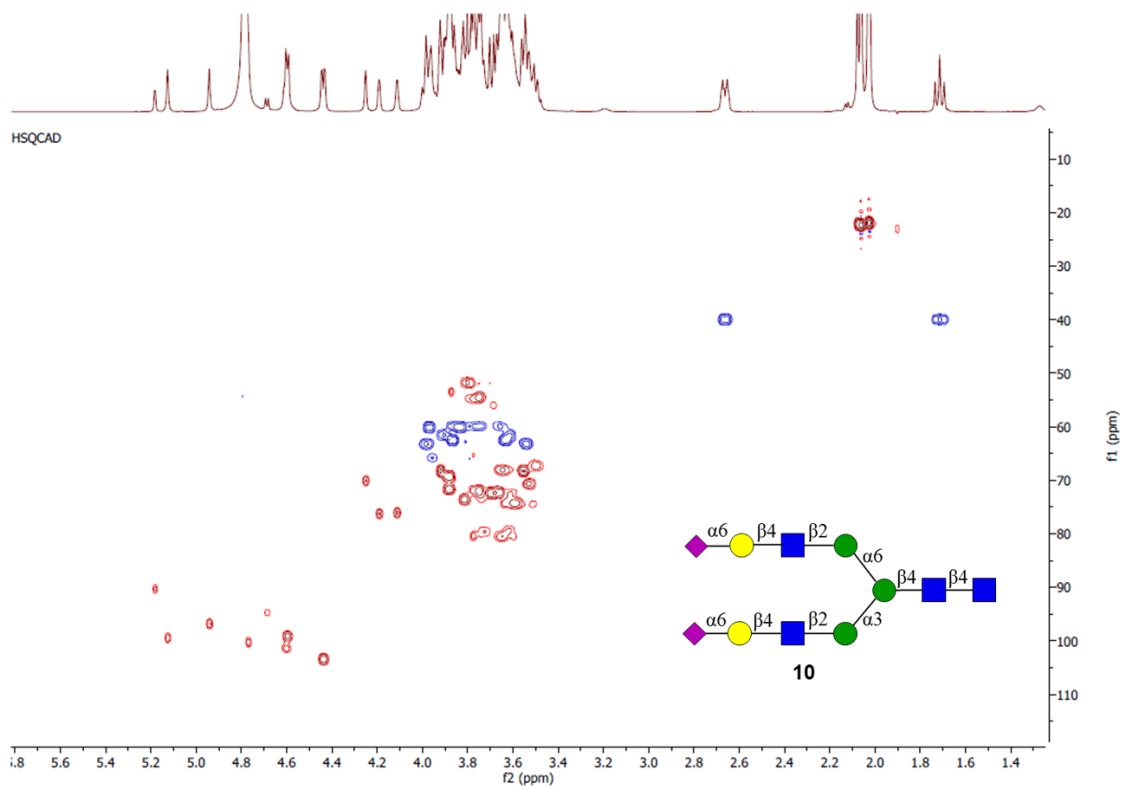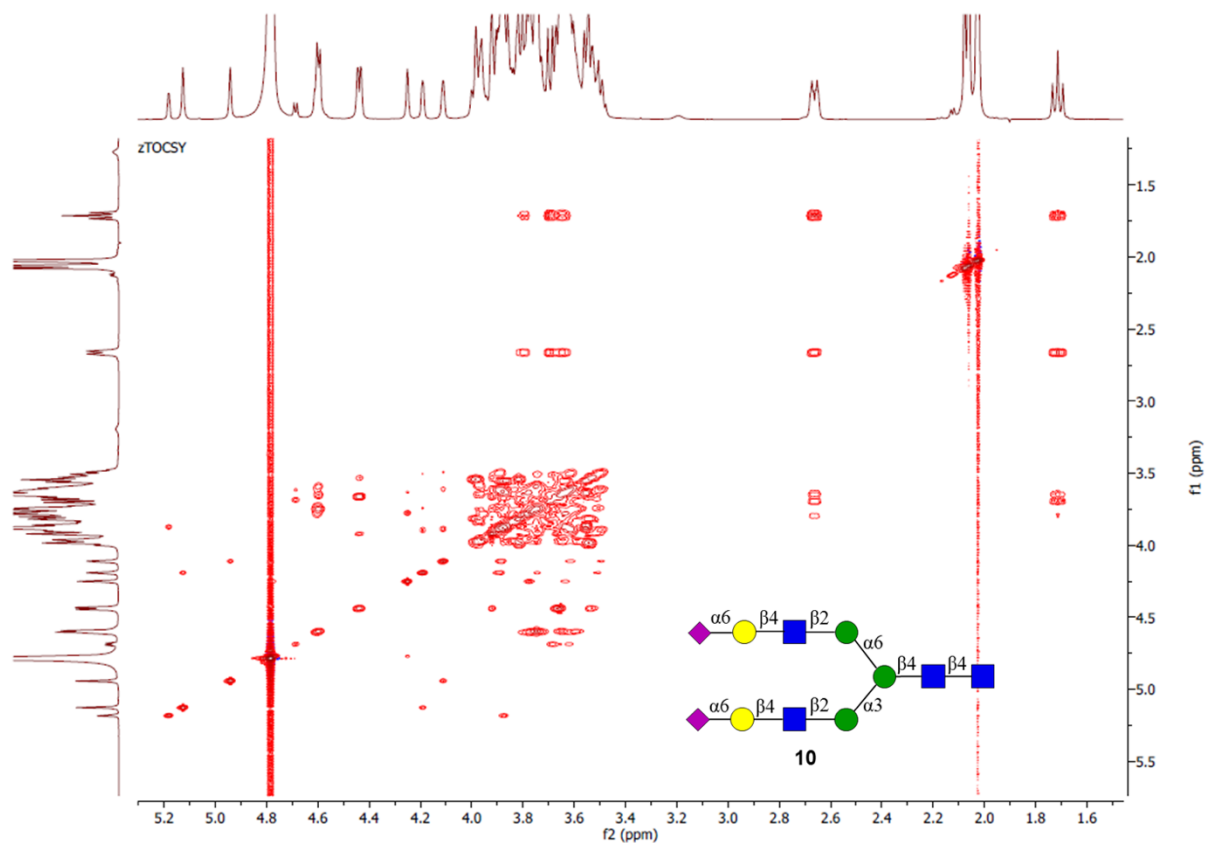

NMR spectra compound 10

# SUPPORTING INFORMATION

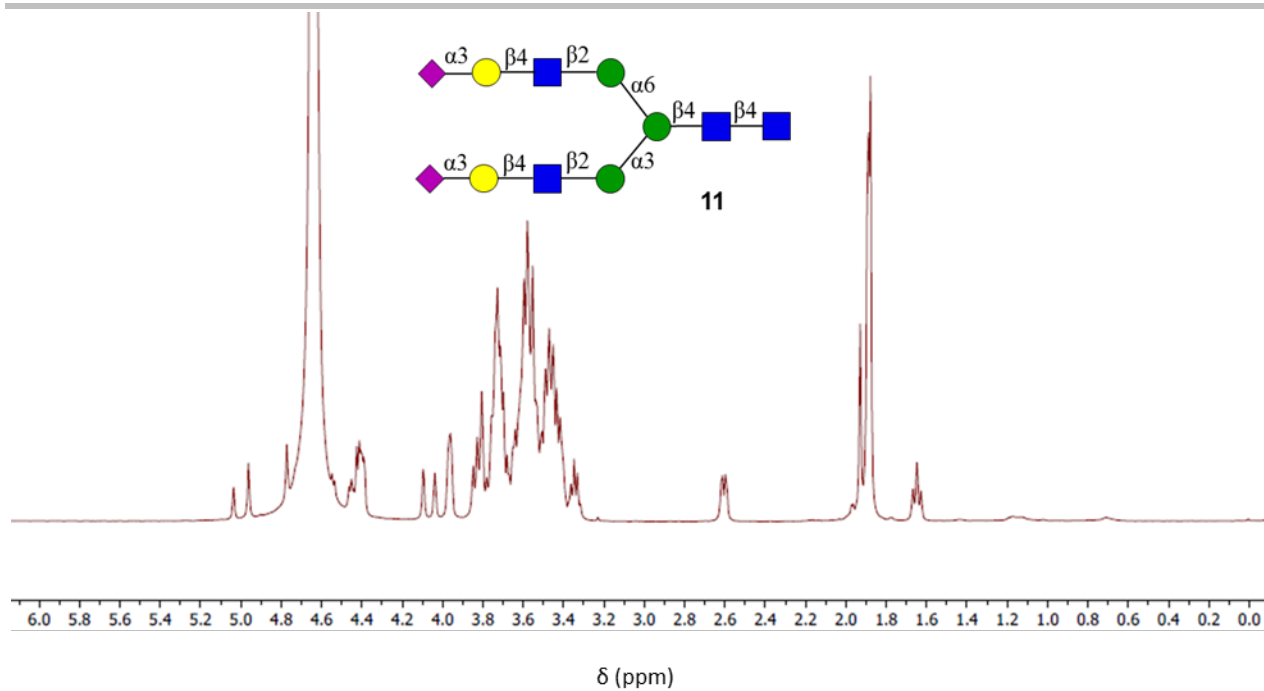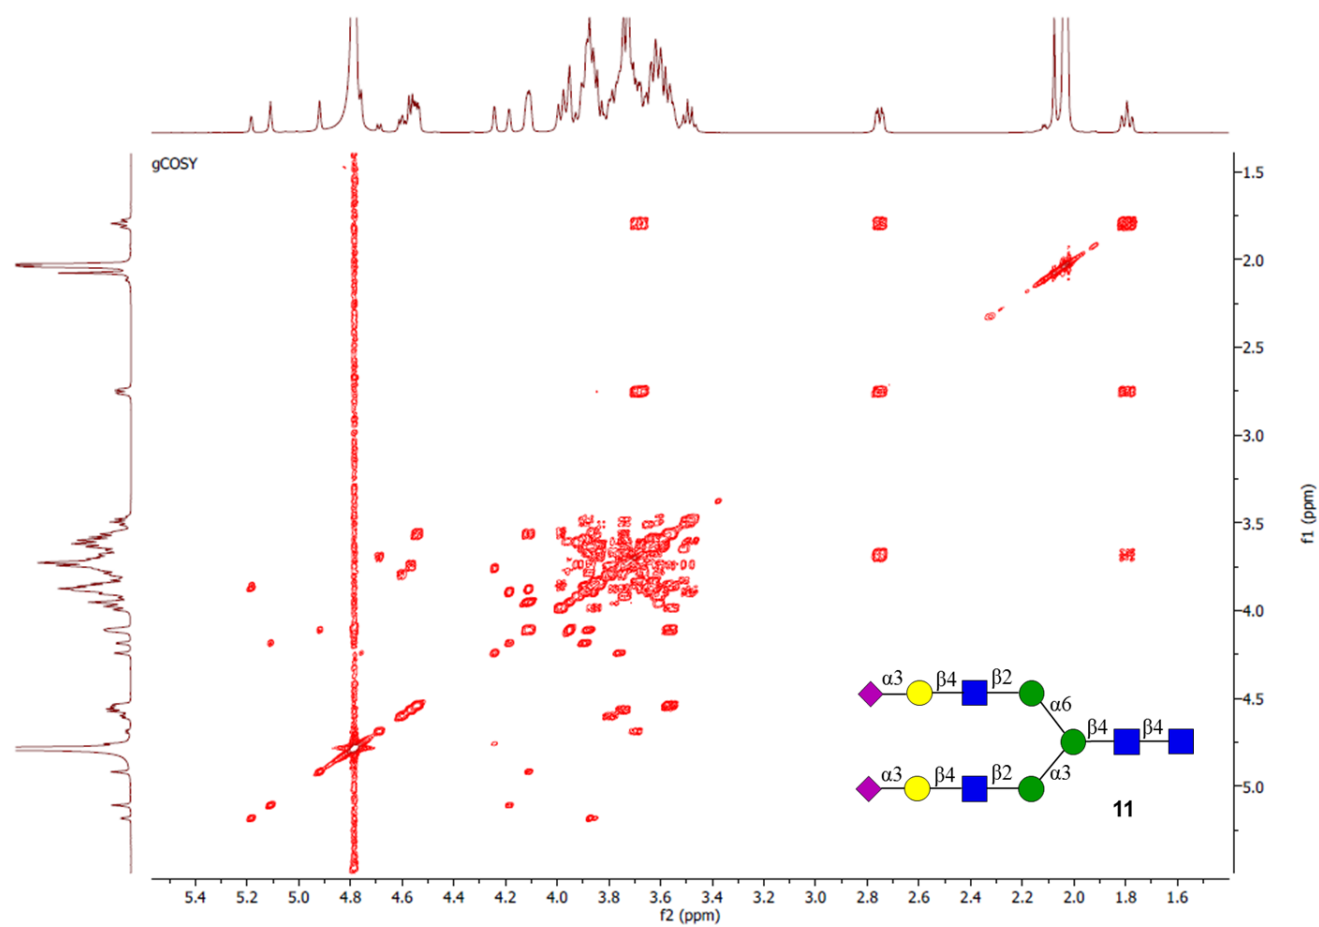

# SUPPORTING INFORMATION

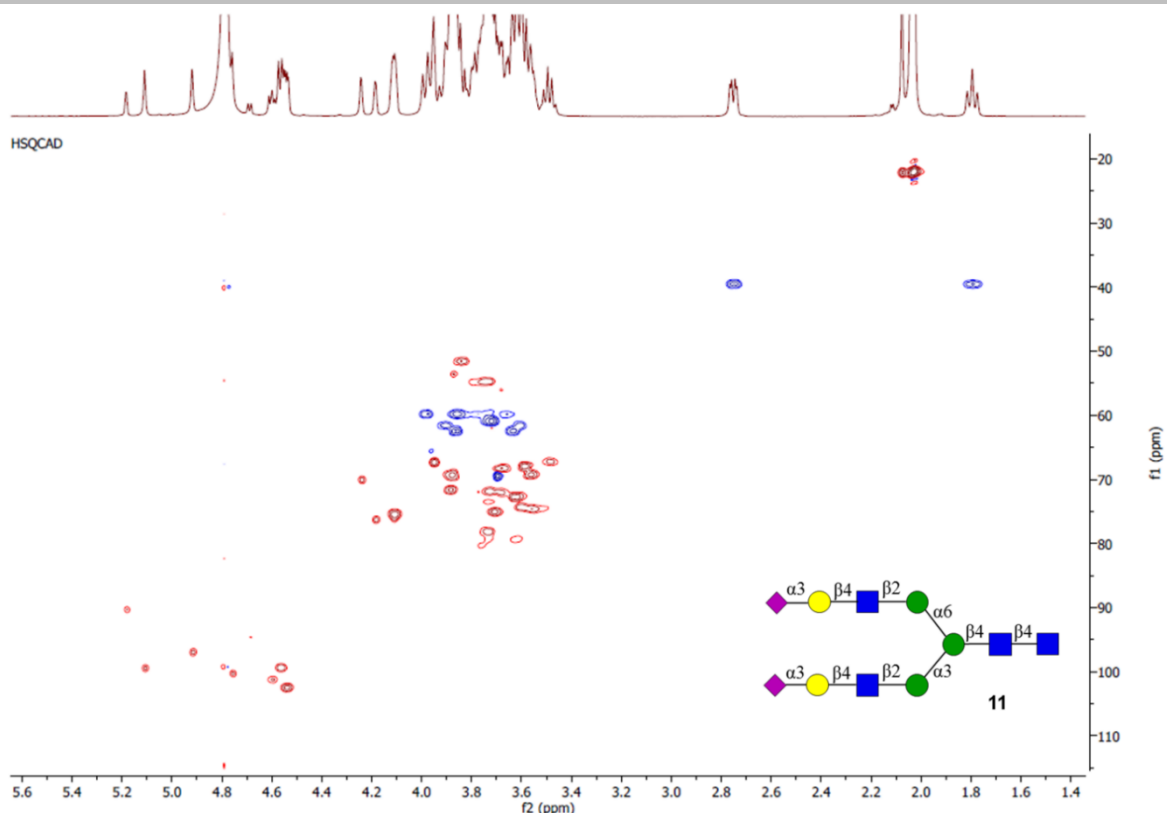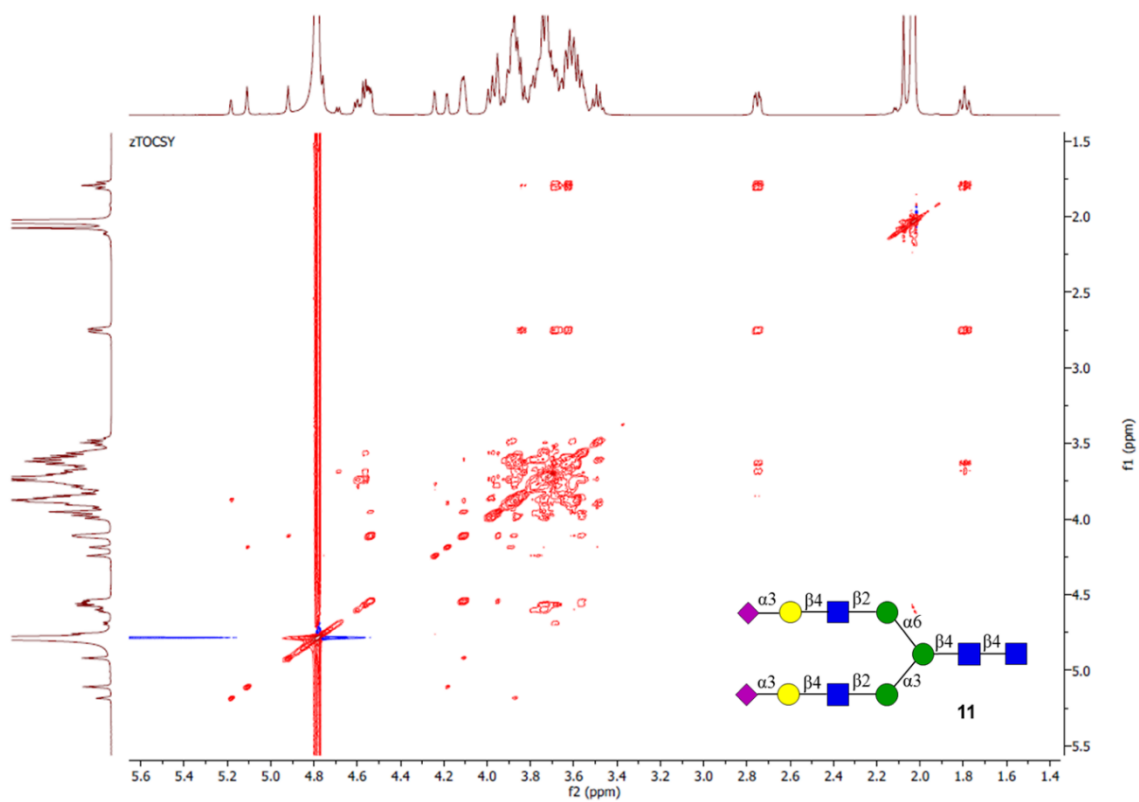

NMR spectra compound 11

# SUPPORTING INFORMATION

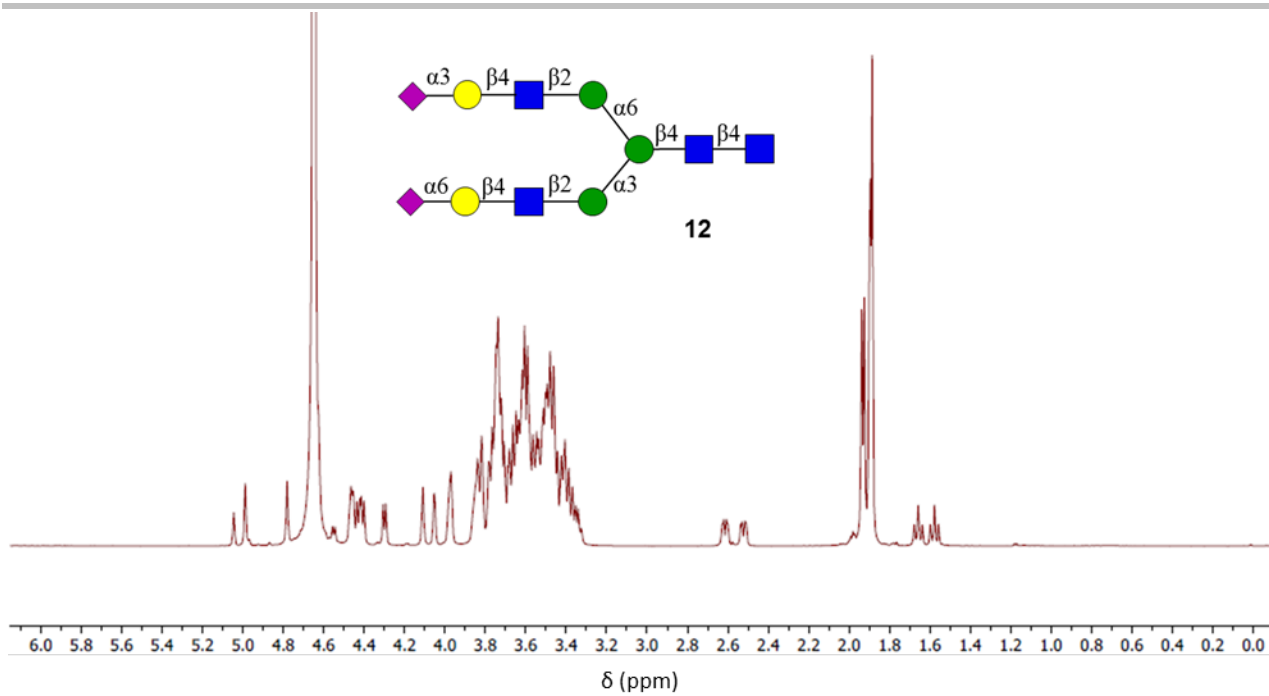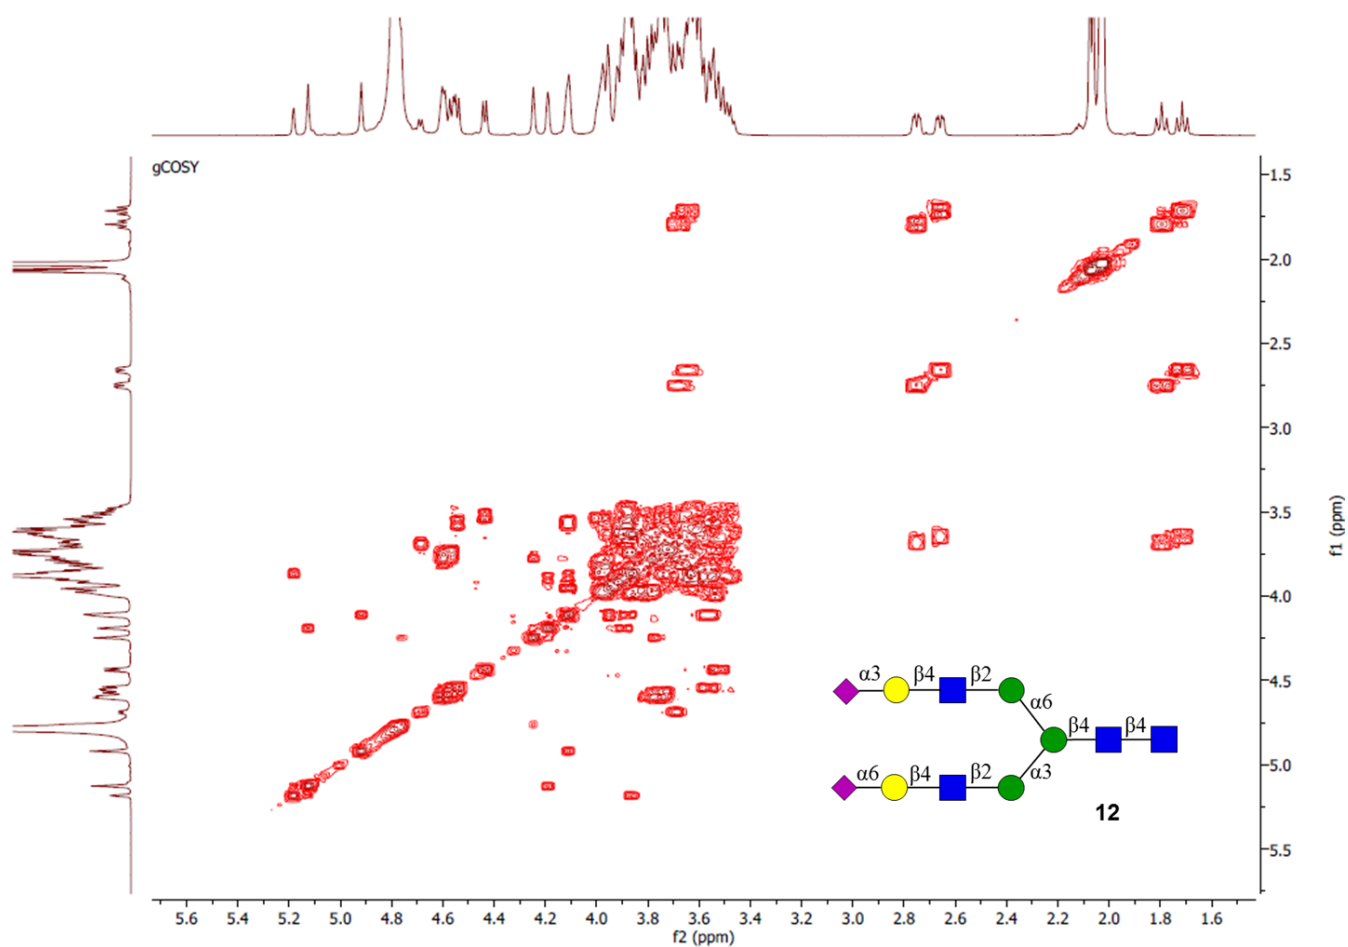

# SUPPORTING INFORMATION

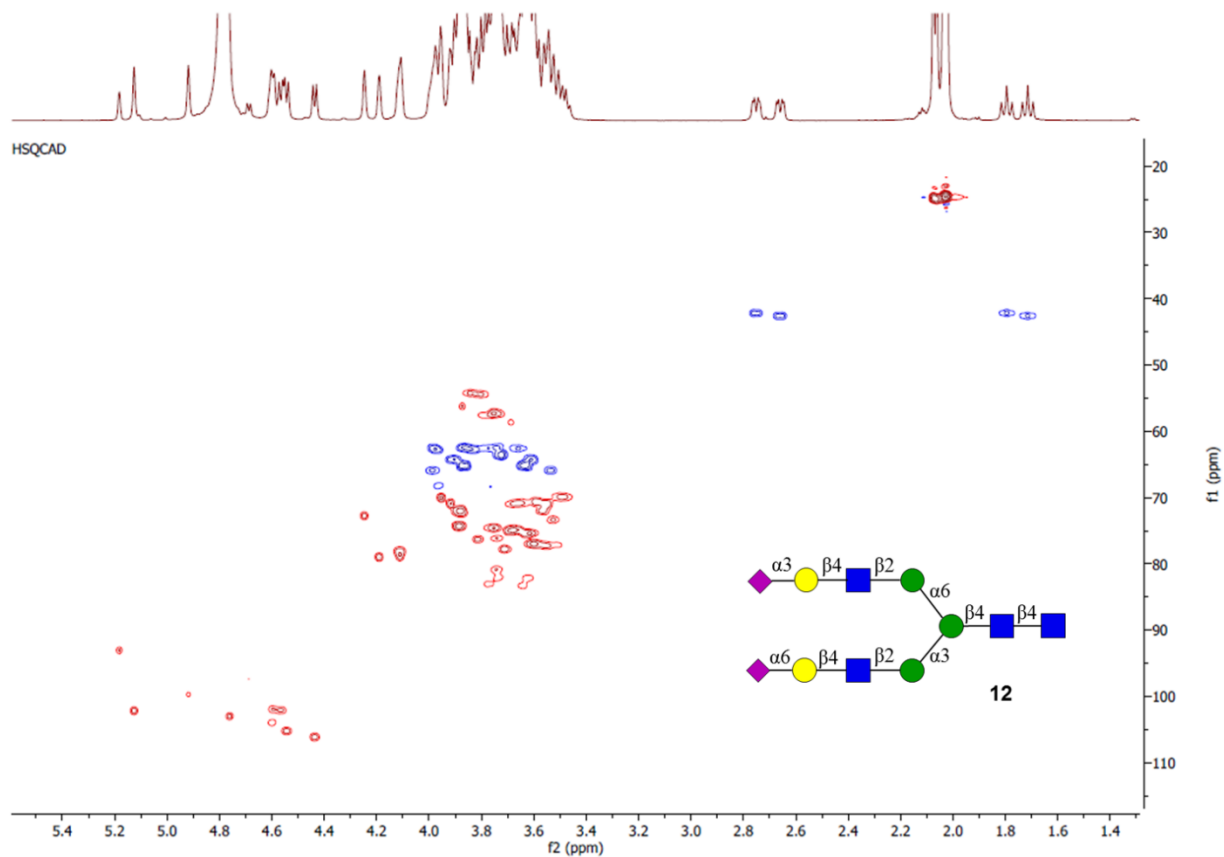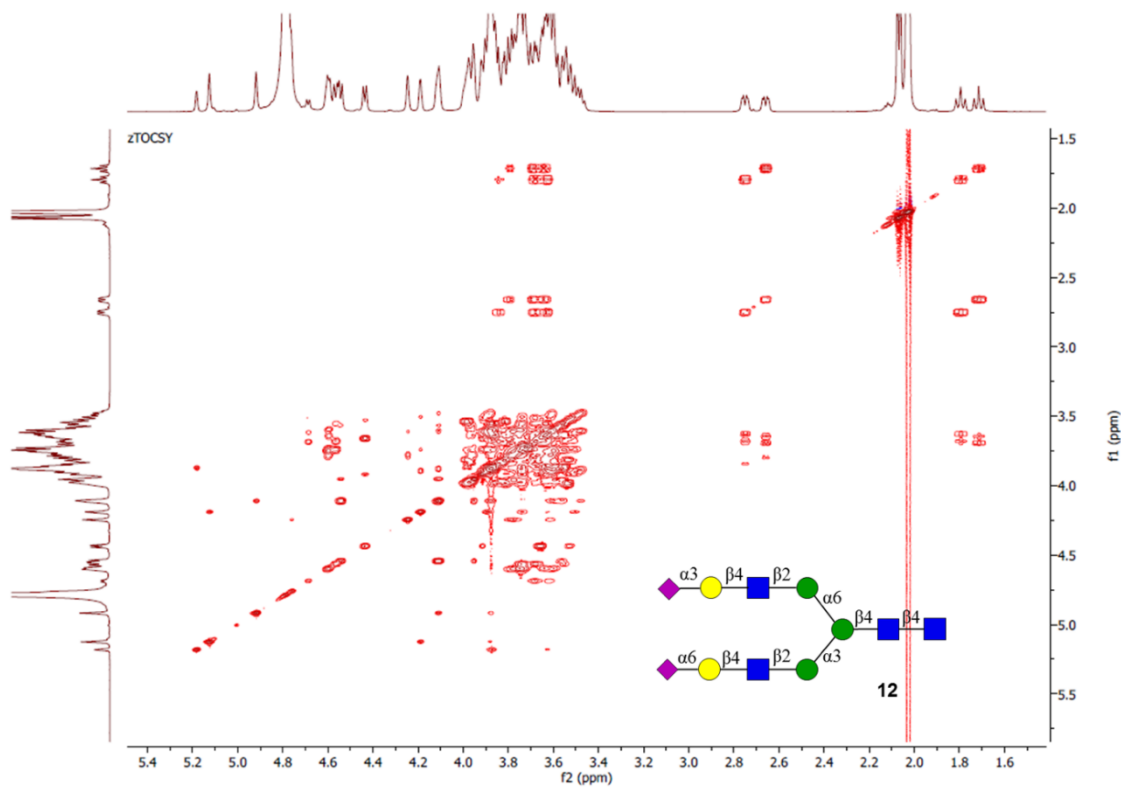

NMR spectra compound 12

# SUPPORTING INFORMATION

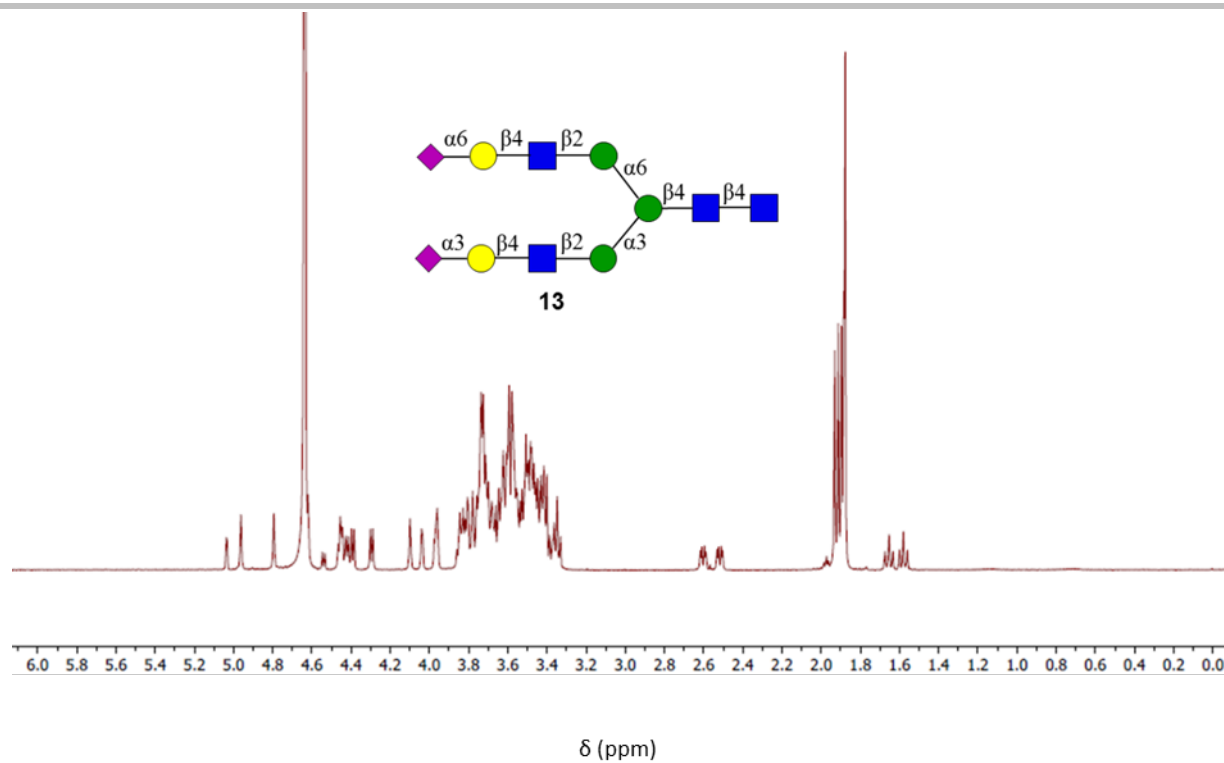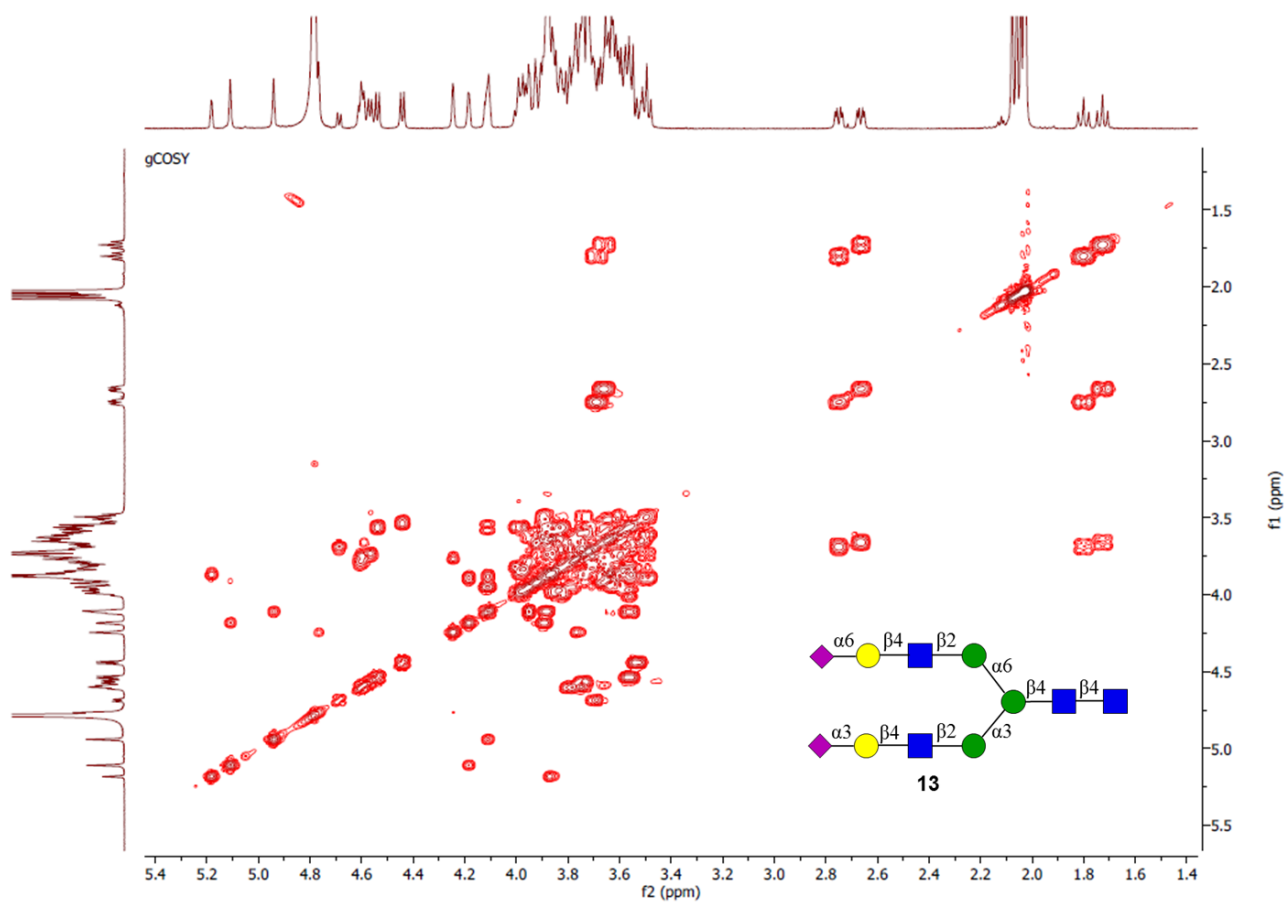

# SUPPORTING INFORMATION

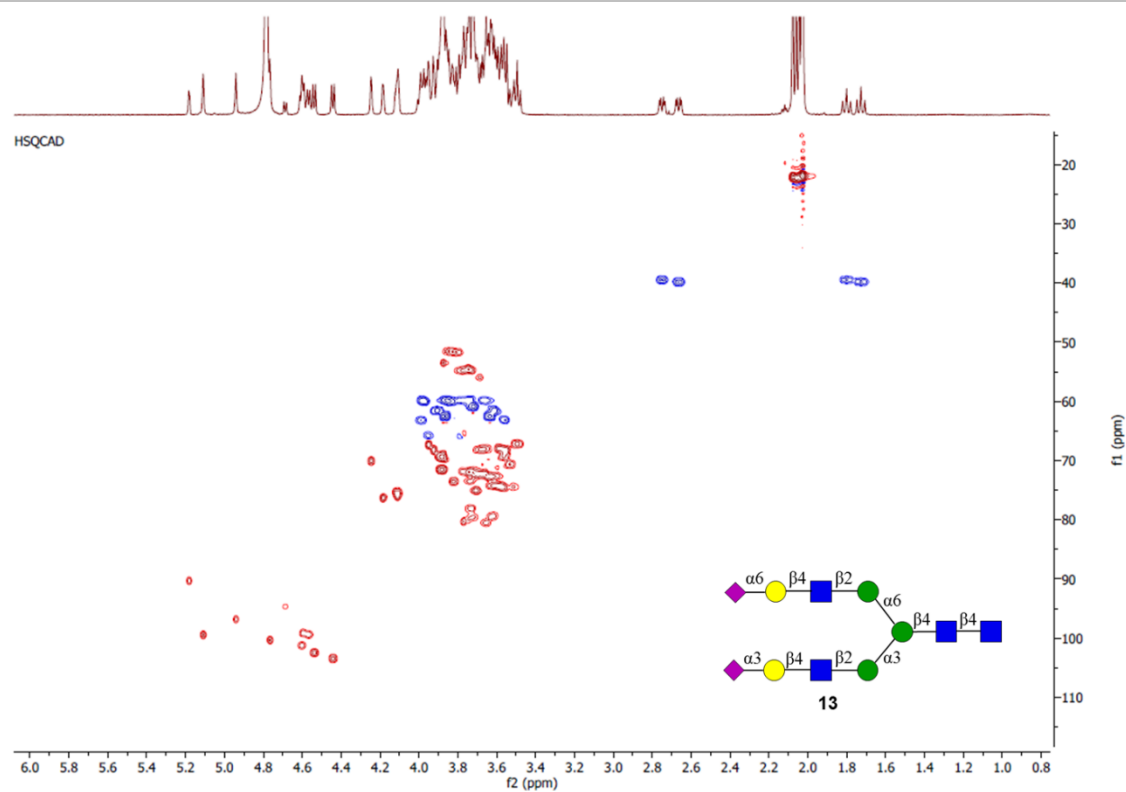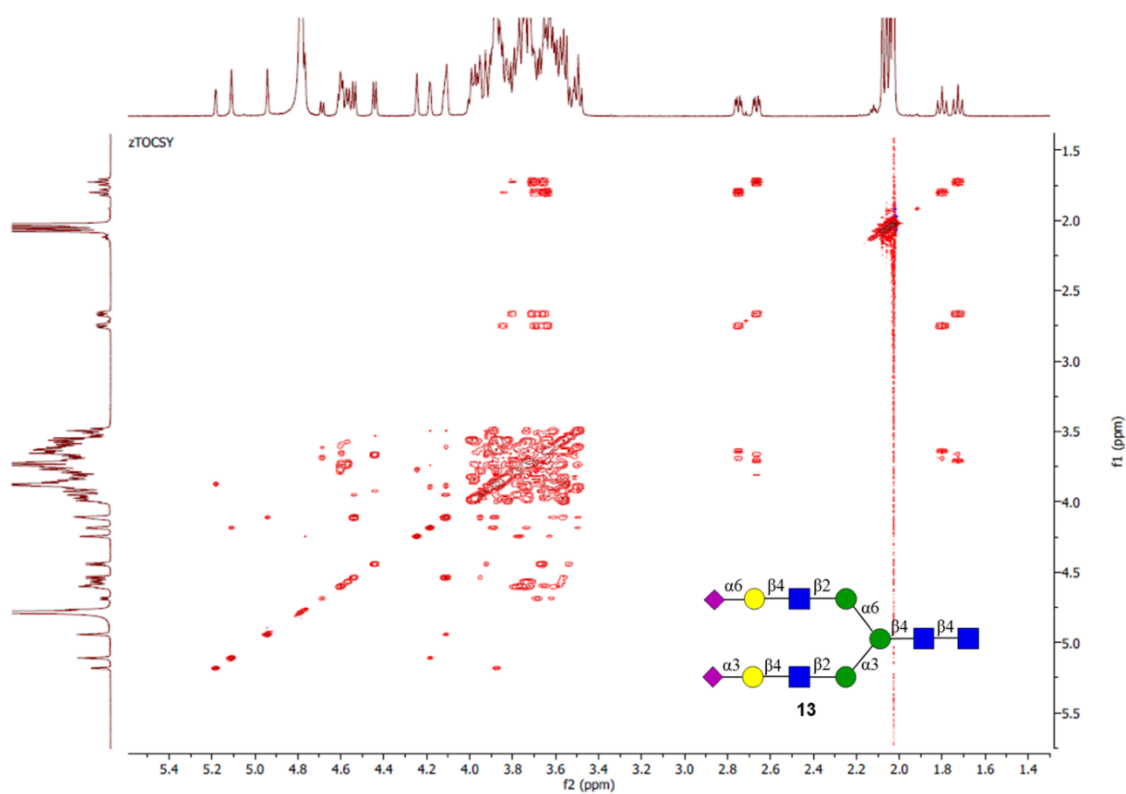

NMR spectra compound 13



# SUPPORTING INFORMATION

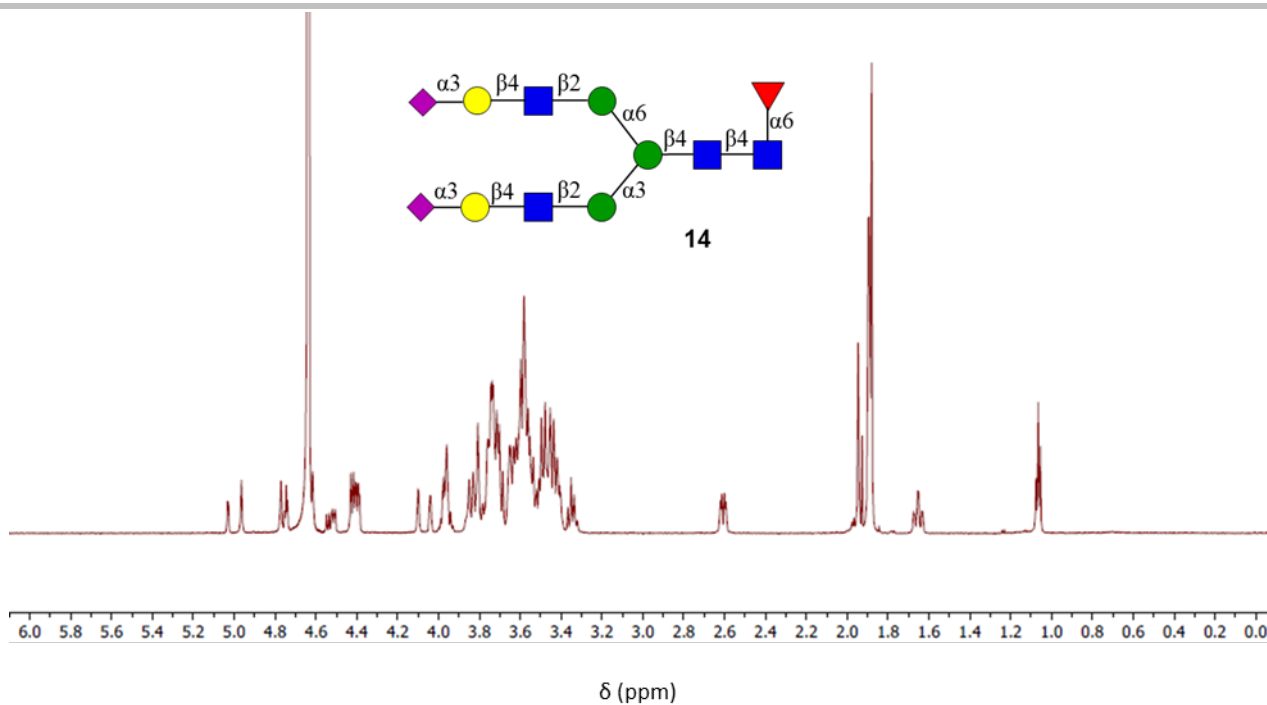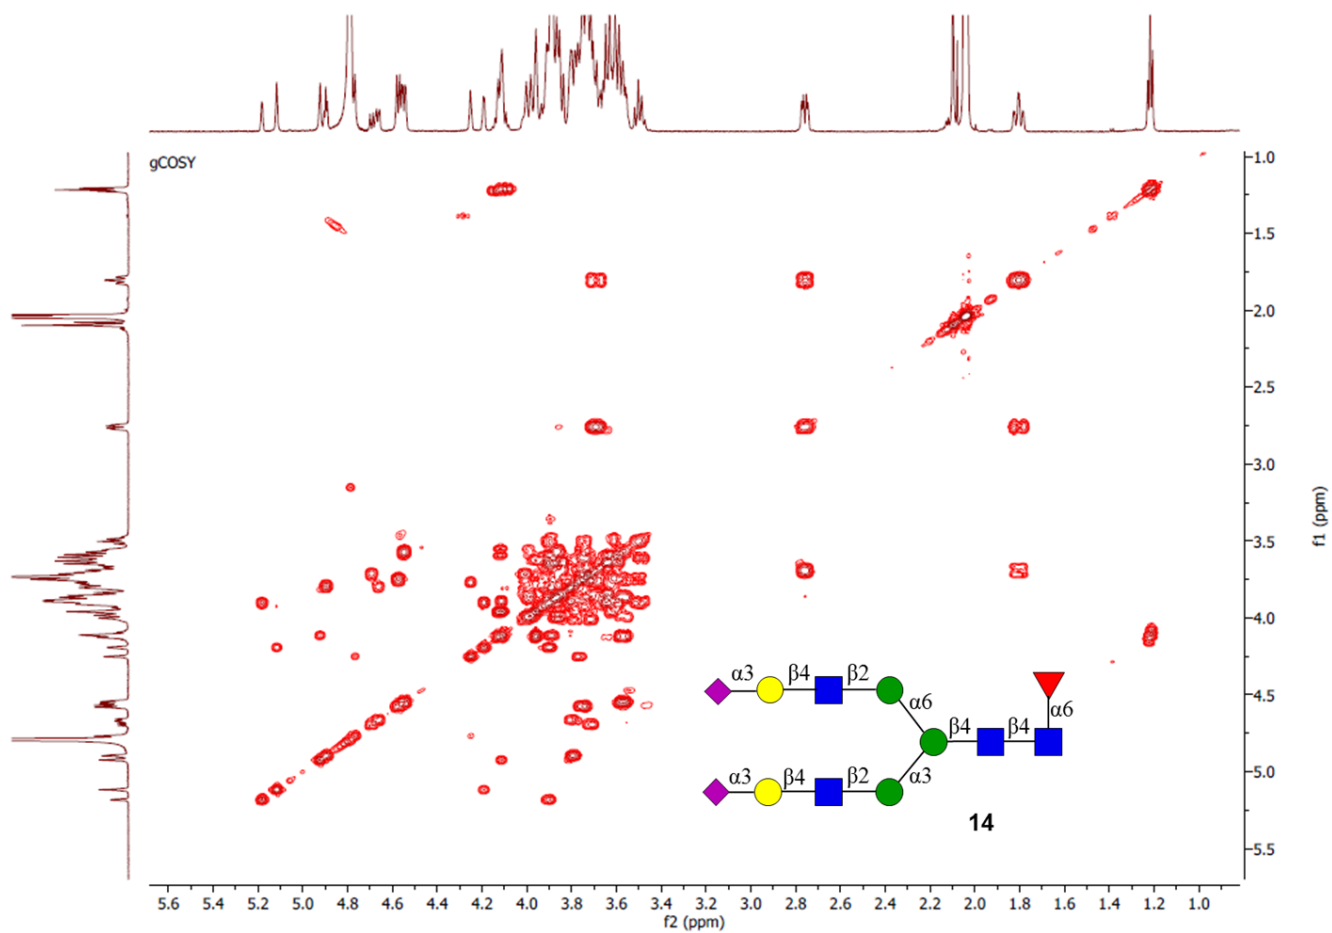

# SUPPORTING INFORMATION

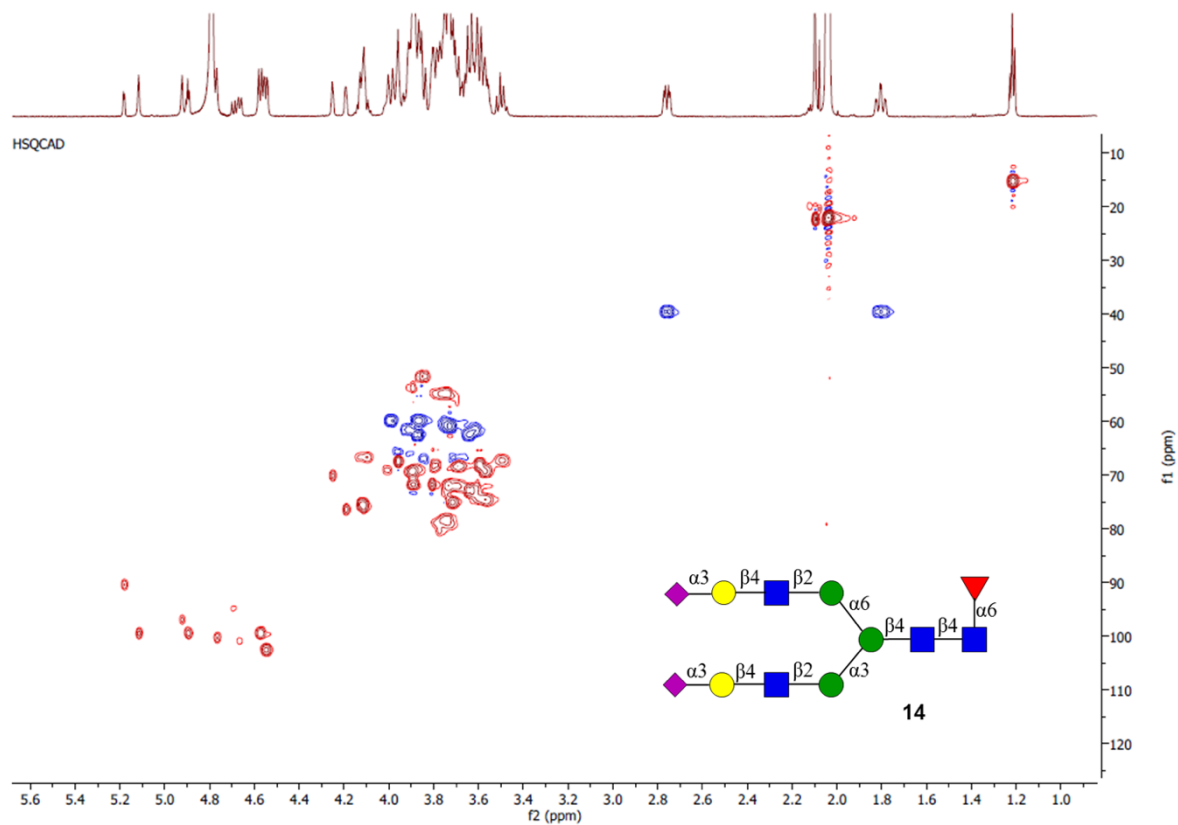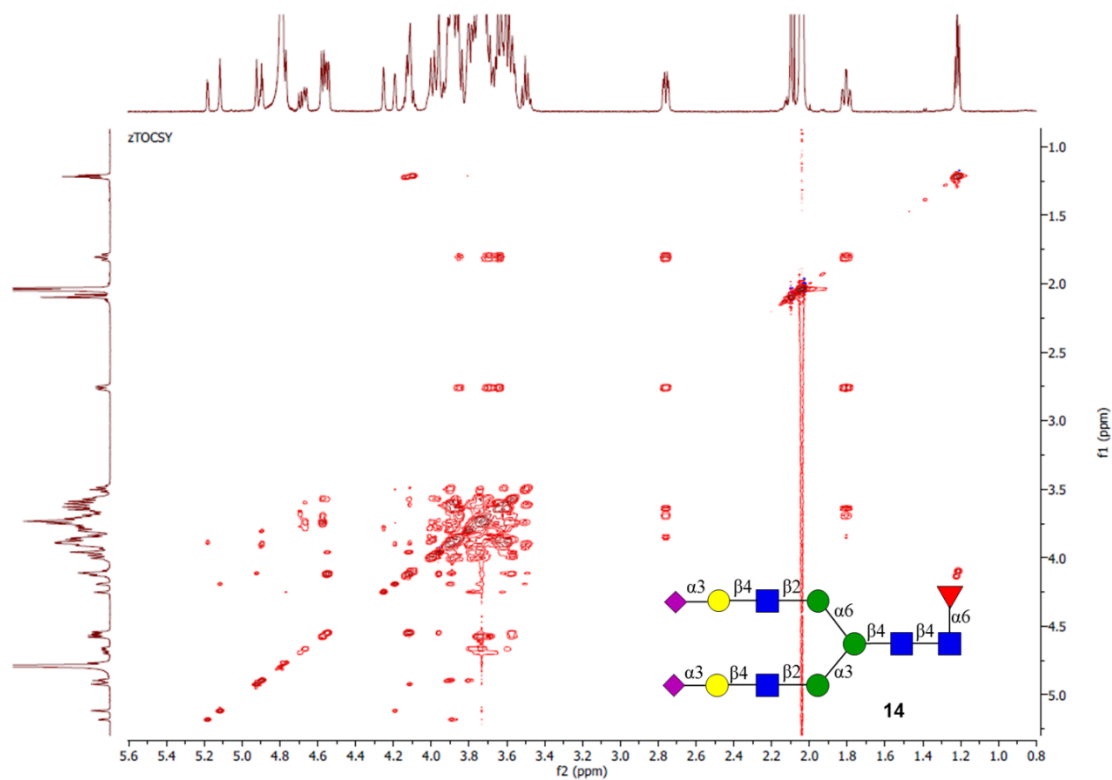

NMR spectra compound 14

# SUPPORTING INFORMATION

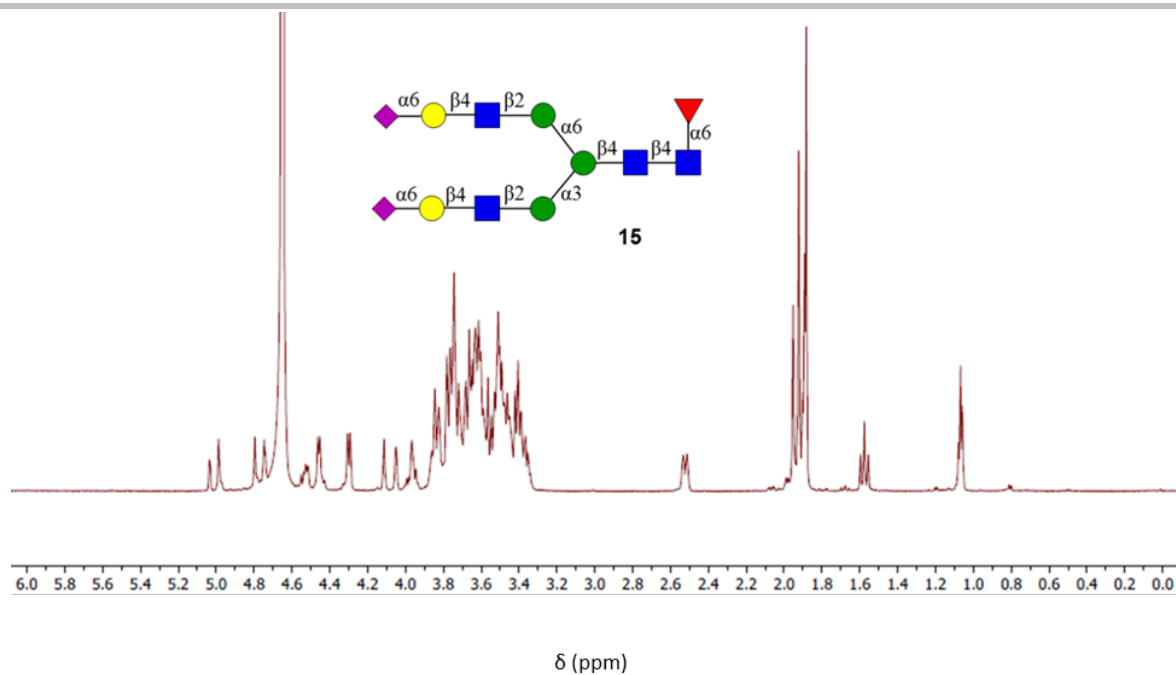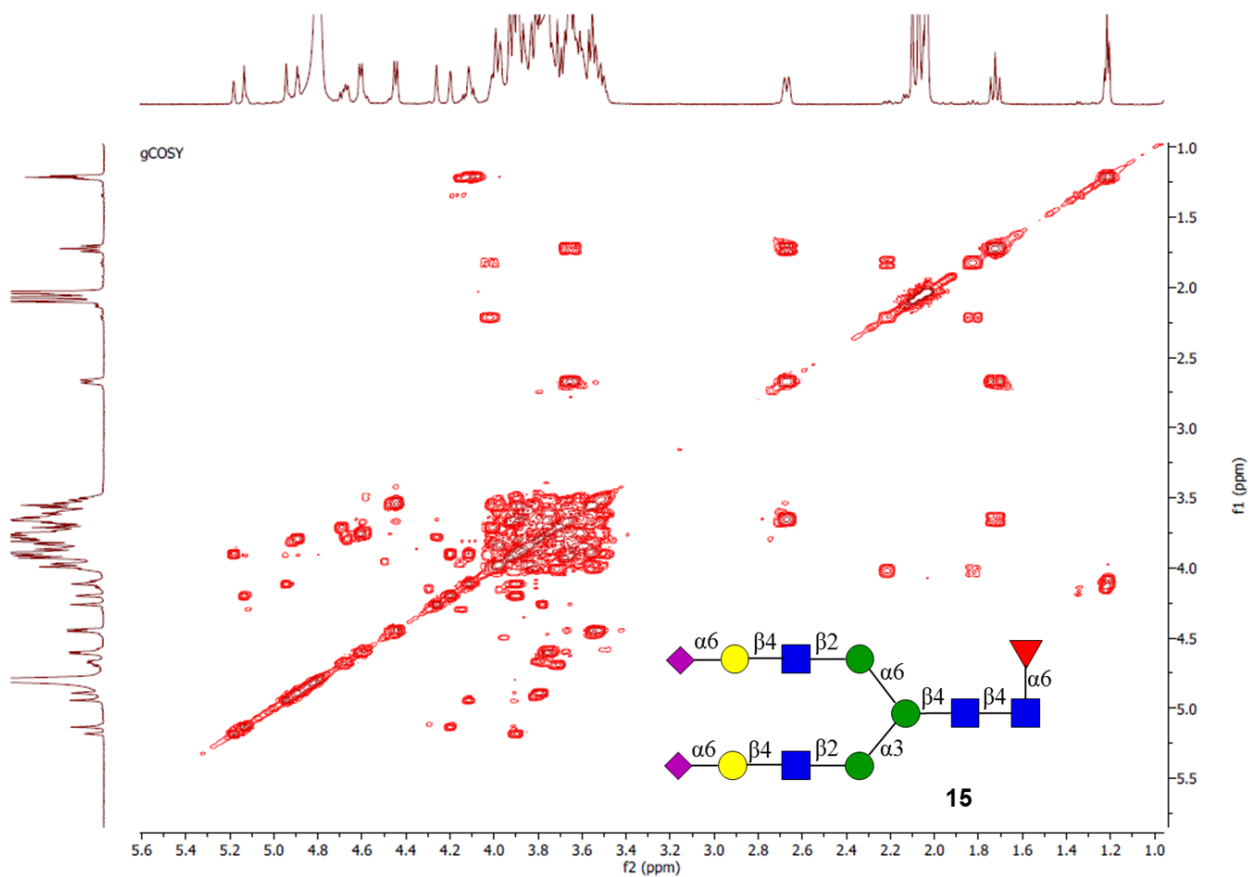

## SUPPORTING INFORMATION

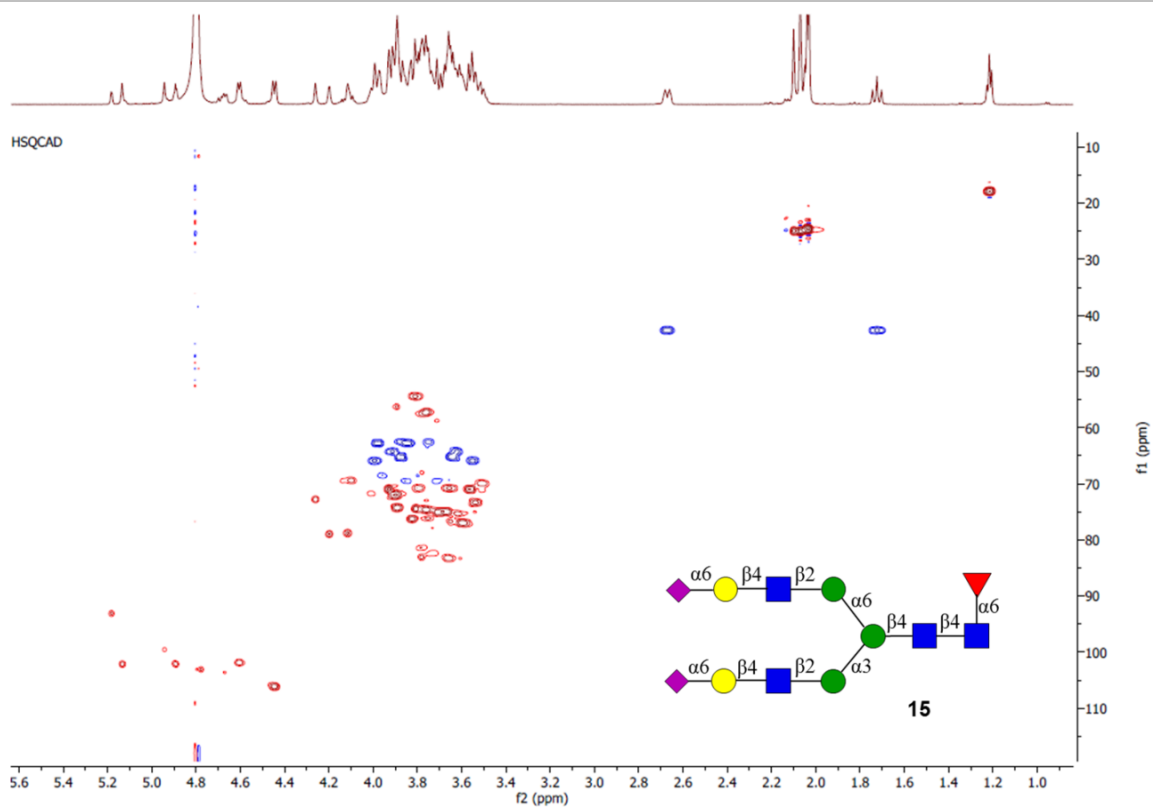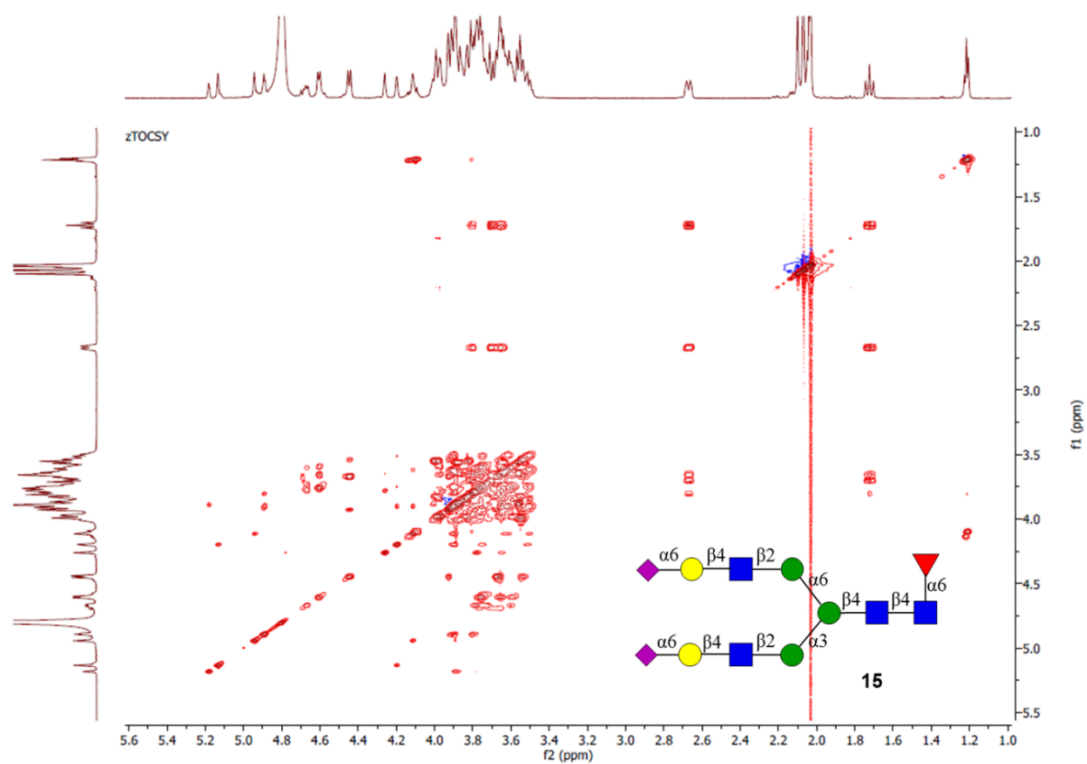

NMR spectra compound 15

### 1.4 N-glycan release, 2-AA labelling and purification

## SUPPORTING INFORMATION

Bovine fetuin (100 µg) was dissolved in 75 µL of water with 12.5 µL of denaturing buffer and heated at 100 °C for 10 minutes. After cooling to room temperature, 12.5 µL of glycobuffer, 12.5 µL of NP-40 solution and 2.5 U of PNGase F were added and the mixture was incubated at 37 °C overnight. After incubation, the sample was first cleaned using a C<sub>18</sub> solid phase extraction (SPE) cartridge, eluting the glycans with 1 mL of 5% ACN:95% water with 0.05% TFA (% v/v) and then evaporated under a stream of nitrogen. The residue was dissolved in water and N-glycans were extracted by PGC SPE by first washing retained analytes with 1 mL of 0.05% TFA in water, then with 1 mL ACN:water 5:95 (%v/v) containing 0.05% TFA (%v/v) and finally eluting with 1 mL of ACN/H<sub>2</sub>O 1:1 (v/v) containing 0.1% TFA. The sample was then evaporated under a stream of nitrogen and labelled by adding 10 µL of water and 10 µL of the labelling mixture containing 48 mg/mL 2-AA and 63 mg/mL of sodium cyanoborohydride in 10:3 (v/v) DMSO/acetic acid and incubation at 65 °C for 2 hours. This labelling procedure was also applied for pure standards. Labelled N-glycans were purified by Minitrap G-10 size exclusion SPE. Labelled sample was diluted to 100 µL with water and loaded onto an equilibrated column, washed with 700 µL of water and then eluted with 600 µL of water. Collected samples were evaporated under a stream of nitrogen and reconstituted in 30:70 water/ACN (%v/v) before analysis.

### 1.5 HILIC-IMS-QTOF analysis of glycans

N-glycan standards, both 2-AA labelled and unlabeled, were analyzed by direct infusion into an IMS-QTOF as well as by HILIC-QIMS-QTOF, and CCS values and ATDs were obtained. The instrument featured an Agilent 1260 Infinity LC system coupled to a 6560 IM-QTOF mass spectrometer through a jet stream electrospray ionization interface (Agilent Technologies, Santa Clara, CA). A ZIC-HILIC column (3µm, 100Å, 150 mm x 2.1 mm) with a guard column of 20 mm x 2.1 mm (Merck, Darmstadt, Germany), maintained at a temperature of 60 °C, was used for the LC separation. Gradient elution was applied using 50 mM ammonium formate, adjusted to pH 4.4 with formic acid, (eluent A) and 100% ACN (eluent B). The starting composition was 30 % A, increasing linearly to 50 % A in 20 minutes at a flow rate of 0.2 mL/min. Direct infusion experiments with standards were performed without a column with the starting eluent composition.

IMS separation was performed in the drift tube operated at an entrance voltage of -1700 V and exiting voltage of -250 V, using nitrogen as a drift gas. For stepped field CCS calculation, the drift tube entrance voltages were varied in the 1074-1674 V range with 100 V increment between steps. Trap funnel pressure was maintained at 5.07 mbar and the drift tube pressure at 5.27 mbar. The maximum drift time was set at 60 ms, with a trapping time of 20000 µs and a release time of 150 µs. Trapping funnel RF and rear funnel RF were set at 150 V. The MS settings were: a drying gas temperature of 300 °C at a flow rate of 8 L/min, a nebulizer pressure of 2.8 bar, a sheath gas flow of 11 L/min at a temperature of 350 °C and a capillary voltage of 3500 V.

### 1.6 Data treatment

## SUPPORTING INFORMATION

---

Mass calibration was performed with the IMS-MS reprocessor software of Agilent Technologies. Bovine fetuin data files were chromatographically smoothed (3 points) with the PNNL preprocessor. After smoothing, CCS single field and multi-field calibration were performed with Mass Hunter IM-MS software. In order to check for glycan structures, the feature finding option of the IM-MS browser was used, setting the glycans mode as isotope model, limiting charge states to 5 and ion intensities to  $\geq 50$ . In this way, CCS values of glycans were automatically calculated by the software. Glycan masses that were found were assigned to possible compositions with the online GlycoMod software.

# SUPPORTING INFORMATION

## 2. Results and Discussion

### 2.1 Arrival time distributions of standards as $[M-H]^-$ and $[M-2H]^{2-}$ ions

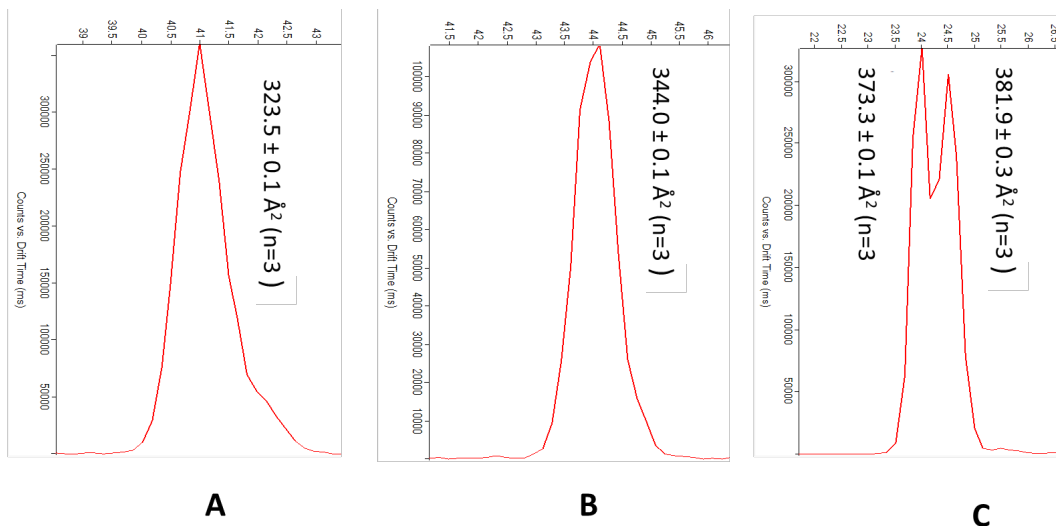

**Fig. S1:** ATDs and CCSs of standard 1 as unlabeled  $[M-H]^-$  ions (A), 2-AA labeled  $[M-1H]^-$  ions (B) and 2-AA labeled  $[M-2H]^{2-}$  ions (C).

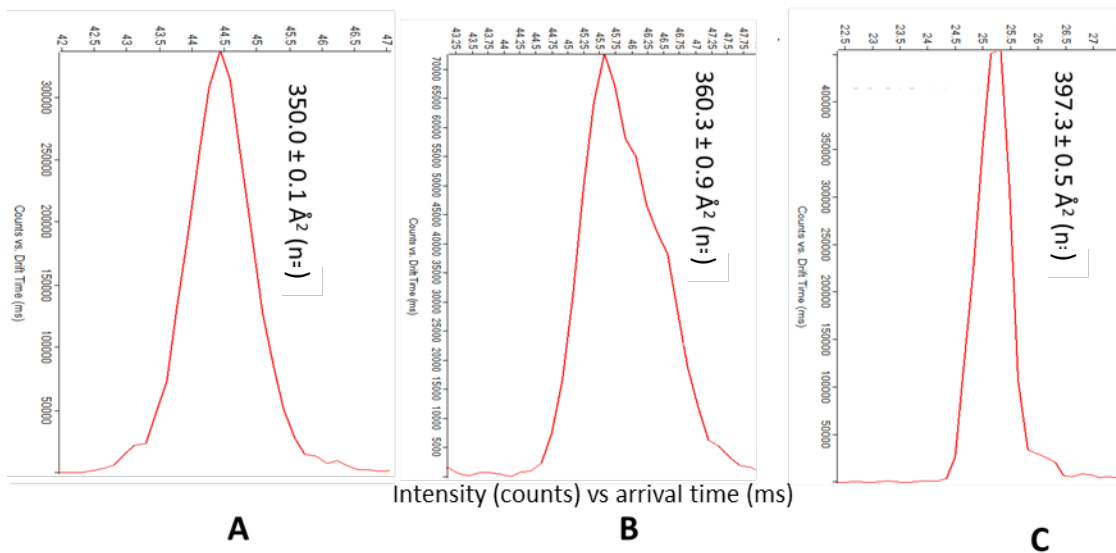

**Fig. S2:** ATDs and CCSs of standard 2 as unlabeled  $[M-H]^-$  ions (A), 2-AA labeled  $[M-1H]^-$  ions (B) and 2-AA labeled  $[M-2H]^{2-}$  ions (C).

## SUPPORTING INFORMATION

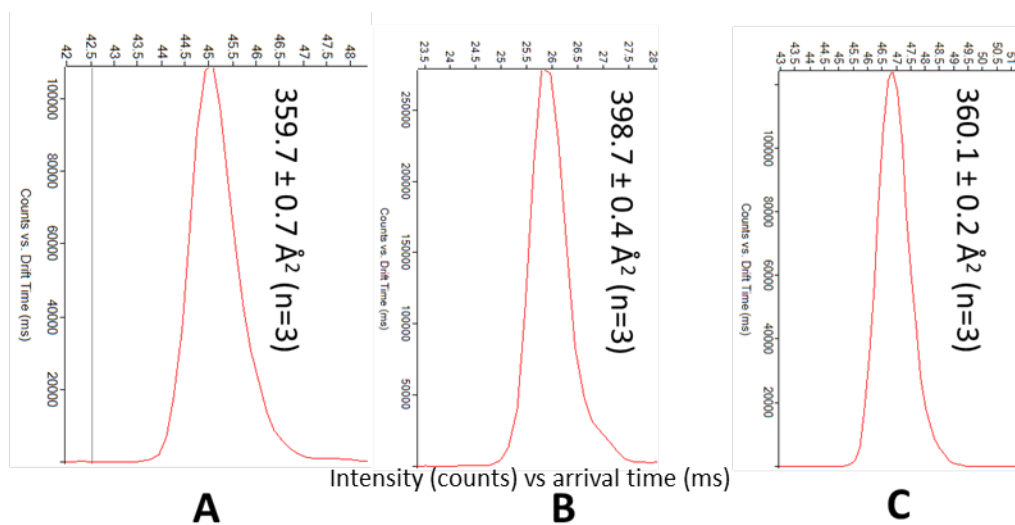

**Fig. S3:** ATDs and CCSs of standard **3** as unlabeled [M-H]<sup>-</sup> ions (A), 2-AA labeled [M-1H]<sup>-</sup> ions (B) and 2-AA labeled [M-2H]<sup>2-</sup> ions (C).

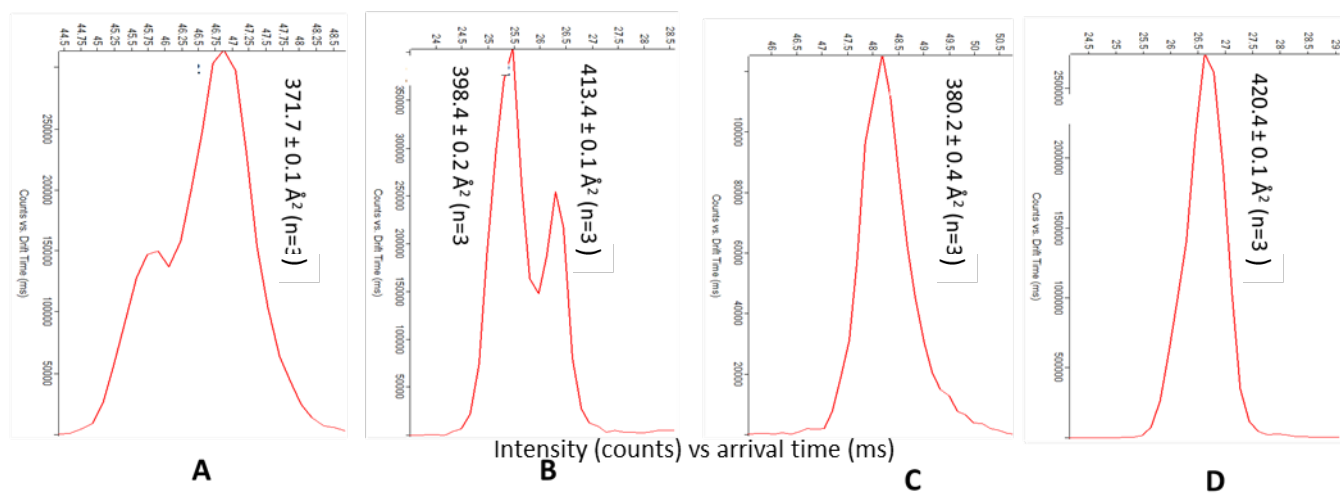

**Fig. S4:** ATDs and CCSs of standard **4** as unlabeled [M-H]<sup>-</sup> ions (A), unlabeled [M-2H]<sup>2-</sup> ions (B), 2-AA labeled [M-1H]<sup>-</sup> ions (C) and 2-AA labeled [M-2H]<sup>2-</sup> ions (D).



## SUPPORTING INFORMATION

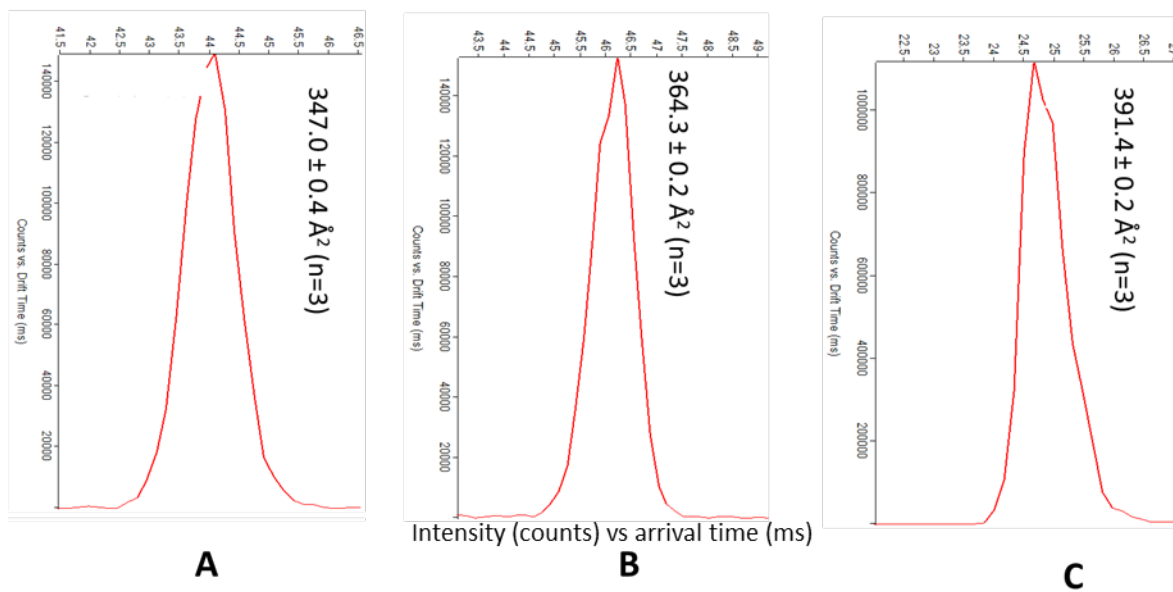

**Fig. S5:** ATDs and CCSs of standard 5 as unlabeled  $[M-H]^+$  ions (A), 2-AA labeled  $[M-H]^+$  ions (B) and 2-AA labeled  $[M-2H]^{2-}$  ions (C).

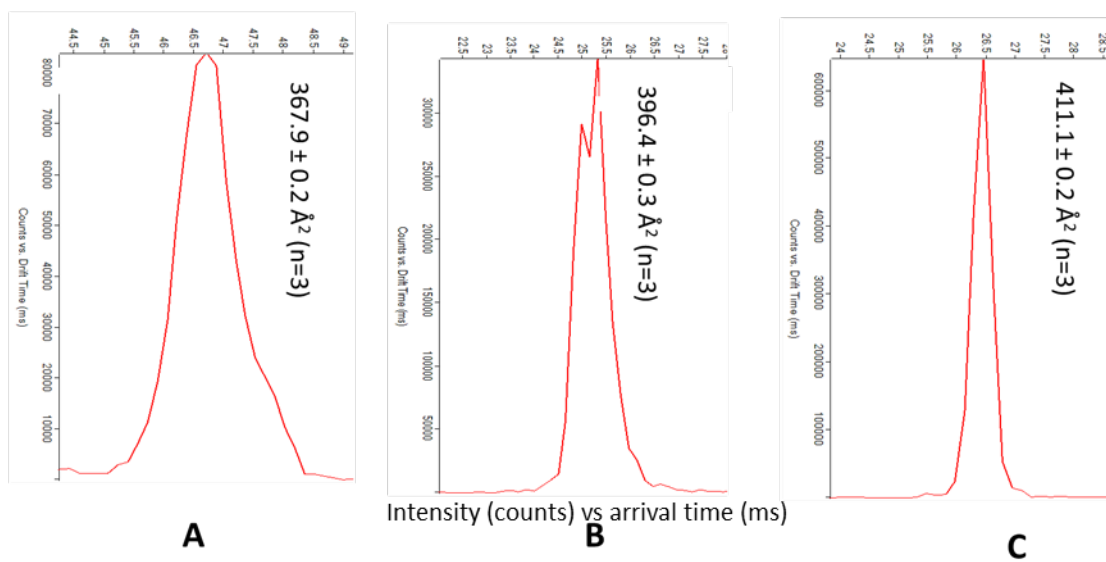

**Fig. S6:** ATDs and CCSs of standard 6 as unlabeled  $[M-H]^+$  ions (A), 2-AA labeled  $[M-1H]^+$  ions (B) and 2-AA labeled  $[M-2H]^{2-}$  ions (C).

# SUPPORTING INFORMATION

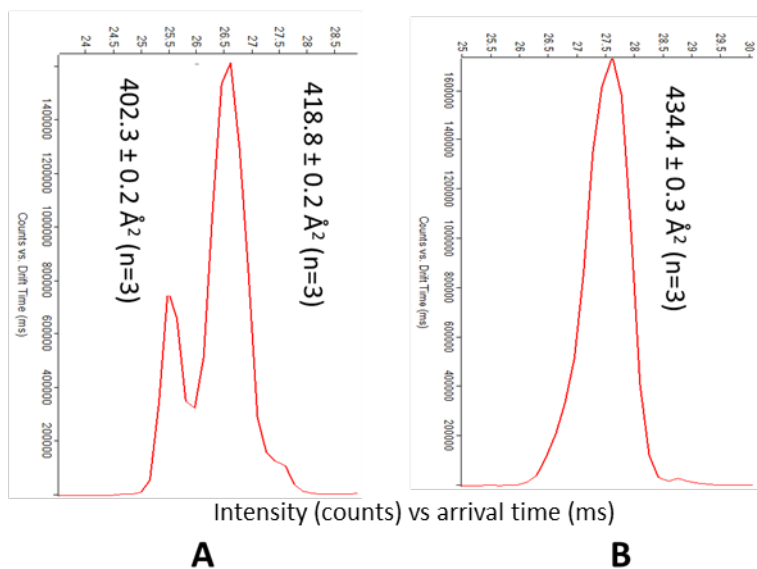

**Fig. S7:** ATDs and CCSs of standard **7** as unlabeled  $[M-2H]^{2-}$  ions (A) and 2-AA labeled  $[M-2H]^{2-}$  ions (B).

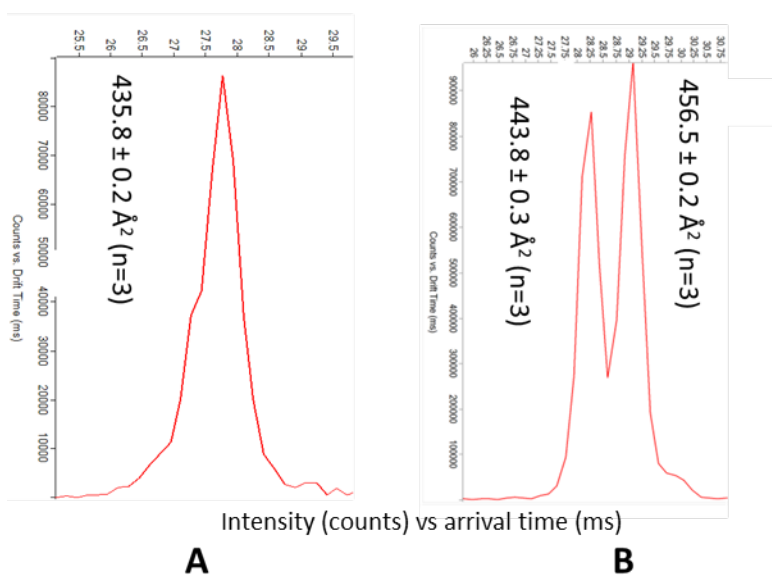

**Fig. S8:** ATDs and CCSs of standard **8** as unlabeled  $[M-2H]^{2-}$  ions (A) and 2-AA labeled  $[M-2H]^{2-}$  ions (B).

## SUPPORTING INFORMATION

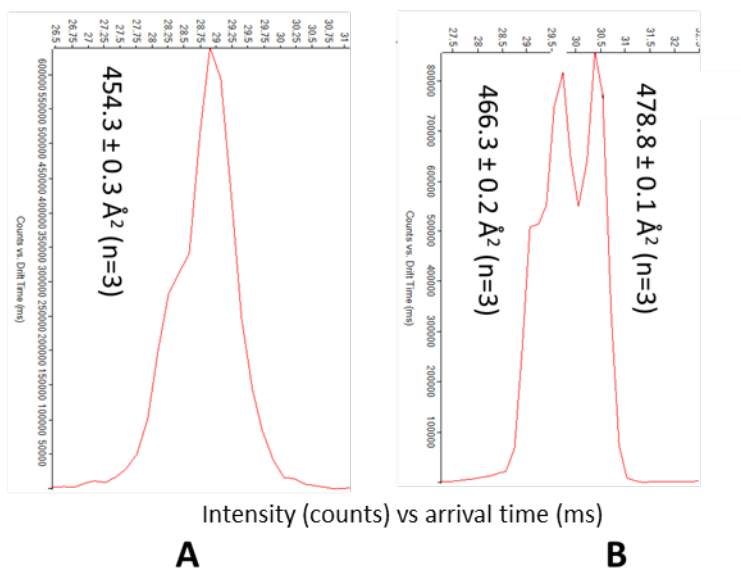

**Fig. S9:** ATDs and CCSs of standard **9** as unlabeled  $[M-2H]^{2-}$  ions (A) and 2-AA labeled  $[M-2H]^{2-}$  ions (B).

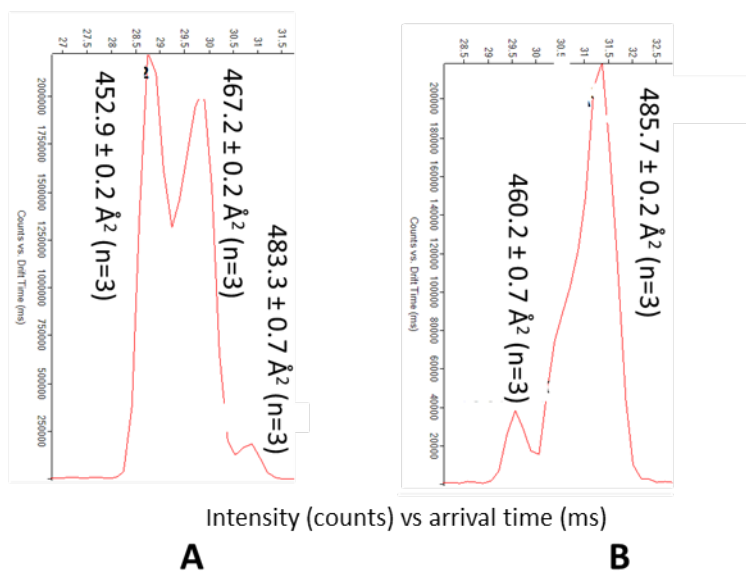

**Fig. S10:** ATDs and CCSs of standard **10** as unlabeled  $[M-2H]^{2-}$  ions (A) and 2-AA labeled  $[M-2H]^{2-}$  ions (B).

## SUPPORTING INFORMATION

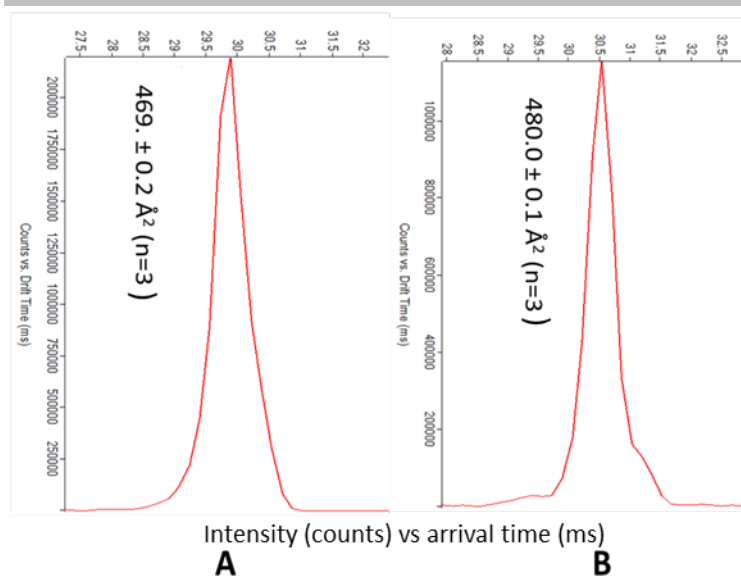

**Fig. S11:** ATDs and CCSs of standard 11 as unlabeled  $[M-2H]^{2-}$  ions (A) and 2-AA labeled  $[M-2H]^{2-}$  ions (B).

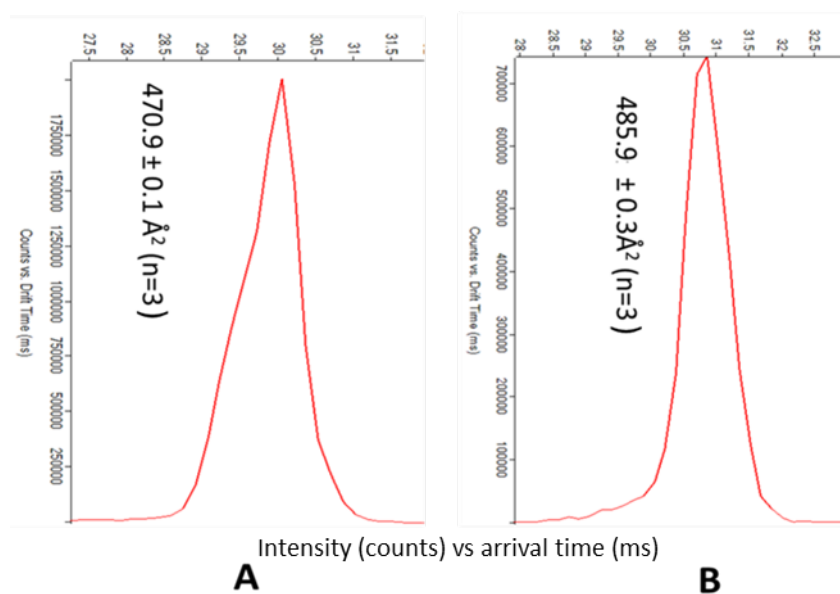

**Fig. S12:** ATDs and CCSs of standard 12 as unlabeled  $[M-2H]^{2-}$  ions (A) and 2-AA labeled  $[M-2H]^{2-}$  ions (B).

# SUPPORTING INFORMATION

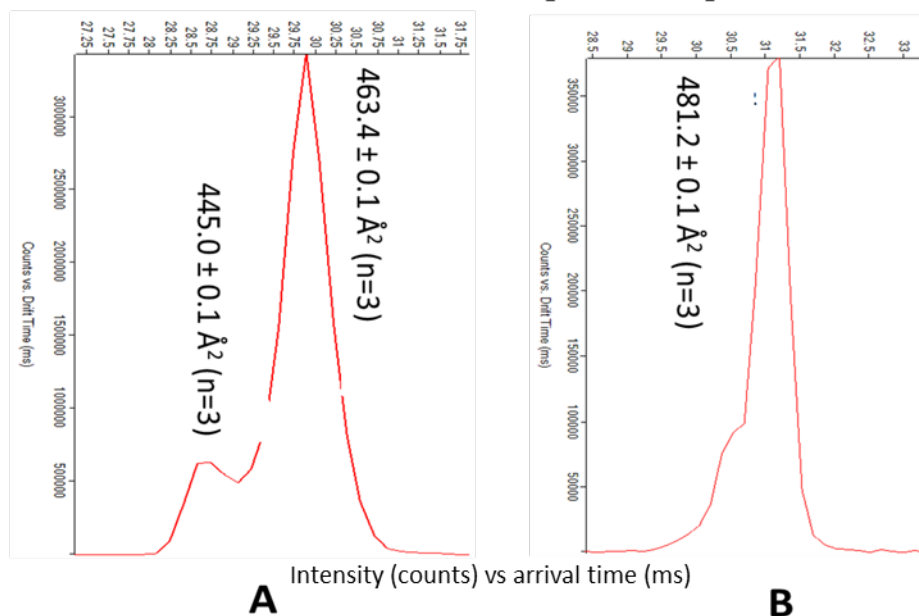

**Fig. S13:** ATDs and CCSs of standard **13** as unlabeled  $[M-2H]^{2-}$  ions (A) and 2-AA labeled  $[M-2H]^{2-}$  ions (B).

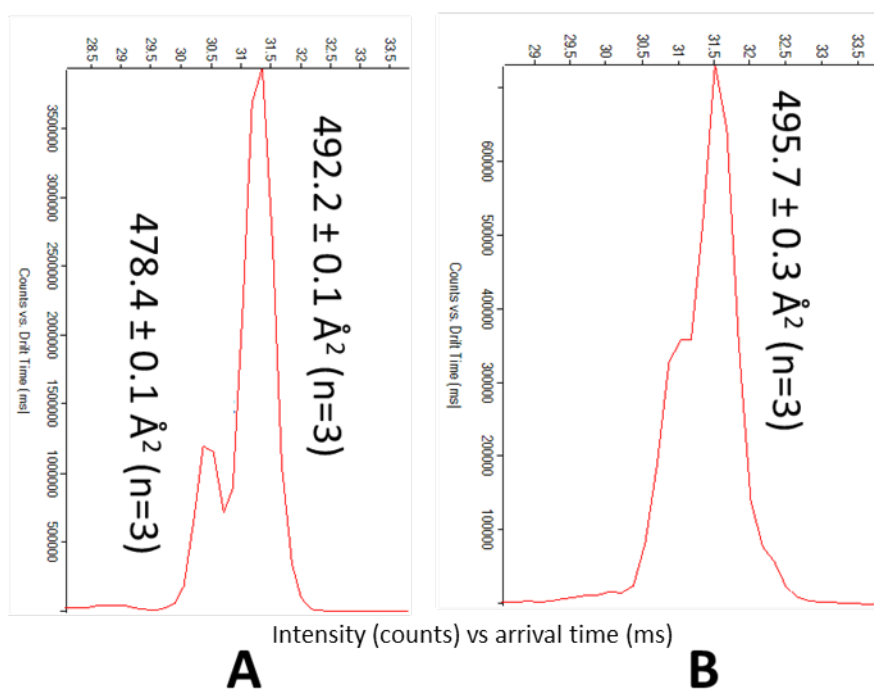

**Fig. S14:** ATDs and CCSs of standard **14** as unlabeled  $[M-2H]^{2-}$  ions (A) and 2-AA labeled  $[M-2H]^{2-}$  ions (B).

## SUPPORTING INFORMATION

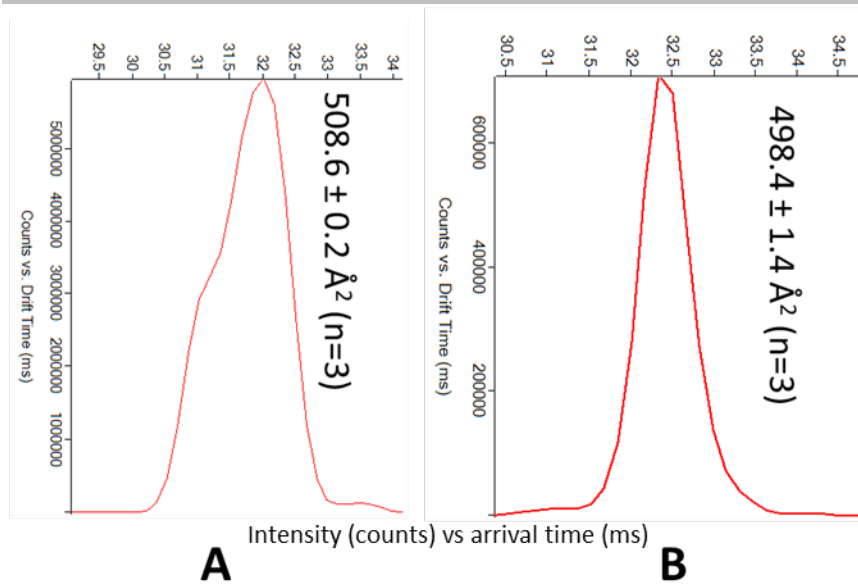

**Fig. S15:** ATDs and CCSs of standard **15** as unlabeled  $[M-2H]^{2-}$  ions (A) and 2-AA labeled  $[M-2H]^{2-}$  ions (B).

## SUPPORTING INFORMATION

### 2.2 ATDs of standards obtained with different trapping RF values

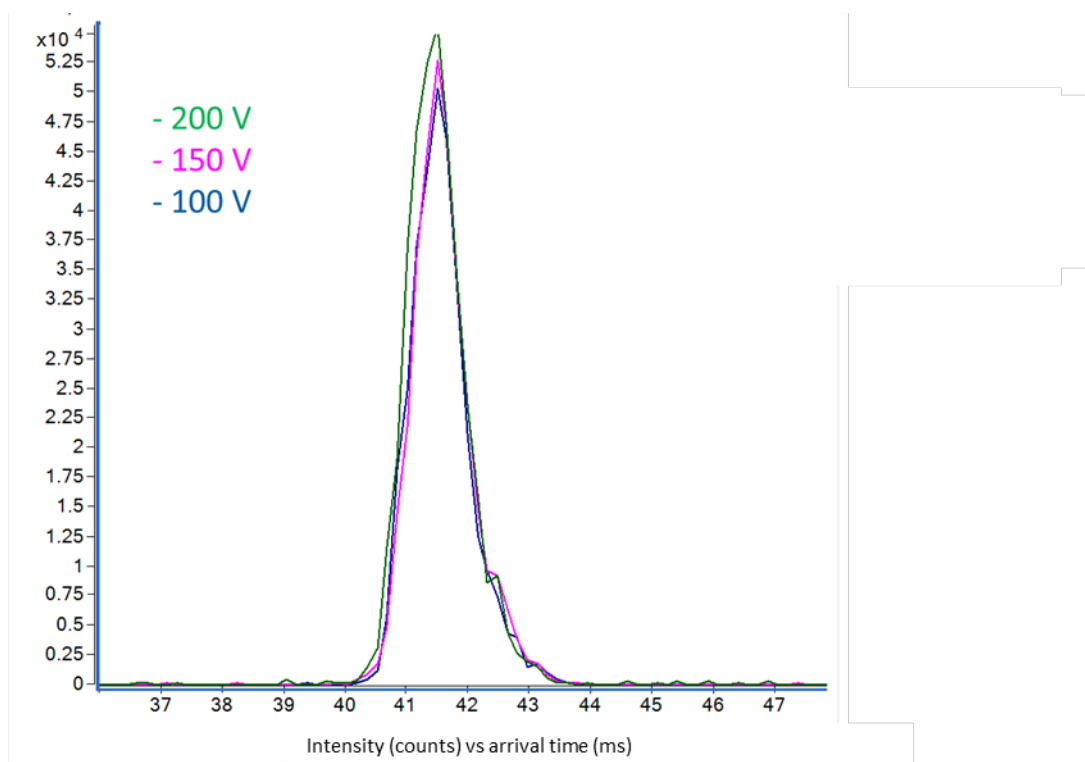

**Fig. S16:** overlaid ATDs of unlabeled standard 1 as  $[M-H]^+$  ions, obtained at different RF voltages (100V pictured in blue, 150V in pink, and 200V in green)

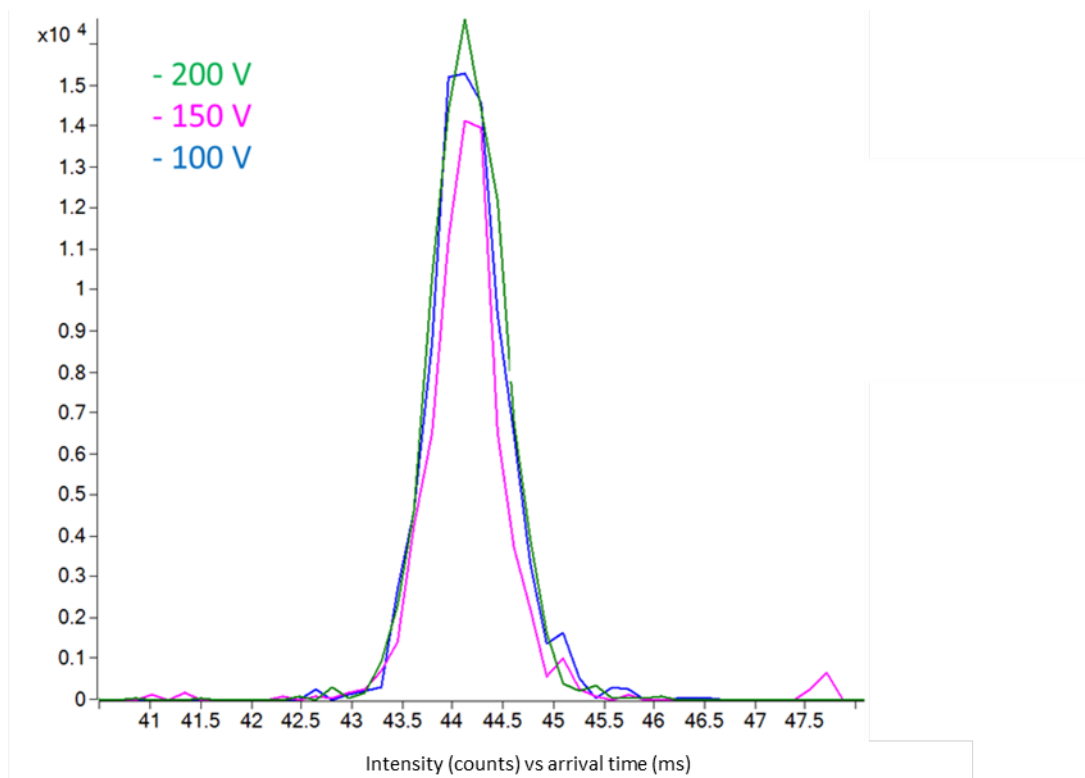

**Fig. S17:** overlaid IMS ATDs of 2-AA labelled standard 1 as  $[M-H]^+$  ions, obtained at different RF voltages (100V pictured in blue, 150V in pink, and 200V in green)

## SUPPORTING INFORMATION

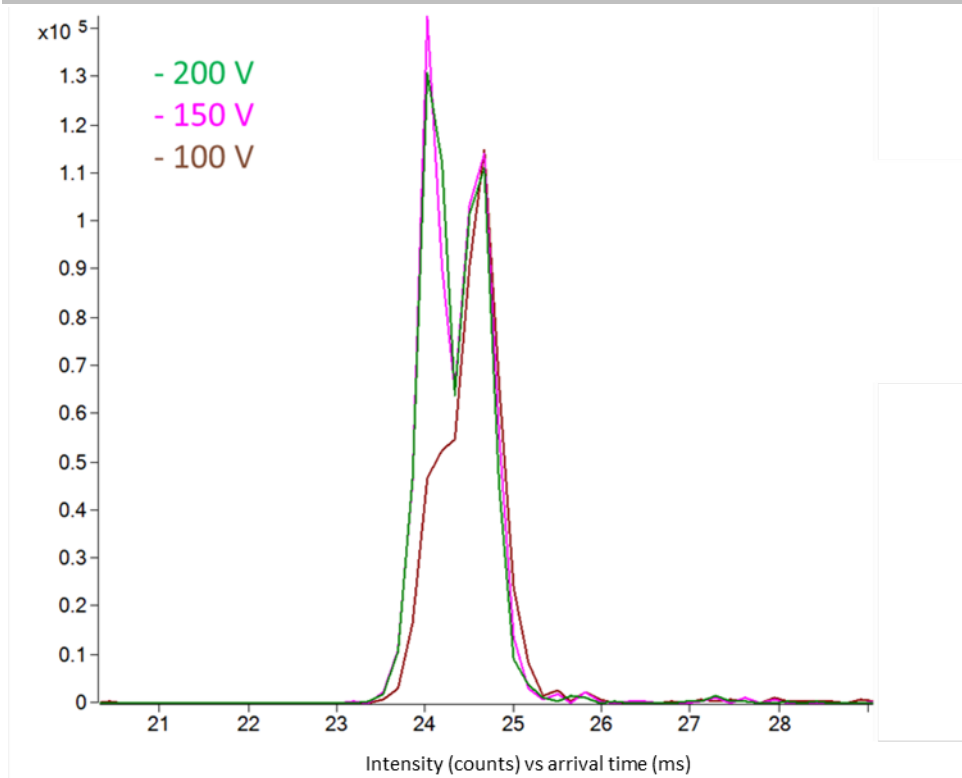

**Fig. S18:** overlaid IMS ATDs of 2-AA labelled standard 1 as  $[M-2H]^{2+}$  ions, obtained at different RF voltages (100V pictured in brown, 150V in pink, and 200V in green)

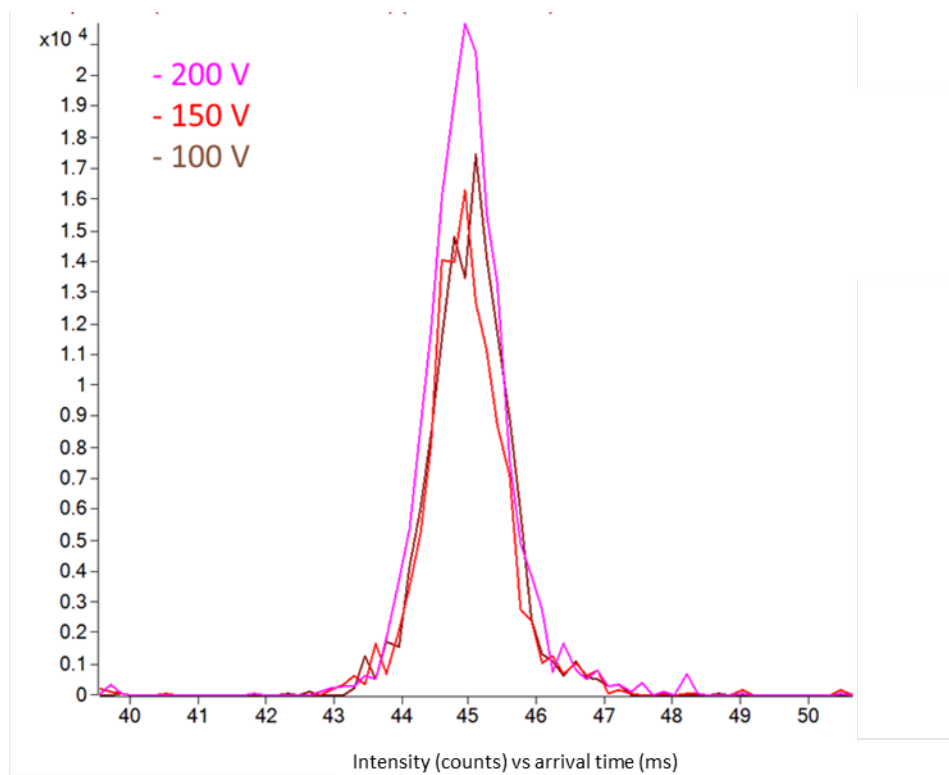

**Fig. S19:** overlaid IMS ATDs of unlabeled standard 2 as  $[M-H]^+$  ions, obtained at different RF voltages (100V pictured in brown, 150V in red, and 200V in pink)



## SUPPORTING INFORMATION

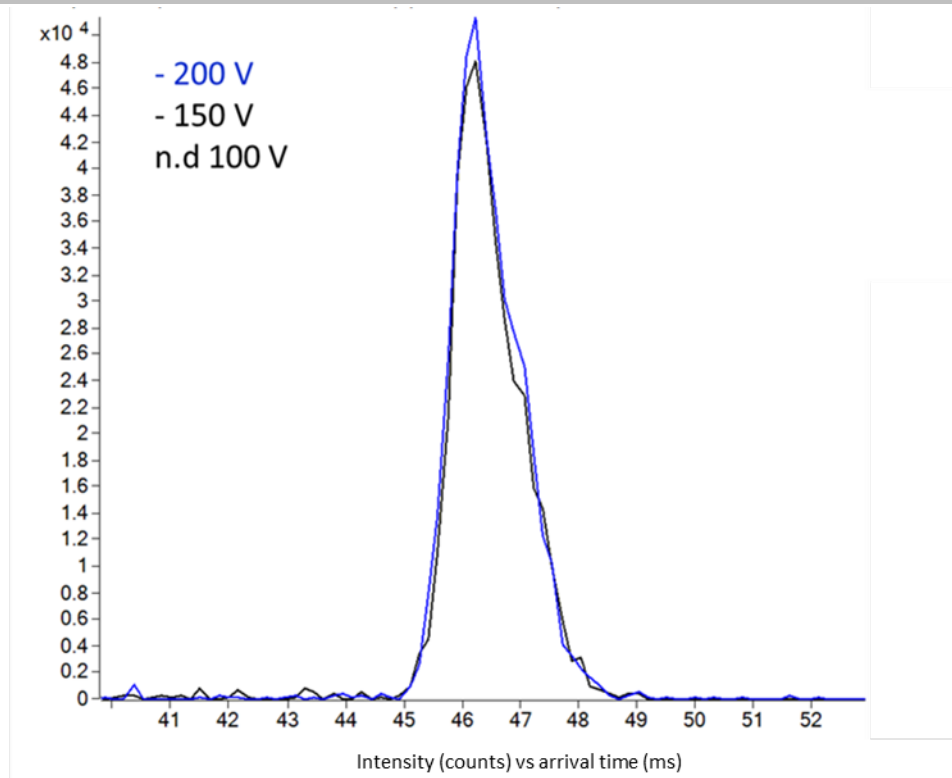

**Fig. S20:** overlaid IMS ATDs of 2-AA labeled standard **2** as  $[M-H]^+$  ions, obtained at different RF voltages (100V was not detected, 150V in black, and 200V in blue)

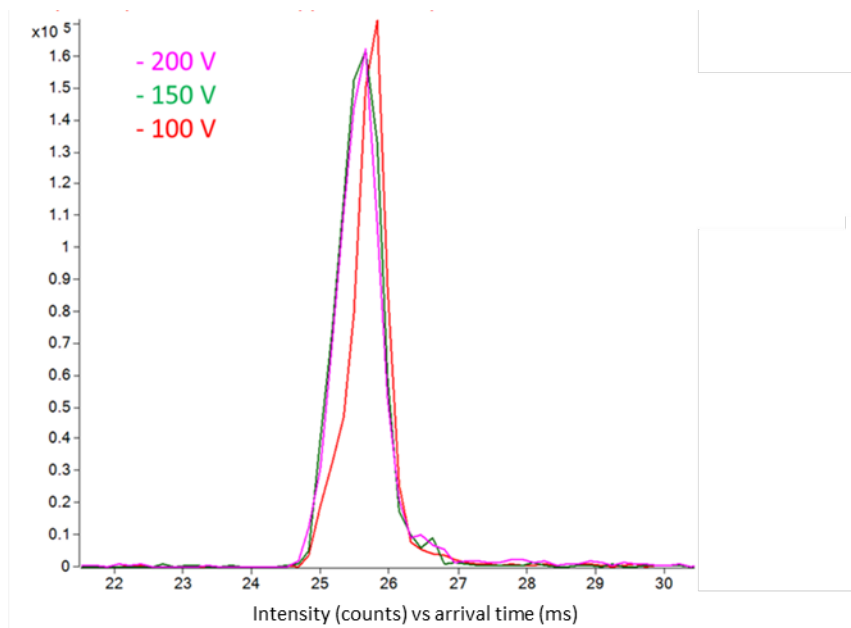

**Fig. S21:** overlaid IMS ATDs of 2-AA labelled standard **2** as  $[M-2H]^{2+}$  ions, obtained at different RF voltages (100V was not detected, 150V in black, and 200V in blue)

## SUPPORTING INFORMATION

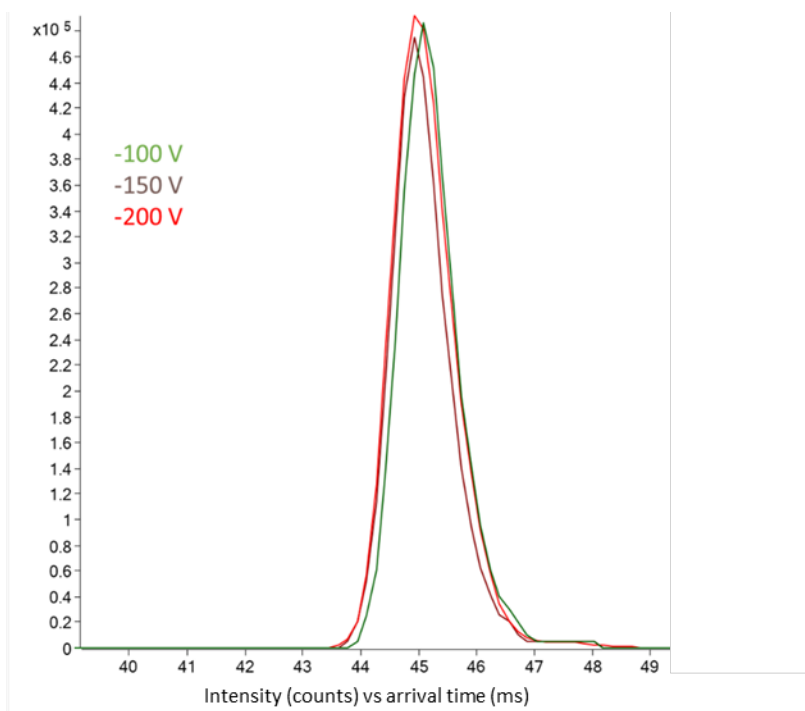

**Fig. S22:** overlaid IMS ATDs of unlabeled standard **3** as  $[M-H]^+$  ions, obtained at different RF voltages (100V in green, 150V in brown, and 200V in red)

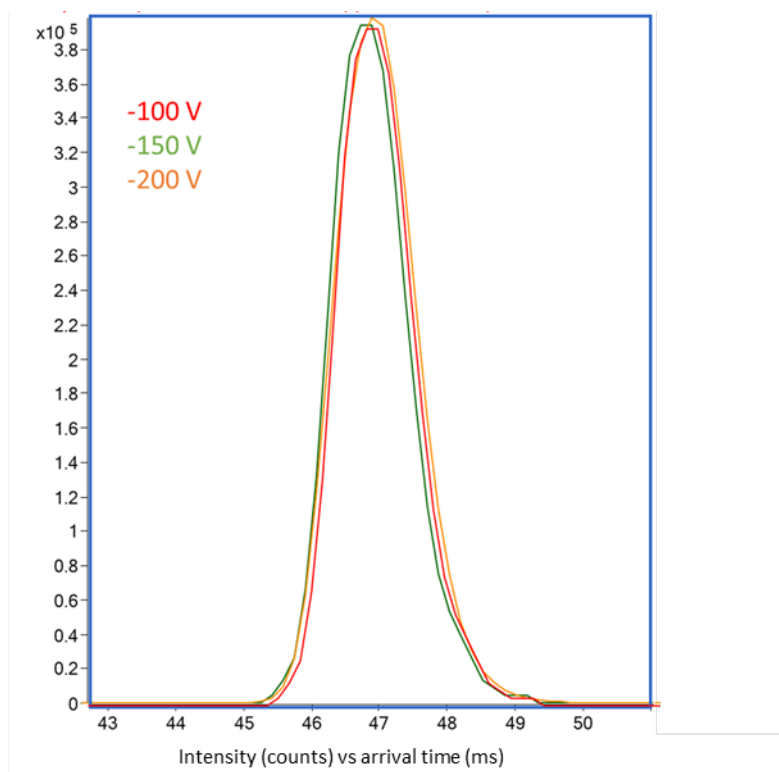

**Fig. S23:** overlaid IMS ATDs of 2-AA labelled standard **3** as  $[M-H]^+$  ions obtained, at different RF voltages (100V in red, 150V in green, and 200V in orange)

## SUPPORTING INFORMATION

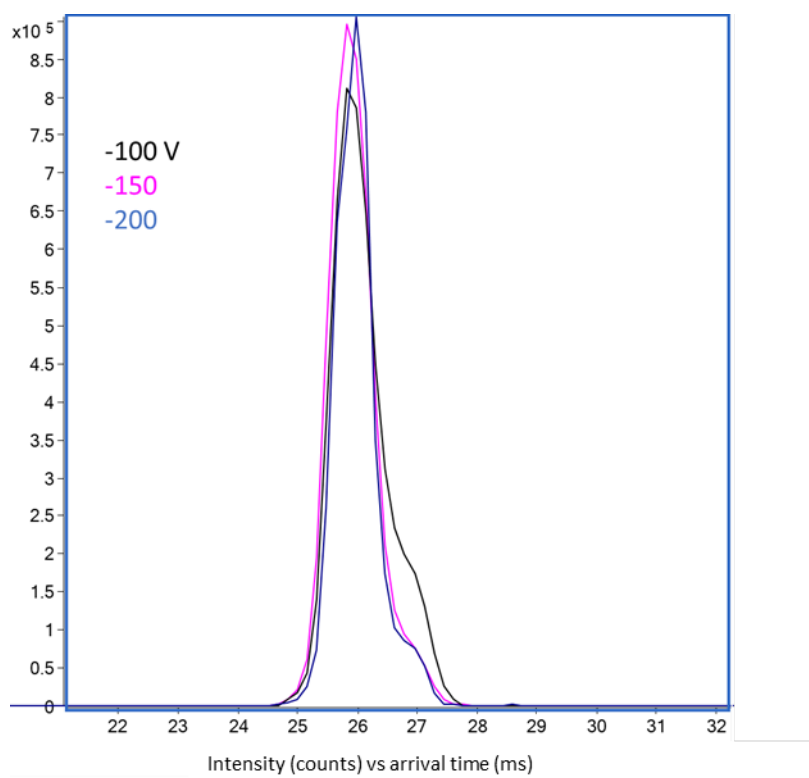

**Fig. S24:** overlaid IMS ATDs of 2-AA labelled standard **3** as  $[M-2H]^{2+}$  ions, obtained at different RF voltages (100V in red, 150V in green, and 200V in orange)

## SUPPORTING INFORMATION

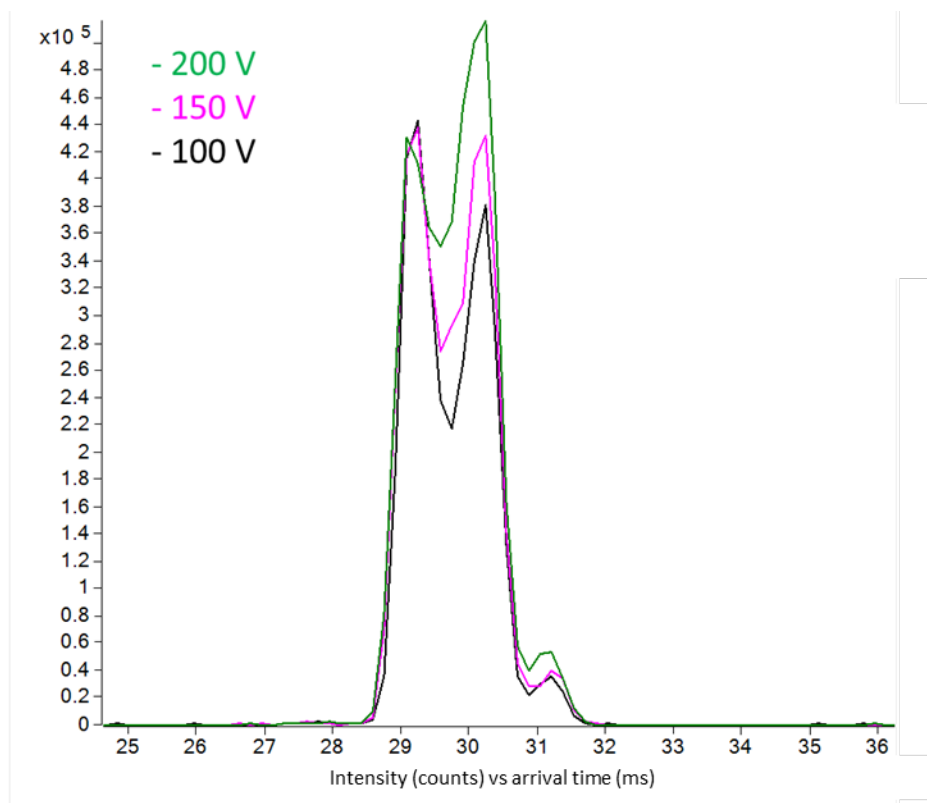

**Fig. S25:** overlaid IMS ATDs of unlabeled standard **4** as  $[M-2H]^{2-}$  ions, obtained at different RF voltages (100V pictured in black, 150V in pink, and 200V in green)

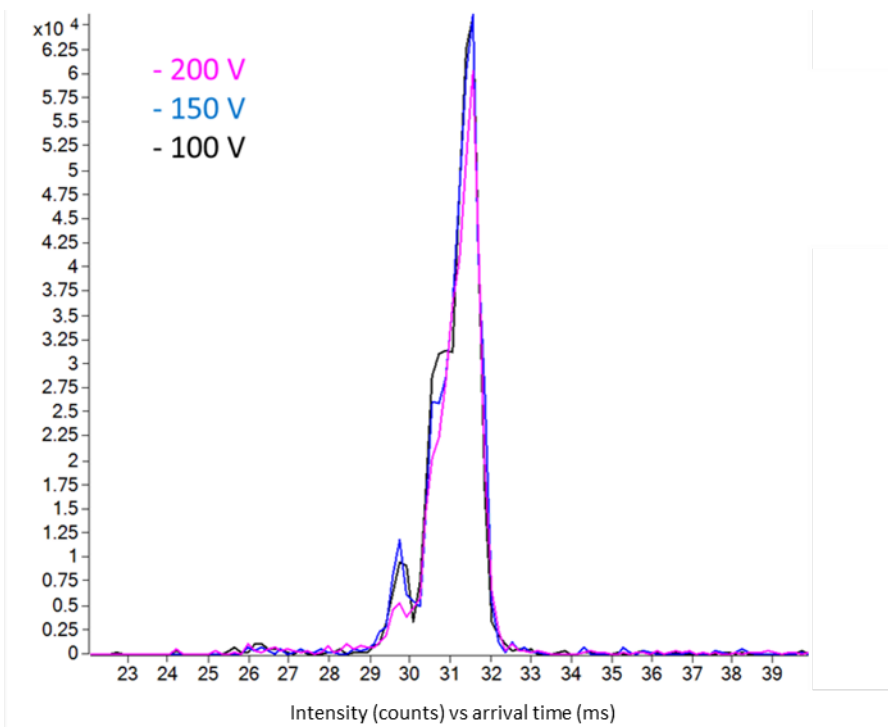

**Fig. S26:** overlaid IMS ATDs of 2-AA labelled standard **4** as  $[M-2H]^{2-}$  ions, obtained at different RF voltages (100V in black, 150V in blue, and 200V in pink)

## SUPPORTING INFORMATION

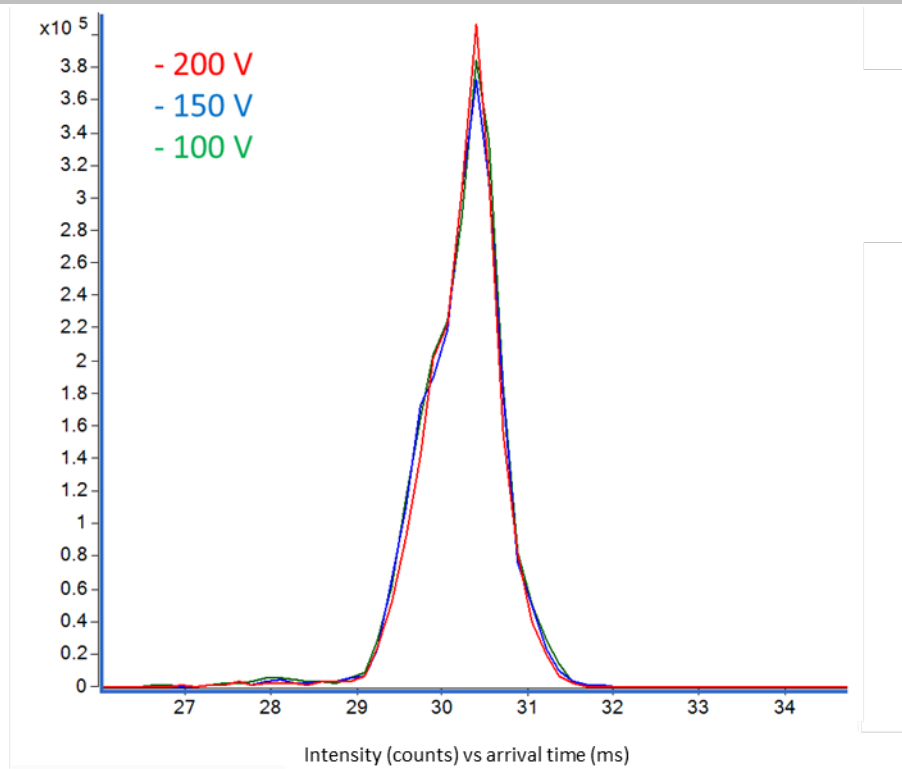

**Fig. S27:** overlaid IMS ATDs of unlabeled standard 5 as  $[M-2H]^{2-}$  ions, obtained at different RF voltages (100V pictured in black, 150V in blue, and 200V in pink)

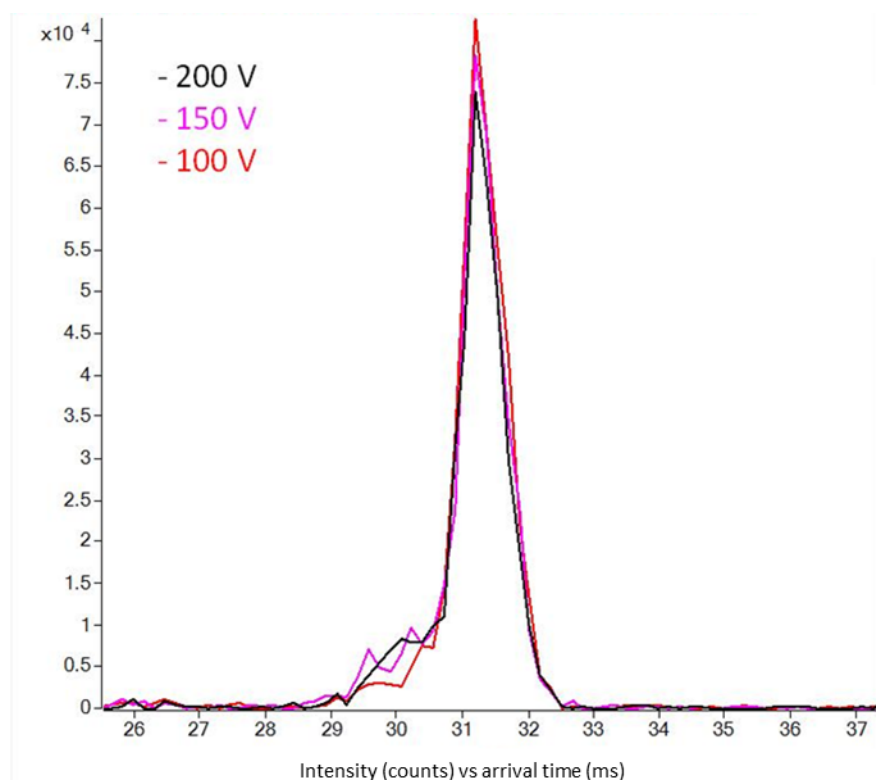

**Fig. S28:** overlaid IMS ATDs of 2-AA labelled standard 5 as  $[M-2H]^{2-}$  ions, obtained at different RF voltages (100V pictured in red, 150V in pink, and 200V in black)

## SUPPORTING INFORMATION

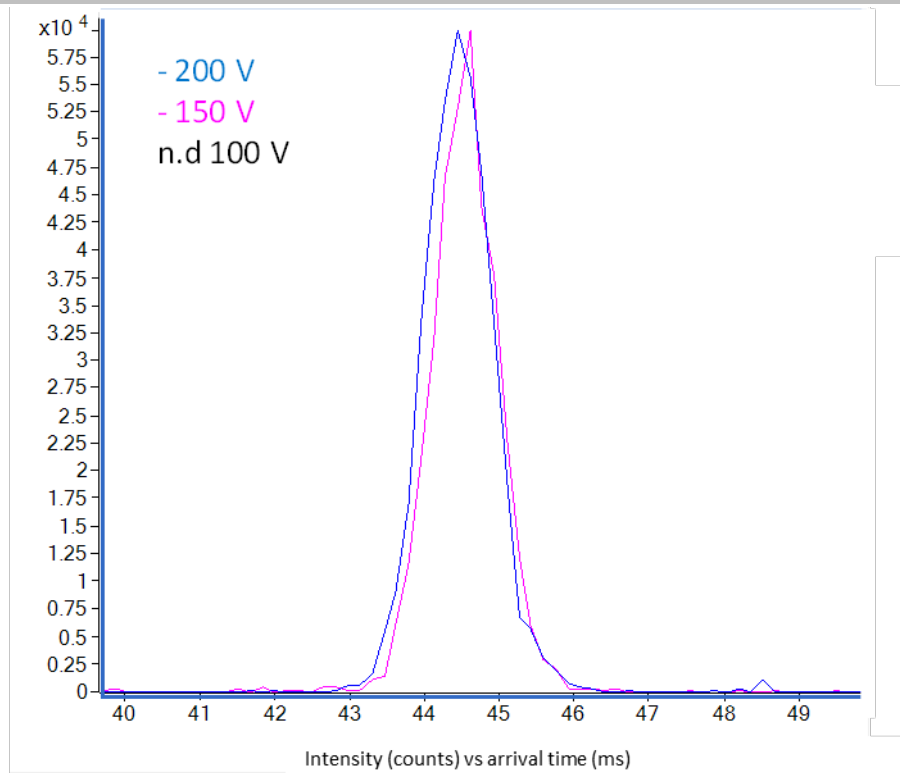

**Fig. S29:** Overlaid IMS ATDs of unlabeled standard **6** as  $[M-H]^-$  ions, obtained at different RF voltages (100V was not detected, 150V in pink, and 200V in blue)

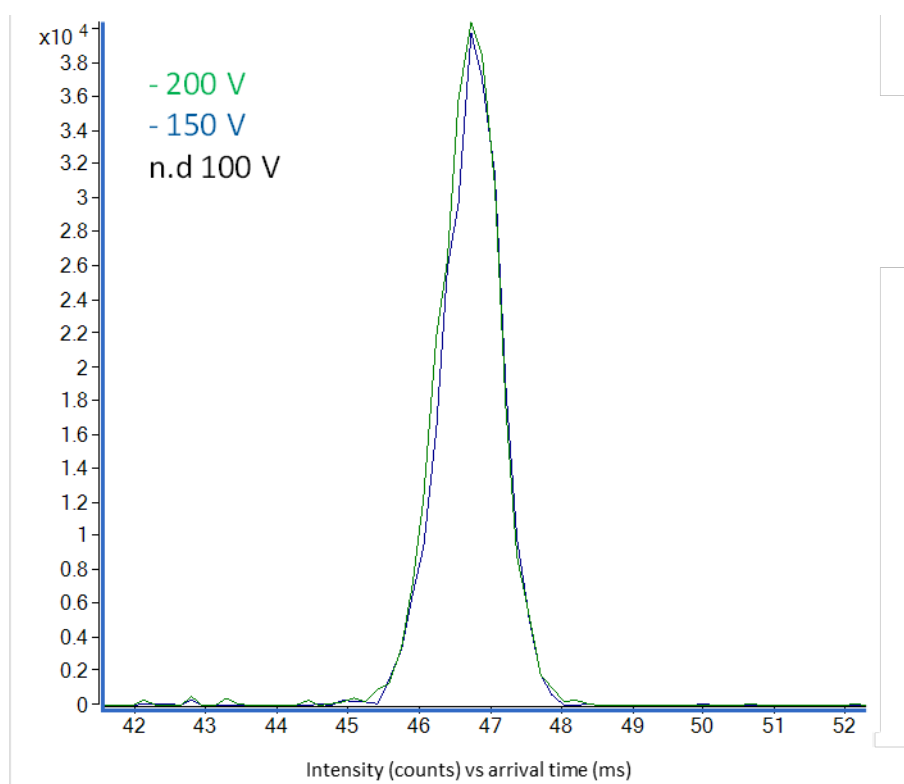

**Fig. S30:** Overlaid IMS ATDs of 2-AA labelled standard **6** as  $[M-H]^-$  ions, obtained at different RF voltages (100V was not detected, 150V in blue, and 200V in green)

## SUPPORTING INFORMATION

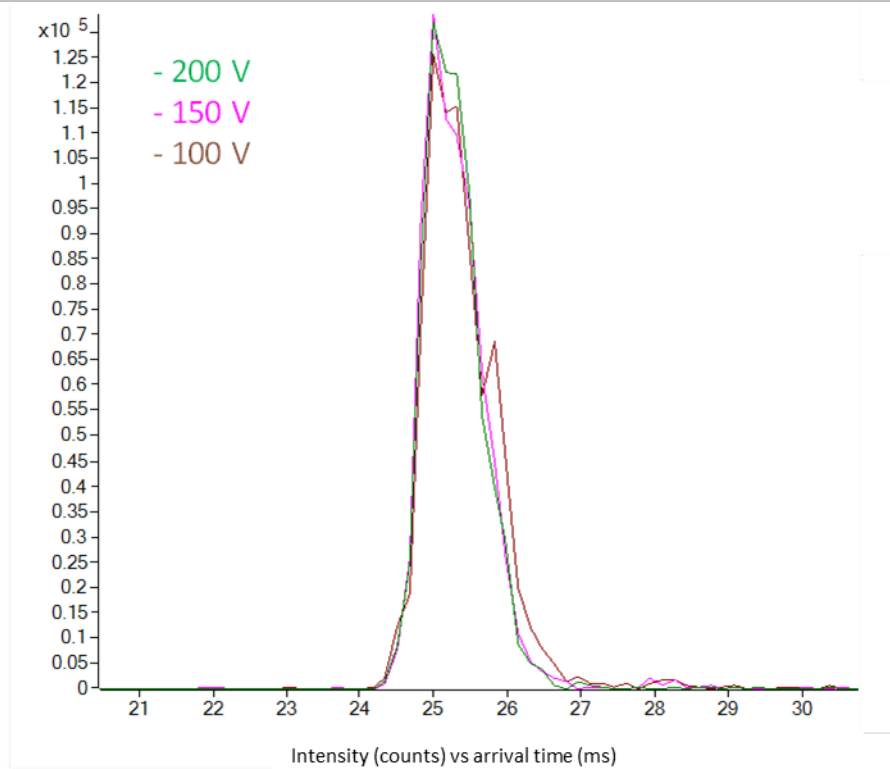

**Fig. S31:** Overlaid IMS ATDs of 2-AA labelled standard 6 as  $[M-2H]^{2+}$  ions, obtained at different RF voltages (100V in brown, 150V in pink and 200V in green)

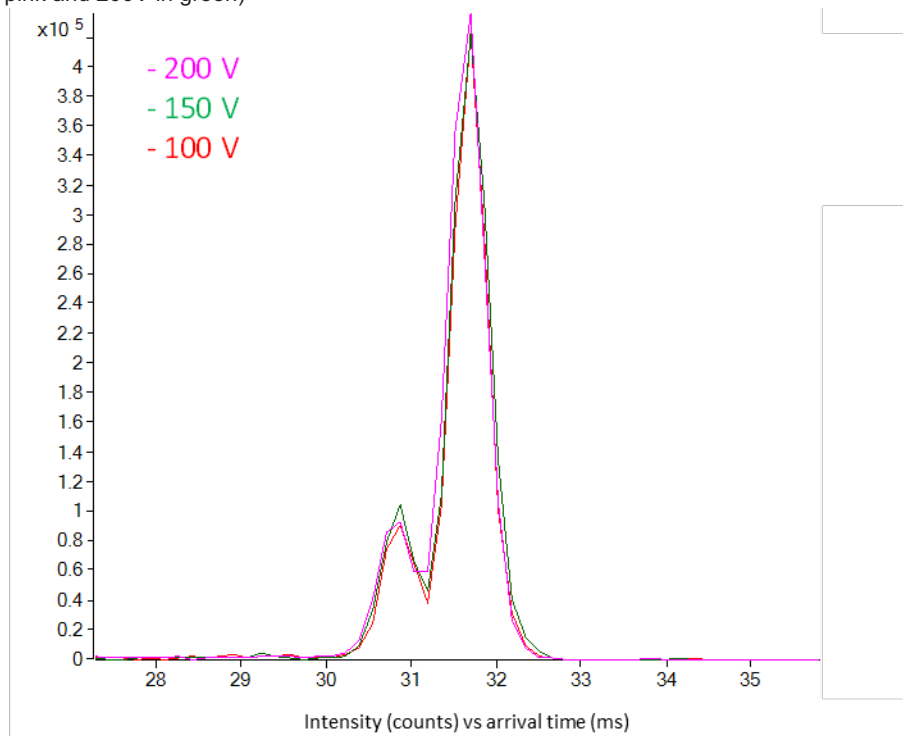

**Fig. S32:** Overlaid IMS ATDs of unlabeled standard 7 as  $[M-2H]^{2+}$  ions, obtained at different RF voltages (100V in red, 150V in green and 200V in pink)

## SUPPORTING INFORMATION

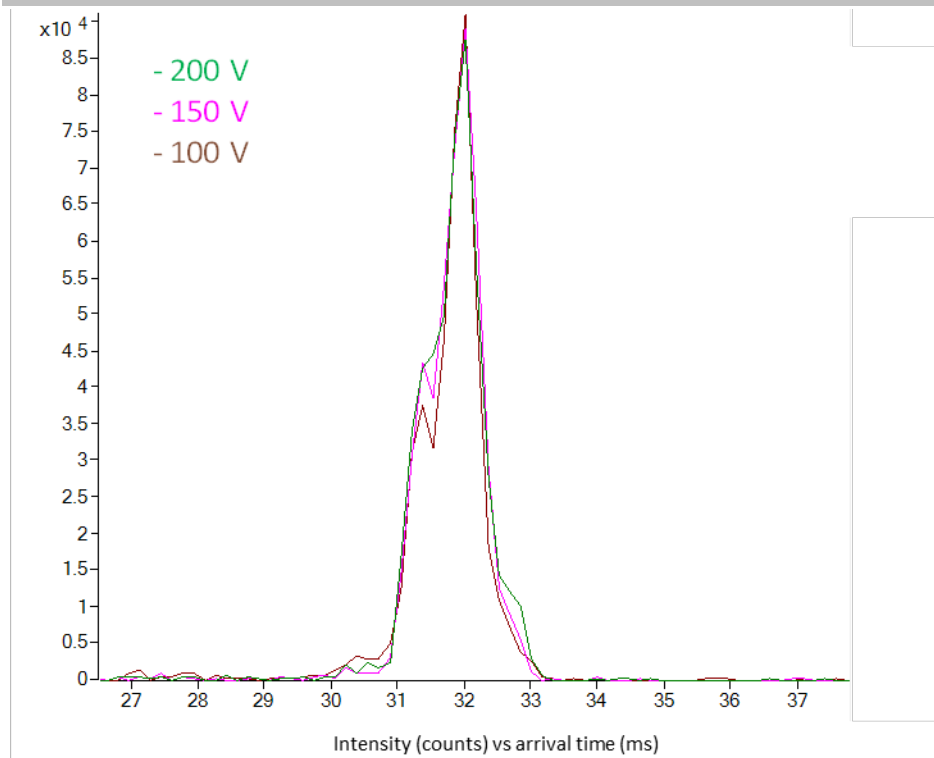

**Fig. S33:** Overlaid IMS ATDs of 2-AA labelled standard 7 as  $[M-2H]^{2+}$  ions, obtained at different RF voltages (100V in brown, 150V in pink and 200V in green)

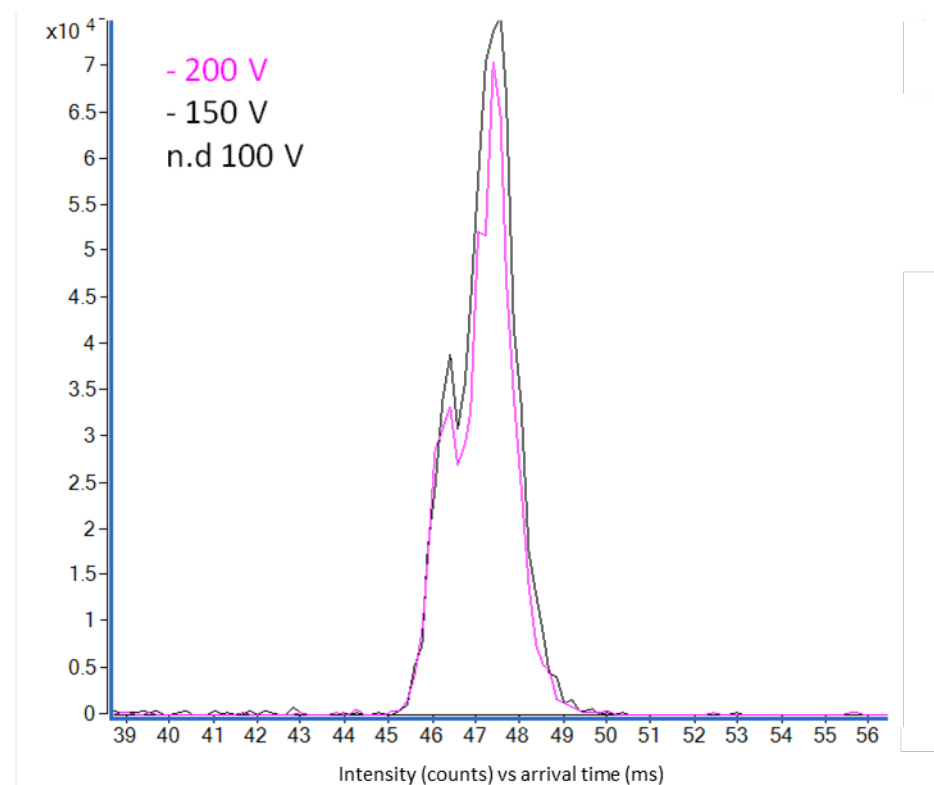

**Fig. S34:** Overlaid IMS ATDs of unlabeled standard 8 as  $[M-H]^+$  ions, obtained at different RF voltages (100V was not detected, 150V in black, and 200V in pink)



## SUPPORTING INFORMATION

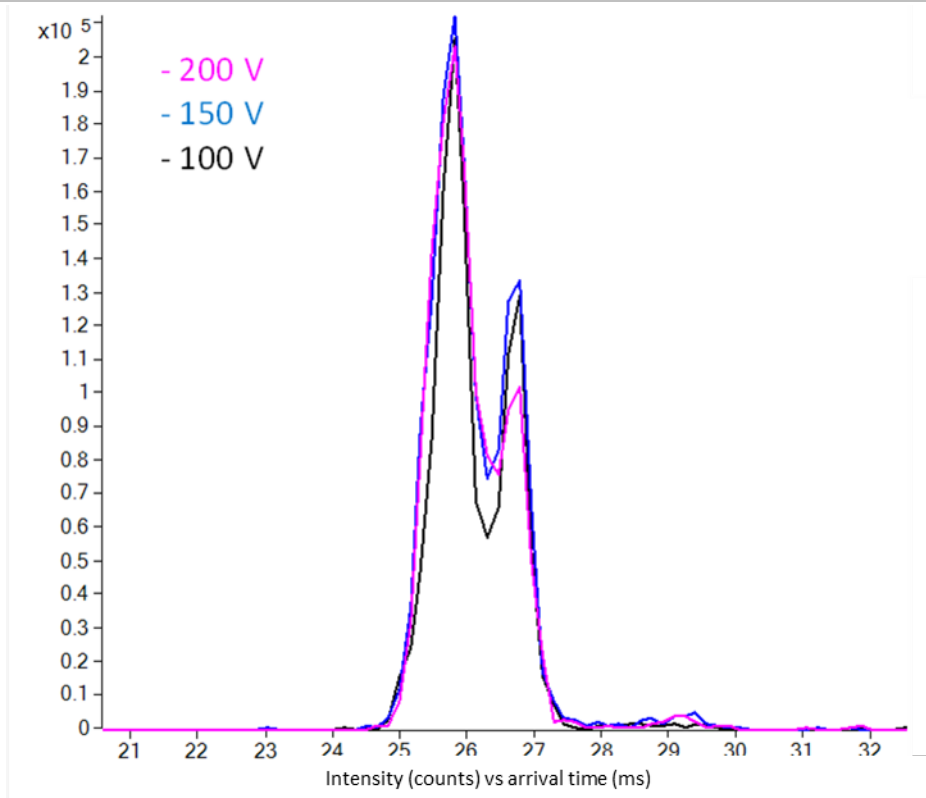

**Fig. S35:** Overlaid IMS ATDs of unlabeled standard 8 as  $[M-2H]^{2+}$  ions, obtained at different RF voltages (100V is pictured in black, 150V in blue, and 200V in pink)

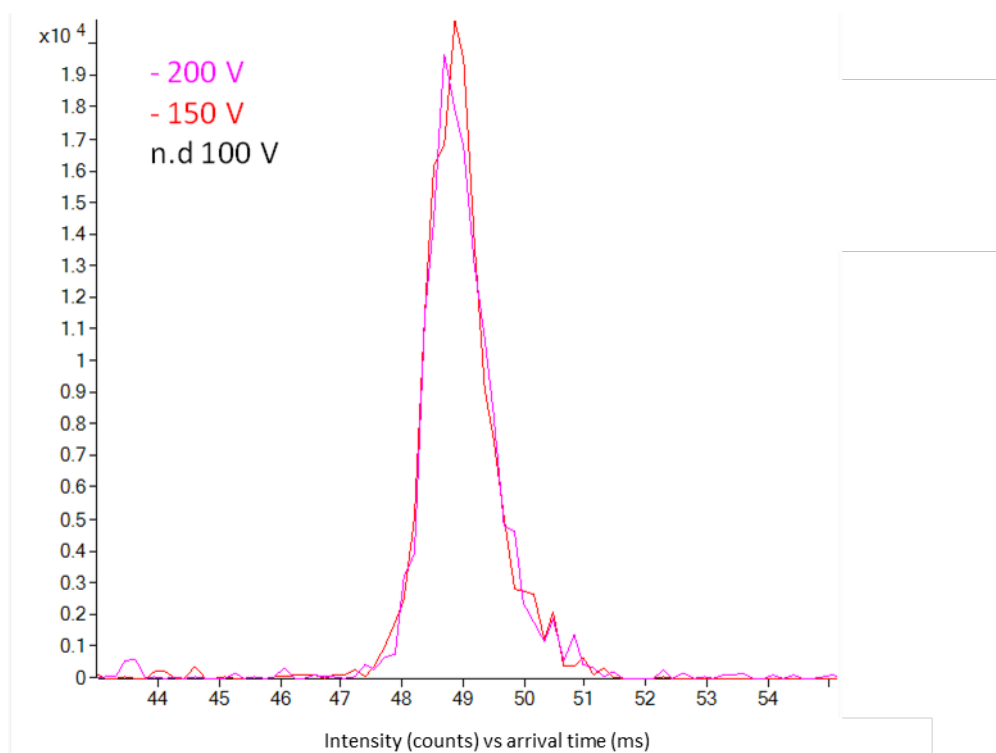

**Fig. S36:** Overlaid IMS ATDs of 2-AA labelled standard 8 as  $[M-H]^+$  ions, obtained at different RF voltages (100V was not detected, 150V in red and 200V in pink)

## SUPPORTING INFORMATION

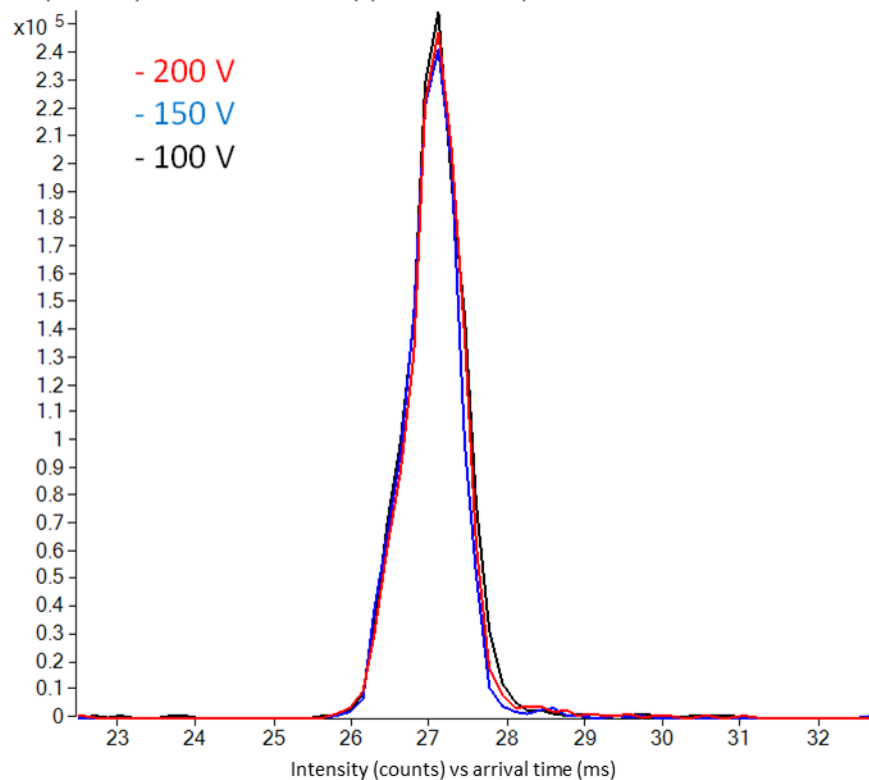

**Fig. S37:** Overlaid IMS ATDs of 2-AA labelled standard **8** as  $[M-2H]^{2-}$  ions, obtained at different RF voltages (100V in black, 150V in blue and 200V in red)

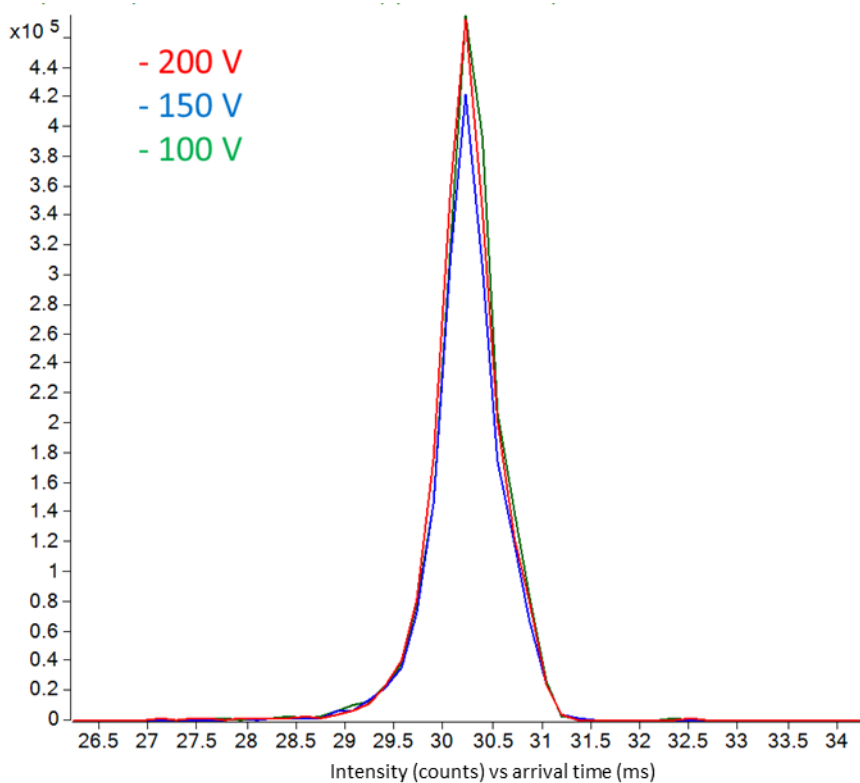

**Fig. S38:** overlaid IMS ATDs of unlabeled standard **9** as  $[M-2H]^{2-}$  ions, obtained at different RF voltages (100V pictured in green, 150V in blue, and 200V in red)

## SUPPORTING INFORMATION

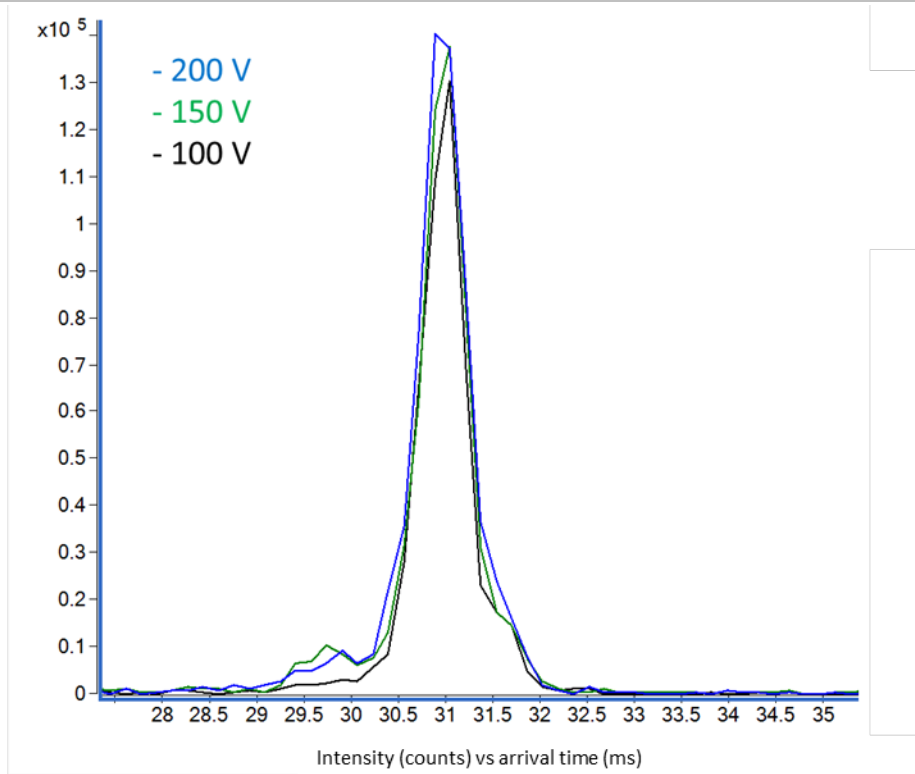

**Fig. S39:** overlaid IMS ATDs of 2-AA labelled standard 9 as  $[M-2H]^{2-}$  ions, obtained at different RF voltages (100V pictured in green, 150V in blue, and 200V in red)

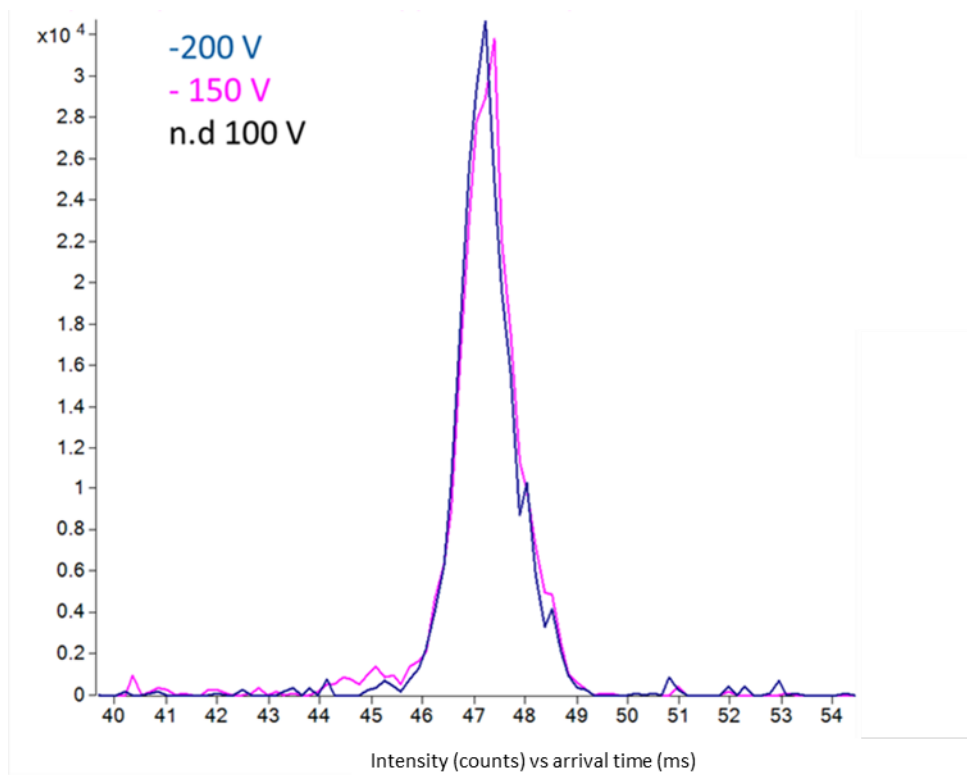

**Fig. S40:** overlaid IMS ATDs of unlabeled standard 10 as  $[M-H]^{-}$  ions, obtained at different RF voltages (100V was not detected, 150V in pink, and 200V in blue)

## SUPPORTING INFORMATION

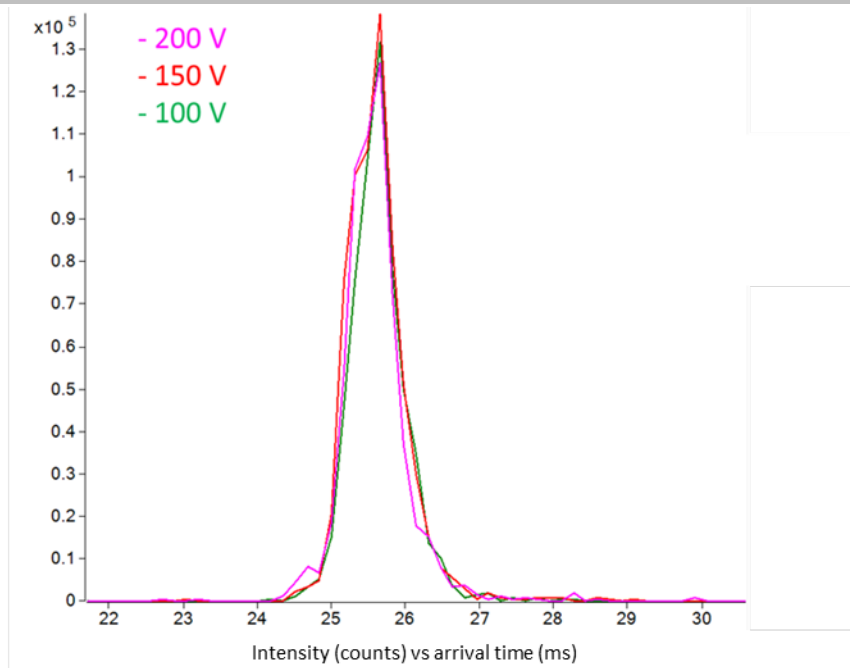

**Fig. S41:** overlaid IMS ATDs of unlabeled standard **10** as  $[M-2H]^{2-}$  ions, obtained at different RF voltages (100V pictured in green, 150V in red, and 200V in pink)

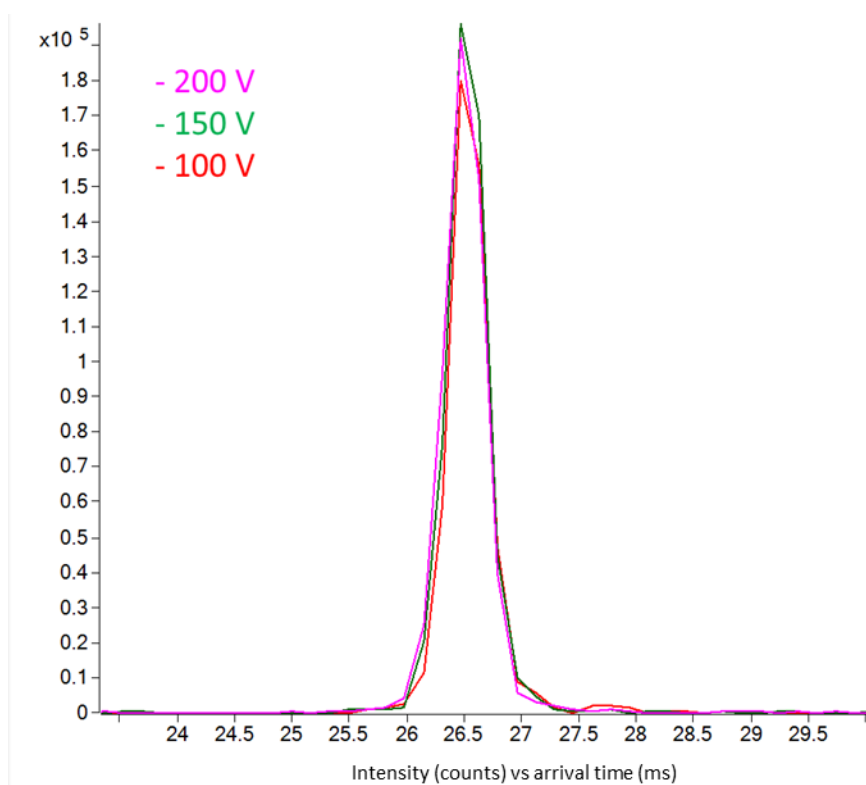

**Fig. S42:** overlaid IMS ATDs of 2-AA labelled standard **10** as  $[M-2H]^{2-}$  ions, obtained at different RF voltages (100V pictured in red, 150V in green, and 200V in pink)

## SUPPORTING INFORMATION

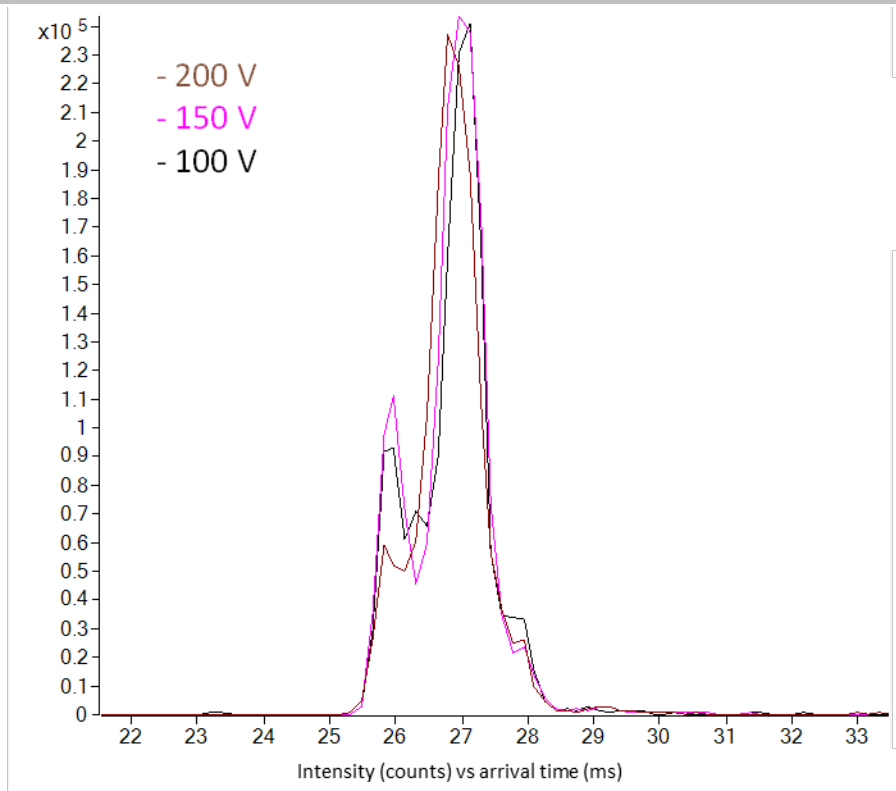

**Fig. S43:** Overlaid IMS ATDs of unlabeled standard **11** as  $[M-2H]^{2-}$  ions, obtained at different RF voltages (100V in black, 150V in pink and 200V in brown)

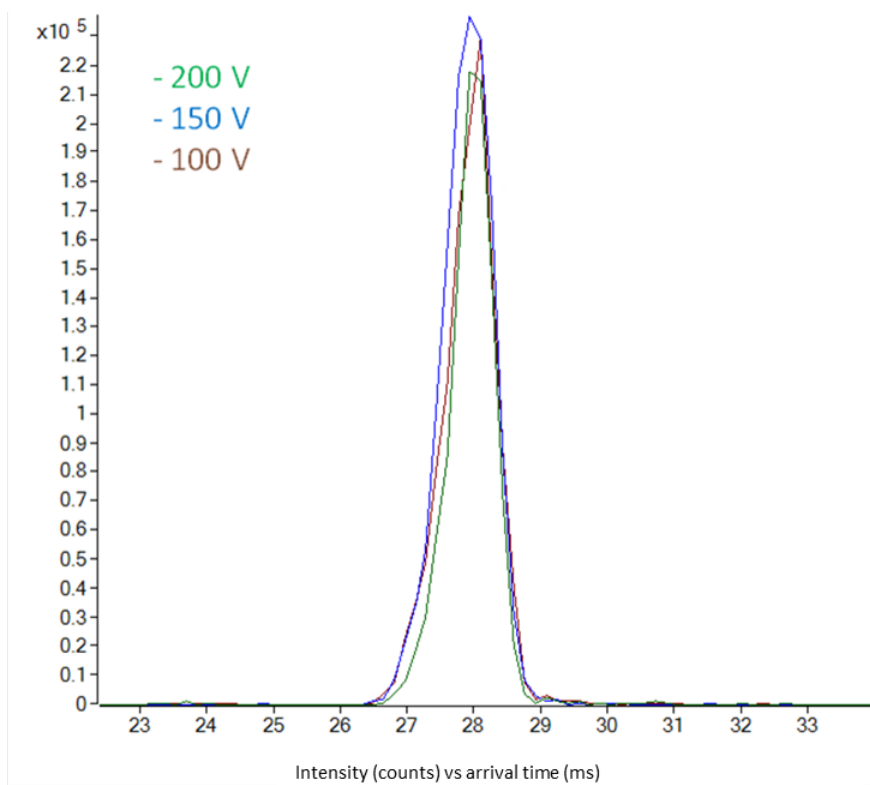

**Fig. S44:** Overlaid IMS ATDs of 2-AA labelled standard **11** as  $[M-2H]^{2-}$  ions, obtained at different RF voltages (100V in brown, 150V in blue and 200V in green)

## SUPPORTING INFORMATION

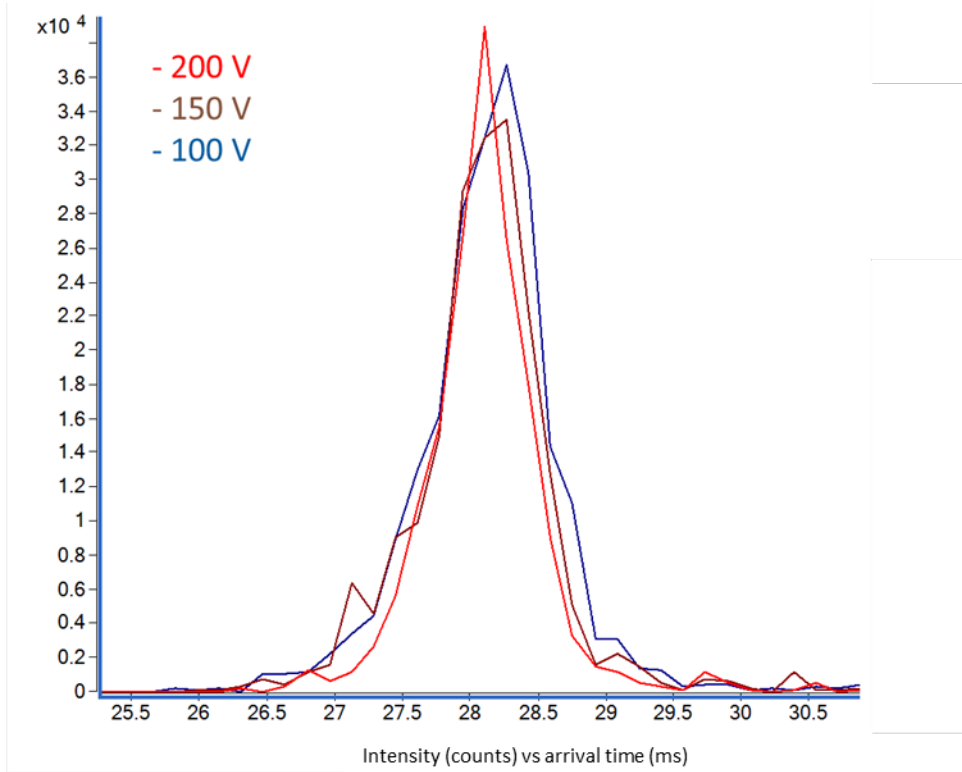

**Fig. S45:** overlaid IMS ATDs of unlabeled standard 12 as  $[M-2H]^{2-}$  ions, obtained at different RF voltages (100V in blue, 150V in brown, and 200V in red)

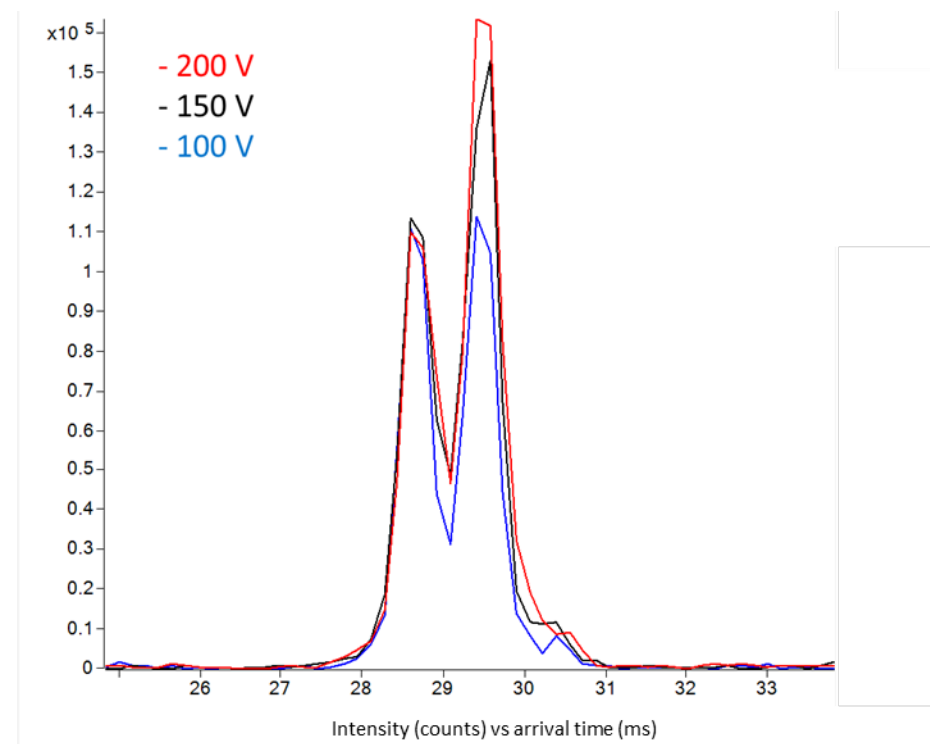

**Fig. S46:** overlaid IMS ATDs of 2-AA labelled standard 12 as  $[M-2H]^{2-}$  ions, obtained at different RF voltages (100V pictured in blue, 150V in black, and 200V in red)

## SUPPORTING INFORMATION

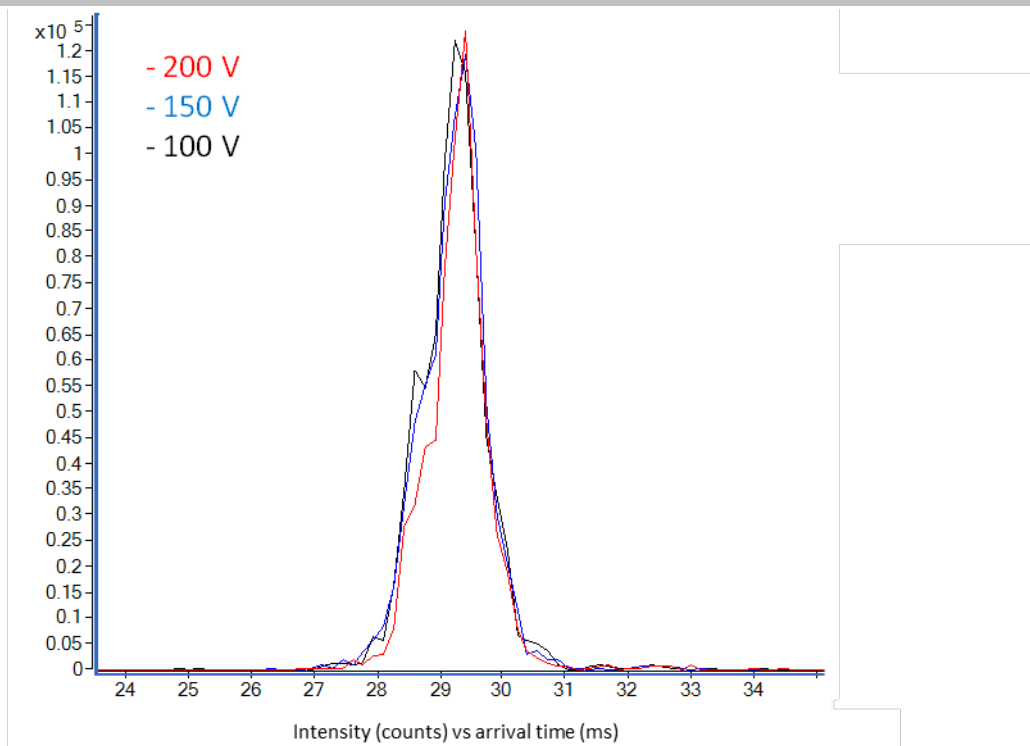

**Fig. S47:** Overlaid IMS ATDs of unlabeled standard 13 as  $[M-2H]^{2-}$  ions, obtained at different RF voltages (100V in black, 150V in blue and 200V in red)

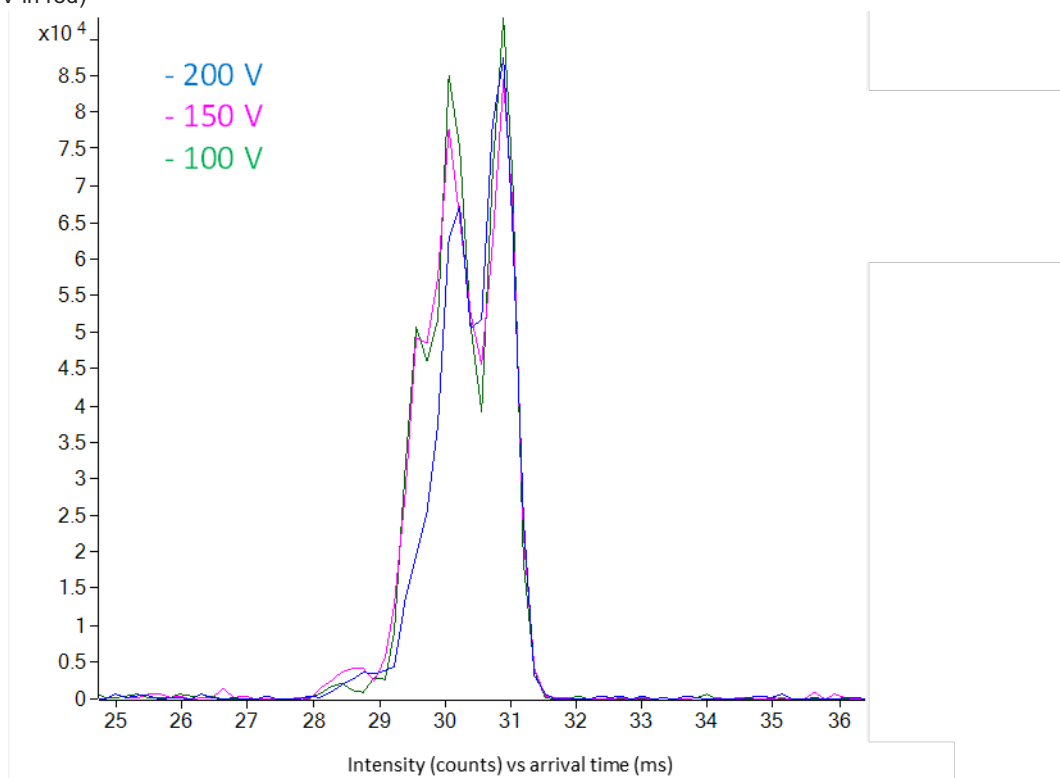

**Fig. S48:** Overlaid IMS ATDs of 2-AA labelled standard 13 as  $[M-2H]^{2-}$  ions, obtained at different RF voltages (100V in green, 150V in pink and 200V in blue)

## SUPPORTING INFORMATION

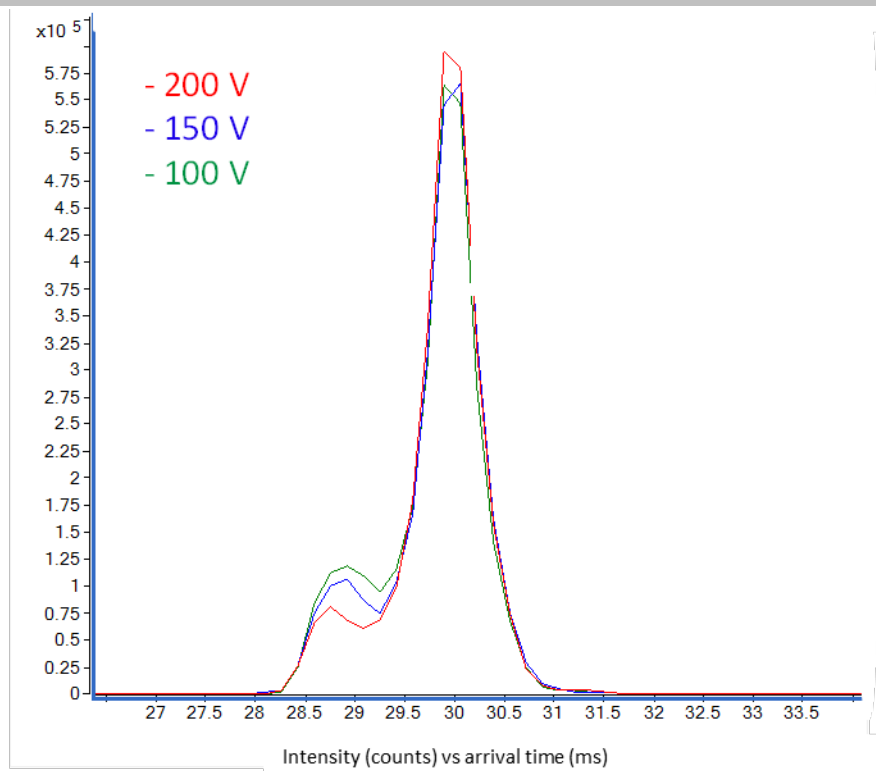

**Fig. S49:** Overlaid IMS ATDs of unlabeled standard **14** as  $[M-2H]^{2-}$  ions, obtained at different RF voltages (100V pictured in green, 150V in blue, and 200V in red)

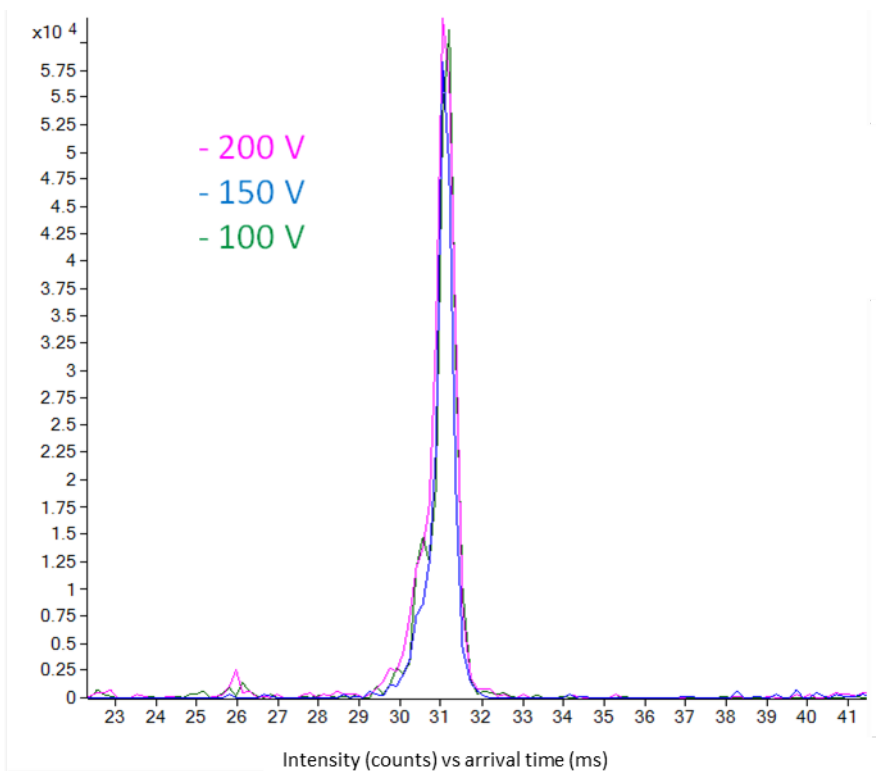

**Fig. S50:** Overlaid IMS ATDs of 2-AA labelled standard **14** as  $[M-2H]^{2-}$  ions, obtained at different RF voltages (100V pictured in green, 150V in blue, and 200V in pink)



## SUPPORTING INFORMATION

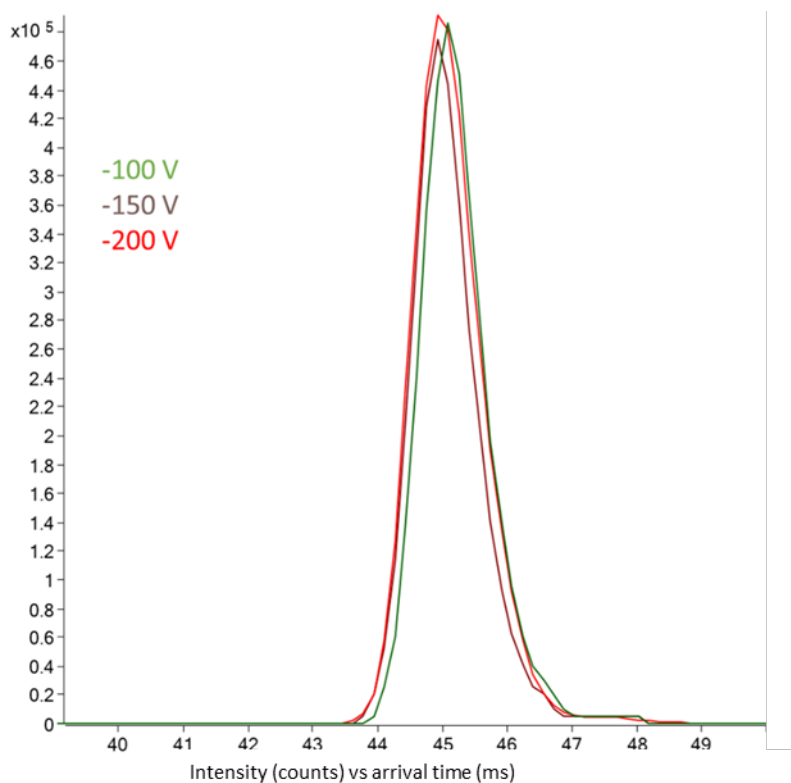

**Fig. S51:** Overlaid IMS ATDs of 2-AA labelled standard **15** as  $[M-2H]^{2-}$  ions, obtained at different RF voltages (100V pictured in green, 150V in brown, and 200V in red)

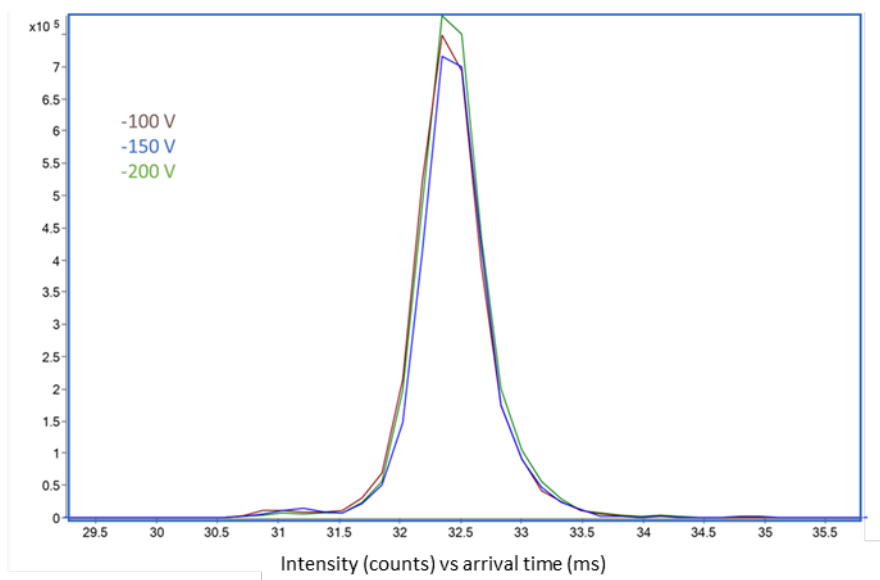

**Fig. S52:** Overlaid IMS ATDs of 2-AA labelled standard **15** as  $[M-2H]^{2-}$  ions, obtained at different RF voltages (100V pictured in brown, 150V in blue, and 200V in green)

2.3 ATDs of standards at different concentrations

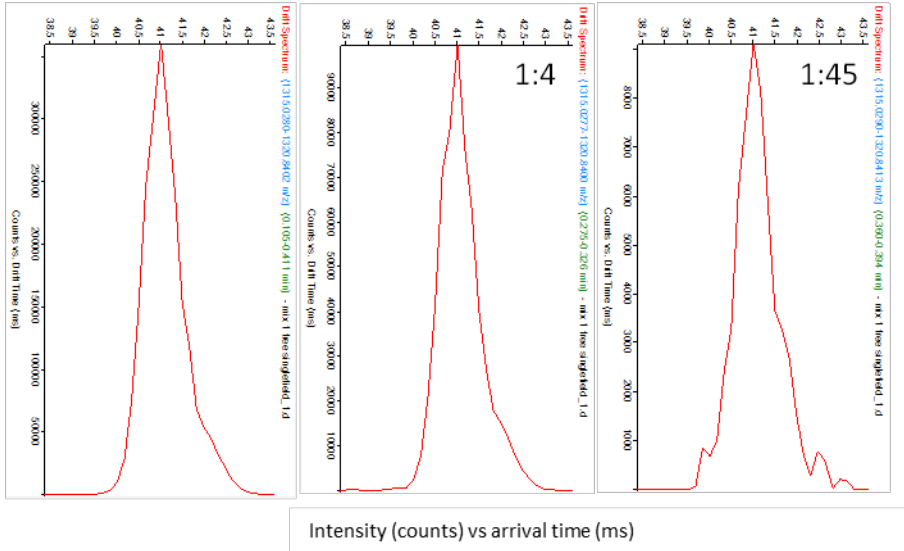

Fig. S53: ATDs of [M-H]<sup>-</sup> ions of unlabeled standard **1** at different dilutions (relatively 1, 1:4 and 1:45)

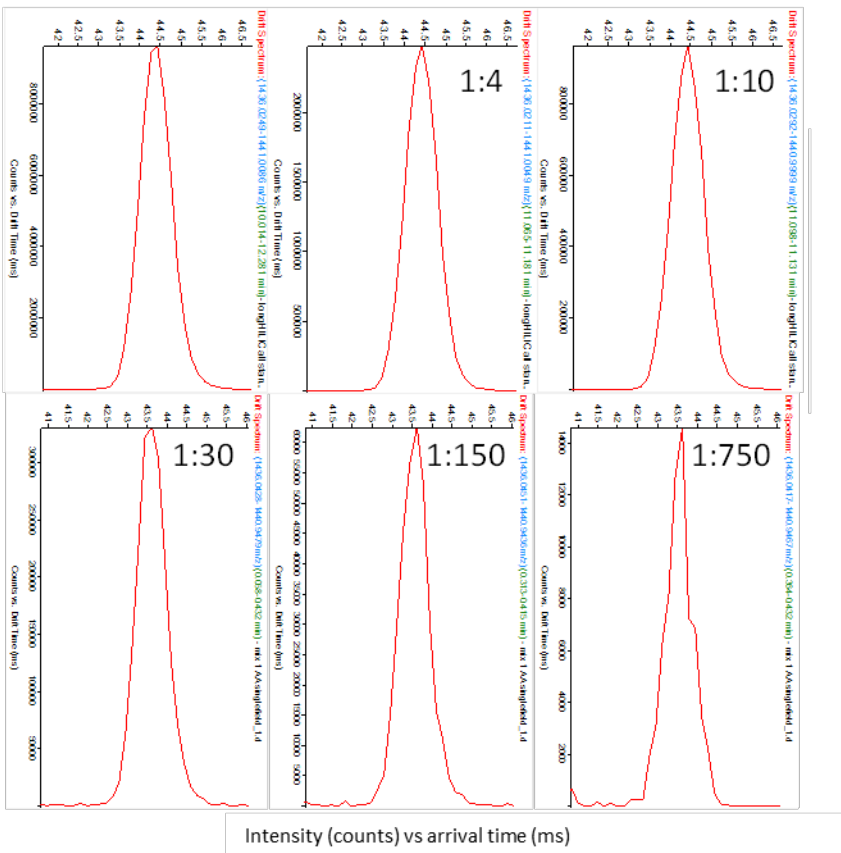

Fig. S54: ATDs of [M-H]<sup>-</sup> ions of 2-AA labeled standard **1** at different dilutions (relatively 1, 1:4, 1:10, 1:30, 1:50 and 1:750)

# SUPPORTING INFORMATION

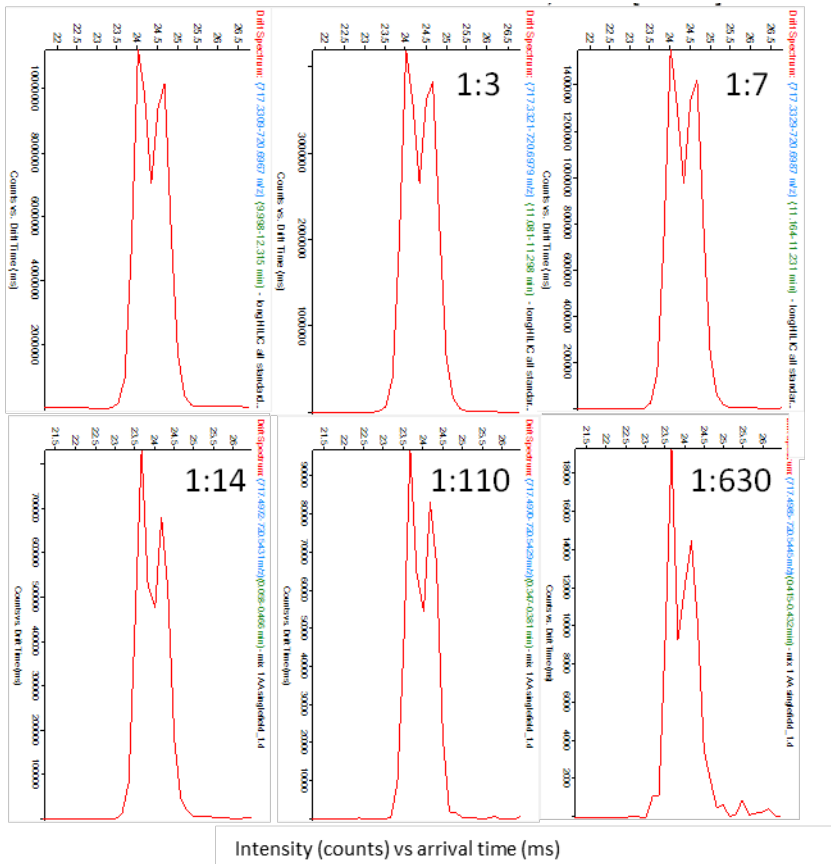

**Fig. S55:** ATDs of  $[M-2H]^{2-}$  ions of 2-AA labeled standard **1** at different dilutions (relatively 1, 1:3, 1:7, 1:14, 1:110 and 1:630)

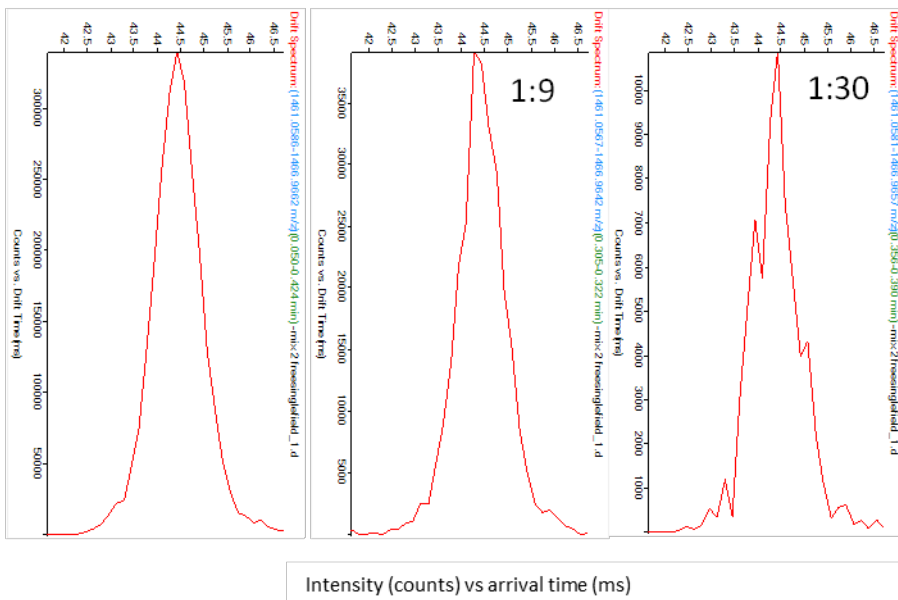

**Fig. S56:** ATDS of  $[M-H]^{-}$  ions of unlabeled standard **2** at different dilutions (relatively 1, 1:9 and 1:30)

# SUPPORTING INFORMATION

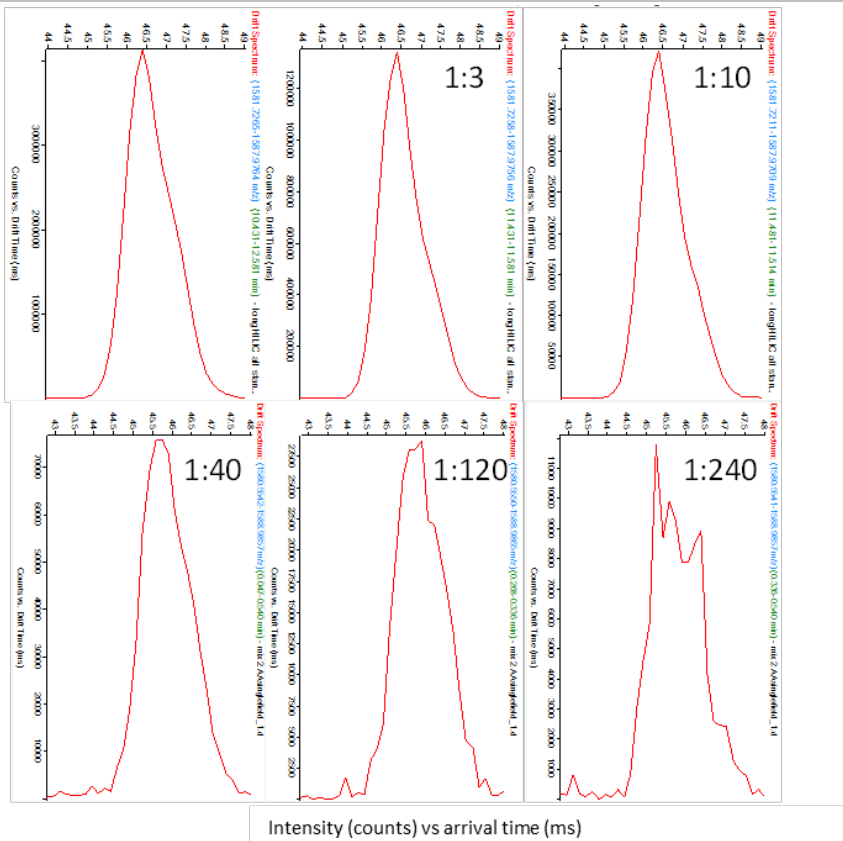

**Fig. S57:** ATDs of  $[M-H]^-$  ions of 2-AA labelled standard **2** at different dilutions (relatively 1, 1:3 and 1:10, 1:40, 1:120 and 1:240)

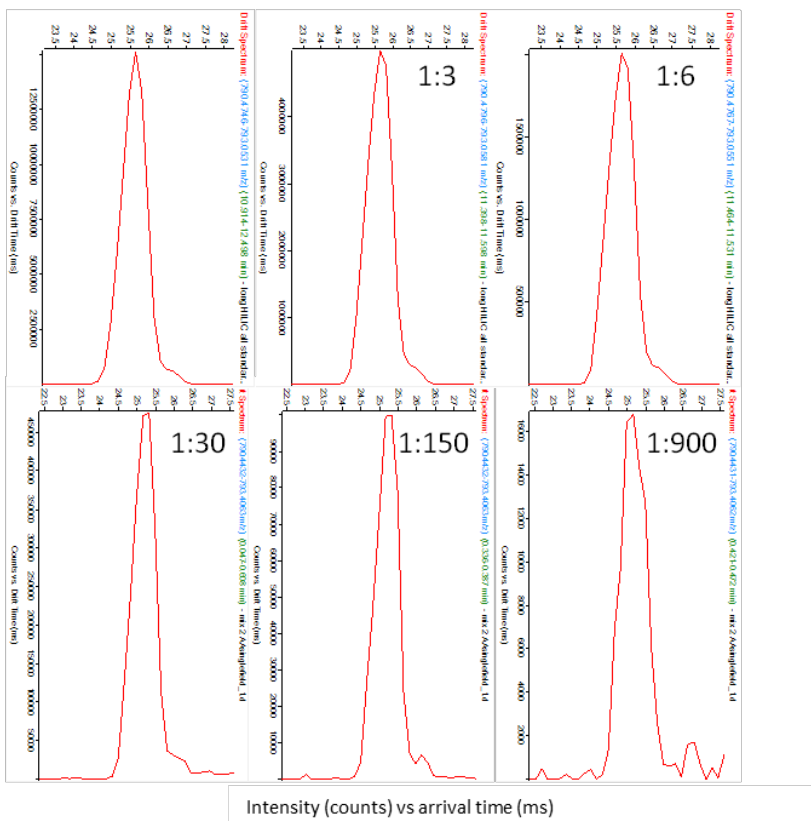

**Fig. S58:** ATDs of  $[M-2H]^{2-}$  ions of 2-AA labelled standard **2** at different dilutions (relatively 1, 1:3, 1:6, 1:30, 1:150 and 1:900)

# SUPPORTING INFORMATION

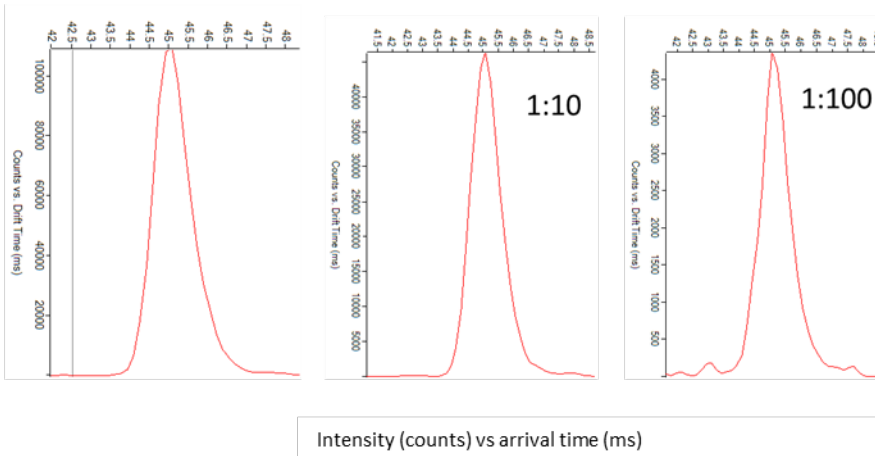

**Fig. S59:** ATDs of  $[M-H]^-$  ions of unlabeled standard **3** at different dilutions (relatively 1, 1:10 and 1:100)

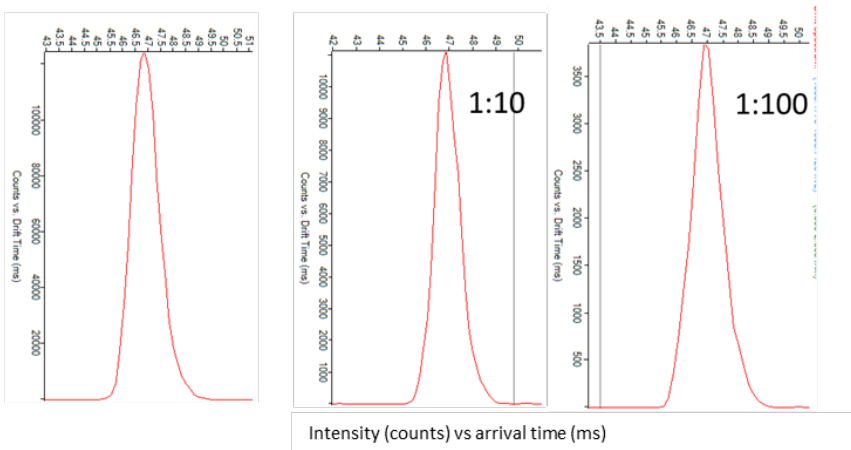

**Fig. S60:** ATDs of  $[M-H]^-$  ions of 2-AA labelled standard **3** at different dilutions (relatively 1, 1:10 and 1:100)

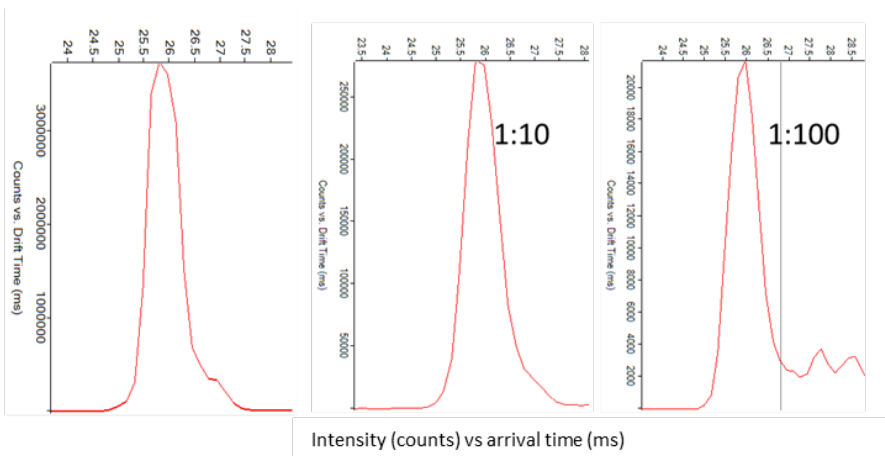

**Fig. S61:** ATDs of  $[M-2H]^{2-}$  ions of 2-AA labelled standard **3** at different dilutions (relatively 1, 1:10 and 1:100)

# SUPPORTING INFORMATION

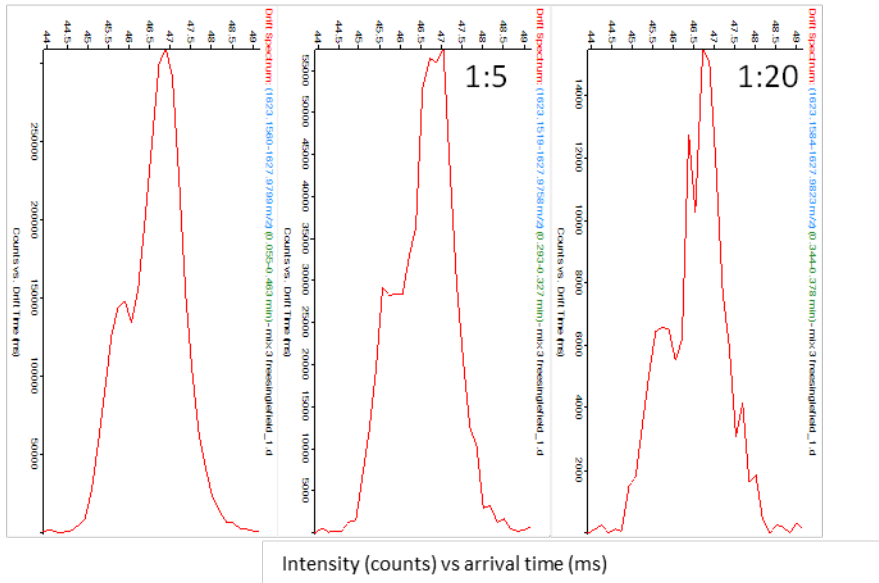

**Fig. S62:** ATDs of  $[M-H]^-$  ions of unlabeled standard 4 at different dilutions (relatively 1, 1:5 and 1:20)

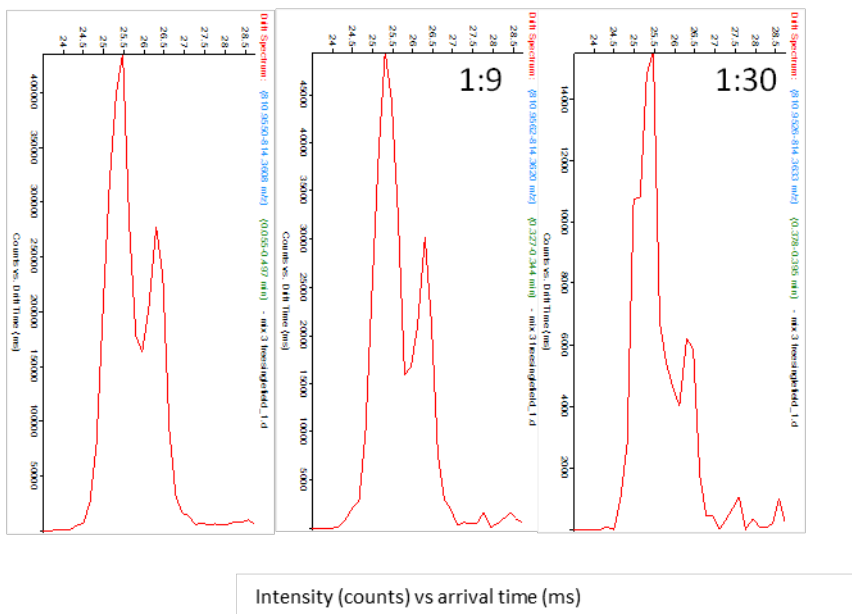

**Fig. S63:** IMS spectra obtained from  $[M-2H]^{2-}$  ions of unlabeled standard 4 at different abundances (relatively 1, 1:9 and 1:30)

# SUPPORTING INFORMATION

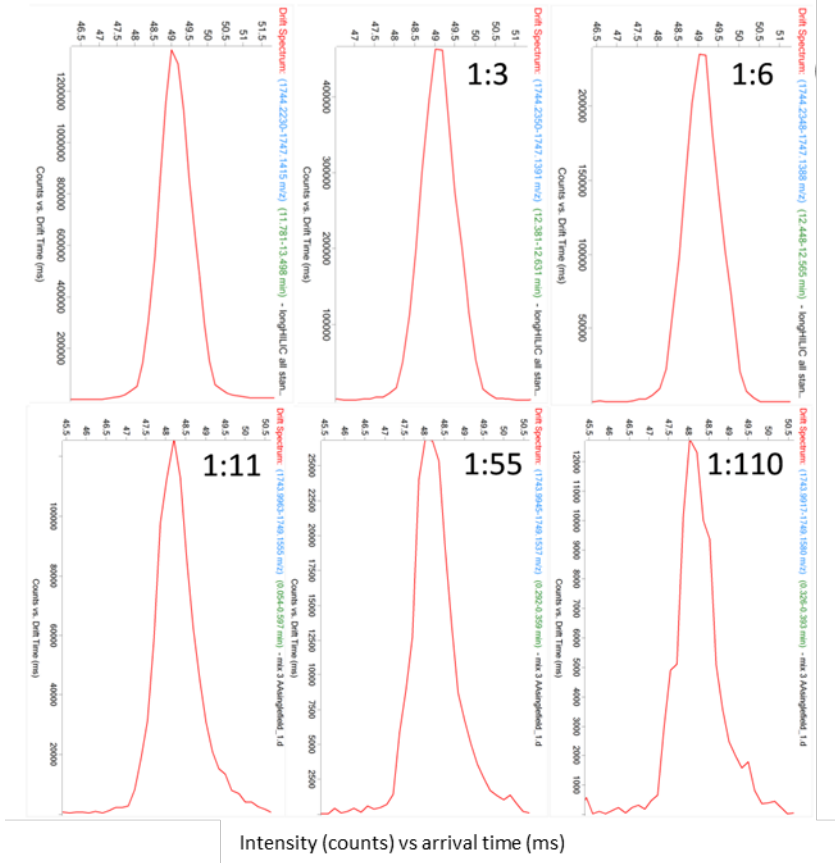

**Fig. S64:** IMS spectra obtained from [M-H]<sup>-</sup> ion of 2-AA standard 4 at different abundances (relatively 1, 1:3, 1:6, 1:11, 1:55 and 1:110)

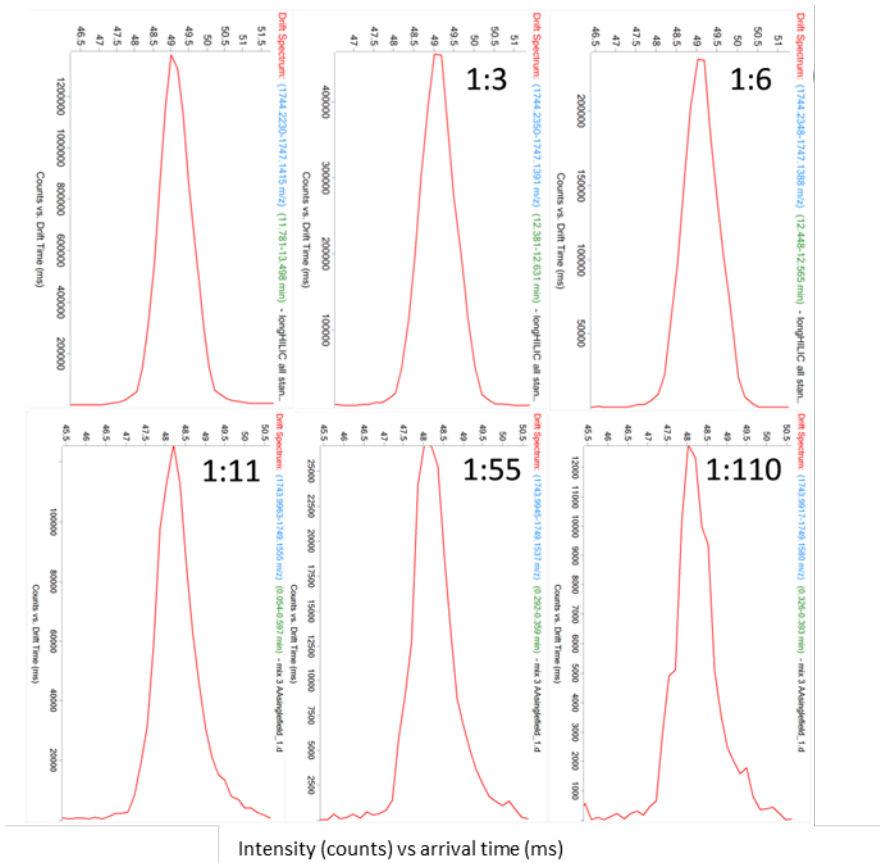

## SUPPORTING INFORMATION

**Fig. S65:** IMS spectra obtained from  $[M-2H]^{2-}$  ion of 2-AA standard **4** at different abundances (relatively 1, 1:2, 1:4, 1:8, 1:240 and 1:1500)

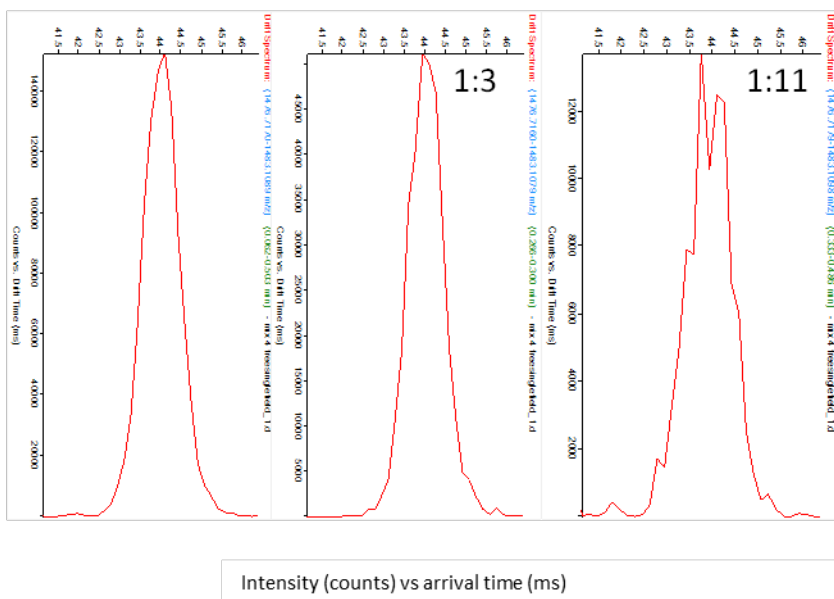

**Fig. S66:** IMS spectra obtained from  $[M-H]^{-}$  ions of unlabeled standard **5** at different abundances (relatively 1, 1:3 and 1:11)

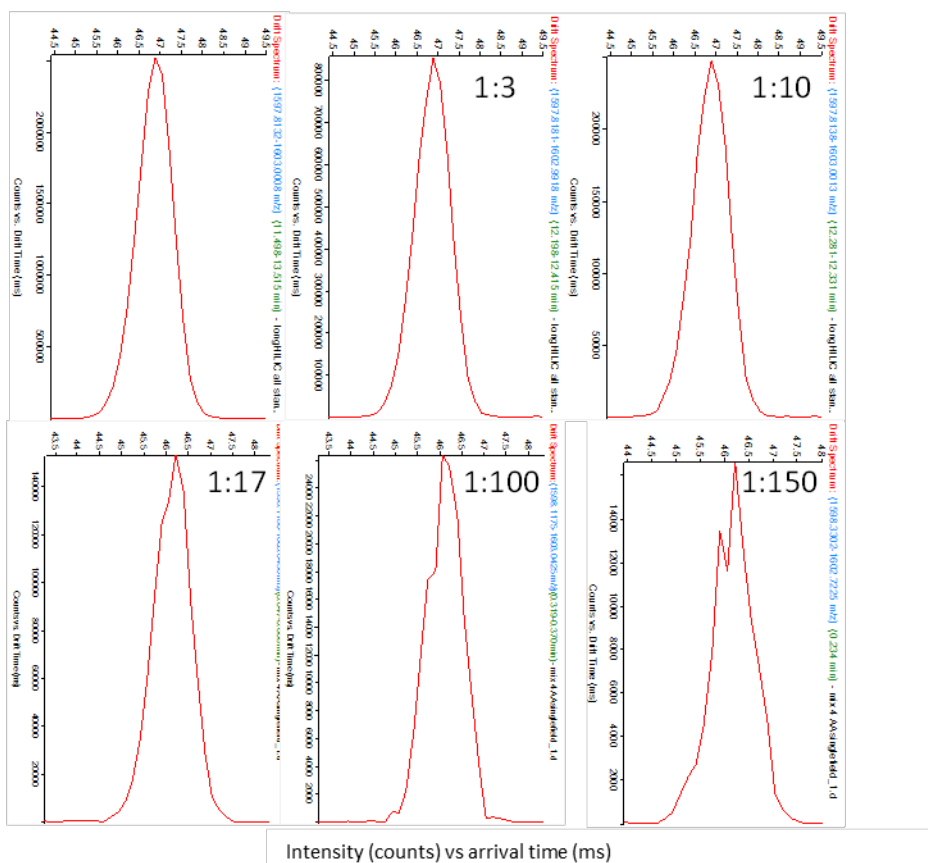

**Fig. S67:** IMS spectra obtained from  $[M-H]^{-}$  ion of 2-AA standard **5** at different abundances (relatively 1, 1:3, 1:10, 1:17, 1:100 and 1:150)



# SUPPORTING INFORMATION

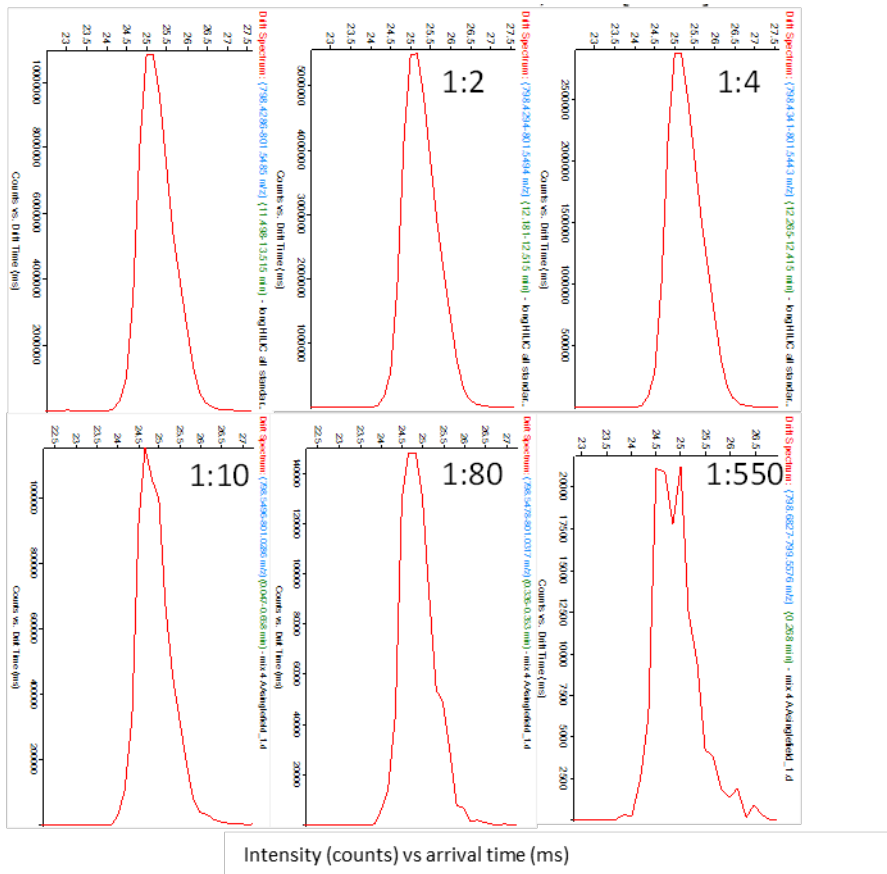

**Fig. S68:** IMS spectra obtained from  $[M-2H]^{2-}$  ion of 2-AA standard **5** at different abundances (relatively 1, 1:2, 1:4, 1:10, 1:80 and 1:550)

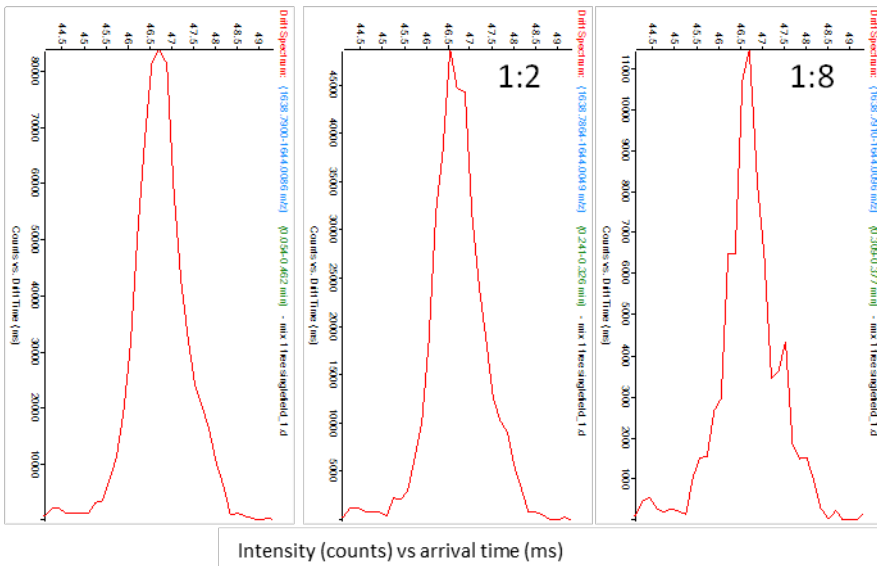

**Fig. S69:** ATDs of  $[M-H]^{-}$  ions of unlabeled standard **6** at different dilutions (relatively 1, 1:2 and 1:8)

# SUPPORTING INFORMATION

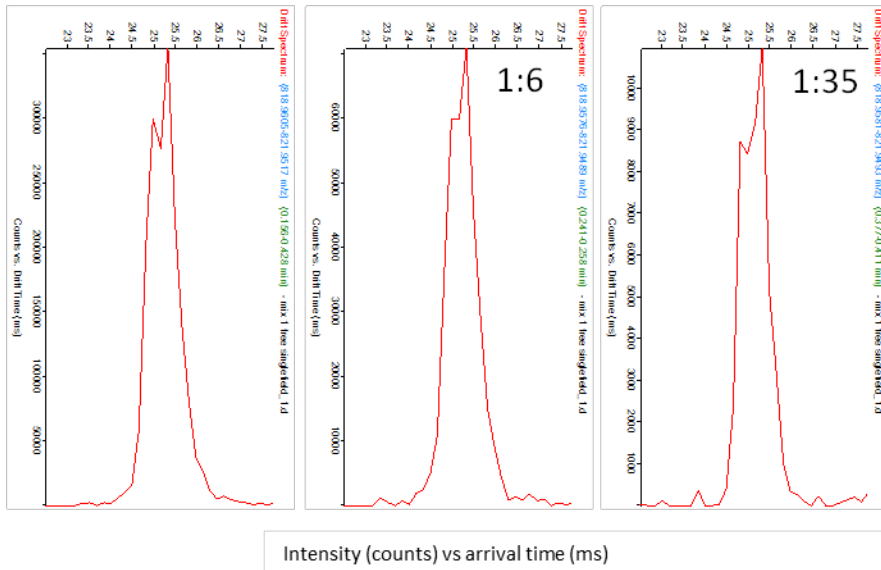

**Fig. S70:** ATDs of  $[M-2H]^{2-}$  ions of unlabeled standard **6** at different dilutions (relatively 1, 1:6 and 1:35)

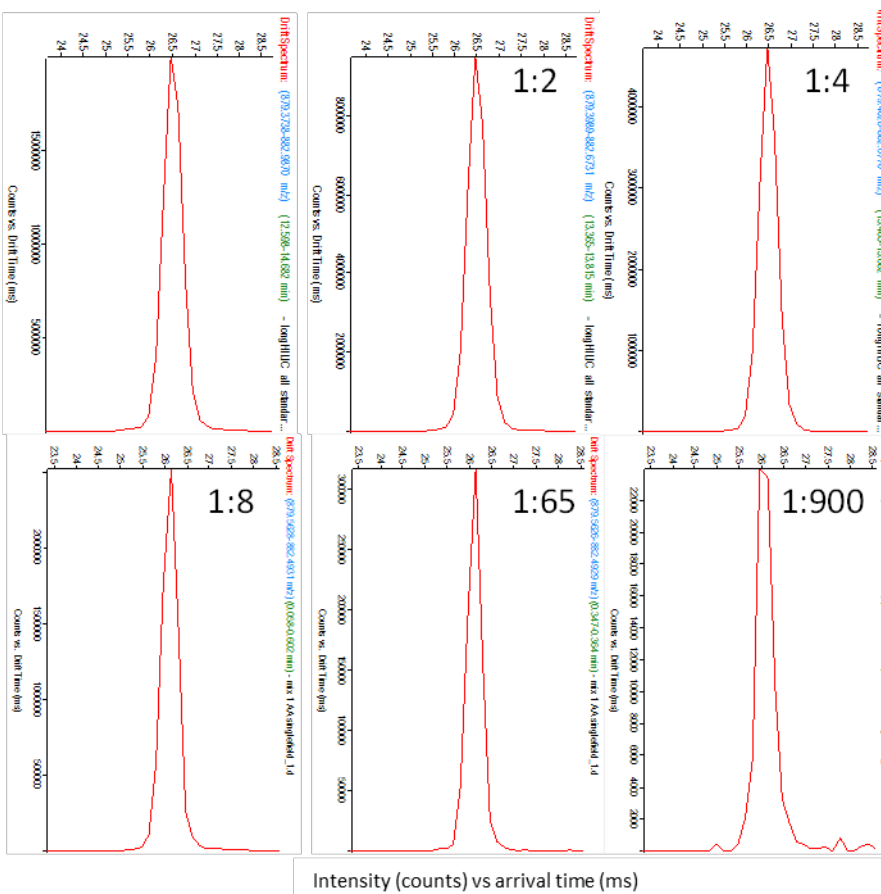

**Fig. S71:** ATDs of  $[M-2H]^{2-}$  ion of 2-AA standard **6** at different dilutions (relatively 1, 1:2, 1:4, 1:8, 1:65 and 1:900)

# SUPPORTING INFORMATION

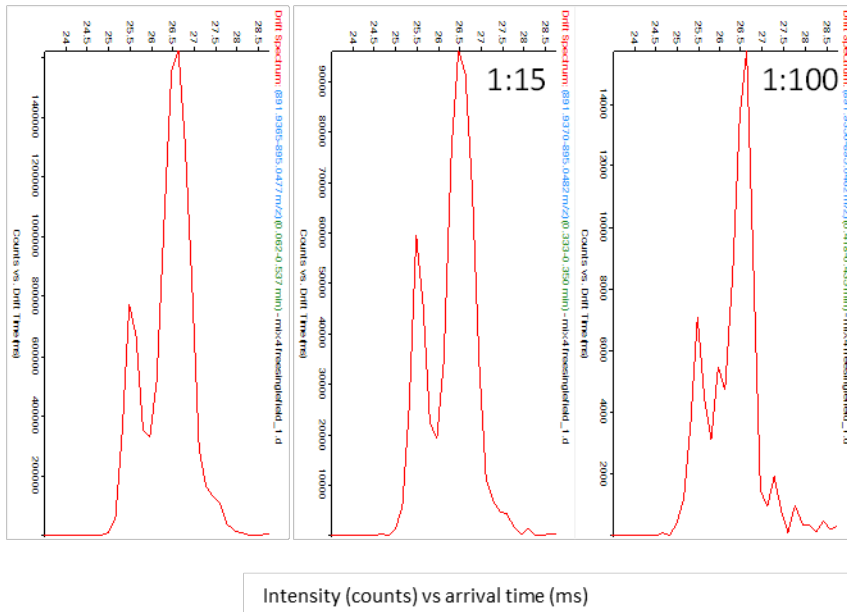

**Fig. S72:** IMS spectra obtained from  $[M-2H]^{2-}$  ions of unlabeled standard 7 at different abundances (relatively 1, 1:15 and 1:100)

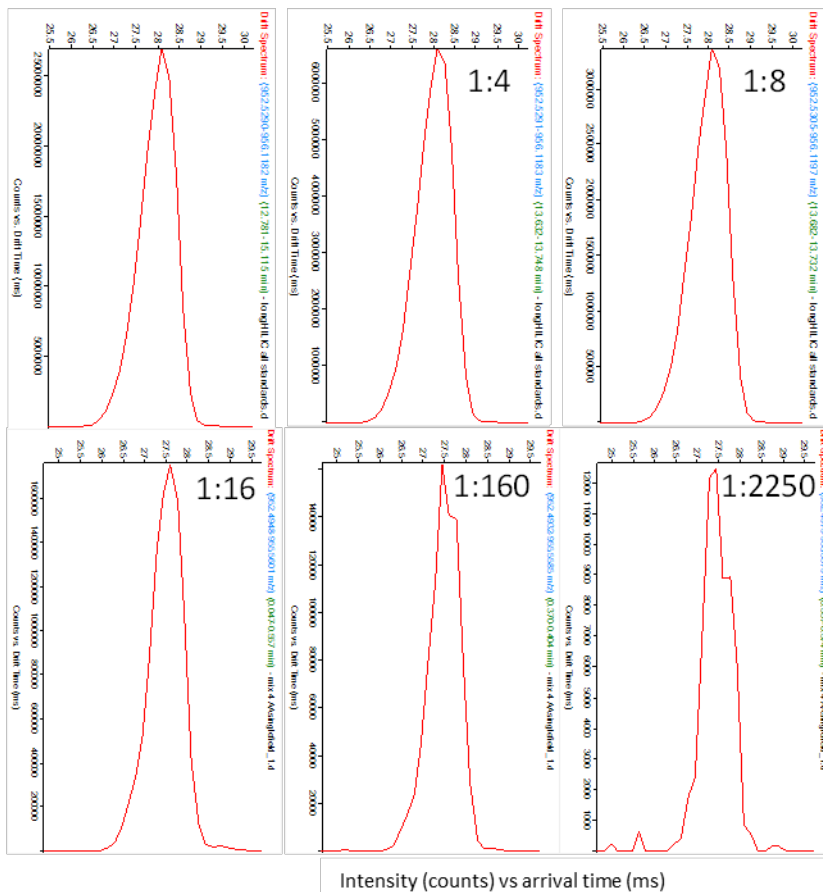

**Fig. S73:** IMS spectra obtained from  $[M-2H]^{2-}$  ion of 2-AA standard 7 at different abundances (relatively 1, 1:14, 1:8, 1:16, 1:160 and 1:2250)

# SUPPORTING INFORMATION

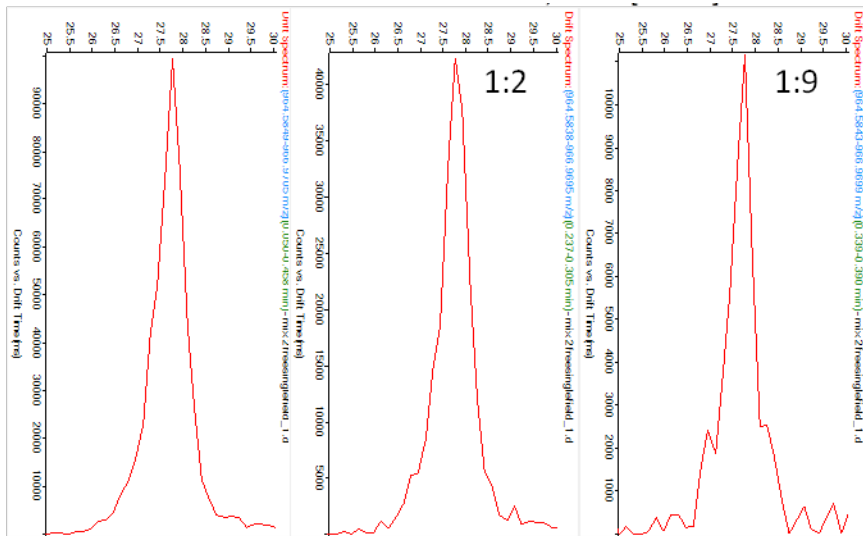

Intensity (counts) vs arrival time (ms)

**Fig. S74:** ATDs of  $[M-2H]^{2-}$  ions of free standard **8** at different dilutions (relatively 1, 1:2 and 1:9)

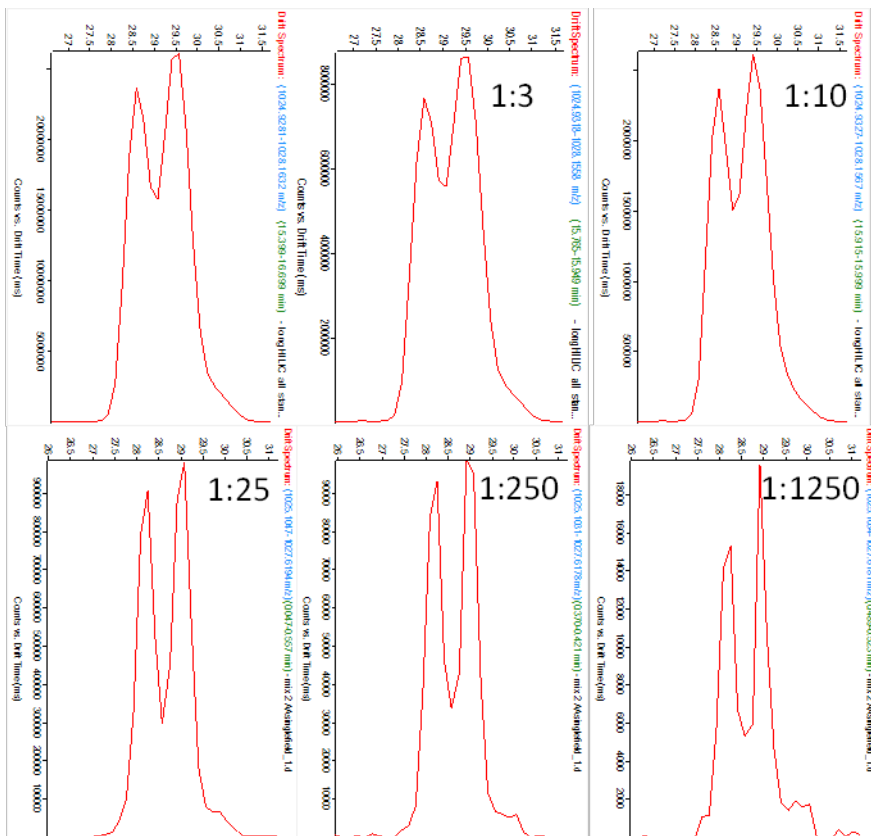

Intensity (counts) vs arrival time (ms)

**Fig. S75:** ATDs of  $[M-2H]^{2-}$  ions of 2-AA labelled standard **8** at different dilutions (relatively 1, 1:3, 1:10, 1:25, 1:250 and 1:1250)

# SUPPORTING INFORMATION

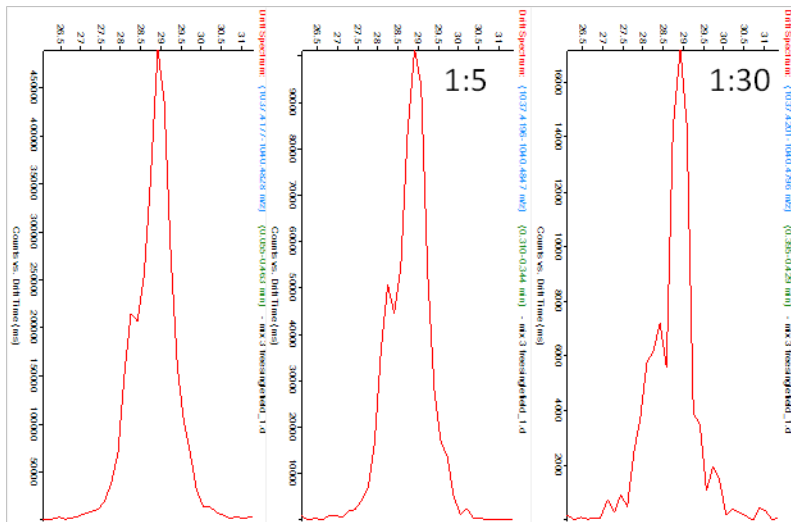

Intensity (counts) vs arrival time (ms)

**Fig. S76:** IMS spectra obtained from  $[M-2H]^{2-}$  ions of unlabeled standard **9** at different abundances (relatively 1, 1:5 and 1:30)

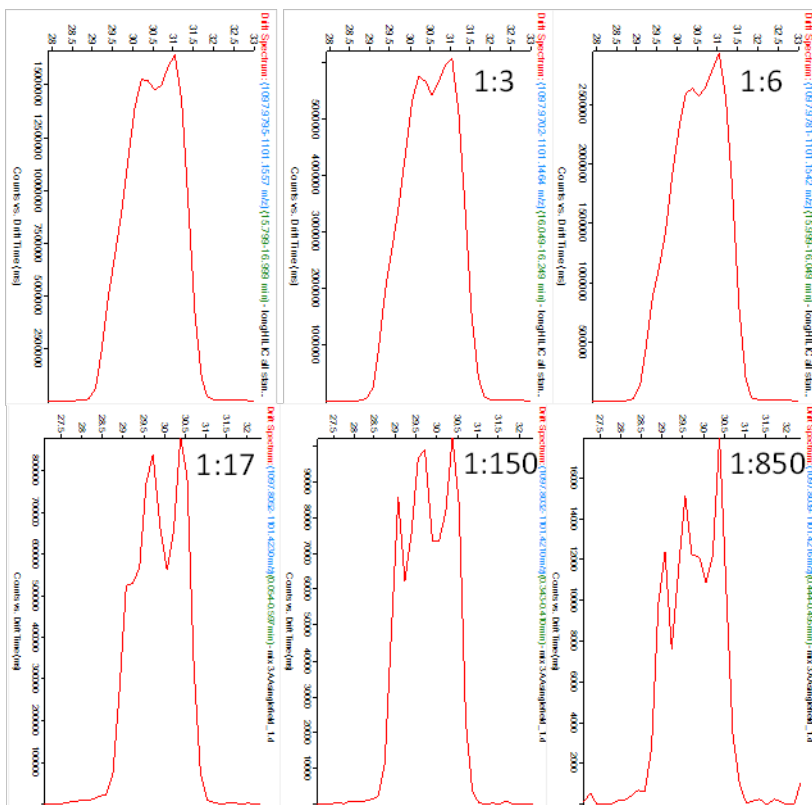

Intensity (counts) vs arrival time (ms)

**Fig. S77:** IMS spectra obtained from  $[M-2H]^{2-}$  ion of 2-AA standard **9** at different abundances (relatively 1, 1:3, 1:6, 1:17, 1:150 and 1:850)

# SUPPORTING INFORMATION

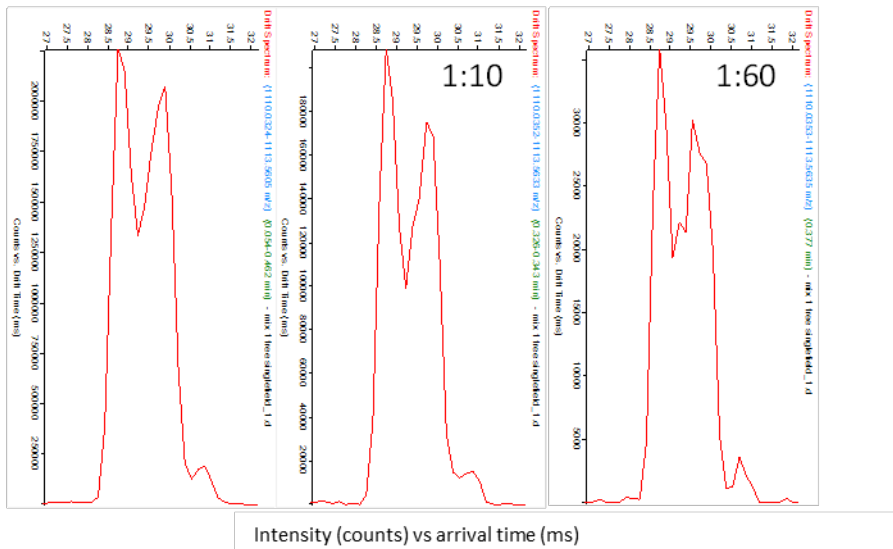

**Fig. S78:** ATDs of  $[M-2H]^{-2}$  ions of unlabeled standard **10** at different dilutions (relatively 1, 1:10 and 1:60)

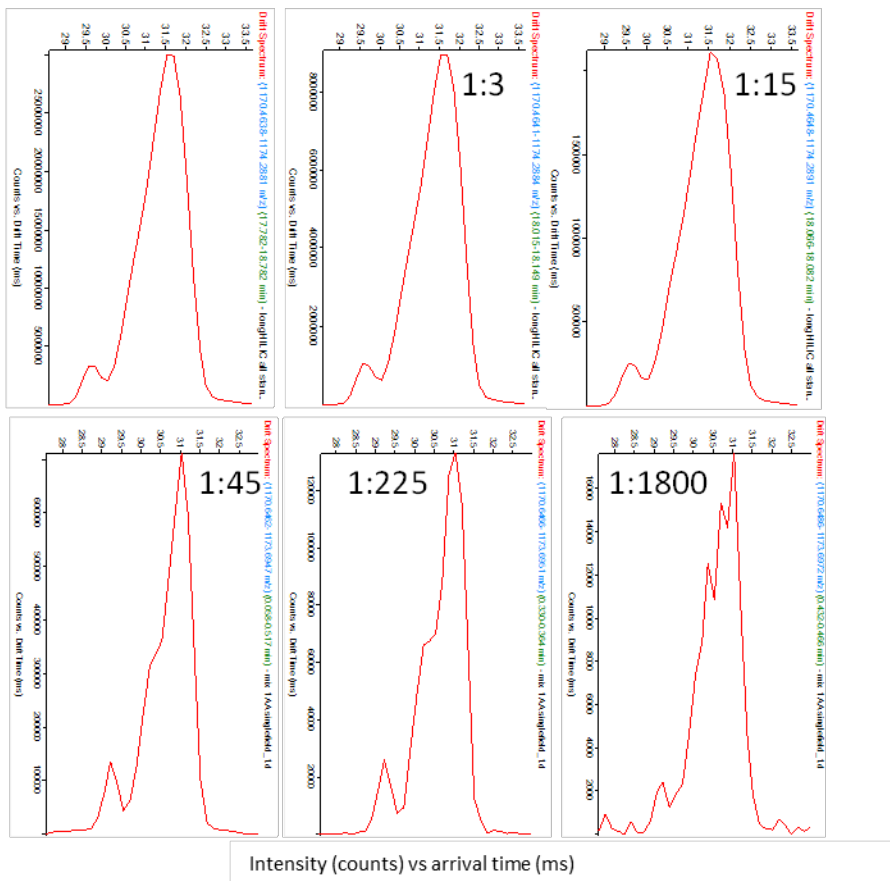

**Fig. S79:** ATDs of  $[M-2H]^{-2}$  ions of 2-AA labeled standard **10** at different dilutions (relatively 1, 1:3, 1:15, 1:45, 1:225 and 1:1800)

# SUPPORTING INFORMATION

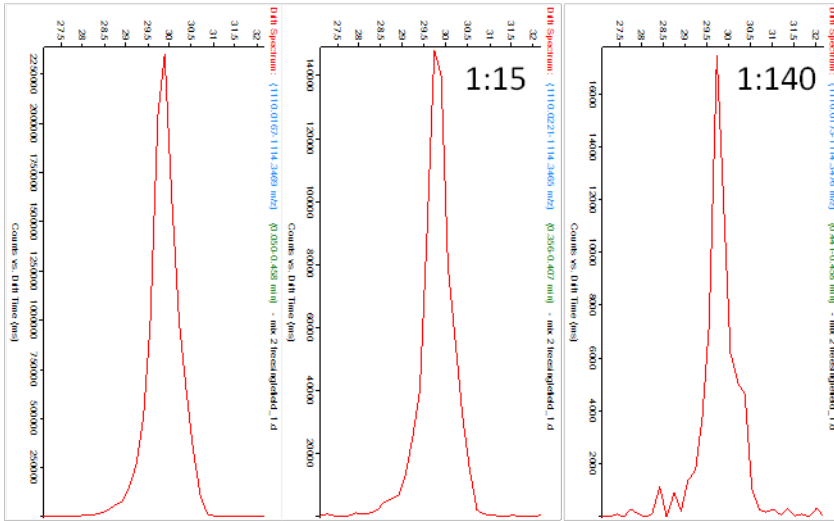

Intensity (counts) vs arrival time (ms)

**Fig. S80:** ATDs of  $[M-2H]^{2-}$  ions of unlabeled standard 11 at different dilutions (relatively 1, 1:15 and 1:140)

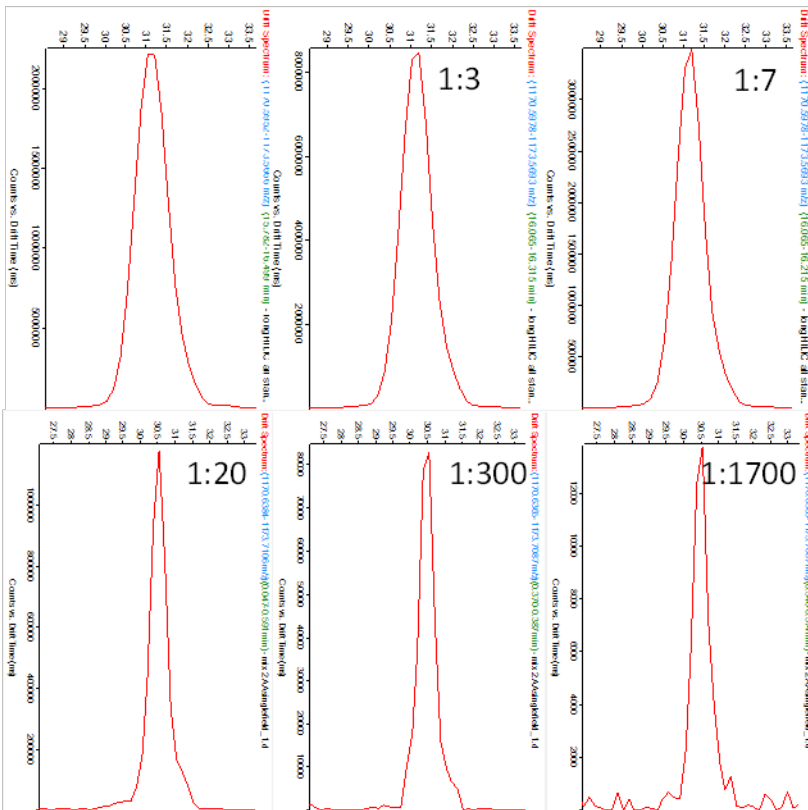

Intensity (counts) vs arrival time (ms)

**Fig. S81:** ATDs of  $[M-2H]^{2-}$  ions of 2-AA labelled standard 11 at different dilutions (relatively 1, 1:3, 1:7, 1:20, 1:300 and 1:1700)

# SUPPORTING INFORMATION

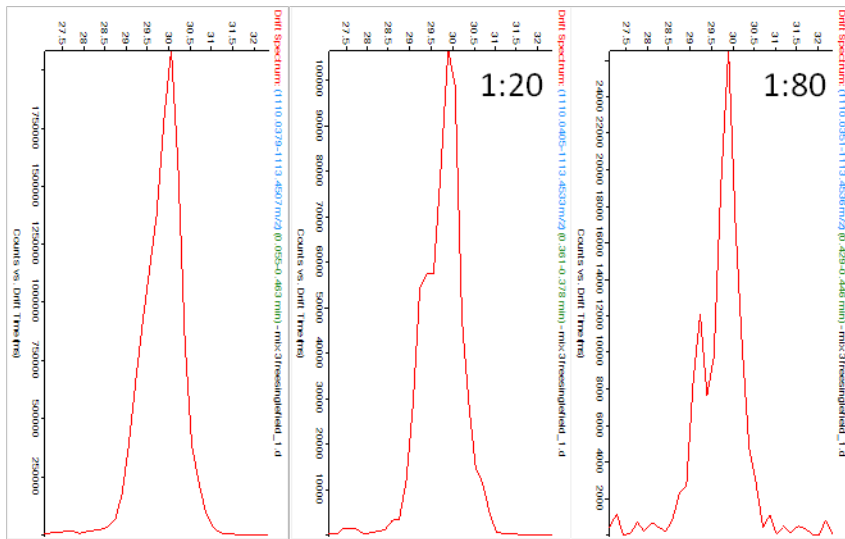

Intensity (counts) vs arrival time (ms)

**Fig. S82:** ATDs of  $[M-2H]^{2-}$  ions of unlabeled standard **12** at different dilutions (relatively 1, 1:20 and 1:80)

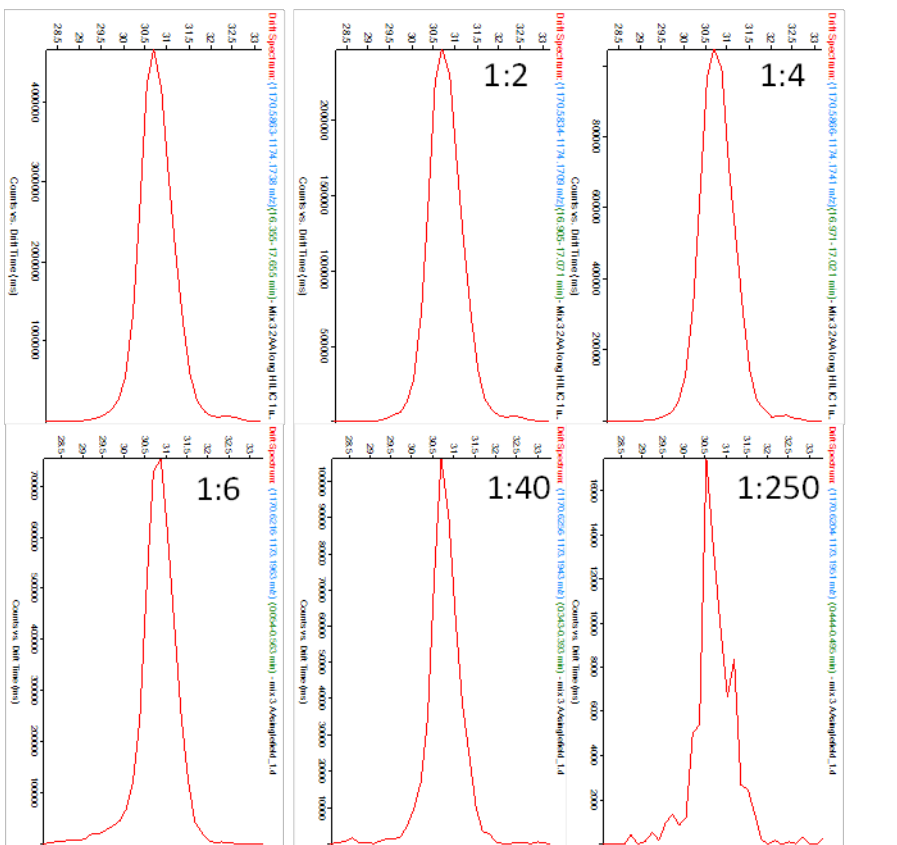

Intensity (counts) vs arrival time (ms)

**Fig. S83:** ATDs of  $[M-2H]^{2-}$  ions of 2-AA labeled standard **12** at different dilutions (relatively 1, 1:2, 1:4, 1:6, 1:40 and 1:250)



# SUPPORTING INFORMATION

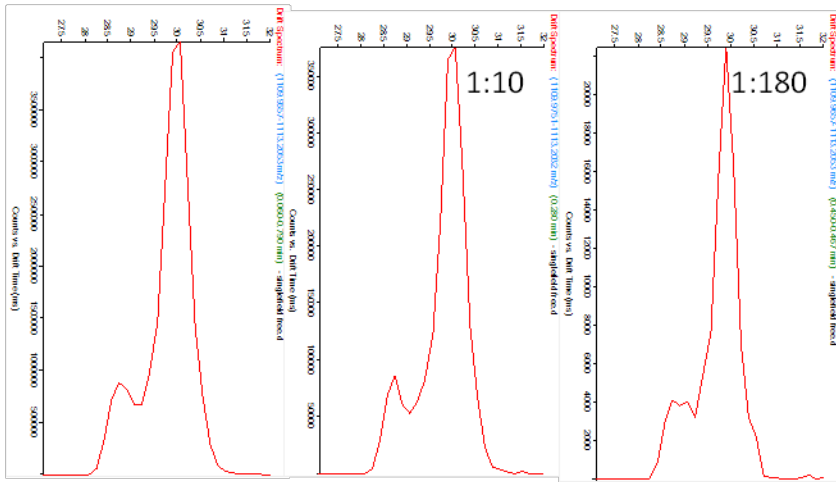

Intensity (counts) vs arrival time (ms)

**Fig. S84:** ATDs of  $[M-2H]^{-2}$  ions of unlabeled standard **13** at different dilutions (relatively 1, 1:10 and 1:180)

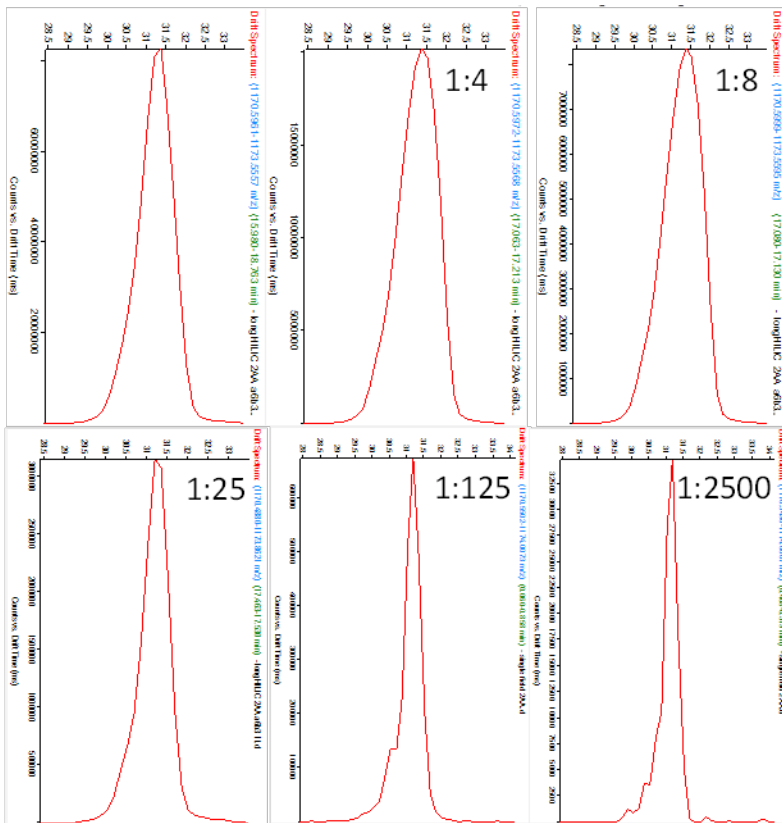

Intensity (counts) vs arrival time (ms)

**Fig. S85:** ATDs of  $[M-2H]^{-2}$  ions of 2-AA labelled standard **13** at different dilutions (relatively 1, 1:4, 1:8, 1:25, 1:125 and 1:2500)

# SUPPORTING INFORMATION

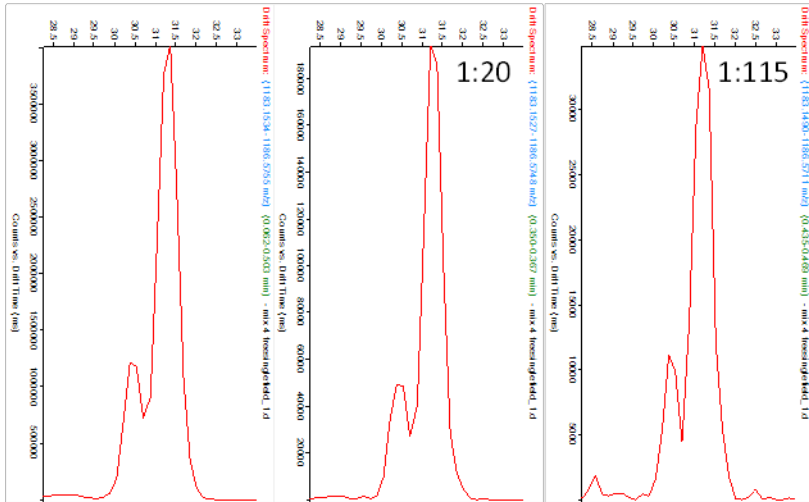

Intensity (counts) vs arrival time (ms)

**Fig. S86:** IMS spectra obtained from  $[M-2H]^{2-}$  ions of unlabeled standard **14** at different abundances (relatively 1, 1:20 and 1:115)

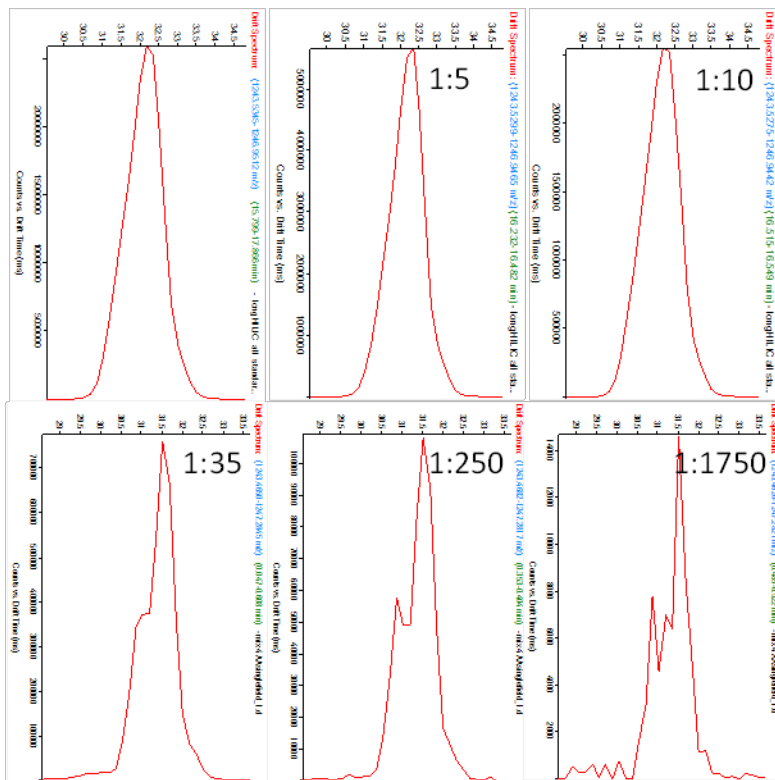

Intensity (counts) vs arrival time (ms)

**Fig. S87:** IMS spectra obtained from  $[M-2H]^{2-}$  ion of 2-AA standard **14** at different abundances (relatively 1, 1:7 and 1:50)

## SUPPORTING INFORMATION

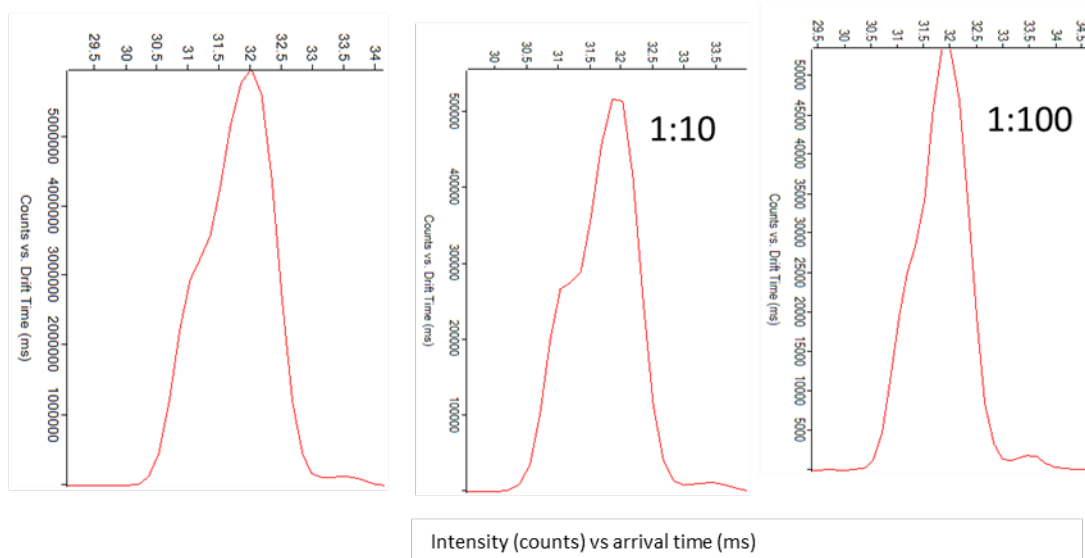

**Fig. S88:** IMS spectra obtained from  $[M-2H]^{2-}$  ion of unlabeled standard **15** at different abundances (relatively 1, 1:7 and 1:50)

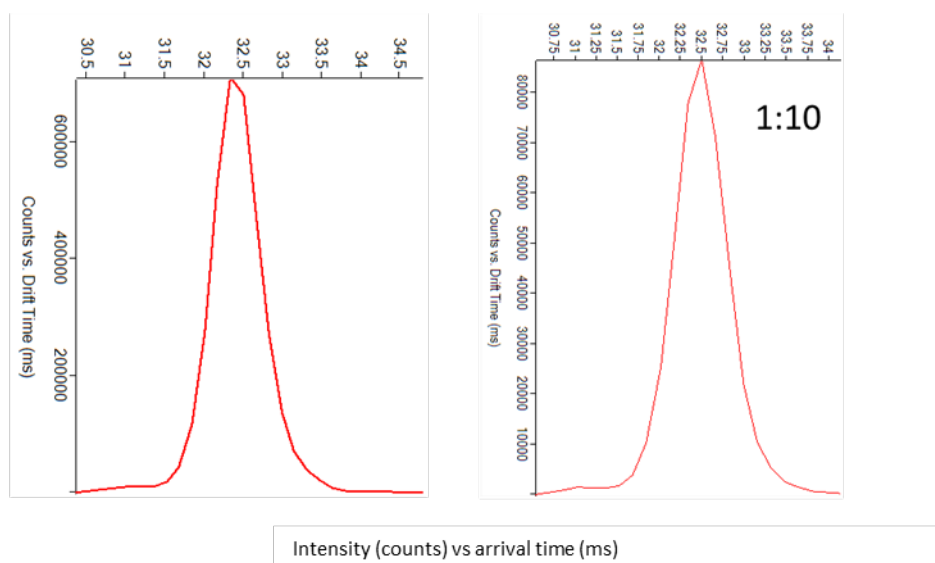

**Fig. S89:** IMS spectra obtained from  $[M-2H]^{2-}$  ion of 2-AA labelled standard **15** at different abundances (relatively 1, 1:7 and 1:50)

## 2.4 Effect of solvent composition (ACN:water ratio) on gas phase conformation of unlabeled standards

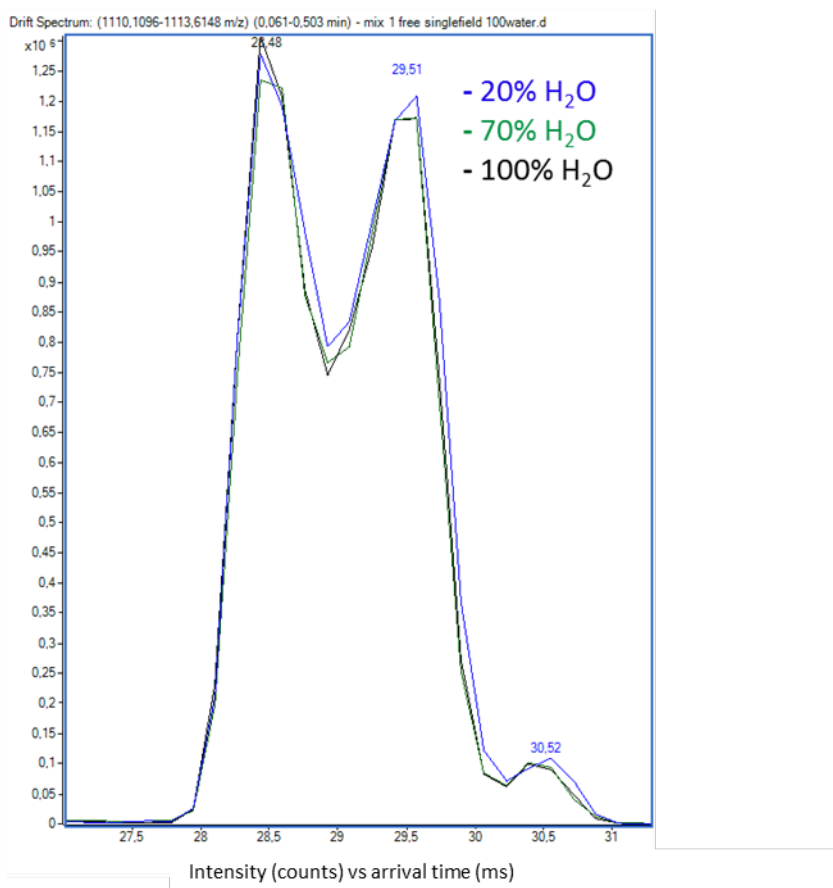

**Fig. S90:** ATD obtained from  $[M-2H]^{2-}$  ions of unlabeled standard **10** at different ACN:H<sub>2</sub>O solvent ratios (20% H<sub>2</sub>O in blue, 70% H<sub>2</sub>O in green and 100% H<sub>2</sub>O in black)

## SUPPORTING INFORMATION

### 2.5 ATDs of HILIC-separated anomers of standards

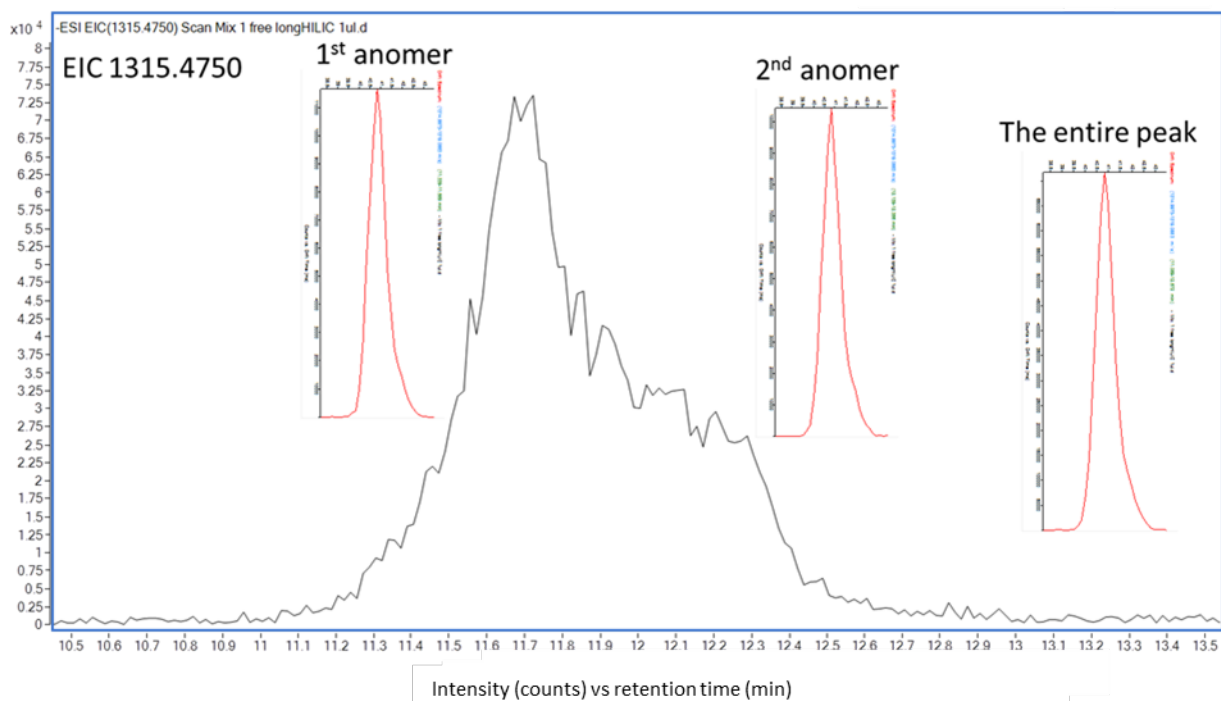

**Fig. S91:** ATDs (in red) from  $[M-H]^-$  ions of unlabeled standard 1 anomers separated by HILIC (in black). A summed ATD of both anomers is shown on the right

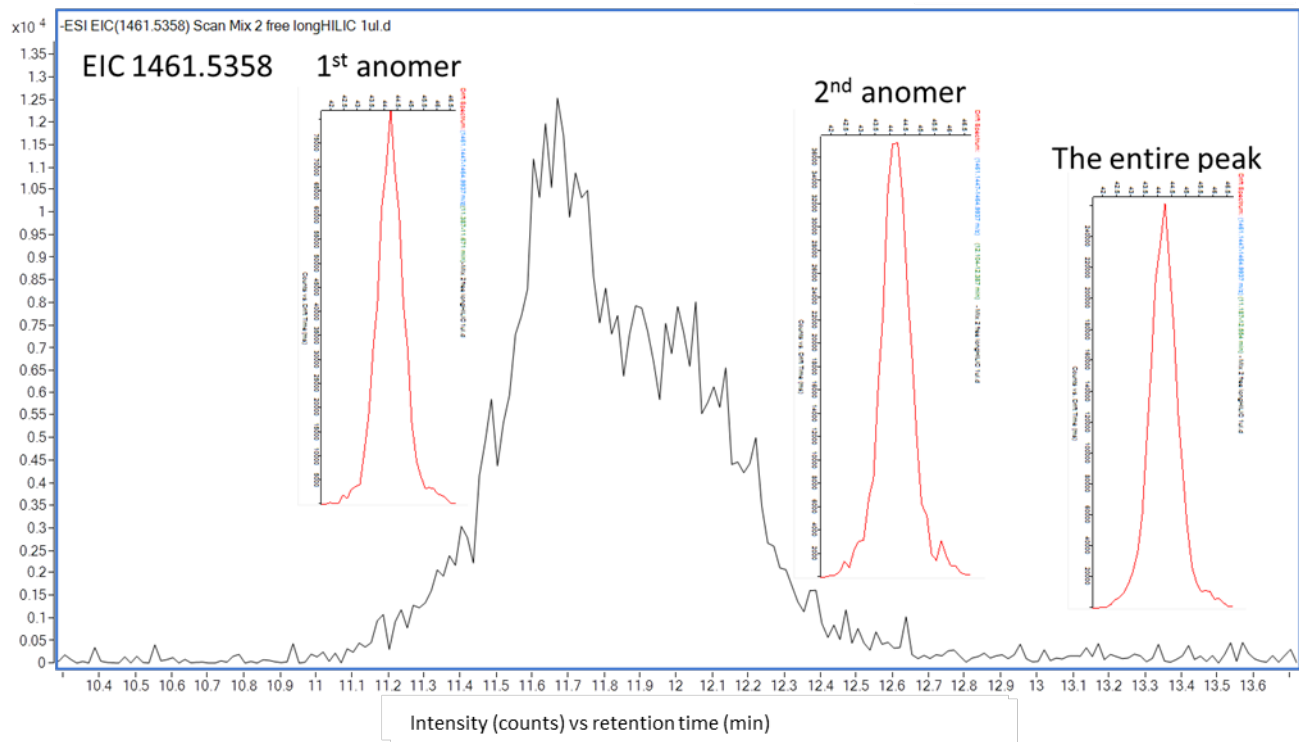

**Fig. S92:** ATD from  $[M-H]^-$  ions of unlabeled standard 2 anomers separated by HILIC (in black). A summed ATD of both anomers is shown on the right

## SUPPORTING INFORMATION

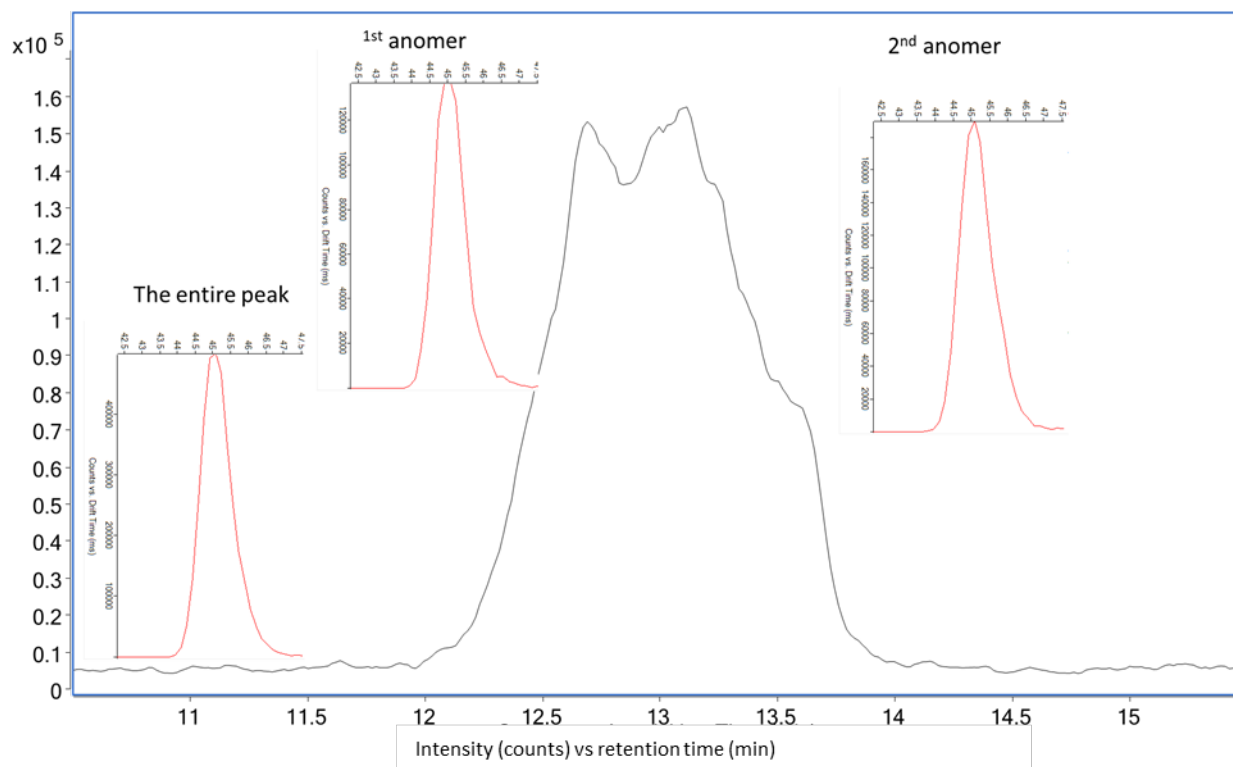

**Fig. S93:** ATD from  $[M-H]^-$  ions of unlabeled standard **3** anomers separated by HILIC (in black). A summed ATD of both anomers is shown on the right

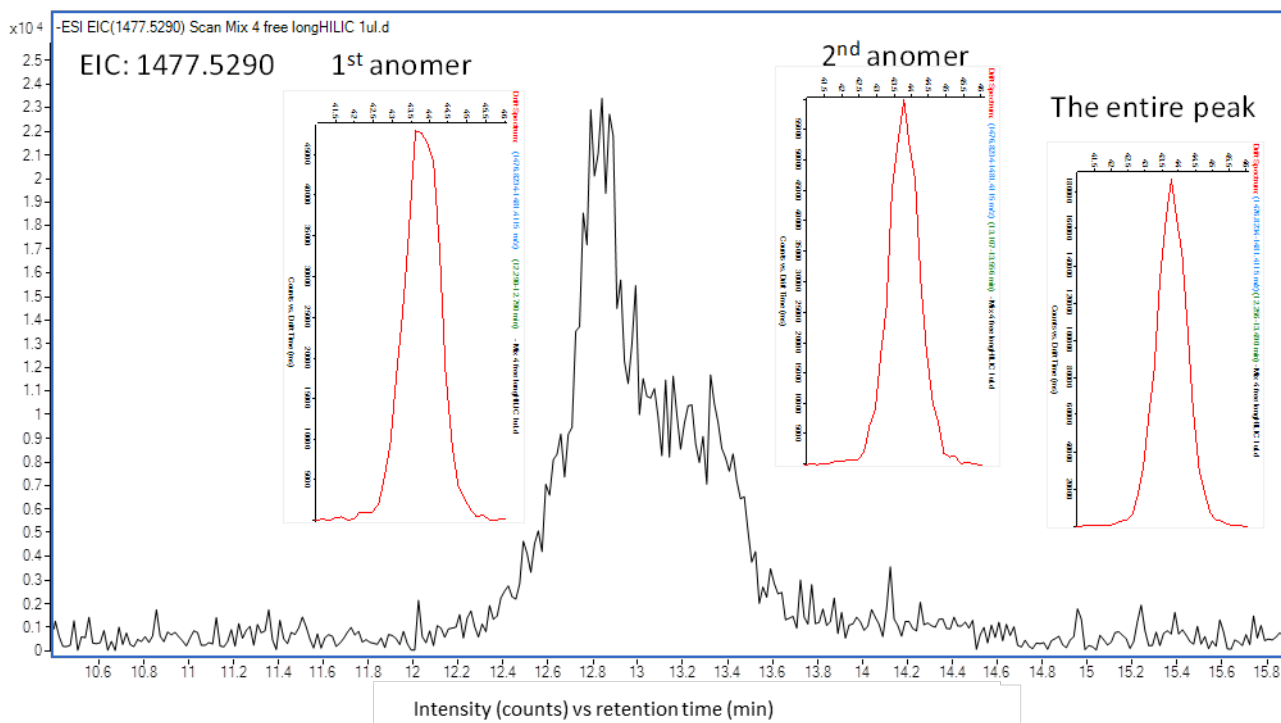

**Fig. S94:** ATDs (in red) from  $[M-H]^-$  ions of unlabeled standard **4** anomers separated by HILIC (in black). A summed ATD of both anomers is shown on the right

# SUPPORTING INFORMATION

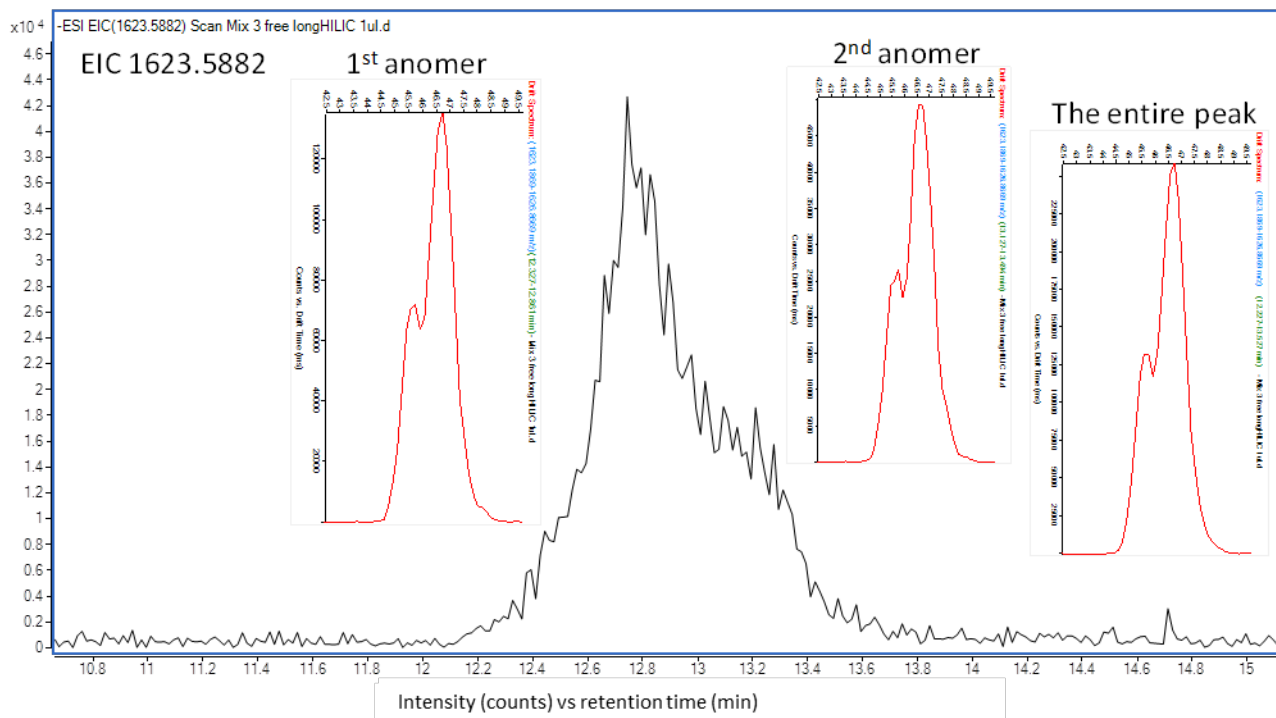

**Fig. S95:** ATDs (in red) from  $[M-H]^-$  ions of unlabeled standard **5** anomers separated by HILIC (in black). A summed ATD of both anomers is shown on the right

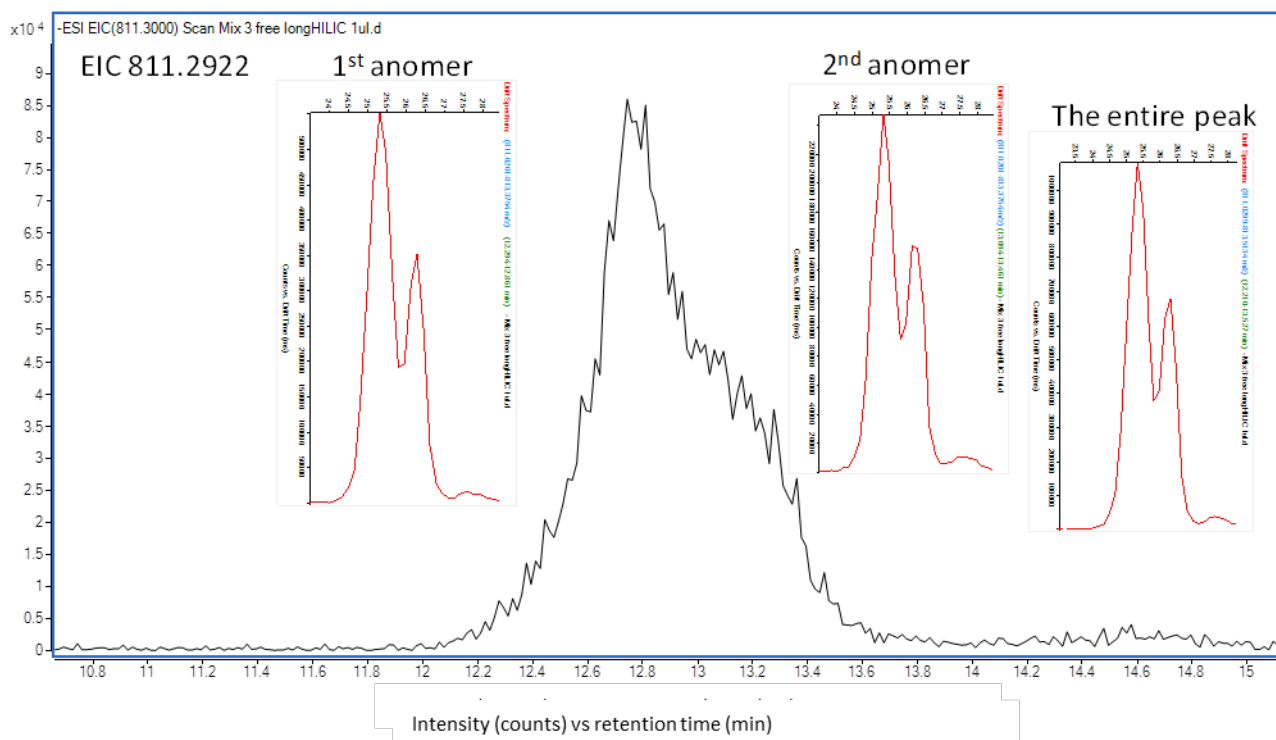

**Fig. S96:** ATDs (in red) from  $[M-2H]^{2-}$  ions of unlabeled standard **5** anomers separated by HILIC (in black). A summed ATD of both anomers is shown on the right

# SUPPORTING INFORMATION

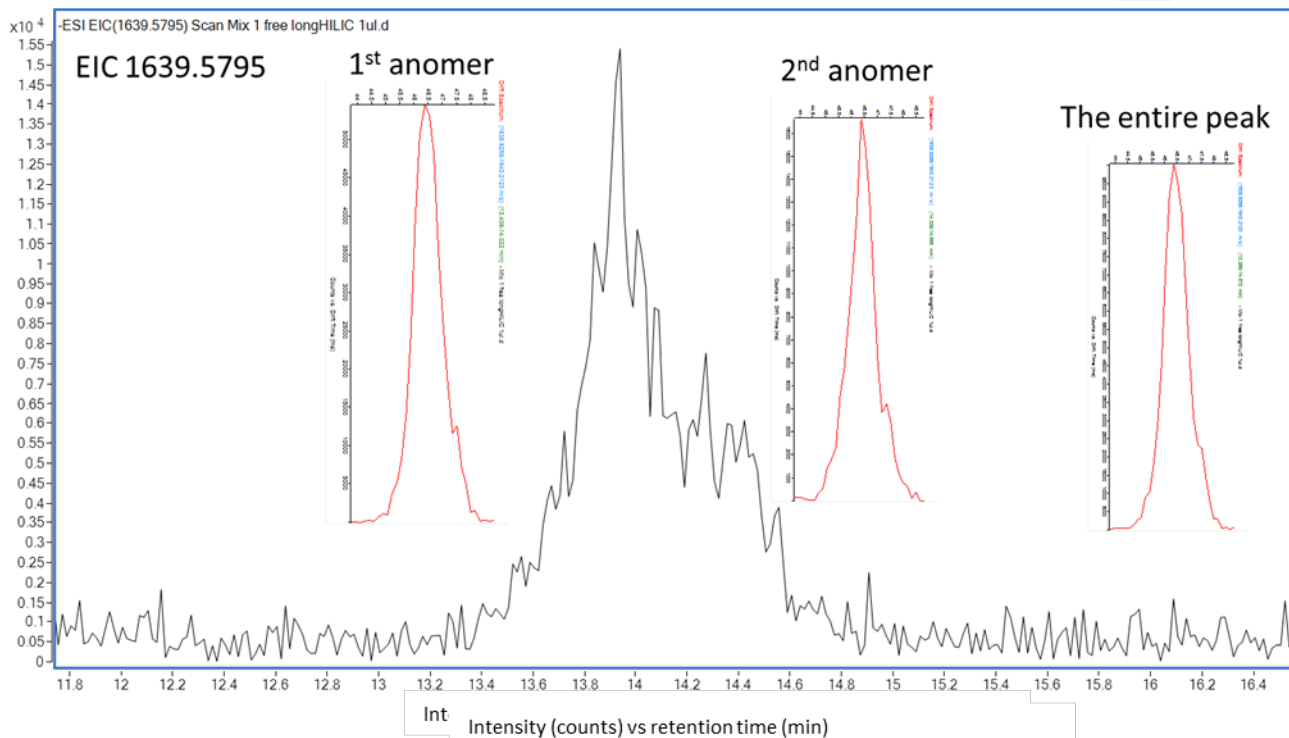

**Fig. S97:** ATDs (in red) from  $[M-H]^-$  ions of unlabeled standard **6** anomers separated by HILIC (in black). A summed ATD of both anomers is shown on the right

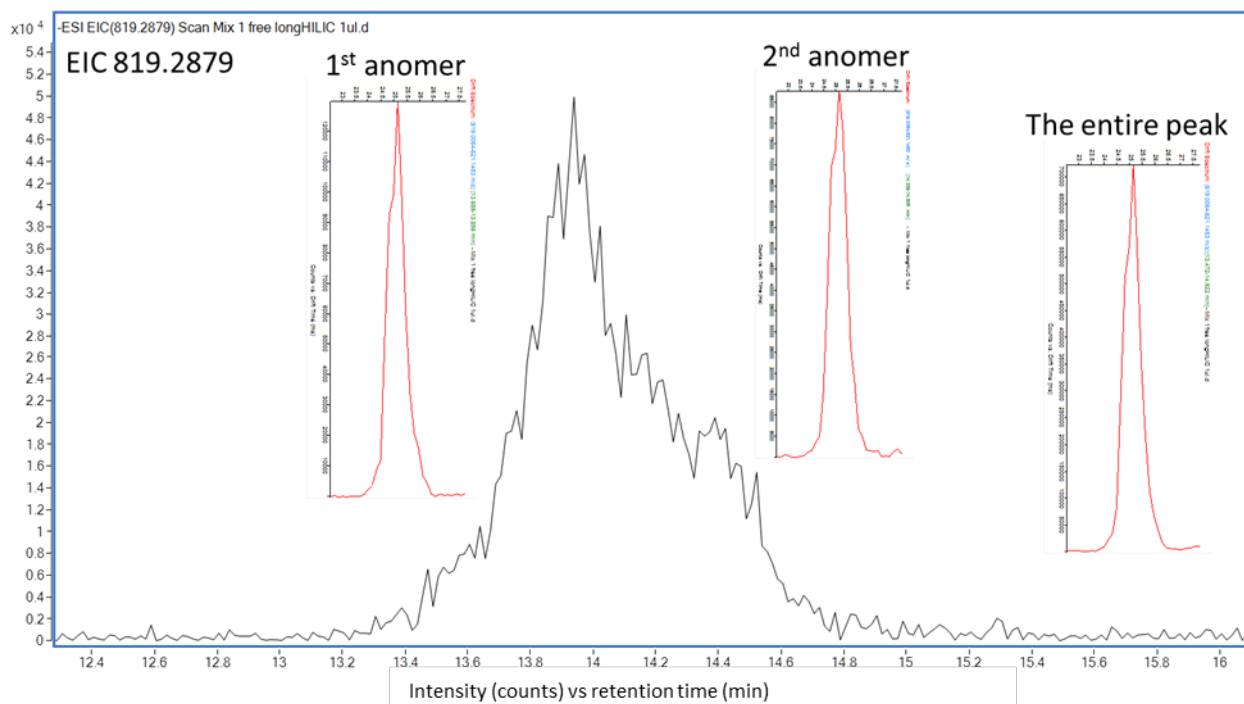

**Fig. S98:** ATDs (in red) from  $[M-2H]^{2-}$  ions of unlabeled standard **6** anomers separated by HILIC (in black). A summed ATD of both anomers is shown on the right



# SUPPORTING INFORMATION

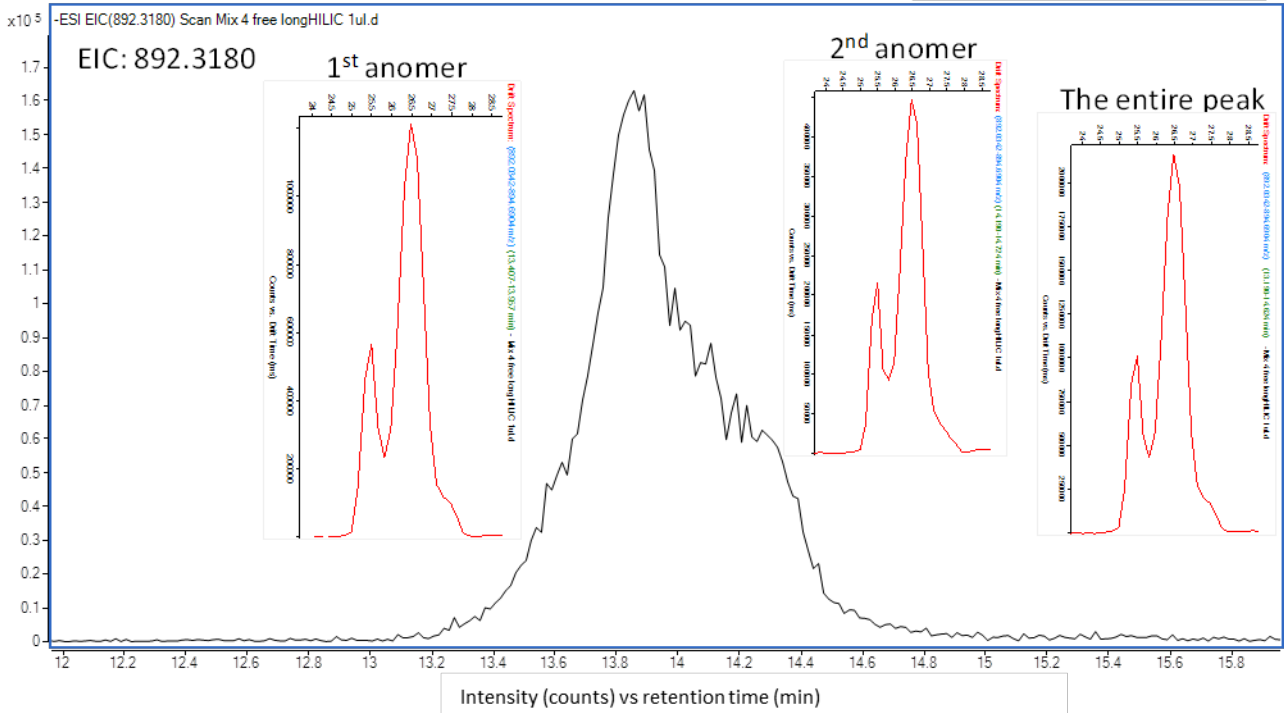

**Fig. S99:** ATDs (in red) from  $[M-2H]^{-2}$  ions of unlabeled standard 7 anomers separated by HILIC (in black). A summed ATD of both anomers is shown on the right

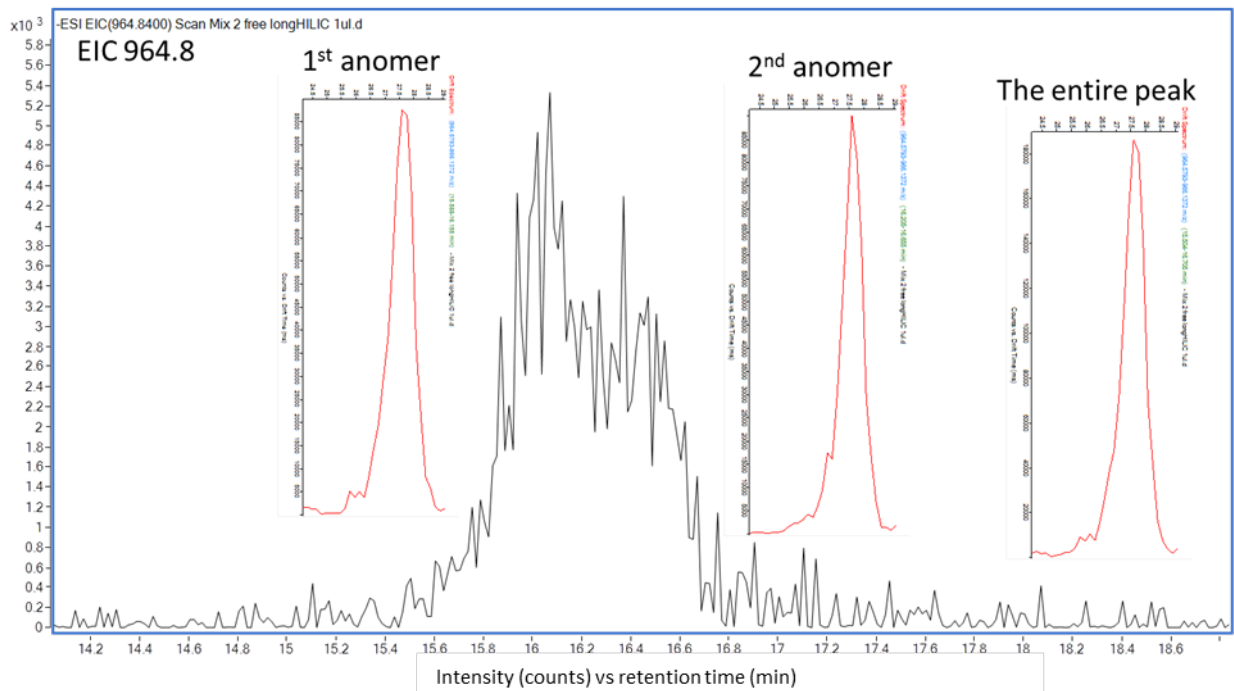

**Fig. S100:** ATDs (in red) from  $[M-2H]^{-2}$  ions of unlabeled standard 8 anomers separated by HILIC (in black). A summed ATD of both anomers is shown on the right

# SUPPORTING INFORMATION

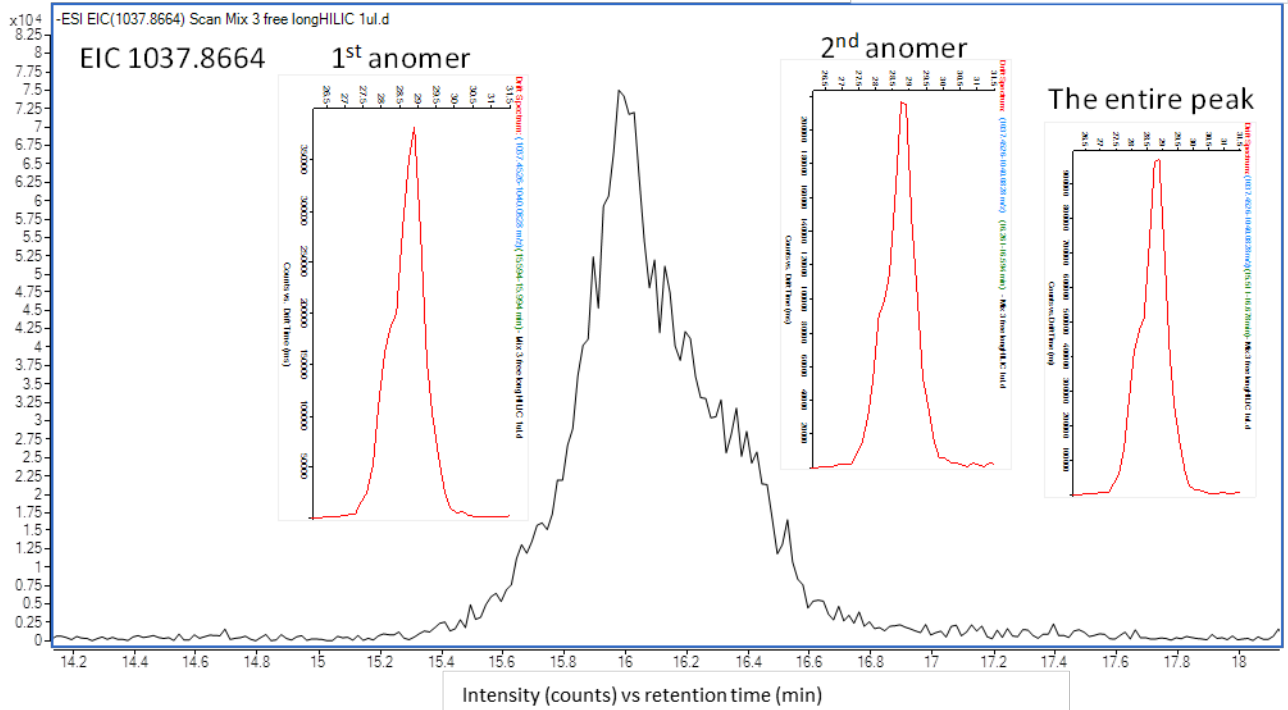

**Fig. S101:** ATDs (in red) from [M-2H]<sup>2-</sup> ions of unlabeled standard **9** anomers separated by HILIC (in black). A summed ATD of both anomers is shown on the right

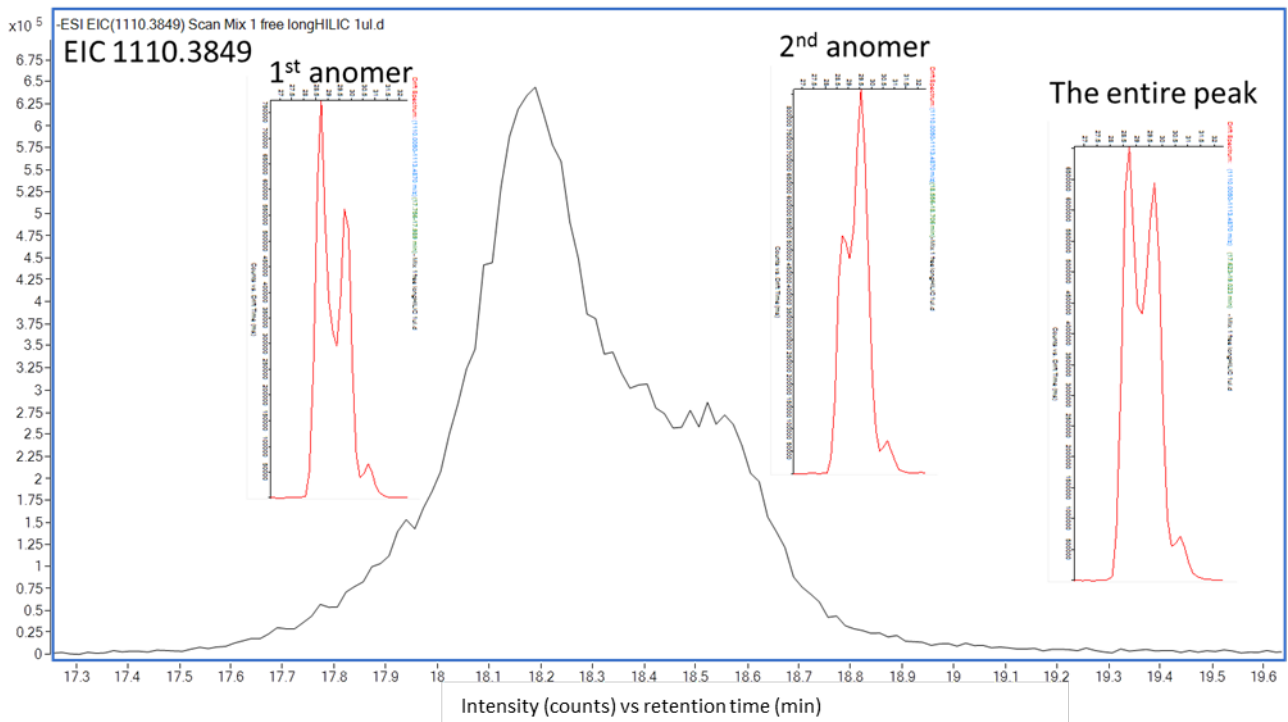

**Fig. S102:** ATDs (in red) from [M-2H]<sup>2-</sup> ions of unlabeled standard **10** anomers separated by HILIC (in black). A summed ATD of both anomers is shown on the right

# SUPPORTING INFORMATION

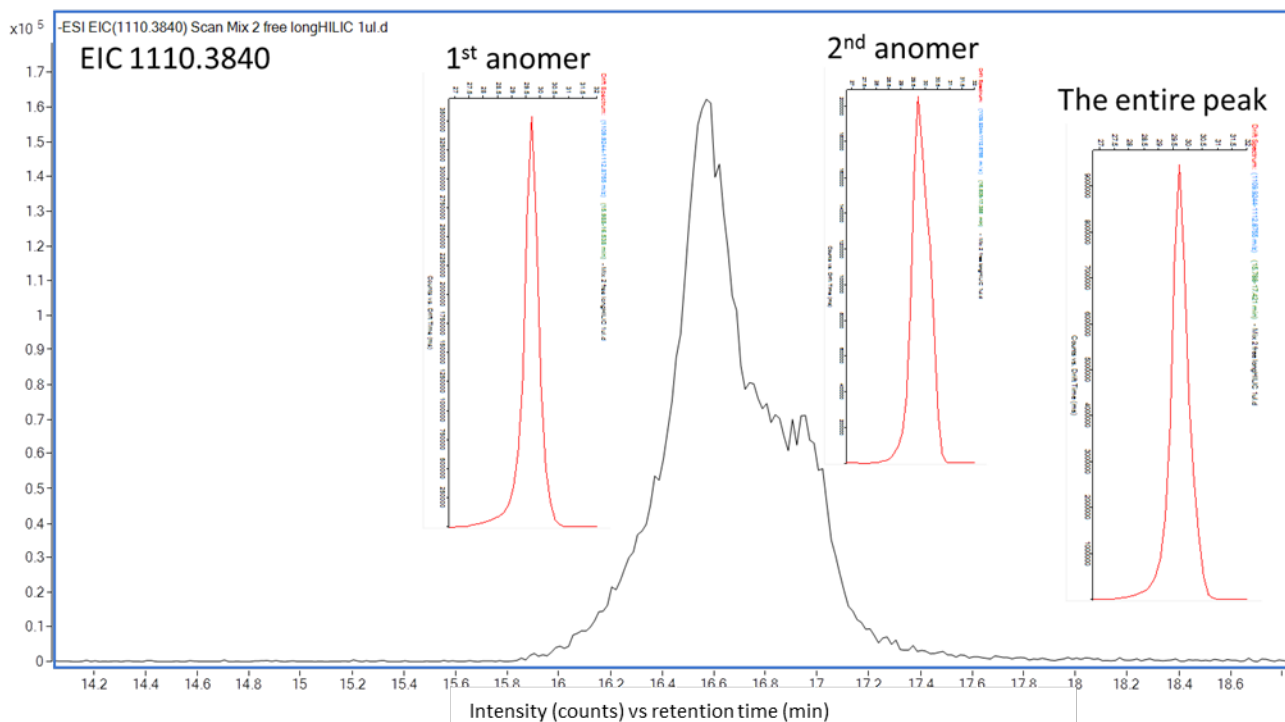

**Fig. S103:** ATDs (in red) from  $[M-2H]_2^-$  ions of unlabeled standard **11** anomers separated by HILIC (in black). A summed ATD of both anomers is shown on the right

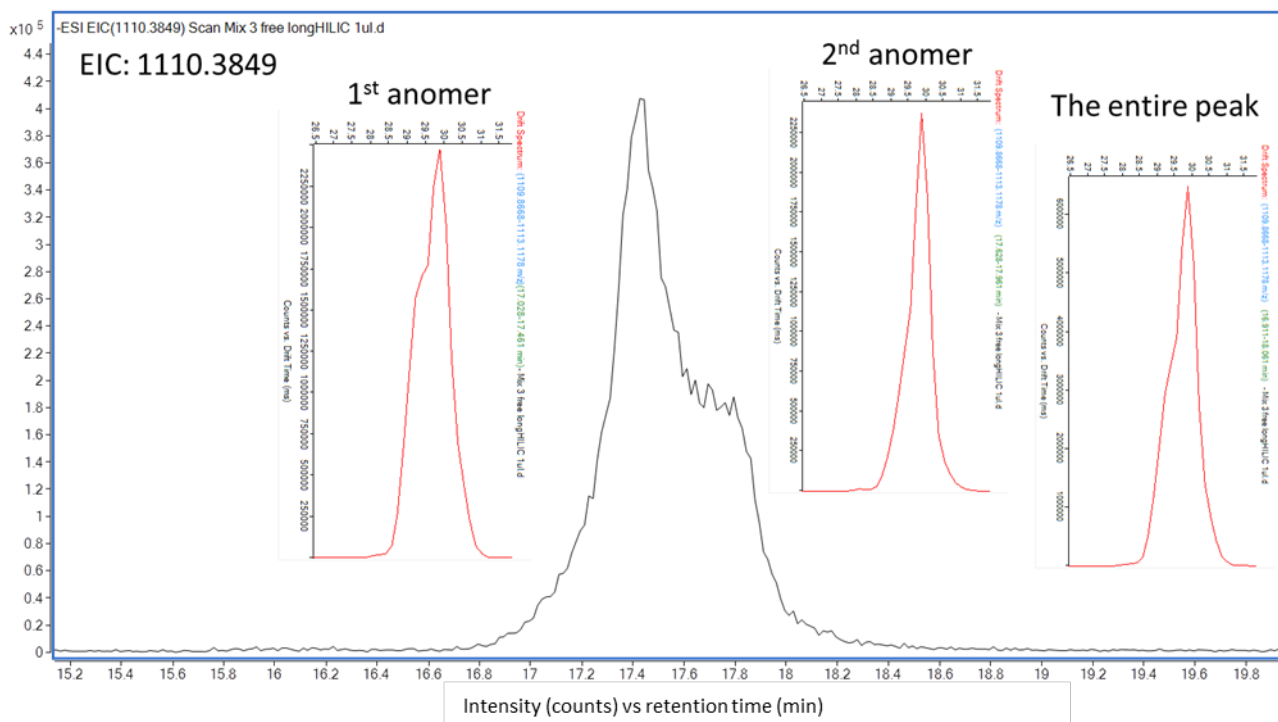

**Fig. S104:** ATDs (in red) from  $[M-2H]_2^-$  ions of unlabeled standard **12** anomers separated by HILIC (in black). A summed ATD of both anomers is shown on the right

# SUPPORTING INFORMATION

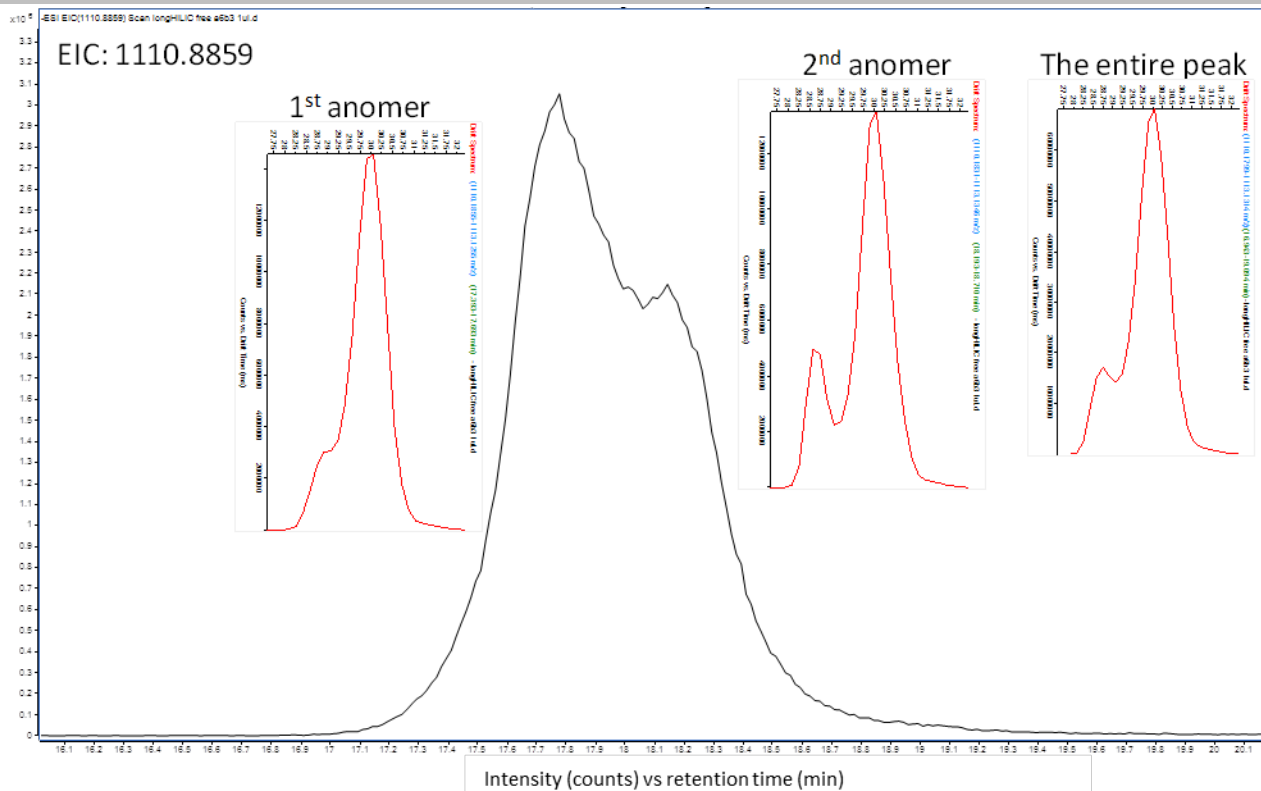

**Fig. S105:** ATDs (in red) from[M-2H]<sup>2-</sup> ions of unlabeled standard **13** anomers separated by HILIC (in black). A summed ATD of both anomers is shown on the right

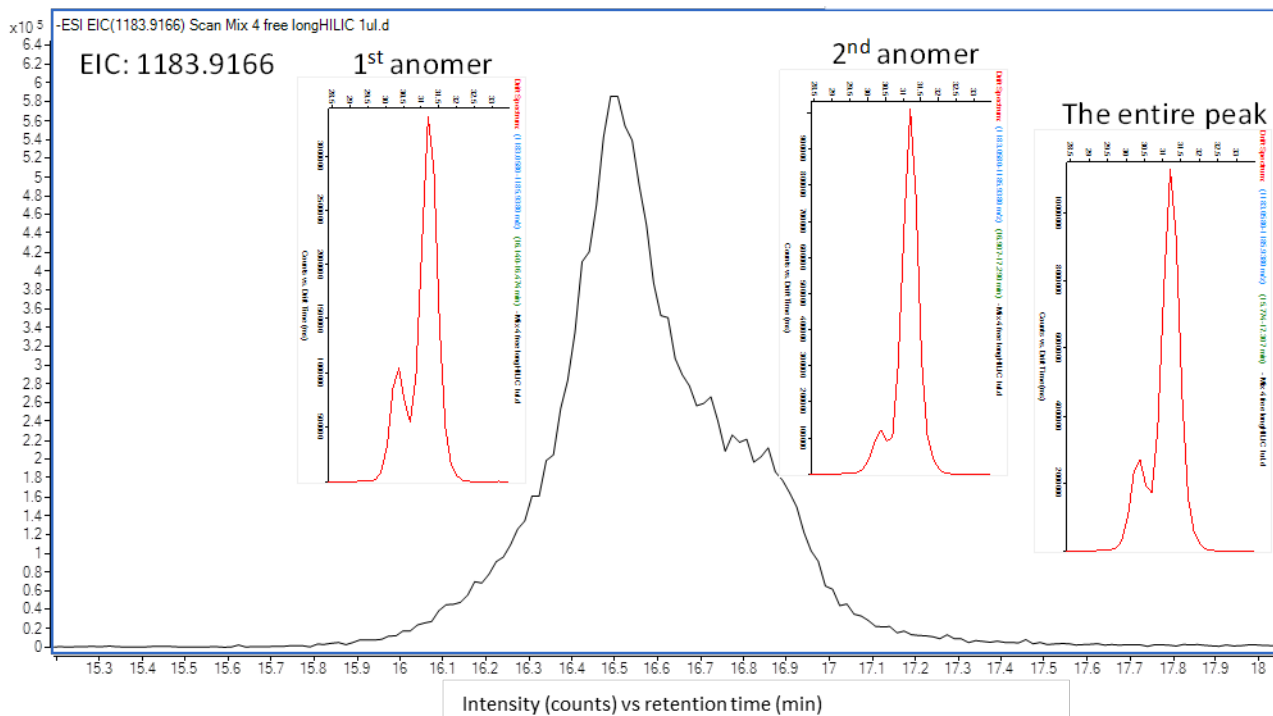

**Fig. S106:** ATDs (in red) from[M-2H]<sup>2-</sup> ions of unlabeled standard **14** anomers separated by HILIC (in black). A summed ATD of both anomers is shown on the right



## SUPPORTING INFORMATION

### 2.6 HILIC-IMS-MS of fetuin released glycans

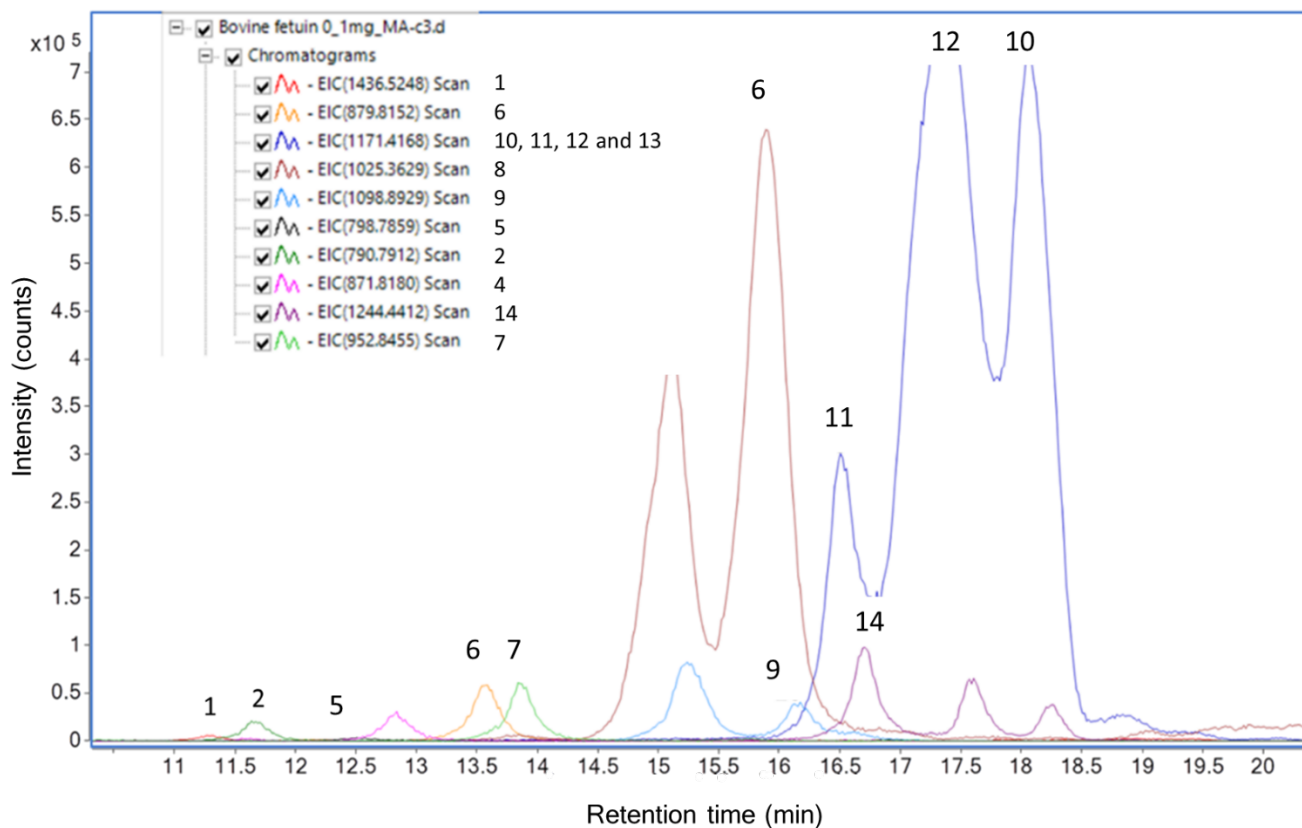

**Fig. S108:** Extracted ion chromatogram of the most abundant ions of fetuin released glycans. Peaks corresponding to identified glycans (by m/z, ATD and CCS values) are indicated by the number of the respective standard.

## SUPPORTING INFORMATION

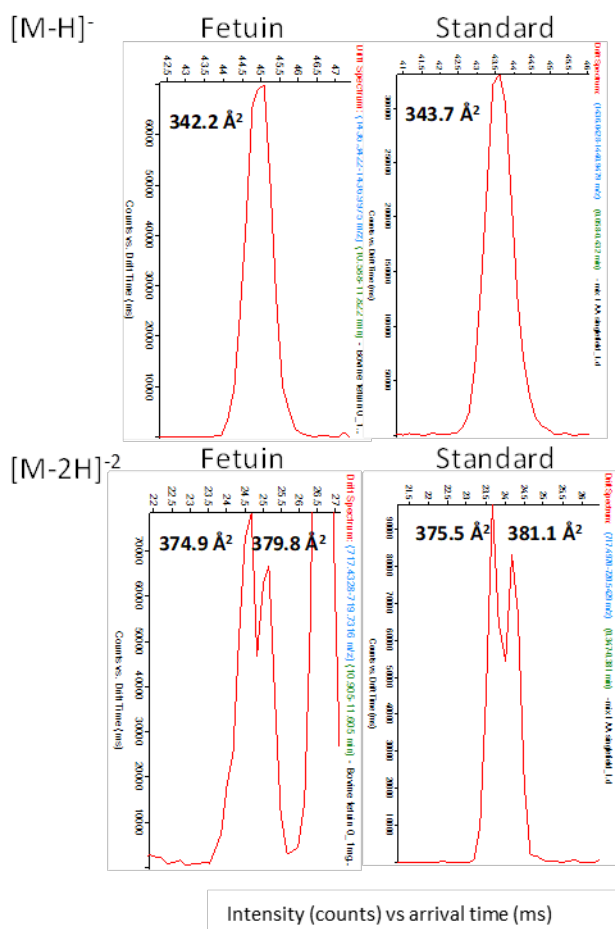

**Fig. S109:** ATDs of  $[M-H]^-$  and  $[M-2H]^{2-}$  ions from standard **1**, compared to the corresponding data from bovine fetuin glycans. For the  $[M-2H]^{2-}$  ions of the standard, averaged CCS values are obtained by stepped field experiments and for  $[M-H]^-$  ions by a single field experiment. The peak without CCS value from the fetuin released glycan sample is a non-related peak with a close  $m/z$  value.

# SUPPORTING INFORMATION

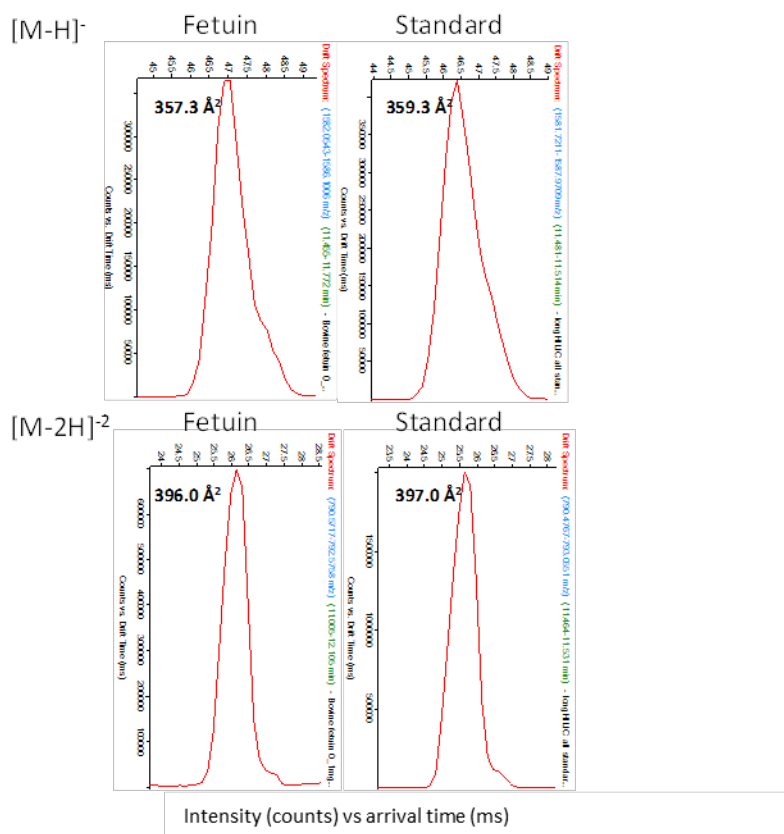

**Fig. S110:** ATDs of  $[M-H]^-$  and  $[M-2H]^{-2}$  ions from standard **2** compared to the corresponding data from bovine fetuin glycans. Averaged CCS values from interday stepped field experiments are used for the standard.



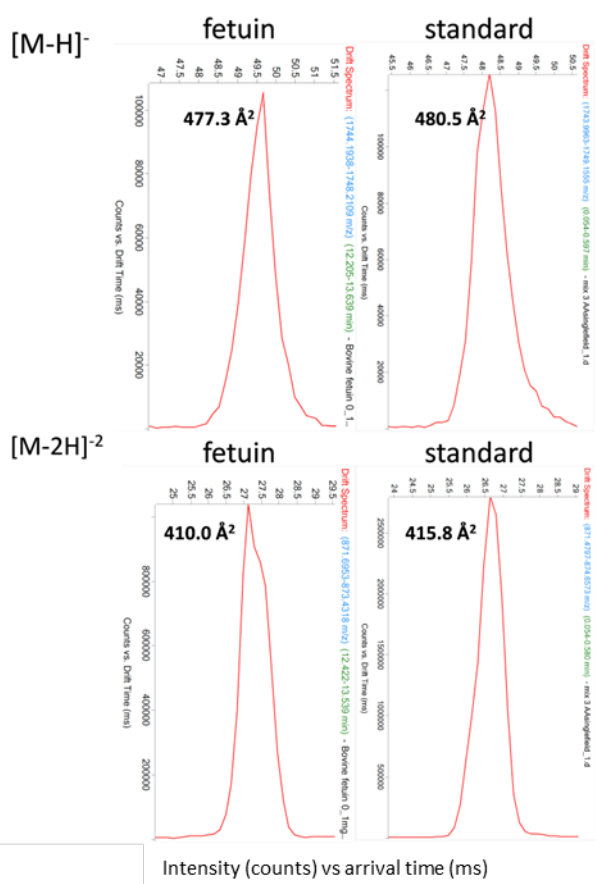

**Fig. S111:** ATDs of  $[M-H]^-$  and  $[M-2H]^{2-}$  ions from standard **4** compared to the corresponding data from bovine fetuin released glycans. Averaged CCS values for standards are obtained from interday stepped field experiments. The CCS deviation of standard and fetuin released glycan is too high and a shoulder in the  $[M-2H]^{2-}$  ion ATD confirms the presence of a different compound.

# SUPPORTING INFORMATION

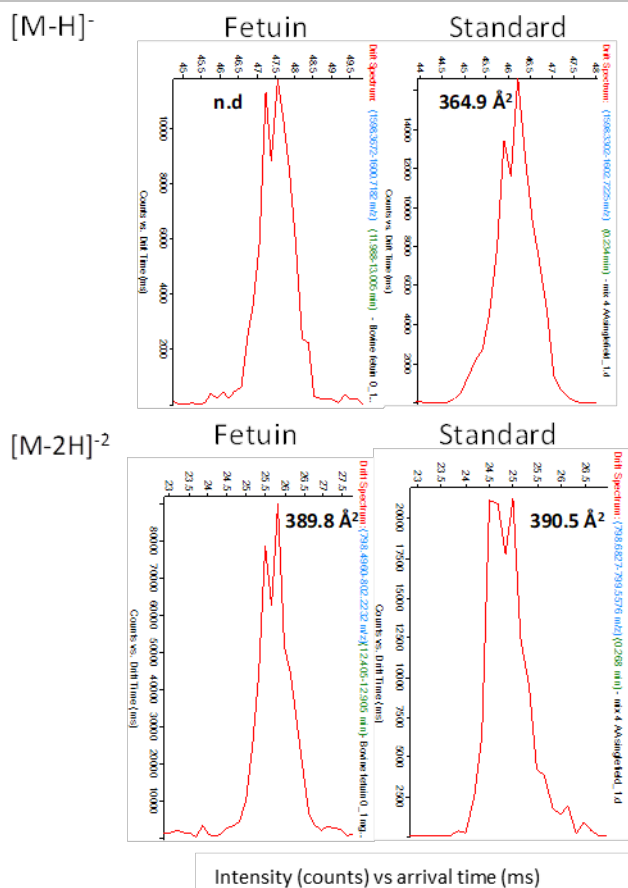

**Fig. S112:** ATDs of  $[M-H]^-$  and  $[M-2H]^{2-}$  ions from standard **5** compared to the corresponding data from bovine fetuin released glycans. For the  $[M-2H]^{2-}$  ions of the standard, averaged CCS values are obtained by stepped field experiments and for  $[M-H]^-$  ions by a single field experiment..

# SUPPORTING INFORMATION

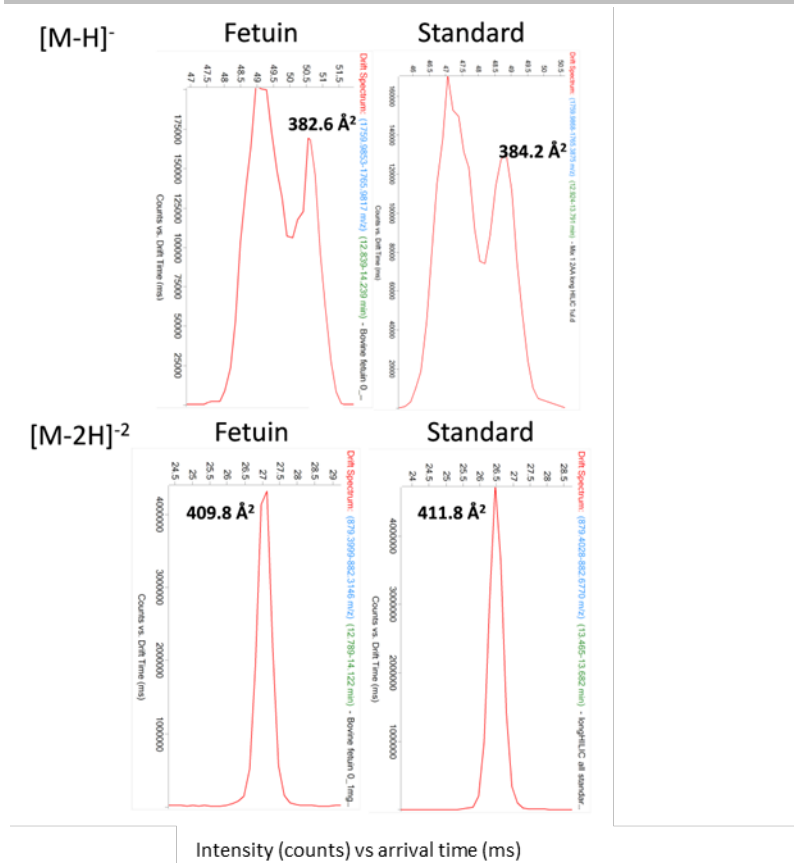

**Fig. S113:** ATDs of [M-H]<sup>-</sup> (highly concentrated) and [M-2H]<sup>-2</sup> ions from standard **6** compared to the corresponding data from bovine fetuin released glycans. For the [M-2H]<sup>-2</sup> ions of the standard, averaged CCS values are obtained by stepped field experiments and for [M-H]<sup>-</sup> ions by a single field experiment.

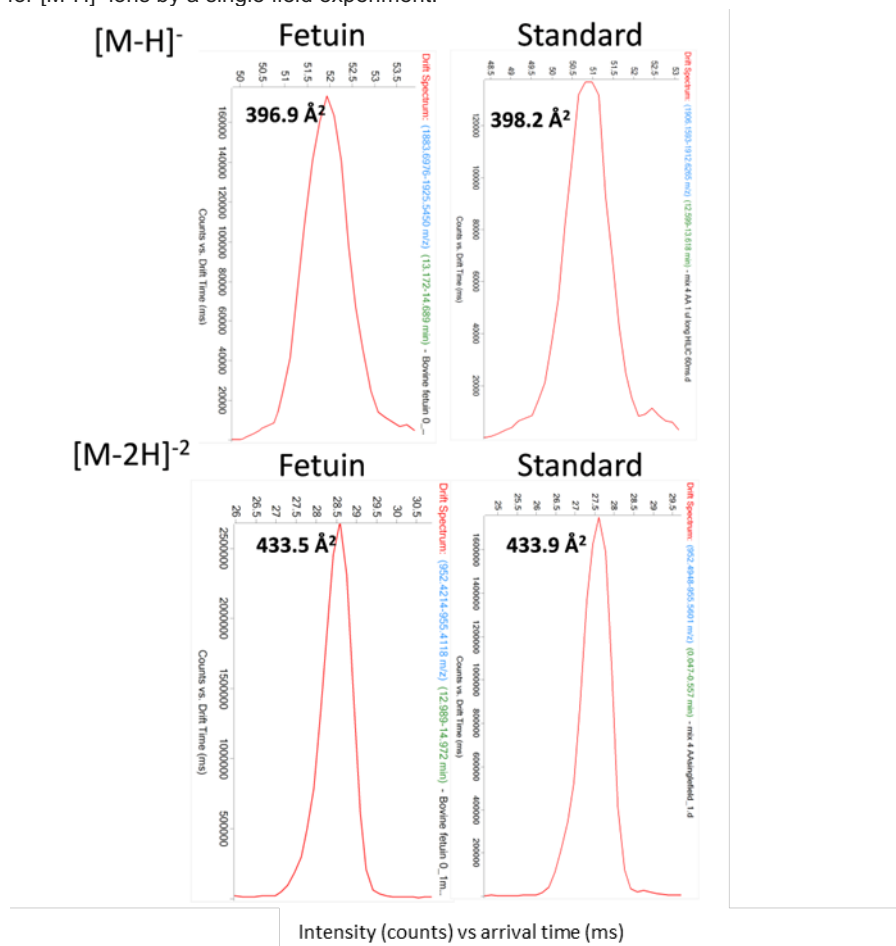

## SUPPORTING INFORMATION

**Fig. S114:** ATDs of  $[M-H]^-$  and  $[M-2H]^{2-}$  ions from standard **7** compared to the corresponding data from bovine fetuin released glycans. For the  $[M-2H]^{2-}$  ions of the standard, averaged CCS values are obtained by stepped field experiments and for  $[M-H]^-$  ions by a single field experiment.

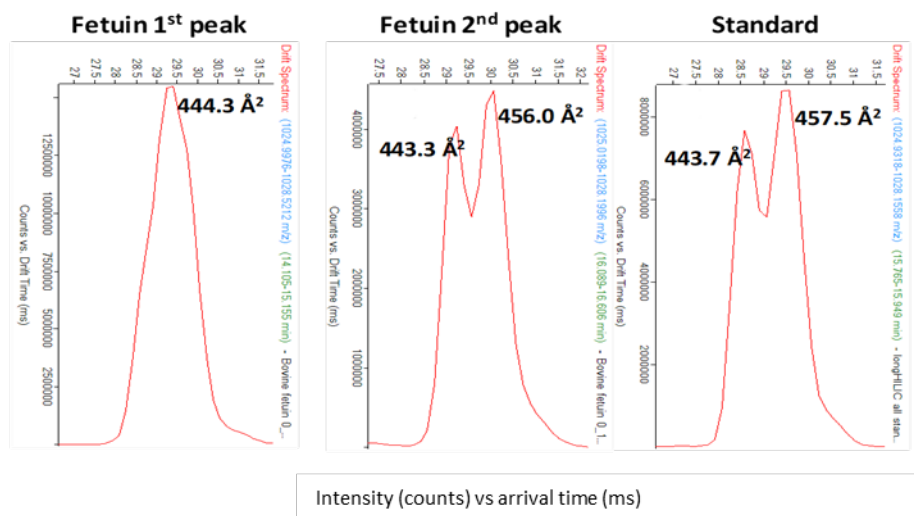

**Fig. S115:** ATDs of  $[M-2H]^{2-}$  ions from standard **8** compared to the corresponding data from bovine fetuin released glycans. Averaged CCS values from interday stepped field experiments are used for the standard.

# SUPPORTING INFORMATION

## STRUCTURAL IDENTIFICATION IN BOVINE FETUI, 2-AA

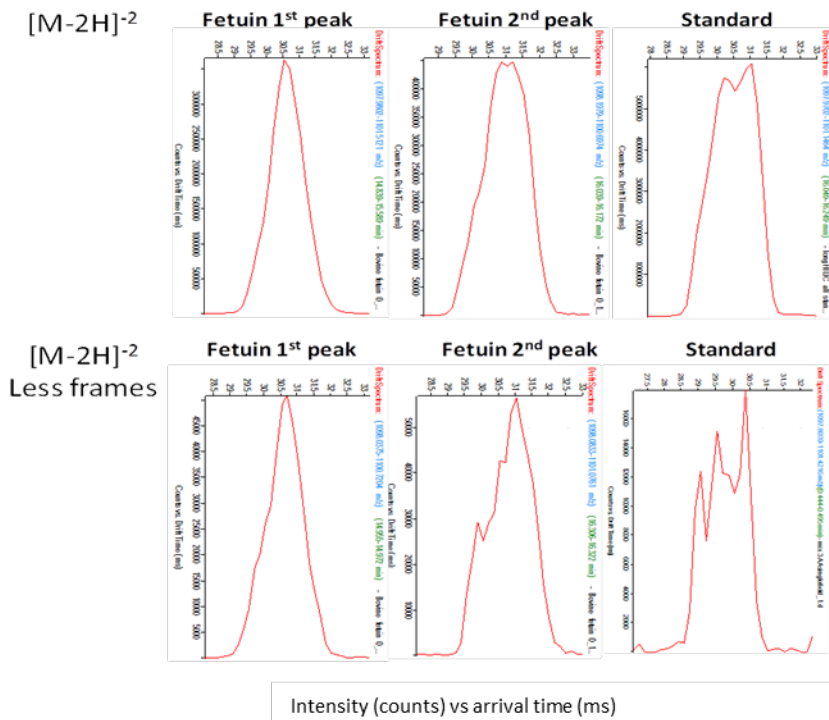

**Fig. S116:** ATDs of  $[M-2H]^{2-}$  ions from standard **9** compared to the corresponding data from bovine fetuin released glycans. Averaged CCS values from interday stepped field experiments are used for the standards.

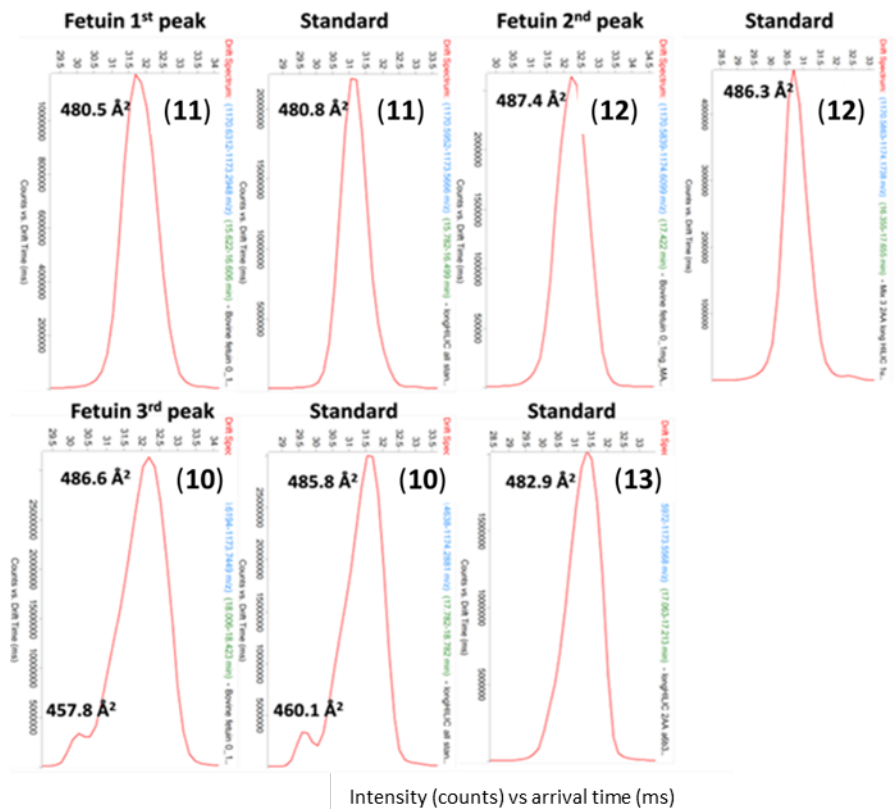

**Fig. S117:** ATDs of  $[M-2H]^{2-}$  ions from regioisomer standards **10**, **11**, **12** and **13**, compared to the corresponding data from bovine fetuin released glycans, separated by HILIC. Averaged CCS values from interday stepped field experiments are used for the standards.

## SUPPORTING INFORMATION

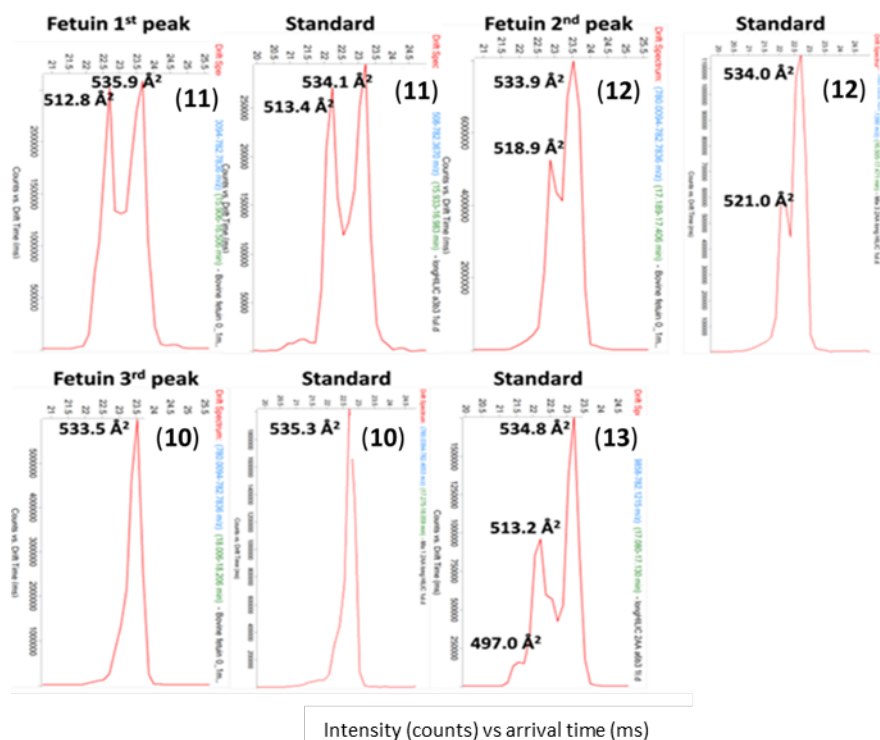

**Fig. S118:** ATDs of  $[M-2H]^{3-}$  ions from regioisomer standards **10**, **11**, **12** and **13**, compared to the corresponding data from bovine fetuin released glycans, separated by HILIC. Averaged CCS values from interday stepped field experiments are used for the standards.

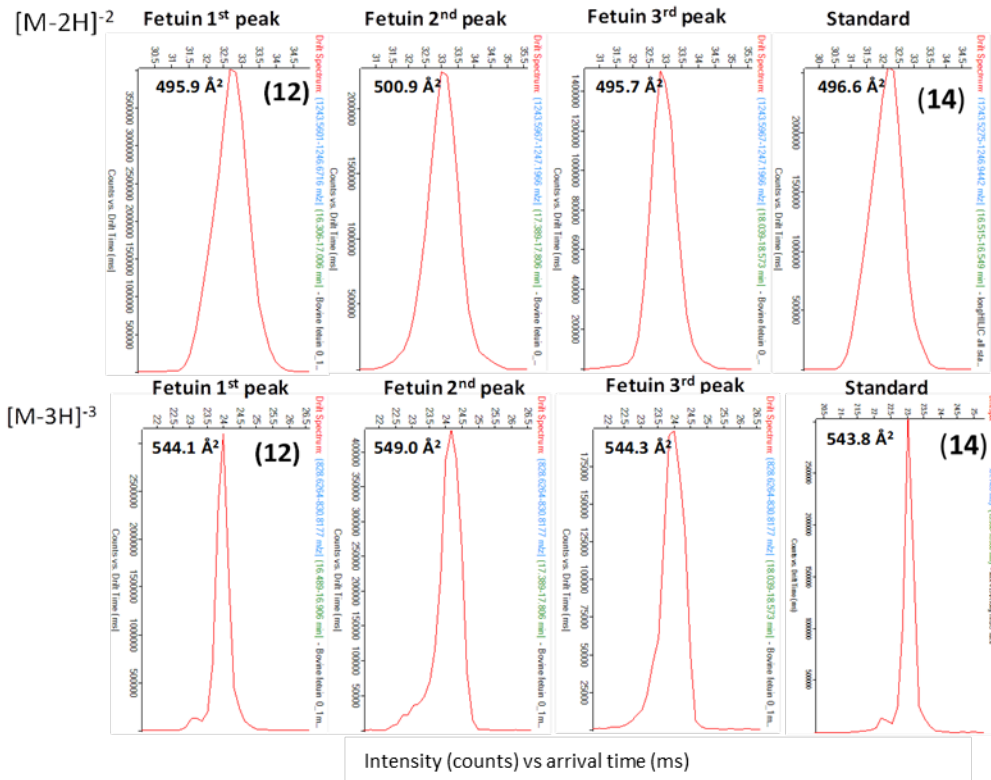

**Fig. S119:** ATDs of  $[M-2H]^{2-}$  and  $[M-3H]^{3-}$  ions from standard **14** compared to the corresponding data from bovine fetuin released glycans. For the standards, averaged CCS values from interday stepped field experiments are used for the  $[M-2H]^{2-}$  ions and from a single field experiment for the  $[M-3H]^{3-}$  ions.

## SUPPORTING INFORMATION

**Table S1:** HILIC-IMS-QTOF data from bovine fetuin released and 2AA labelled glycan. H = hexose; N = N-acetylhexosamine; F = fucose, S = N-acetylneuraminic acid, G = N-Glycolylneuraminic acid. Linkages are specified in glycans where the structure was elucidated with standards (numbers in bold).

| N° | RT (min) | CCS (Å <sup>2</sup> ) | z | m/z       | Composition | Error (ppm) | Rel. abund. % | Suggested structure |
|----|----------|-----------------------|---|-----------|-------------|-------------|---------------|---------------------|
| 1  | 9.53     | 302.4                 | 1 | 1176.4280 | H3N2F1      | 2.7         | 0.007         |                     |
| 2  | 10.77    | 307.2                 |   | 1192.4243 | H4N2        | 1.5         | 0.037         |                     |
| 3  | 10.54    | 309.4                 | 1 | 1192.4244 |             | 1.4         | 0.014         |                     |
| 4  | 9.63     | 320.0                 |   | 1233.4499 | H3N3        | 2.3         | 0.013         |                     |
| 5  | 10.13    | 309.7                 | 1 | 1233.4505 |             | 1.8         | 0.025         |                     |
| 6  | 12.51    | 369.9                 | 2 | 676.7346  | H5N2        | 1.8         | 0.363         |                     |
|    |          | 331.8                 | 1 | 1354.4779 |             | 0.8         | 0.820         |                     |
|    |          | 332.2                 |   | 1379.5061 | H3N3F1      | 3.2         | 0.004         |                     |
| 7  | 10.56    | 325.2                 | 1 | 1379.5065 |             | 2.9         | 0.004         |                     |
|    |          | 360.4                 | 2 | 697.2478  | H4N3        | 1.8         | 0.008         |                     |
| 8  | 11.52    | 333.0                 | 1 | 1395.5038 |             | 1.2         | 0.065         |                     |
|    |          | 342.2                 | 1 | 1436.5284 | H3N4        | 2.5         | 0.014         |                     |
| 9  | 11.27    | 374.9                 | 2 | 717.7642  |             | 2.5         | 0.009         |                     |
|    |          | 379.8                 | 2 | 717.7639  |             | 2.3         | 0.008         |                     |
|    |          | 352.2                 | 1 | 1516.5291 | H6N2        | 1.7         | 0.096         |                     |
| 10 | 14.02    | 389.1                 | 2 | 757.7611  |             | 1.5         | 0.089         |                     |
|    |          | 344.8                 | 1 | 1541.5603 | H4N3F1      | 2.0         | 0.011         |                     |
| 11 | 11.89    | 382.8                 | 2 | 770.2771  |             | 1.2         | 0.004         |                     |
|    |          | 354.7                 | 1 | 1557.5560 | H5N3        | 1.5         | 0.049         |                     |
| 12 | 12.99    | 396.9                 | 2 | 778.2746  |             | 1.2         | 0.001         |                     |
|    |          | 381.2                 | 2 | 778.2748  |             | 0.9         | 0.033         |                     |
|    |          | 357.3                 | 1 | 1582.5886 | H3N4F1      | 0.8         | 0.060         |                     |
| 13 | 11.67    | 396                   | 2 | 790.7909  |             | 0.6         | 0.060         |                     |
| 14 | 12.51    | 389.8                 | 2 | 798.7865  | H4N4        | 2.8         | 0.008         |                     |
| 15 | 15.56    | 375.3                 | 1 | 1678.5785 | H7N2        | 3.7         | 0.003         |                     |
|    |          | 409.2                 | 2 | 838.7876  |             | 1.3         | 0.047         |                     |
| 16 | 13.12    | 400.4                 | 2 | 842.7954  | H4N3S1      | 1.6         | 0.234         |                     |
|    |          | 424.3                 | 2 | 842.7946  |             | 2.6         | 0.007         |                     |
| 17 | 14.14    | 372.7                 | 1 | 1686.5961 | H4N3S1      | 2.8         | 0.006         |                     |
|    |          | 403.8                 | 2 | 842.7953  |             | 1.8         | 0.589         |                     |
| 18 | 14.14    | 400.4                 | 2 | 850.7920  | H4N3G1      | 2.7         | 0.004         |                     |
| 19 | 14.95    | 406.2                 | 2 | 850.7929  |             | 1.6         | 0.017         |                     |
|    |          | 370                   | 1 | 1703.6113 | H5N3F1      | 2.9         | 0.003         |                     |
| 20 | 13.30    | 403.3                 | 2 | 851.3024  |             | 2.4         | 0.010         |                     |
|    |          | 372.2                 | 1 | 1719.6085 | H6N3        | 1.5         | 0.032         |                     |
| 21 | 14.42    | 405.6                 | 2 | 859.3007  |             | 1.4         | 0.113         |                     |
|    |          | 377.3                 | 1 | 1744.6386 | H4N4F1      | 2.4         | 0.010         |                     |
|    |          | 410                   | 2 | 871.8166  |             | 1.3         | 0.096         |                     |
|    |          | 371                   | 1 | 1760.6332 | H5N4        | 2.6         | 0.028         |                     |
| 23 | 13.59    | 382.6                 | 1 | 1760.6332 |             | 2.6         | 0.012         |                     |
|    |          | 409.8                 | 2 | 879.8138  |             | 1.6         | 0.201         |                     |



# SUPPORTING INFORMATION

| N° | RT (min) | CCS (Å <sup>2</sup> ) | z | m/z       | Composition | Error (ppm) | Rel. abund. % | Suggested structure |
|----|----------|-----------------------|---|-----------|-------------|-------------|---------------|---------------------|
| 24 | 14.51    | 418.5                 | 2 | 915.8240  | H4N3F1S1    | 1.9         | 0.008         |                     |
| 25 | 13.47    | 420.6                 |   | 915.8242  |             | 1.7         | 0.030         |                     |
| 26 | 16.40    | 422                   | 2 | 919.8128  | H8N2        | 2.4         | 0.004         |                     |
| 27 | 16.71    | 426.8                 |   | 919.8130  |             | 2.3         | 0.011         |                     |
| 28 | 14.46    | 440.2                 | 2 | 923.8192  | H5N3S1      | 4.3         | 0.001         |                     |
| 29 | 15.49    | 418.5                 |   | 923.8226  |             | 0.6         | 0.278         |                     |
| 30 | 15.52    | 428.3                 |   | 940.3274  |             | 1.0         | 0.014         |                     |
| 31 | 14.12    | 439.5                 | 2 | 944.3346  | H4N4S1      | 2.0         | 0.015         |                     |
| 32 | 14.99    | 421.5                 |   | 944.3352  |             | 1.4         | 0.042         |                     |
| 33 | 13.71    | 437.2                 |   | 944.3354  |             | 1.2         | 0.143         |                     |
| 33 | 13.71    | 437.9                 |   | 944.3367  |             | -0.2        | 0.010         |                     |
| 34 | 13.84    | 396.9                 | 1 | 1906.6916 | H5N4F1      | 2.1         | 0.021         |                     |
|    |          | 433.5                 | 2 | 952.8427  |             | 1.5         | 0.193         |                     |
| 35 | 14.69    | 437.2                 | 2 | 960.8396  | H6N4        | 2.1         | 0.009         |                     |
|    |          | 426                   |   | 960.8410  |             | 0.6         | 0.018         |                     |
| 36 | 15.79    | 437.4                 | 2 | 988.3427  | H4N3S2      | 1.9         | 0.008         |                     |
| 37 | 15.72    | 435.2                 | 2 | 996.8498  | H5N3F1S1    | 2.4         | 0.002         |                     |
| 38 | 14.76    | 443.9                 |   | 996.8504  |             | 1.8         | 0.016         |                     |
| 38 | 14.76    | 432.7                 |   | 996.8517  |             | 0.5         | 0.005         |                     |
| 39 | 17.69    | 435.1                 | 2 | 1000.8397 | H9N2        | 1.7         | 0.006         |                     |
| 40 | 15.69    | 443.9                 | 2 | 1004.8484 | H6N3S1      | 1.2         | 0.191         |                     |
| 41 | 16.69    | 440.3                 |   | 1004.8487 |             | 0.9         | 0.318         |                     |
| 42 | 15.24    | 446.1                 | 2 | 1017.3632 | H4N4F1S1    | 2.2         | 0.003         |                     |
| 43 | 15.89    | 443.3                 | 2 | 1025.3617 | H5N4S1      | 1.1         | 1.371         |                     |
|    |          | 456.0                 |   | 1025.3624 |             | 0.5         | 2.603         |                     |
| 44 | 15.11    | 444.3                 | 2 | 1025.3621 | H5N4S1      | 0.8         | 2.243         |                     |
| 45 | 16.01    | 439.6                 | 2 | 1033.3580 | H5N4G1      | 2.3         | 0.013         |                     |
| 46 | 16.62    | 453.8                 |   | 1033.3580 |             | 2.2         | 0.013         |                     |
| 46 | 16.62    | 447.9                 |   | 1033.3596 |             | 0.7         | 0.126         |                     |
| 47 | 14.96    | 455.3                 | 2 | 1033.8693 | H6N4F1      | 1.2         | 0.102         |                     |
| 48 | 15.74    | 448.7                 | 2 | 1041.8634 | H7N4        | 4.4         | 0.015         |                     |
| 49 | 14.64    | 455.6                 | 2 | 1054.3803 | H5N5F1      | 3.3         | 0.014         |                     |

# SUPPORTING INFORMATION

| N° | RT (min) | CCS (Å²) | z | m/z       | Composition | Error (ppm) | Rel. abund. % | Suggested structure |
|----|----------|----------|---|-----------|-------------|-------------|---------------|---------------------|
| 50 | 15.29    | 449.4    | 2 | 1062.3791 | H6N5        | 2.0         | 0.023         |                     |
|    |          | 436.8    | 2 | 1062.3798 |             | 1.4         | 0.018         |                     |
| 51 | 18.30    | 451      | 2 | 1069.3682 |             | 2.5         | 0.011         |                     |
| 52 | 17.59    | 450.6    | 2 | 1069.3687 | H5N3S2      | 2.1         | 0.021         |                     |
| 53 | 16.89    | 453.1    | 2 | 1069.3690 |             | 1.8         | 0.017         |                     |
| 54 | 15.91    | 461      | 2 | 1077.8752 | H6N3F1S1    | 3.2         | 0.007         |                     |
| 55 | 16.16    | 470.3    | 2 | 1098.3908 | H5N4F1S1    | 0.9         | 0.173         |                     |
| 56 | 15.26    | 464.3    | 2 | 1098.3913 |             | 0.5         | 0.368         |                     |
| 57 | 16.10    | 462.9    | 2 | 1106.3878 | H6N4S1      | 1.4         | 0.087         |                     |
| 58 | 16.86    | 468.5    |   | 0.8       |             | 1106.3884   | 0.078         |                     |
| 59 | 15.99    | 449.4    | 2 | 1114.8951 | H7N4F1      | 1.7         | 0.046         |                     |
|    |          | 475.1    |   | 1114.8956 |             | 1.2         | 0.022         |                     |
| 60 | 14.96    | 473.4    | 2 | 1118.9043 | H4N5F1S1    | 0.8         | 0.009         |                     |
| 61 | 15.81    | 464.2    | 2 | 1126.8998 | H5N5S1      | 2.5         | 0.023         |                     |
| 62 | 16.48    | 466.7    |   | 1.0       |             | 1126.9014   | 0.023         |                     |
| 63 | 18.04    | 457.8    | 2 | 1170.9085 | H5N4S2      | 1.8         | 0.158         |                     |
|    |          | 486.6    |   | 1170.9090 |             | 1.4         | 4.758         |                     |
|    |          | 533.5    |   | 780.2703  |             | 1.3         | 0.374         |                     |
| 64 | 17.34    | 487.4    | 2 | 1170.9093 | H5N4S2      | 1.1         | 9.347         |                     |
|    |          | 533.9    |   | 780.2705  |             | 1.0         | 1.109         |                     |
|    |          | 518.9    |   | 780.2705  |             | 1.0         | 0.346         |                     |
| 65 | 16.51    | 480.5    | 3 | 1170.9097 | H5N4S2      | 0.8         | 1.283         |                     |
|    |          | 535.9    |   | 780.2707  |             | 0.8         | 0.185         |                     |
|    |          | 512.8    |   | 780.2708  |             | 0.6         | 0.172         |                     |
| 66 | 18.76    | 485.1    | 2 | 1178.9062 | H5N4S1G1    | 1.6         | 0.373         |                     |
|    |          | 530.8    |   | 785.6021  |             | 1.0         | 0.028         |                     |
| 67 | 18.16    | 490.1    | 2 | 1178.9064 | H5N4S1G1    | 1.4         | 0.407         |                     |
|    |          | 530.8    |   | 785.6021  |             | 1.1         | 0.037         |                     |
| 68 | 16.17    | 483.3    | 2 | 1179.4171 | H6N4F1S1    | 1.0         | 0.288         |                     |
| 69 | 18.85    | 485.4    | 2 | 1186.9012 | H5N4G2      | 3.6         | 0.007         |                     |
| 70 | 19.38    | 483.4    |   | 1186.9024 |             | 2.6         | 0.009         |                     |
| 71 | 17.01    | 483.2    | 2 | 1187.4137 | H6N4F1G1    | 1.7         | 0.034         |                     |
| 72 | 17.72    | 487.8    |   | 1187.4139 |             | 1.6         | 0.030         |                     |
| 73 | 17.24    | 487.8    | 2 | 1207.9277 | H6N5S1      | 1.1         | 0.497         |                     |
| 74 | 16.59    | 477.8    | 2 | 1207.9278 |             | 1.0         | 1.098         |                     |
| 75 | 16.72    | 495.9    | 2 | 828.9551  | H5N4F1S2    | 0.8         | 0.349         |                     |
|    |          | 544.1    |   | 3         |             | 828.9559    | 1.2           |                     |
| 76 | 17.57    | 500.9    | 2 | 1243.9375 | H5N4F1S2    | 0.7         | 0.209         |                     |
|    |          | 549.0    |   | 3         |             | 828.9563    | 1.7           |                     |
| 77 | 18.26    | 495.9    | 2 | 1243.9386 | H5N4F1S2    | 1.6         | 0.112         |                     |
|    |          | 544.3    |   | 3         |             | 1243.9387   | 2.6           |                     |

## SUPPORTING INFORMATION

| N° | RT (min) | CCS (Å <sup>2</sup> ) | z | m/z       | Composition | Error (ppm) | Rel. abund. %                                                                         | Suggested structure                                                                   |       |                                                                                     |
|----|----------|-----------------------|---|-----------|-------------|-------------|---------------------------------------------------------------------------------------|---------------------------------------------------------------------------------------|-------|-------------------------------------------------------------------------------------|
| 78 | 17.52    | 492.8                 | 2 | 1251.934  | H5N4F1S1G1  | 2.4         | 0.030                                                                                 | 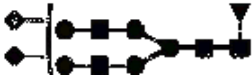   |       |                                                                                     |
|    |          | 544.4                 | 3 | 834.2872  |             | 2.1         | 0.004                                                                                 |                                                                                       |       |                                                                                     |
| 79 | 18.39    | 504.4                 | 2 | 1251.9346 |             | 1.9         | 0.077                                                                                 |                                                                                       |       |                                                                                     |
|    |          | 540.4                 | 3 | 834.2867  |             | 2.7         | 0.010                                                                                 |                                                                                       |       |                                                                                     |
| 80 | 18.79    | 495                   | 2 | 1251.9343 |             | 2.2         | 0.034                                                                                 |                                                                                       |       |                                                                                     |
|    |          | 537.6                 | 3 | 834.288   |             | 1.1         | 0.002                                                                                 |                                                                                       |       |                                                                                     |
| 81 | 18.31    | 487.9                 | 2 | 1259.9302 |             | 3.3         | 0.009                                                                                 |                                                                                       |       |                                                                                     |
|    |          | 544.1                 | 3 | 839.6184  |             | 2.5         | 0.002                                                                                 |                                                                                       |       |                                                                                     |
| 82 | 18.97    | 500.3                 | 2 | 1259.9316 |             | H5N4F1G2    | 2.2                                                                                   |                                                                                       | 0.015 |  |
|    |          | 543.9                 | 3 | 839.6176  |             | 3.5         | 0.002                                                                                 |                                                                                       |       |                                                                                     |
| 83 | 19.50    | 494.9                 | 2 | 1259.9308 | 2.9         | 0.007       |                                                                                       |                                                                                       |       |                                                                                     |
|    |          | 504.2                 | 2 | 1272.4474 | 2.3         | 0.015       |                                                                                       |                                                                                       |       |                                                                                     |
| 84 | 17.18    | 525.9                 | 2 | 1272.4461 | 3.3         | 0.004       |                                                                                       |                                                                                       |       |                                                                                     |
|    |          | 551.2                 | 3 | 847.9632  | 1.5         | 0.002       |                                                                                       |                                                                                       |       |                                                                                     |
|    |          | 523.1                 | 3 | 847.9633  | 1.4         | 0.004       |                                                                                       |                                                                                       |       |                                                                                     |
| 85 | 17.87    | 504.3                 | 2 | 1272.4483 | H5N5S2      | 1.6         | 0.085                                                                                 |    |       |                                                                                     |
|    |          | 538.4                 | 3 | 847.9622  | 2.7         | 0.015       |                                                                                       |                                                                                       |       |                                                                                     |
|    |          | 474.5                 | 2 | 1272.4473 | 2.4         | 0.001       |                                                                                       |                                                                                       |       |                                                                                     |
| 86 | 18.65    | 496.2                 | 2 | 1272.4465 | 3.0         | 0.017       |                                                                                       |                                                                                       |       |                                                                                     |
|    |          | 541.9                 | 3 | 847.9622  | 2.6         | 0.000       |                                                                                       |                                                                                       |       |                                                                                     |
| 87 | 17.61    | 502.2                 | 3 | 1280.9557 | 1.8         | 0.031       |    |                                                                                       |       |                                                                                     |
| 88 | 16.92    | 495                   | 2 | 1280.9558 | H6N5F1S1    | 1.7         |                                                                                       | 0.064                                                                                 |       |                                                                                     |
|    |          | 508                   | 2 | 1316.4571 | 0.9         | 0.330       |                                                                                       |                                                                                       |       |                                                                                     |
| 89 | 18.79    | 517.5                 | 3 | 877.302   | H5N4S3      | 1.2         | 0.015                                                                                 |    |       |                                                                                     |
|    |          | 543.8                 | 3 | 877.3017  |             | 1.6         | 0.240                                                                                 |                                                                                       |       |                                                                                     |
|    |          | 574.9                 | 3 | 877.3015  |             | 1.9         | 0.004                                                                                 |                                                                                       |       |                                                                                     |
|    |          | 508.4                 | 2 | 1316.4569 |             | 1.1         | 0.367                                                                                 |                                                                                       |       |                                                                                     |
| 90 | 19.39    | 539.5                 | 3 | 877.3019  | 1.4         | 0.116       |                                                                                       |                                                                                       |       |                                                                                     |
|    |          | 578.6                 | 3 | 877.3026  | 0.6         | 0.084       |                                                                                       |                                                                                       |       |                                                                                     |
| 91 | 17.08    | 567.3                 | 3 | 896.6490  | H5N5F1S2    | 1.5         | 0.001                                                                                 |    |       |                                                                                     |
|    |          | 519.4                 | 2 | 1353.4751 | 1.2         | 1.660       |                                                                                       |                                                                                       |       |                                                                                     |
| 92 | 17.89    | 545.7                 | 3 | 901.9808  | 1.4         | 0.528       |                                                                                       |                                                                                       |       |                                                                                     |
|    |          | 576.4                 | 3 | 901.9813  | 0.8         | 0.150       |                                                                                       |                                                                                       |       |                                                                                     |
| 93 | 18.61    | 515.4                 | 2 | 1353.4742 | H6N5S2      | 1.8         | 6.974                                                                                 |  |       |                                                                                     |
|    |          | 547.8                 | 3 | 901.9806  | 1.6         | 2.186       |                                                                                       |                                                                                       |       |                                                                                     |
| 94 | 19.24    | 510.6                 | 2 | 1353.4745 | 1.6         | 1.965       |                                                                                       |                                                                                       |       |                                                                                     |
|    |          | 558.4                 | 3 | 901.981   | 1.2         | 0.495       |                                                                                       |                                                                                       |       |                                                                                     |
| 95 | 17.04    | 528.1                 | 3 | 1389.4826 | 1.8         | 0.017       |  |                                                                                       |       |                                                                                     |
| 96 | 17.74    | 523.5                 | 3 | 1389.4827 | 2.2         | 0.042       |                                                                                       |                                                                                       |       |                                                                                     |
| 97 | 18.26    | 524.7                 | 2 | 1389.4832 | H5N4F1S3    | 2.9         |                                                                                       | 0.017                                                                                 |       |                                                                                     |
| 98 | 18.87    | 525.3                 | 2 | 1389.4842 | 3.3         | 0.008       |                                                                                       |                                                                                       |       |                                                                                     |
| 99 | 19.48    | 520.8                 | 2 | 1389.4847 | 3.3         | 0.003       |                                                                                       |                                                                                       |       |                                                                                     |
|    |          | 520.8                 | 2 | 1389.4847 | 3.3         | 0.003       |                                                                                       |                                                                                       |       |                                                                                     |

# SUPPORTING INFORMATION

| N°  | RT (min) | CCS (Å²) | z | m/z       | Composition | Error (ppm) | Rel. abund. % | Suggested structure |
|-----|----------|----------|---|-----------|-------------|-------------|---------------|---------------------|
| 100 | 19.46    | 554.4    | 3 | 931.3164  | H5N4F1S2G1  | 4.6         | 0.002         |                     |
|     | 20.01    | 513.1    | 2 | 931.3178  |             | 2.9         | 0.009         |                     |
| 101 | 20.01    | 536      | 3 | 931.3180  |             | 2.9         | 0.004         |                     |
|     | 20.01    | 560.3    | 3 | 1397.4807 |             | 2.4         | 0.003         |                     |
| 102 | 20.66    | 515      | 2 | 1397.4807 |             | 2.9         | 0.011         |                     |
|     | 20.66    | 550.9    | 3 | 931.3181  |             | 3.1         | 0.011         |                     |
| 103 | 21.26    | 551.2    | 3 | 931.3185  |             | 2.8         | 0.002         |                     |
|     |          | 528.2    | 2 | 950.6653  |             | 2.3         | 0.077         |                     |
| 104 | 18.23    | 551.3    | 3 | 1426.5023 |             | 2.9         | 0.003         |                     |
|     |          | 563.4    | 3 | 1426.5033 |             | 1.3         | 0.010         |                     |
| 105 | 18.81    | 535.8    | 2 | 1426.5037 |             | 1.6         | 0.345         |                     |
|     |          | 562.8    | 3 | 950.6668  |             | 1.3         | 0.138         |                     |
| 106 | 19.32    | 529.8    | 2 | 950.6668  |             | 1.4         | 0.114         |                     |
|     |          | 575.8    | 3 | 950.6671  |             | 0.9         | 0.044         |                     |
| 107 | 18.91    | 553.6    | 3 | 955.9965  |             | 3.0         | 0.008         |                     |
|     |          | 526.7    | 2 | 955.9968  |             | 2.6         | 0.028         |                     |
| 108 | 19.40    | 540      | 3 | 1434.4994 |             | 3.3         | 0.002         |                     |
|     |          | 531.9    | 2 | 1455.0107 | 3.9         | 0.008       |               |                     |
| 109 | 18.94    | 575.7    | 3 | 969.6729  | 2.3         | 0.003       |               |                     |
|     |          | 540.9    | 2 | 1462.0024 | 2.5         | 0.009       |               |                     |
| 110 | 20.74    | 576.7    | 3 | 974.3331  | H5N4S4      | 1.9         | 0.017         |                     |
| 111 | 19.11    | 538.4    | 2 | 1499.0218 | 1.7         | 0.314       |               |                     |
|     |          | 570.7    | 3 | 999.0112  | 2.7         | 0.600       |               |                     |
|     |          | 665.6    | 4 | 749.007   | 2.1         | 0.011       |               |                     |
|     |          | 536.7    | 2 | 1499.022  | 1.6         | 3.059       |               |                     |
| 112 | 19.87    | 566.6    | 2 | 1499.0222 | 1.4         | 2.137       |               |                     |
|     |          | 578.2    | 3 | 999.0112  | 2.6         | 6.566       |               |                     |
|     |          | 666.4    | 4 | 749.0072  | 1.8         | 0.102       |               |                     |
|     |          | 708.4    | 4 | 749.0077  | 1.1         | 0.018       |               |                     |
|     |          | 542.5    | 2 | 1499.0213 | 2.1         | 4.316       |               |                     |
| 113 | 20.32    | 577.5    | 3 | 999.0112  | 2.6         | 5.744       |               |                     |
|     |          | 654.9    | 4 | 749.0062  | 3.2         | 0.020       |               |                     |
|     |          | 681.3    | 4 | 749.0078  | 1.0         | 0.046       |               |                     |
|     |          | 705.6    | 4 | 749.0065  | 2.8         | 0.002       |               |                     |
|     |          | 547.9    | 2 | 1499.021  | 2.3         | 1.054       |               |                     |
| 114 | 21.04    | 582.4    | 3 | 999.011   | 2.8         | 1.038       |               |                     |
|     |          | 623.6    | 3 | 999.0115  | 2.4         | 0.302       |               |                     |
|     |          | 641.8    | 4 | 749.006   | 3.4         | 0.001       |               |                     |
|     |          | 667.1    | 4 | 749.0071  | 1.9         | 0.004       |               |                     |
| 115 | 21.97    | 682.6    | 4 | 749.0056  | 4.0         | 0.000       |               |                     |
|     |          | 574.2    | 3 | 999.0098  | 4.0         | 0.054       |               |                     |
| 116 | 22.49    | 575.4    | 3 | 999.0102  | 3.6         | 0.078       |               |                     |
|     |          | 541.7    | 2 | 1507.0193 | 1.7         | 1.297       |               |                     |
| 117 | 20.94    | 682.8    | 4 | 753.0063  | H6N5S2G1    | 1.3         | 0.012         |                     |
|     |          | 579.5    | 3 | 1004.3442 | 1.3         | 2.033       |               |                     |

# SUPPORTING INFORMATION

| N°  | RT (min) | CCS (Å²) | z         | m/z       | Composition | Error (ppm) | Rel. abund. % | Suggested structure |
|-----|----------|----------|-----------|-----------|-------------|-------------|---------------|---------------------|
| 118 | 18.94    | 586      | 3         | 1018.3564 | H6N6F1S2    | 4.7         | 0.034         |                     |
| 119 | 19.47    | 554.9    | 2         | 1572.0496 | H6N5F1S3    | 2.4         | 0.024         |                     |
|     |          | 589.1    | 3         | 1047.6982 |             | 1.5         | 0.085         |                     |
| 120 | 19.92    | 555.4    | 2         | 1572.0498 | H6N5F1S3    | 2.3         | 0.072         |                     |
|     |          | 597.7    | 3         | 1047.6982 |             | 1.6         | 0.150         |                     |
| 121 | 20.54    | 683.5    | 4         | 785.5199  | H6N5F1S2G1  | 4.0         | 0.002         |                     |
|     |          | 599.2    | 3         | 1047.698  |             | 1.7         | 0.165         |                     |
| 122 | 20.67    | 555.3    | 2         | 1580.0459 | H6N5F1S2G1  | 3.1         | 0.060         |                     |
|     |          | 595.4    | 3         | 1053.0294 |             | 2.0         | 0.158         |                     |
| 123 | 19.29    | 691.3    | 4         | 795.7798  | H5N6F1S3    | -0.1        | 0.001         |                     |
| 124 | 22.64    | 591.1    | 3         | 1063.6899 | H6N5F1G3    | 4.5         | 0.064         |                     |
| 125 | 20.19    | 562.4    | 2         | 1600.5593 | H6N6S3      | 3.0         | 0.003         |                     |
| 126 | 20.72    | 560.2    |           | 1600.558  |             | 3.8         | 0.008         |                     |
|     |          | 601.8    | 3         | 1066.7036 | 3.2         | 0.027       |               |                     |
| 127 | 21.64    | 571      | 2         | 1644.5686 | H6N5S4      | 2.1         | 2.513         |                     |
|     |          | 604.9    | 3         | 1096.043  |             | 2.4         | 7.601         |                     |
|     |          | 662.7    | 4         | 821.7808  |             | 1.9         | 0.400         |                     |
|     |          | 693.2    |           | 821.7811  |             | 1.6         | 0.164         |                     |
| 128 | 22.27    | 718.9    | 2         | 821.7807  | H6N5S4      | 2.0         | 0.030         |                     |
|     |          | 572.1    |           | 1644.5682 |             | 2.4         | 1.413         |                     |
|     |          | 602.1    | 1644.5678 | 2.6       |             | 0.121       |               |                     |
|     |          | 603.9    | 3         | 1096.0431 |             | 2.3         | 5.210         |                     |
| 129 | 22.39    | 663.3    | 4         | 821.7794  | H6N5S3G1    | 3.7         | 0.002         |                     |
|     |          | 688.7    | 2         | 821.7808  |             | 1.9         | 0.193         |                     |
|     |          | 568.9    |           | 1652.566  |             | 2.1         | 0.237         |                     |
|     |          | 605.5    | 3         | 1101.3752 |             | 1.9         | 1.441         |                     |
| 130 | 20.41    | 664.7    | 4         | 825.7788  | H6N5S3G1    | 2.8         | 0.040         |                     |
|     |          | 692.6    | 4         | 825.7792  |             | 2.4         | 0.023         |                     |
| 131 | 21.07    | 608      | 3         | 1120.7218 | H7N6S3      | 2.5         | 0.013         |                     |
|     |          | 645.3    | 3         | 1120.7219 |             | 2.4         | 0.005         |                     |
| 132 | 21.56    | 579.7    | 2         | 1681.5854 | H7N6S3      | 3.0         | 0.097         |                     |
|     |          | 604      | 3         | 1120.7213 |             | 2.9         | 0.379         |                     |
| 133 | 22.09    | 634.6    | 3         | 1217.753  | H7N6S4      | 2.8         | 0.037         |                     |
|     |          | 701.6    | 4         | 913.0642  |             | 1.4         | 0.005         |                     |
| 134 | 22.54    | 613.5    | 2         | 1827.1335 | H7N6S4      | 2.6         | 0.080         |                     |
|     |          | 714      | 4         | 913.0636  |             | 2.0         | 0.109         |                     |
| 135 | 22.04    | 635.9    | 3         | 1217.7539 | H7N6F1S4    | 2.0         | 0.426         |                     |
|     |          | 709.7    | 4         | 913.0636  |             | 2.0         | 0.085         |                     |

## SUPPORTING INFORMATION

### 2.7 ATD simulations

#### Selection of the starting structures for molecular dynamics (MD) simulations

Several rotamers of  $\alpha$ - and  $\beta$ -anomers of unlabeled oligosaccharides **10** and **11** were generated with Carbohydrate builder, implemented in GLYCAM-Web ([glycam.org](http://glycam.org)). In detail, three staggered conformers of omega dihedral angle ( $\omega$ ) (*gg*, *gt*, and *tg*), together with three staggered conformers of psi dihedral angle ( $\psi$ ) in which the sialic acid is involved, were used. As a result, a total of 243  $\alpha$ -conformers and 243  $\beta$ -conformers for unlabeled compound **10**, and 27  $\alpha$ -conformers and 27  $\beta$ -conformers for unlabeled compound **11** were calculated. These conformers were then ranked in energy. The minimization was performed with AMBER18 package<sup>[4]</sup> in implicit water ( $\epsilon = 80$ ). Based on the theoretical energy, the Maxwell-Boltzmann distribution was calculated to estimate each conformer population (Tables S2-S5).

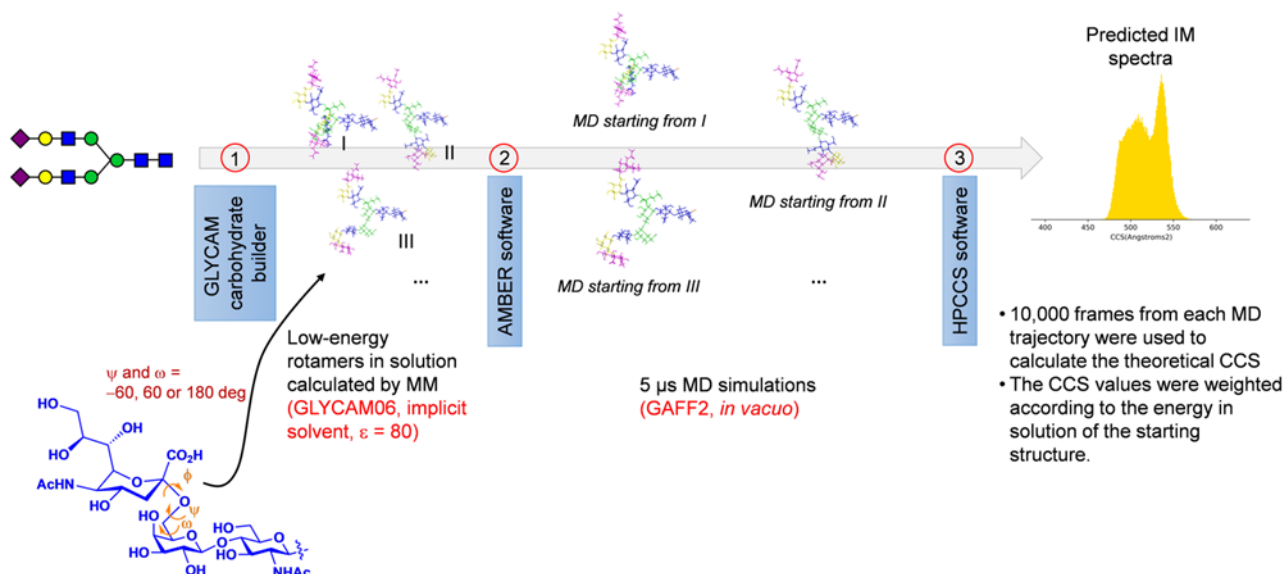

Figure S120. Workflow followed to generate collision cross section distributions (CCSDs).

Table S2: Maxwell-Boltzmann distribution calculated at 300 K for  $\alpha$  anomer of unlabeled **10**.

| Minimized Energy (Kcal/mol) | Minimized Energy (KJ/mol) | $\Delta$ energy ( $\Delta E$ ) (KJ/mol) | $-\Delta E/RT$ | $e^{-E/RT}$ | fraction | % population |
|-----------------------------|---------------------------|-----------------------------------------|----------------|-------------|----------|--------------|
| 29.49                       | 123.44                    | 0.00                                    | 0.00           | 1.00        | 0.22     | 21.96        |
| 29.55                       | 123.68                    | 0.25                                    | -0.10          | 0.90        | 0.20     | 19.83        |
| 29.77                       | 124.62                    | 1.18                                    | -0.49          | 0.61        | 0.13     | 13.49        |
| 29.91                       | 125.18                    | 1.75                                    | -0.72          | 0.49        | 0.11     | 10.68        |
| 30.26                       | 126.66                    | 3.22                                    | -1.33          | 0.26        | 0.06     | 5.81         |
| 30.38                       | 127.18                    | 3.74                                    | -1.54          | 0.21        | 0.05     | 4.69         |
| 30.60                       | 128.11                    | 4.67                                    | -1.93          | 0.15        | 0.03     | 3.19         |
| 30.69                       | 128.46                    | 5.02                                    | -2.07          | 0.13        | 0.03     | 2.76         |
| 30.82                       | 129.00                    | 5.56                                    | -2.29          | 0.10        | 0.02     | 2.21         |

## SUPPORTING INFORMATION

|       |        |       |       |      |      |      |
|-------|--------|-------|-------|------|------|------|
| 30.87 | 129.22 | 5.78  | -2.39 | 0.09 | 0.02 | 2.02 |
| 30.91 | 129.39 | 5.96  | -2.46 | 0.09 | 0.02 | 1.88 |
| 30.94 | 129.52 | 6.08  | -2.51 | 0.08 | 0.02 | 1.78 |
| 31.18 | 130.52 | 7.09  | -2.93 | 0.05 | 0.01 | 1.18 |
| 31.22 | 130.69 | 7.25  | -2.99 | 0.05 | 0.01 | 1.10 |
| 31.22 | 130.70 | 7.27  | -3.00 | 0.05 | 0.01 | 1.09 |
| 31.32 | 131.08 | 7.65  | -3.16 | 0.04 | 0.01 | 0.93 |
| 31.57 | 132.16 | 8.72  | -3.60 | 0.03 | 0.01 | 0.60 |
| 31.62 | 132.35 | 8.91  | -3.68 | 0.03 | 0.01 | 0.55 |
| 31.80 | 133.11 | 9.68  | -3.99 | 0.02 | 0.00 | 0.40 |
| 31.83 | 133.24 | 9.81  | -4.05 | 0.02 | 0.00 | 0.38 |
| 31.85 | 133.32 | 9.88  | -4.08 | 0.02 | 0.00 | 0.37 |
| 31.87 | 133.40 | 9.97  | -4.11 | 0.02 | 0.00 | 0.36 |
| 32.00 | 133.97 | 10.53 | -4.35 | 0.01 | 0.00 | 0.28 |
| 32.10 | 134.36 | 10.93 | -4.51 | 0.01 | 0.00 | 0.24 |
| 32.13 | 134.48 | 11.04 | -4.56 | 0.01 | 0.00 | 0.23 |
| 32.22 | 134.89 | 11.45 | -4.73 | 0.01 | 0.00 | 0.19 |
| 32.33 | 135.35 | 11.91 | -4.92 | 0.01 | 0.00 | 0.16 |
| 32.40 | 135.61 | 12.18 | -5.03 | 0.01 | 0.00 | 0.14 |
| 32.40 | 135.62 | 12.19 | -5.03 | 0.01 | 0.00 | 0.14 |
| 32.58 | 136.37 | 12.93 | -5.34 | 0.00 | 0.00 | 0.11 |
| 32.71 | 136.91 | 13.47 | -5.56 | 0.00 | 0.00 | 0.08 |
| 32.72 | 136.95 | 13.52 | -5.58 | 0.00 | 0.00 | 0.08 |
| 32.77 | 137.16 | 13.73 | -5.67 | 0.00 | 0.00 | 0.08 |
| 32.78 | 137.23 | 13.79 | -5.69 | 0.00 | 0.00 | 0.07 |
| 32.81 | 137.35 | 13.91 | -5.74 | 0.00 | 0.00 | 0.07 |
| 32.84 | 137.46 | 14.02 | -5.79 | 0.00 | 0.00 | 0.07 |
| 32.94 | 137.87 | 14.43 | -5.96 | 0.00 | 0.00 | 0.06 |
| 32.95 | 137.93 | 14.50 | -5.98 | 0.00 | 0.00 | 0.06 |
| 32.97 | 138.00 | 14.56 | -6.01 | 0.00 | 0.00 | 0.05 |
| 33.00 | 138.14 | 14.70 | -6.07 | 0.00 | 0.00 | 0.05 |
| 33.09 | 138.52 | 15.08 | -6.23 | 0.00 | 0.00 | 0.04 |
| 33.10 | 138.54 | 15.11 | -6.24 | 0.00 | 0.00 | 0.04 |
| 33.17 | 138.85 | 15.41 | -6.36 | 0.00 | 0.00 | 0.04 |
| 33.19 | 138.92 | 15.48 | -6.39 | 0.00 | 0.00 | 0.04 |
| 33.29 | 139.36 | 15.92 | -6.57 | 0.00 | 0.00 | 0.03 |
| 33.32 | 139.48 | 16.04 | -6.62 | 0.00 | 0.00 | 0.03 |
| 33.39 | 139.78 | 16.34 | -6.75 | 0.00 | 0.00 | 0.03 |
| 33.44 | 139.98 | 16.54 | -6.83 | 0.00 | 0.00 | 0.02 |
| 33.47 | 140.11 | 16.68 | -6.88 | 0.00 | 0.00 | 0.02 |
| 33.52 | 140.33 | 16.89 | -6.97 | 0.00 | 0.00 | 0.02 |
| 33.58 | 140.58 | 17.14 | -7.08 | 0.00 | 0.00 | 0.02 |
| 33.59 | 140.62 | 17.18 | -7.09 | 0.00 | 0.00 | 0.02 |
| 33.59 | 140.62 | 17.19 | -7.09 | 0.00 | 0.00 | 0.02 |

## SUPPORTING INFORMATION

---

|       |        |       |        |      |      |      |
|-------|--------|-------|--------|------|------|------|
| 33.68 | 140.99 | 17.55 | -7.24  | 0.00 | 0.00 | 0.02 |
| 33.89 | 141.86 | 18.43 | -7.61  | 0.00 | 0.00 | 0.01 |
| 33.93 | 142.03 | 18.59 | -7.67  | 0.00 | 0.00 | 0.01 |
| 33.93 | 142.04 | 18.61 | -7.68  | 0.00 | 0.00 | 0.01 |
| 34.01 | 142.38 | 18.94 | -7.82  | 0.00 | 0.00 | 0.01 |
| 34.02 | 142.40 | 18.96 | -7.83  | 0.00 | 0.00 | 0.01 |
| 34.12 | 142.81 | 19.37 | -7.99  | 0.00 | 0.00 | 0.01 |
| 34.13 | 142.88 | 19.44 | -8.02  | 0.00 | 0.00 | 0.01 |
| 34.17 | 143.05 | 19.62 | -8.10  | 0.00 | 0.00 | 0.01 |
| 34.26 | 143.41 | 19.98 | -8.25  | 0.00 | 0.00 | 0.01 |
| 34.27 | 143.45 | 20.01 | -8.26  | 0.00 | 0.00 | 0.01 |
| 34.28 | 143.49 | 20.05 | -8.28  | 0.00 | 0.00 | 0.01 |
| 34.31 | 143.63 | 20.20 | -8.34  | 0.00 | 0.00 | 0.01 |
| 34.41 | 144.03 | 20.60 | -8.50  | 0.00 | 0.00 | 0.00 |
| 34.61 | 144.88 | 21.44 | -8.85  | 0.00 | 0.00 | 0.00 |
| 34.62 | 144.91 | 21.47 | -8.86  | 0.00 | 0.00 | 0.00 |
| 34.63 | 144.97 | 21.53 | -8.89  | 0.00 | 0.00 | 0.00 |
| 34.64 | 145.01 | 21.57 | -8.90  | 0.00 | 0.00 | 0.00 |
| 34.66 | 145.10 | 21.67 | -8.94  | 0.00 | 0.00 | 0.00 |
| 34.68 | 145.18 | 21.74 | -8.97  | 0.00 | 0.00 | 0.00 |
| 34.71 | 145.28 | 21.84 | -9.02  | 0.00 | 0.00 | 0.00 |
| 34.72 | 145.35 | 21.91 | -9.04  | 0.00 | 0.00 | 0.00 |
| 34.88 | 146.00 | 22.57 | -9.31  | 0.00 | 0.00 | 0.00 |
| 34.92 | 146.17 | 22.73 | -9.38  | 0.00 | 0.00 | 0.00 |
| 34.97 | 146.40 | 22.96 | -9.48  | 0.00 | 0.00 | 0.00 |
| 35.01 | 146.55 | 23.12 | -9.54  | 0.00 | 0.00 | 0.00 |
| 35.01 | 146.56 | 23.13 | -9.55  | 0.00 | 0.00 | 0.00 |
| 35.04 | 146.66 | 23.22 | -9.58  | 0.00 | 0.00 | 0.00 |
| 35.10 | 146.92 | 23.48 | -9.69  | 0.00 | 0.00 | 0.00 |
| 35.14 | 147.10 | 23.67 | -9.77  | 0.00 | 0.00 | 0.00 |
| 35.17 | 147.20 | 23.76 | -9.81  | 0.00 | 0.00 | 0.00 |
| 35.22 | 147.44 | 24.00 | -9.91  | 0.00 | 0.00 | 0.00 |
| 35.24 | 147.51 | 24.07 | -9.93  | 0.00 | 0.00 | 0.00 |
| 35.39 | 148.15 | 24.71 | -10.20 | 0.00 | 0.00 | 0.00 |
| 35.47 | 148.46 | 25.02 | -10.33 | 0.00 | 0.00 | 0.00 |
| 35.53 | 148.73 | 25.29 | -10.44 | 0.00 | 0.00 | 0.00 |
| 35.53 | 148.73 | 25.30 | -10.44 | 0.00 | 0.00 | 0.00 |
| 35.56 | 148.85 | 25.42 | -10.49 | 0.00 | 0.00 | 0.00 |
| 35.59 | 148.97 | 25.53 | -10.54 | 0.00 | 0.00 | 0.00 |
| 35.60 | 149.01 | 25.58 | -10.56 | 0.00 | 0.00 | 0.00 |
| 35.61 | 149.05 | 25.61 | -10.57 | 0.00 | 0.00 | 0.00 |
| 35.62 | 149.11 | 25.67 | -10.59 | 0.00 | 0.00 | 0.00 |
| 35.64 | 149.18 | 25.74 | -10.63 | 0.00 | 0.00 | 0.00 |
| 35.65 | 149.24 | 25.80 | -10.65 | 0.00 | 0.00 | 0.00 |



## SUPPORTING INFORMATION

---

|       |        |       |        |      |      |      |
|-------|--------|-------|--------|------|------|------|
| 35.70 | 149.44 | 26.00 | -10.73 | 0.00 | 0.00 | 0.00 |
| 35.71 | 149.49 | 26.05 | -10.75 | 0.00 | 0.00 | 0.00 |
| 35.76 | 149.67 | 26.23 | -10.83 | 0.00 | 0.00 | 0.00 |
| 35.82 | 149.96 | 26.52 | -10.95 | 0.00 | 0.00 | 0.00 |
| 35.85 | 150.07 | 26.63 | -10.99 | 0.00 | 0.00 | 0.00 |
| 35.89 | 150.23 | 26.79 | -11.06 | 0.00 | 0.00 | 0.00 |
| 35.90 | 150.26 | 26.82 | -11.07 | 0.00 | 0.00 | 0.00 |
| 35.92 | 150.35 | 26.91 | -11.11 | 0.00 | 0.00 | 0.00 |
| 35.94 | 150.44 | 27.00 | -11.15 | 0.00 | 0.00 | 0.00 |
| 35.96 | 150.51 | 27.08 | -11.18 | 0.00 | 0.00 | 0.00 |
| 36.06 | 150.96 | 27.52 | -11.36 | 0.00 | 0.00 | 0.00 |
| 36.08 | 151.02 | 27.58 | -11.38 | 0.00 | 0.00 | 0.00 |
| 36.10 | 151.11 | 27.68 | -11.42 | 0.00 | 0.00 | 0.00 |
| 36.11 | 151.15 | 27.71 | -11.44 | 0.00 | 0.00 | 0.00 |
| 36.12 | 151.19 | 27.76 | -11.46 | 0.00 | 0.00 | 0.00 |
| 36.12 | 151.21 | 27.77 | -11.46 | 0.00 | 0.00 | 0.00 |
| 36.15 | 151.31 | 27.87 | -11.50 | 0.00 | 0.00 | 0.00 |
| 36.21 | 151.58 | 28.14 | -11.61 | 0.00 | 0.00 | 0.00 |
| 36.36 | 152.19 | 28.75 | -11.87 | 0.00 | 0.00 | 0.00 |
| 36.41 | 152.42 | 28.99 | -11.96 | 0.00 | 0.00 | 0.00 |
| 36.42 | 152.44 | 29.00 | -11.97 | 0.00 | 0.00 | 0.00 |
| 36.44 | 152.55 | 29.12 | -12.02 | 0.00 | 0.00 | 0.00 |
| 36.57 | 153.08 | 29.65 | -12.24 | 0.00 | 0.00 | 0.00 |
| 36.60 | 153.19 | 29.75 | -12.28 | 0.00 | 0.00 | 0.00 |
| 36.74 | 153.77 | 30.34 | -12.52 | 0.00 | 0.00 | 0.00 |
| 36.84 | 154.22 | 30.78 | -12.70 | 0.00 | 0.00 | 0.00 |
| 36.92 | 154.53 | 31.09 | -12.83 | 0.00 | 0.00 | 0.00 |
| 36.93 | 154.59 | 31.15 | -12.86 | 0.00 | 0.00 | 0.00 |
| 36.98 | 154.78 | 31.34 | -12.94 | 0.00 | 0.00 | 0.00 |
| 37.02 | 154.97 | 31.53 | -13.01 | 0.00 | 0.00 | 0.00 |
| 37.06 | 155.13 | 31.69 | -13.08 | 0.00 | 0.00 | 0.00 |
| 37.08 | 155.22 | 31.78 | -13.12 | 0.00 | 0.00 | 0.00 |
| 37.10 | 155.29 | 31.86 | -13.15 | 0.00 | 0.00 | 0.00 |
| 37.18 | 155.63 | 32.19 | -13.29 | 0.00 | 0.00 | 0.00 |
| 37.20 | 155.73 | 32.29 | -13.33 | 0.00 | 0.00 | 0.00 |
| 37.22 | 155.79 | 32.36 | -13.36 | 0.00 | 0.00 | 0.00 |
| 37.22 | 155.80 | 32.36 | -13.36 | 0.00 | 0.00 | 0.00 |
| 37.27 | 156.02 | 32.59 | -13.45 | 0.00 | 0.00 | 0.00 |
| 37.30 | 156.15 | 32.71 | -13.50 | 0.00 | 0.00 | 0.00 |
| 37.31 | 156.20 | 32.76 | -13.52 | 0.00 | 0.00 | 0.00 |
| 37.42 | 156.62 | 33.19 | -13.70 | 0.00 | 0.00 | 0.00 |
| 37.45 | 156.74 | 33.31 | -13.75 | 0.00 | 0.00 | 0.00 |
| 37.52 | 157.06 | 33.63 | -13.88 | 0.00 | 0.00 | 0.00 |
| 37.54 | 157.15 | 33.72 | -13.92 | 0.00 | 0.00 | 0.00 |

## SUPPORTING INFORMATION

---

|       |        |       |        |      |      |      |
|-------|--------|-------|--------|------|------|------|
| 37.59 | 157.35 | 33.91 | -14.00 | 0.00 | 0.00 | 0.00 |
| 37.65 | 157.61 | 34.17 | -14.10 | 0.00 | 0.00 | 0.00 |
| 37.67 | 157.69 | 34.26 | -14.14 | 0.00 | 0.00 | 0.00 |
| 37.70 | 157.80 | 34.36 | -14.18 | 0.00 | 0.00 | 0.00 |
| 37.72 | 157.89 | 34.45 | -14.22 | 0.00 | 0.00 | 0.00 |
| 37.73 | 157.92 | 34.48 | -14.23 | 0.00 | 0.00 | 0.00 |
| 37.79 | 158.18 | 34.74 | -14.34 | 0.00 | 0.00 | 0.00 |
| 37.84 | 158.38 | 34.94 | -14.42 | 0.00 | 0.00 | 0.00 |
| 37.85 | 158.45 | 35.01 | -14.45 | 0.00 | 0.00 | 0.00 |
| 37.97 | 158.93 | 35.49 | -14.65 | 0.00 | 0.00 | 0.00 |
| 37.97 | 158.94 | 35.51 | -14.66 | 0.00 | 0.00 | 0.00 |
| 38.00 | 159.06 | 35.62 | -14.70 | 0.00 | 0.00 | 0.00 |
| 38.04 | 159.24 | 35.80 | -14.78 | 0.00 | 0.00 | 0.00 |
| 38.15 | 159.70 | 36.26 | -14.97 | 0.00 | 0.00 | 0.00 |
| 38.26 | 160.14 | 36.71 | -15.15 | 0.00 | 0.00 | 0.00 |
| 38.29 | 160.29 | 36.85 | -15.21 | 0.00 | 0.00 | 0.00 |
| 38.31 | 160.38 | 36.95 | -15.25 | 0.00 | 0.00 | 0.00 |
| 38.38 | 160.66 | 37.23 | -15.37 | 0.00 | 0.00 | 0.00 |
| 38.39 | 160.72 | 37.28 | -15.39 | 0.00 | 0.00 | 0.00 |
| 38.44 | 160.90 | 37.46 | -15.46 | 0.00 | 0.00 | 0.00 |
| 38.45 | 160.96 | 37.52 | -15.49 | 0.00 | 0.00 | 0.00 |
| 38.48 | 161.06 | 37.62 | -15.53 | 0.00 | 0.00 | 0.00 |
| 38.49 | 161.13 | 37.69 | -15.56 | 0.00 | 0.00 | 0.00 |
| 38.53 | 161.27 | 37.84 | -15.62 | 0.00 | 0.00 | 0.00 |
| 38.63 | 161.71 | 38.27 | -15.80 | 0.00 | 0.00 | 0.00 |
| 38.67 | 161.86 | 38.42 | -15.86 | 0.00 | 0.00 | 0.00 |
| 38.77 | 162.27 | 38.83 | -16.03 | 0.00 | 0.00 | 0.00 |
| 38.83 | 162.53 | 39.09 | -16.13 | 0.00 | 0.00 | 0.00 |
| 39.11 | 163.72 | 40.29 | -16.63 | 0.00 | 0.00 | 0.00 |
| 39.13 | 163.80 | 40.37 | -16.66 | 0.00 | 0.00 | 0.00 |
| 39.15 | 163.86 | 40.42 | -16.69 | 0.00 | 0.00 | 0.00 |
| 39.20 | 164.07 | 40.63 | -16.77 | 0.00 | 0.00 | 0.00 |
| 39.20 | 164.07 | 40.64 | -16.77 | 0.00 | 0.00 | 0.00 |
| 39.21 | 164.12 | 40.69 | -16.79 | 0.00 | 0.00 | 0.00 |
| 39.25 | 164.30 | 40.87 | -16.87 | 0.00 | 0.00 | 0.00 |
| 39.27 | 164.40 | 40.96 | -16.91 | 0.00 | 0.00 | 0.00 |
| 39.37 | 164.81 | 41.37 | -17.08 | 0.00 | 0.00 | 0.00 |
| 39.49 | 165.31 | 41.87 | -17.28 | 0.00 | 0.00 | 0.00 |
| 39.53 | 165.47 | 42.04 | -17.35 | 0.00 | 0.00 | 0.00 |
| 39.79 | 166.56 | 43.12 | -17.80 | 0.00 | 0.00 | 0.00 |
| 39.79 | 166.57 | 43.13 | -17.80 | 0.00 | 0.00 | 0.00 |
| 39.87 | 166.91 | 43.48 | -17.94 | 0.00 | 0.00 | 0.00 |
| 39.89 | 166.99 | 43.56 | -17.98 | 0.00 | 0.00 | 0.00 |
| 39.90 | 167.03 | 43.60 | -17.99 | 0.00 | 0.00 | 0.00 |

## SUPPORTING INFORMATION

---

|       |        |       |        |      |      |      |
|-------|--------|-------|--------|------|------|------|
| 39.98 | 167.34 | 43.90 | -18.12 | 0.00 | 0.00 | 0.00 |
| 40.05 | 167.65 | 44.21 | -18.25 | 0.00 | 0.00 | 0.00 |
| 40.06 | 167.70 | 44.26 | -18.27 | 0.00 | 0.00 | 0.00 |
| 40.12 | 167.93 | 44.49 | -18.36 | 0.00 | 0.00 | 0.00 |
| 40.12 | 167.94 | 44.50 | -18.37 | 0.00 | 0.00 | 0.00 |
| 40.26 | 168.54 | 45.10 | -18.62 | 0.00 | 0.00 | 0.00 |
| 40.32 | 168.79 | 45.35 | -18.72 | 0.00 | 0.00 | 0.00 |
| 40.33 | 168.82 | 45.38 | -18.73 | 0.00 | 0.00 | 0.00 |
| 40.35 | 168.91 | 45.47 | -18.77 | 0.00 | 0.00 | 0.00 |
| 40.56 | 169.78 | 46.35 | -19.13 | 0.00 | 0.00 | 0.00 |
| 40.68 | 170.28 | 46.85 | -19.34 | 0.00 | 0.00 | 0.00 |
| 40.80 | 170.79 | 47.35 | -19.54 | 0.00 | 0.00 | 0.00 |
| 40.82 | 170.86 | 47.43 | -19.58 | 0.00 | 0.00 | 0.00 |
| 40.85 | 171.01 | 47.57 | -19.63 | 0.00 | 0.00 | 0.00 |
| 41.01 | 171.68 | 48.24 | -19.91 | 0.00 | 0.00 | 0.00 |
| 41.19 | 172.44 | 49.00 | -20.23 | 0.00 | 0.00 | 0.00 |
| 41.25 | 172.67 | 49.24 | -20.32 | 0.00 | 0.00 | 0.00 |
| 41.30 | 172.90 | 49.46 | -20.42 | 0.00 | 0.00 | 0.00 |
| 41.35 | 173.11 | 49.67 | -20.50 | 0.00 | 0.00 | 0.00 |
| 41.40 | 173.31 | 49.88 | -20.59 | 0.00 | 0.00 | 0.00 |
| 41.50 | 173.70 | 50.26 | -20.75 | 0.00 | 0.00 | 0.00 |
| 41.50 | 173.72 | 50.29 | -20.76 | 0.00 | 0.00 | 0.00 |
| 41.50 | 173.73 | 50.29 | -20.76 | 0.00 | 0.00 | 0.00 |
| 41.51 | 173.75 | 50.32 | -20.77 | 0.00 | 0.00 | 0.00 |
| 41.63 | 174.26 | 50.82 | -20.98 | 0.00 | 0.00 | 0.00 |
| 41.83 | 175.10 | 51.66 | -21.32 | 0.00 | 0.00 | 0.00 |
| 42.01 | 175.84 | 52.40 | -21.63 | 0.00 | 0.00 | 0.00 |
| 42.06 | 176.08 | 52.64 | -21.73 | 0.00 | 0.00 | 0.00 |
| 42.84 | 179.34 | 55.91 | -23.08 | 0.00 | 0.00 | 0.00 |
| 42.88 | 179.50 | 56.06 | -23.14 | 0.00 | 0.00 | 0.00 |
| 42.89 | 179.52 | 56.08 | -23.15 | 0.00 | 0.00 | 0.00 |
| 42.91 | 179.63 | 56.20 | -23.20 | 0.00 | 0.00 | 0.00 |
| 42.92 | 179.67 | 56.23 | -23.21 | 0.00 | 0.00 | 0.00 |
| 42.96 | 179.85 | 56.41 | -23.28 | 0.00 | 0.00 | 0.00 |
| 43.04 | 180.16 | 56.72 | -23.41 | 0.00 | 0.00 | 0.00 |
| 43.27 | 181.13 | 57.69 | -23.81 | 0.00 | 0.00 | 0.00 |
| 43.29 | 181.21 | 57.78 | -23.85 | 0.00 | 0.00 | 0.00 |
| 43.67 | 182.81 | 59.37 | -24.51 | 0.00 | 0.00 | 0.00 |
| 43.81 | 183.39 | 59.95 | -24.75 | 0.00 | 0.00 | 0.00 |
| 43.83 | 183.49 | 60.05 | -24.79 | 0.00 | 0.00 | 0.00 |
| 43.87 | 183.63 | 60.19 | -24.85 | 0.00 | 0.00 | 0.00 |
| 43.98 | 184.09 | 60.65 | -25.03 | 0.00 | 0.00 | 0.00 |
| 44.11 | 184.65 | 61.21 | -25.27 | 0.00 | 0.00 | 0.00 |
| 44.11 | 184.65 | 61.22 | -25.27 | 0.00 | 0.00 | 0.00 |

## SUPPORTING INFORMATION

|       |        |       |        |      |      |      |
|-------|--------|-------|--------|------|------|------|
| 44.19 | 184.98 | 61.55 | -25.40 | 0.00 | 0.00 | 0.00 |
| 44.76 | 187.36 | 63.92 | -26.38 | 0.00 | 0.00 | 0.00 |
| 44.86 | 187.78 | 64.35 | -26.56 | 0.00 | 0.00 | 0.00 |
| 45.37 | 189.92 | 66.49 | -27.44 | 0.00 | 0.00 | 0.00 |
| 45.49 | 190.40 | 66.96 | -27.64 | 0.00 | 0.00 | 0.00 |
| 45.77 | 191.61 | 68.17 | -28.14 | 0.00 | 0.00 | 0.00 |
| 45.83 | 191.86 | 68.42 | -28.24 | 0.00 | 0.00 | 0.00 |
| 45.92 | 192.23 | 68.80 | -28.40 | 0.00 | 0.00 | 0.00 |
| 46.33 | 193.95 | 70.52 | -29.11 | 0.00 | 0.00 | 0.00 |
| 46.96 | 196.56 | 73.12 | -30.18 | 0.00 | 0.00 | 0.00 |
| 47.30 | 197.99 | 74.55 | -30.77 | 0.00 | 0.00 | 0.00 |
| 47.72 | 199.75 | 76.31 | -31.50 | 0.00 | 0.00 | 0.00 |
| 49.96 | 209.13 | 85.69 | -35.37 | 0.00 | 0.00 | 0.00 |
| 50.80 | 212.63 | 89.20 | -36.82 | 0.00 | 0.00 | 0.00 |

**Table S3:** Maxwell-Boltzmann distribution calculated at 300 K for  $\beta$  anomer of unlabeled **10**.

| Minimized Energy (Kcal/mol) | Minimized Energy (KJ/mol) | $\Delta$ energy ( $\Delta E$ ) (KJ/mol) | $-\Delta E/RT$ | $e^{-E/RT}$ | fraction | % population |
|-----------------------------|---------------------------|-----------------------------------------|----------------|-------------|----------|--------------|
| 28.55                       | 119.49                    | 0.00                                    | 0.00           | 1.00        | 0.19     | 19.44        |
| 28.83                       | 120.69                    | 1.19                                    | -0.49          | 0.61        | 0.12     | 11.88        |
| 28.87                       | 120.84                    | 1.35                                    | -0.56          | 0.57        | 0.11     | 11.14        |
| 28.89                       | 120.93                    | 1.43                                    | -0.59          | 0.55        | 0.11     | 10.77        |
| 29.02                       | 121.47                    | 1.97                                    | -0.81          | 0.44        | 0.09     | 8.62         |
| 29.37                       | 122.95                    | 3.45                                    | -1.43          | 0.24        | 0.05     | 4.67         |
| 29.38                       | 122.97                    | 3.48                                    | -1.44          | 0.24        | 0.05     | 4.63         |
| 29.44                       | 123.24                    | 3.74                                    | -1.54          | 0.21        | 0.04     | 4.15         |
| 29.57                       | 123.77                    | 4.27                                    | -1.76          | 0.17        | 0.03     | 3.33         |
| 29.65                       | 124.10                    | 4.60                                    | -1.90          | 0.15        | 0.03     | 2.91         |
| 29.65                       | 124.10                    | 4.61                                    | -1.90          | 0.15        | 0.03     | 2.90         |
| 29.70                       | 124.31                    | 4.82                                    | -1.99          | 0.14        | 0.03     | 2.66         |
| 30.16                       | 126.25                    | 6.76                                    | -2.79          | 0.06        | 0.01     | 1.19         |
| 30.19                       | 126.38                    | 6.88                                    | -2.84          | 0.06        | 0.01     | 1.14         |
| 30.26                       | 126.68                    | 7.18                                    | -2.96          | 0.05        | 0.01     | 1.00         |
| 30.30                       | 126.84                    | 7.35                                    | -3.03          | 0.05        | 0.01     | 0.94         |
| 30.35                       | 127.03                    | 7.53                                    | -3.11          | 0.04        | 0.01     | 0.87         |
| 30.37                       | 127.12                    | 7.63                                    | -3.15          | 0.04        | 0.01     | 0.83         |
| 30.37                       | 127.14                    | 7.65                                    | -3.16          | 0.04        | 0.01     | 0.83         |
| 30.45                       | 127.45                    | 7.96                                    | -3.28          | 0.04        | 0.01     | 0.73         |
| 30.58                       | 128.02                    | 8.52                                    | -3.52          | 0.03        | 0.01     | 0.58         |
| 30.73                       | 128.64                    | 9.15                                    | -3.78          | 0.02        | 0.00     | 0.45         |

## SUPPORTING INFORMATION

|       |        |       |       |      |      |      |
|-------|--------|-------|-------|------|------|------|
| 30.75 | 128.74 | 9.24  | -3.81 | 0.02 | 0.00 | 0.43 |
| 30.80 | 128.94 | 9.45  | -3.90 | 0.02 | 0.00 | 0.39 |
| 30.97 | 129.62 | 10.13 | -4.18 | 0.02 | 0.00 | 0.30 |
| 31.03 | 129.90 | 10.40 | -4.29 | 0.01 | 0.00 | 0.27 |
| 31.08 | 130.11 | 10.62 | -4.38 | 0.01 | 0.00 | 0.24 |
| 31.14 | 130.36 | 10.87 | -4.49 | 0.01 | 0.00 | 0.22 |
| 31.16 | 130.44 | 10.95 | -4.52 | 0.01 | 0.00 | 0.21 |
| 31.21 | 130.66 | 11.16 | -4.61 | 0.01 | 0.00 | 0.19 |
| 31.26 | 130.86 | 11.37 | -4.69 | 0.01 | 0.00 | 0.18 |
| 31.29 | 130.97 | 11.47 | -4.74 | 0.01 | 0.00 | 0.17 |
| 31.31 | 131.05 | 11.56 | -4.77 | 0.01 | 0.00 | 0.16 |
| 31.43 | 131.55 | 12.06 | -4.98 | 0.01 | 0.00 | 0.13 |
| 31.51 | 131.90 | 12.40 | -5.12 | 0.01 | 0.00 | 0.12 |
| 31.65 | 132.47 | 12.98 | -5.36 | 0.00 | 0.00 | 0.09 |
| 31.66 | 132.54 | 13.05 | -5.39 | 0.00 | 0.00 | 0.09 |
| 31.70 | 132.71 | 13.22 | -5.45 | 0.00 | 0.00 | 0.08 |
| 31.81 | 133.17 | 13.67 | -5.64 | 0.00 | 0.00 | 0.07 |
| 31.86 | 133.36 | 13.87 | -5.72 | 0.00 | 0.00 | 0.06 |
| 31.88 | 133.43 | 13.94 | -5.75 | 0.00 | 0.00 | 0.06 |
| 31.90 | 133.53 | 14.03 | -5.79 | 0.00 | 0.00 | 0.06 |
| 31.90 | 133.53 | 14.04 | -5.80 | 0.00 | 0.00 | 0.06 |
| 31.91 | 133.57 | 14.07 | -5.81 | 0.00 | 0.00 | 0.06 |
| 31.97 | 133.83 | 14.34 | -5.92 | 0.00 | 0.00 | 0.05 |
| 32.01 | 134.01 | 14.51 | -5.99 | 0.00 | 0.00 | 0.05 |
| 32.03 | 134.09 | 14.60 | -6.03 | 0.00 | 0.00 | 0.05 |
| 32.04 | 134.12 | 14.62 | -6.04 | 0.00 | 0.00 | 0.05 |
| 32.06 | 134.19 | 14.70 | -6.07 | 0.00 | 0.00 | 0.05 |
| 32.18 | 134.70 | 15.20 | -6.28 | 0.00 | 0.00 | 0.04 |
| 32.19 | 134.73 | 15.23 | -6.29 | 0.00 | 0.00 | 0.04 |
| 32.20 | 134.81 | 15.31 | -6.32 | 0.00 | 0.00 | 0.03 |
| 32.22 | 134.86 | 15.36 | -6.34 | 0.00 | 0.00 | 0.03 |
| 32.24 | 134.94 | 15.45 | -6.38 | 0.00 | 0.00 | 0.03 |
| 32.31 | 135.25 | 15.75 | -6.50 | 0.00 | 0.00 | 0.03 |
| 32.47 | 135.94 | 16.44 | -6.79 | 0.00 | 0.00 | 0.02 |
| 32.58 | 136.37 | 16.88 | -6.97 | 0.00 | 0.00 | 0.02 |
| 32.62 | 136.55 | 17.05 | -7.04 | 0.00 | 0.00 | 0.02 |
| 32.68 | 136.79 | 17.30 | -7.14 | 0.00 | 0.00 | 0.02 |
| 32.74 | 137.03 | 17.54 | -7.24 | 0.00 | 0.00 | 0.01 |
| 32.76 | 137.15 | 17.65 | -7.29 | 0.00 | 0.00 | 0.01 |
| 32.78 | 137.20 | 17.71 | -7.31 | 0.00 | 0.00 | 0.01 |
| 32.81 | 137.33 | 17.84 | -7.36 | 0.00 | 0.00 | 0.01 |
| 32.82 | 137.37 | 17.87 | -7.38 | 0.00 | 0.00 | 0.01 |
| 32.83 | 137.41 | 17.92 | -7.39 | 0.00 | 0.00 | 0.01 |
| 32.92 | 137.78 | 18.29 | -7.55 | 0.00 | 0.00 | 0.01 |

## SUPPORTING INFORMATION

|       |        |       |        |      |      |      |
|-------|--------|-------|--------|------|------|------|
| 32.99 | 138.11 | 18.62 | -7.68  | 0.00 | 0.00 | 0.01 |
| 33.01 | 138.16 | 18.67 | -7.70  | 0.00 | 0.00 | 0.01 |
| 33.06 | 138.38 | 18.88 | -7.79  | 0.00 | 0.00 | 0.01 |
| 33.18 | 138.90 | 19.40 | -8.01  | 0.00 | 0.00 | 0.01 |
| 33.19 | 138.91 | 19.42 | -8.02  | 0.00 | 0.00 | 0.01 |
| 33.20 | 138.99 | 19.50 | -8.05  | 0.00 | 0.00 | 0.01 |
| 33.35 | 139.60 | 20.11 | -8.30  | 0.00 | 0.00 | 0.00 |
| 33.43 | 139.92 | 20.43 | -8.43  | 0.00 | 0.00 | 0.00 |
| 33.46 | 140.08 | 20.58 | -8.50  | 0.00 | 0.00 | 0.00 |
| 33.54 | 140.42 | 20.92 | -8.64  | 0.00 | 0.00 | 0.00 |
| 33.60 | 140.65 | 21.16 | -8.73  | 0.00 | 0.00 | 0.00 |
| 33.67 | 140.96 | 21.47 | -8.86  | 0.00 | 0.00 | 0.00 |
| 33.72 | 141.14 | 21.65 | -8.94  | 0.00 | 0.00 | 0.00 |
| 33.75 | 141.27 | 21.78 | -8.99  | 0.00 | 0.00 | 0.00 |
| 33.89 | 141.85 | 22.35 | -9.23  | 0.00 | 0.00 | 0.00 |
| 33.94 | 142.07 | 22.58 | -9.32  | 0.00 | 0.00 | 0.00 |
| 33.95 | 142.12 | 22.63 | -9.34  | 0.00 | 0.00 | 0.00 |
| 33.97 | 142.21 | 22.71 | -9.38  | 0.00 | 0.00 | 0.00 |
| 34.00 | 142.32 | 22.83 | -9.42  | 0.00 | 0.00 | 0.00 |
| 34.01 | 142.36 | 22.87 | -9.44  | 0.00 | 0.00 | 0.00 |
| 34.06 | 142.56 | 23.06 | -9.52  | 0.00 | 0.00 | 0.00 |
| 34.09 | 142.68 | 23.19 | -9.57  | 0.00 | 0.00 | 0.00 |
| 34.14 | 142.91 | 23.41 | -9.66  | 0.00 | 0.00 | 0.00 |
| 34.16 | 142.99 | 23.50 | -9.70  | 0.00 | 0.00 | 0.00 |
| 34.17 | 143.02 | 23.53 | -9.71  | 0.00 | 0.00 | 0.00 |
| 34.19 | 143.12 | 23.63 | -9.75  | 0.00 | 0.00 | 0.00 |
| 34.20 | 143.15 | 23.66 | -9.76  | 0.00 | 0.00 | 0.00 |
| 34.21 | 143.19 | 23.70 | -9.78  | 0.00 | 0.00 | 0.00 |
| 34.23 | 143.29 | 23.80 | -9.82  | 0.00 | 0.00 | 0.00 |
| 34.26 | 143.42 | 23.93 | -9.88  | 0.00 | 0.00 | 0.00 |
| 34.27 | 143.47 | 23.98 | -9.90  | 0.00 | 0.00 | 0.00 |
| 34.28 | 143.48 | 23.99 | -9.90  | 0.00 | 0.00 | 0.00 |
| 34.28 | 143.50 | 24.01 | -9.91  | 0.00 | 0.00 | 0.00 |
| 34.29 | 143.55 | 24.05 | -9.93  | 0.00 | 0.00 | 0.00 |
| 34.31 | 143.63 | 24.13 | -9.96  | 0.00 | 0.00 | 0.00 |
| 34.32 | 143.65 | 24.16 | -9.97  | 0.00 | 0.00 | 0.00 |
| 34.32 | 143.67 | 24.17 | -9.98  | 0.00 | 0.00 | 0.00 |
| 34.33 | 143.70 | 24.20 | -9.99  | 0.00 | 0.00 | 0.00 |
| 34.51 | 144.45 | 24.96 | -10.30 | 0.00 | 0.00 | 0.00 |
| 34.53 | 144.56 | 25.07 | -10.35 | 0.00 | 0.00 | 0.00 |
| 34.54 | 144.57 | 25.08 | -10.35 | 0.00 | 0.00 | 0.00 |
| 34.64 | 145.00 | 25.51 | -10.53 | 0.00 | 0.00 | 0.00 |
| 34.64 | 145.01 | 25.51 | -10.53 | 0.00 | 0.00 | 0.00 |
| 34.68 | 145.15 | 25.66 | -10.59 | 0.00 | 0.00 | 0.00 |

## SUPPORTING INFORMATION

---

|       |        |       |        |      |      |      |
|-------|--------|-------|--------|------|------|------|
| 34.84 | 145.84 | 26.35 | -10.87 | 0.00 | 0.00 | 0.00 |
| 34.90 | 146.09 | 26.60 | -10.98 | 0.00 | 0.00 | 0.00 |
| 35.01 | 146.55 | 27.05 | -11.17 | 0.00 | 0.00 | 0.00 |
| 35.06 | 146.76 | 27.26 | -11.25 | 0.00 | 0.00 | 0.00 |
| 35.07 | 146.80 | 27.31 | -11.27 | 0.00 | 0.00 | 0.00 |
| 35.08 | 146.86 | 27.36 | -11.29 | 0.00 | 0.00 | 0.00 |
| 35.09 | 146.90 | 27.41 | -11.31 | 0.00 | 0.00 | 0.00 |
| 35.10 | 146.94 | 27.45 | -11.33 | 0.00 | 0.00 | 0.00 |
| 35.12 | 147.00 | 27.50 | -11.35 | 0.00 | 0.00 | 0.00 |
| 35.21 | 147.37 | 27.88 | -11.51 | 0.00 | 0.00 | 0.00 |
| 35.22 | 147.44 | 27.95 | -11.54 | 0.00 | 0.00 | 0.00 |
| 35.33 | 147.90 | 28.40 | -11.72 | 0.00 | 0.00 | 0.00 |
| 35.45 | 148.39 | 28.89 | -11.93 | 0.00 | 0.00 | 0.00 |
| 35.48 | 148.54 | 29.04 | -11.99 | 0.00 | 0.00 | 0.00 |
| 35.52 | 148.69 | 29.19 | -12.05 | 0.00 | 0.00 | 0.00 |
| 35.57 | 148.88 | 29.38 | -12.13 | 0.00 | 0.00 | 0.00 |
| 35.65 | 149.24 | 29.75 | -12.28 | 0.00 | 0.00 | 0.00 |
| 35.66 | 149.28 | 29.78 | -12.29 | 0.00 | 0.00 | 0.00 |
| 35.67 | 149.33 | 29.83 | -12.31 | 0.00 | 0.00 | 0.00 |
| 35.71 | 149.49 | 30.00 | -12.38 | 0.00 | 0.00 | 0.00 |
| 35.81 | 149.91 | 30.42 | -12.55 | 0.00 | 0.00 | 0.00 |
| 35.86 | 150.11 | 30.61 | -12.64 | 0.00 | 0.00 | 0.00 |
| 35.86 | 150.11 | 30.62 | -12.64 | 0.00 | 0.00 | 0.00 |
| 35.87 | 150.16 | 30.67 | -12.66 | 0.00 | 0.00 | 0.00 |
| 36.00 | 150.68 | 31.19 | -12.87 | 0.00 | 0.00 | 0.00 |
| 36.06 | 150.93 | 31.43 | -12.97 | 0.00 | 0.00 | 0.00 |
| 36.07 | 150.99 | 31.50 | -13.00 | 0.00 | 0.00 | 0.00 |
| 36.08 | 151.01 | 31.52 | -13.01 | 0.00 | 0.00 | 0.00 |
| 36.08 | 151.01 | 31.52 | -13.01 | 0.00 | 0.00 | 0.00 |
| 36.08 | 151.02 | 31.53 | -13.01 | 0.00 | 0.00 | 0.00 |
| 36.13 | 151.25 | 31.76 | -13.11 | 0.00 | 0.00 | 0.00 |
| 36.19 | 151.48 | 31.99 | -13.20 | 0.00 | 0.00 | 0.00 |
| 36.19 | 151.50 | 32.00 | -13.21 | 0.00 | 0.00 | 0.00 |
| 36.23 | 151.67 | 32.17 | -13.28 | 0.00 | 0.00 | 0.00 |
| 36.28 | 151.86 | 32.37 | -13.36 | 0.00 | 0.00 | 0.00 |
| 36.28 | 151.88 | 32.39 | -13.37 | 0.00 | 0.00 | 0.00 |
| 36.40 | 152.39 | 32.89 | -13.58 | 0.00 | 0.00 | 0.00 |
| 36.42 | 152.44 | 32.94 | -13.60 | 0.00 | 0.00 | 0.00 |
| 36.42 | 152.46 | 32.96 | -13.61 | 0.00 | 0.00 | 0.00 |
| 36.55 | 152.99 | 33.49 | -13.82 | 0.00 | 0.00 | 0.00 |
| 36.55 | 152.99 | 33.50 | -13.83 | 0.00 | 0.00 | 0.00 |
| 36.80 | 154.03 | 34.53 | -14.25 | 0.00 | 0.00 | 0.00 |
| 36.82 | 154.11 | 34.61 | -14.29 | 0.00 | 0.00 | 0.00 |
| 36.84 | 154.20 | 34.71 | -14.33 | 0.00 | 0.00 | 0.00 |

## SUPPORTING INFORMATION

---

|       |        |       |        |      |      |      |
|-------|--------|-------|--------|------|------|------|
| 36.89 | 154.41 | 34.92 | -14.41 | 0.00 | 0.00 | 0.00 |
| 36.90 | 154.47 | 34.98 | -14.44 | 0.00 | 0.00 | 0.00 |
| 37.01 | 154.93 | 35.44 | -14.63 | 0.00 | 0.00 | 0.00 |
| 37.05 | 155.10 | 35.60 | -14.69 | 0.00 | 0.00 | 0.00 |
| 37.07 | 155.16 | 35.66 | -14.72 | 0.00 | 0.00 | 0.00 |
| 37.22 | 155.79 | 36.30 | -14.98 | 0.00 | 0.00 | 0.00 |
| 37.23 | 155.84 | 36.35 | -15.00 | 0.00 | 0.00 | 0.00 |
| 37.24 | 155.87 | 36.38 | -15.02 | 0.00 | 0.00 | 0.00 |
| 37.26 | 155.96 | 36.46 | -15.05 | 0.00 | 0.00 | 0.00 |
| 37.33 | 156.25 | 36.76 | -15.17 | 0.00 | 0.00 | 0.00 |
| 37.36 | 156.37 | 36.87 | -15.22 | 0.00 | 0.00 | 0.00 |
| 37.39 | 156.49 | 37.00 | -15.27 | 0.00 | 0.00 | 0.00 |
| 37.42 | 156.65 | 37.16 | -15.34 | 0.00 | 0.00 | 0.00 |
| 37.59 | 157.33 | 37.84 | -15.62 | 0.00 | 0.00 | 0.00 |
| 37.60 | 157.39 | 37.90 | -15.64 | 0.00 | 0.00 | 0.00 |
| 37.66 | 157.64 | 38.14 | -15.74 | 0.00 | 0.00 | 0.00 |
| 37.86 | 158.48 | 38.99 | -16.09 | 0.00 | 0.00 | 0.00 |
| 37.86 | 158.49 | 39.00 | -16.10 | 0.00 | 0.00 | 0.00 |
| 37.90 | 158.65 | 39.16 | -16.16 | 0.00 | 0.00 | 0.00 |
| 37.97 | 158.93 | 39.44 | -16.28 | 0.00 | 0.00 | 0.00 |
| 37.97 | 158.96 | 39.47 | -16.29 | 0.00 | 0.00 | 0.00 |
| 38.01 | 159.12 | 39.63 | -16.36 | 0.00 | 0.00 | 0.00 |
| 38.05 | 159.29 | 39.80 | -16.43 | 0.00 | 0.00 | 0.00 |
| 38.06 | 159.30 | 39.80 | -16.43 | 0.00 | 0.00 | 0.00 |
| 38.07 | 159.34 | 39.85 | -16.45 | 0.00 | 0.00 | 0.00 |
| 38.09 | 159.43 | 39.93 | -16.48 | 0.00 | 0.00 | 0.00 |
| 38.09 | 159.46 | 39.96 | -16.50 | 0.00 | 0.00 | 0.00 |
| 38.25 | 160.11 | 40.62 | -16.76 | 0.00 | 0.00 | 0.00 |
| 38.34 | 160.50 | 41.01 | -16.93 | 0.00 | 0.00 | 0.00 |
| 38.41 | 160.76 | 41.27 | -17.03 | 0.00 | 0.00 | 0.00 |
| 38.46 | 160.98 | 41.48 | -17.12 | 0.00 | 0.00 | 0.00 |
| 38.50 | 161.15 | 41.65 | -17.19 | 0.00 | 0.00 | 0.00 |
| 38.52 | 161.24 | 41.75 | -17.23 | 0.00 | 0.00 | 0.00 |
| 38.66 | 161.84 | 42.35 | -17.48 | 0.00 | 0.00 | 0.00 |
| 38.74 | 162.15 | 42.66 | -17.61 | 0.00 | 0.00 | 0.00 |
| 38.76 | 162.27 | 42.77 | -17.65 | 0.00 | 0.00 | 0.00 |
| 38.94 | 162.99 | 43.49 | -17.95 | 0.00 | 0.00 | 0.00 |
| 39.10 | 163.67 | 44.18 | -18.24 | 0.00 | 0.00 | 0.00 |
| 39.41 | 164.97 | 45.47 | -18.77 | 0.00 | 0.00 | 0.00 |
| 39.48 | 165.28 | 45.79 | -18.90 | 0.00 | 0.00 | 0.00 |
| 39.49 | 165.30 | 45.81 | -18.91 | 0.00 | 0.00 | 0.00 |
| 39.50 | 165.35 | 45.86 | -18.93 | 0.00 | 0.00 | 0.00 |
| 39.56 | 165.59 | 46.10 | -19.03 | 0.00 | 0.00 | 0.00 |
| 39.59 | 165.72 | 46.23 | -19.08 | 0.00 | 0.00 | 0.00 |



## SUPPORTING INFORMATION

|       |        |       |        |      |      |      |
|-------|--------|-------|--------|------|------|------|
| 39.64 | 165.93 | 46.44 | -19.17 | 0.00 | 0.00 | 0.00 |
| 39.64 | 165.94 | 46.44 | -19.17 | 0.00 | 0.00 | 0.00 |
| 39.76 | 166.43 | 46.94 | -19.37 | 0.00 | 0.00 | 0.00 |
| 39.81 | 166.65 | 47.16 | -19.47 | 0.00 | 0.00 | 0.00 |
| 39.85 | 166.82 | 47.32 | -19.53 | 0.00 | 0.00 | 0.00 |
| 39.91 | 167.08 | 47.58 | -19.64 | 0.00 | 0.00 | 0.00 |
| 39.98 | 167.35 | 47.85 | -19.75 | 0.00 | 0.00 | 0.00 |
| 40.11 | 167.89 | 48.39 | -19.98 | 0.00 | 0.00 | 0.00 |
| 40.16 | 168.09 | 48.60 | -20.06 | 0.00 | 0.00 | 0.00 |
| 40.24 | 168.46 | 48.97 | -20.21 | 0.00 | 0.00 | 0.00 |
| 40.29 | 168.67 | 49.18 | -20.30 | 0.00 | 0.00 | 0.00 |
| 40.45 | 169.32 | 49.83 | -20.57 | 0.00 | 0.00 | 0.00 |
| 40.47 | 169.40 | 49.91 | -20.60 | 0.00 | 0.00 | 0.00 |
| 40.49 | 169.47 | 49.98 | -20.63 | 0.00 | 0.00 | 0.00 |
| 40.63 | 170.06 | 50.57 | -20.87 | 0.00 | 0.00 | 0.00 |
| 40.96 | 171.44 | 51.94 | -21.44 | 0.00 | 0.00 | 0.00 |
| 41.26 | 172.70 | 53.20 | -21.96 | 0.00 | 0.00 | 0.00 |
| 41.39 | 173.24 | 53.74 | -22.18 | 0.00 | 0.00 | 0.00 |
| 41.45 | 173.52 | 54.02 | -22.30 | 0.00 | 0.00 | 0.00 |
| 41.52 | 173.79 | 54.30 | -22.41 | 0.00 | 0.00 | 0.00 |
| 41.54 | 173.89 | 54.40 | -22.45 | 0.00 | 0.00 | 0.00 |
| 41.58 | 174.03 | 54.54 | -22.51 | 0.00 | 0.00 | 0.00 |
| 41.69 | 174.51 | 55.02 | -22.71 | 0.00 | 0.00 | 0.00 |
| 41.73 | 174.68 | 55.19 | -22.78 | 0.00 | 0.00 | 0.00 |
| 41.91 | 175.44 | 55.94 | -23.09 | 0.00 | 0.00 | 0.00 |
| 41.98 | 175.71 | 56.21 | -23.20 | 0.00 | 0.00 | 0.00 |
| 41.99 | 175.77 | 56.28 | -23.23 | 0.00 | 0.00 | 0.00 |
| 42.35 | 177.29 | 57.79 | -23.85 | 0.00 | 0.00 | 0.00 |
| 42.69 | 178.68 | 59.19 | -24.43 | 0.00 | 0.00 | 0.00 |
| 42.77 | 179.03 | 59.53 | -24.57 | 0.00 | 0.00 | 0.00 |
| 42.93 | 179.71 | 60.22 | -24.85 | 0.00 | 0.00 | 0.00 |
| 43.23 | 180.95 | 61.46 | -25.37 | 0.00 | 0.00 | 0.00 |
| 43.31 | 181.28 | 61.79 | -25.50 | 0.00 | 0.00 | 0.00 |
| 43.39 | 181.63 | 62.13 | -25.65 | 0.00 | 0.00 | 0.00 |
| 43.40 | 181.66 | 62.16 | -25.66 | 0.00 | 0.00 | 0.00 |
| 44.01 | 184.22 | 64.72 | -26.72 | 0.00 | 0.00 | 0.00 |
| 44.19 | 184.96 | 65.47 | -27.02 | 0.00 | 0.00 | 0.00 |
| 44.40 | 185.86 | 66.36 | -27.39 | 0.00 | 0.00 | 0.00 |
| 44.52 | 186.35 | 66.85 | -27.59 | 0.00 | 0.00 | 0.00 |
| 45.08 | 188.68 | 69.19 | -28.56 | 0.00 | 0.00 | 0.00 |
| 45.80 | 191.71 | 72.22 | -29.81 | 0.00 | 0.00 | 0.00 |
| 45.90 | 192.14 | 72.64 | -29.98 | 0.00 | 0.00 | 0.00 |
| 46.20 | 193.38 | 73.89 | -30.50 | 0.00 | 0.00 | 0.00 |
| 48.47 | 202.89 | 83.40 | -34.42 | 0.00 | 0.00 | 0.00 |

## SUPPORTING INFORMATION

---

49.92      208.97      89.47      -36.93      0.00      0.00      0.00

**Table S4:** Maxwell-Boltzmann distribution calculated at 300 K for  $\alpha$  anomer of unlabeled **11**.

| Minimized<br>Energy<br>(Kcal/mol) | Minimized<br>Energy<br>(KJ/mol) | $\Delta$ energy ( $\Delta E$ )<br>(KJ/mol) | $-\Delta E/RT$ | $e^{-E/RT}$ | fraction | % population |
|-----------------------------------|---------------------------------|--------------------------------------------|----------------|-------------|----------|--------------|
| 20.08                             | 84.04                           | 0.00                                       | 0.00           | 1.00        | 0.73     | 72.90        |
| 21.17                             | 88.61                           | 4.57                                       | -1.89          | 0.15        | 0.11     | 11.07        |
| 21.36                             | 89.43                           | 5.39                                       | -2.22          | 0.11        | 0.08     | 7.89         |
| 21.42                             | 89.68                           | 5.63                                       | -2.33          | 0.10        | 0.07     | 7.12         |
| 22.91                             | 95.91                           | 11.86                                      | -4.90          | 0.01        | 0.01     | 0.54         |
| 23.48                             | 98.30                           | 14.25                                      | -5.88          | 0.00        | 0.00     | 0.20         |
| 23.60                             | 98.79                           | 14.75                                      | -6.09          | 0.00        | 0.00     | 0.17         |
| 23.98                             | 100.39                          | 16.35                                      | -6.75          | 0.00        | 0.00     | 0.09         |
| 25.34                             | 106.09                          | 22.04                                      | -9.10          | 0.00        | 0.00     | 0.01         |
| 25.57                             | 107.03                          | 22.99                                      | -9.49          | 0.00        | 0.00     | 0.01         |
| 26.01                             | 108.87                          | 24.82                                      | -10.25         | 0.00        | 0.00     | 0.00         |
| 26.02                             | 108.90                          | 24.86                                      | -10.26         | 0.00        | 0.00     | 0.00         |
| 26.07                             | 109.11                          | 25.07                                      | -10.35         | 0.00        | 0.00     | 0.00         |
| 26.12                             | 109.33                          | 25.28                                      | -10.44         | 0.00        | 0.00     | 0.00         |
| 26.16                             | 109.50                          | 25.46                                      | -10.51         | 0.00        | 0.00     | 0.00         |
| 26.72                             | 111.85                          | 27.80                                      | -11.48         | 0.00        | 0.00     | 0.00         |
| 28.54                             | 119.45                          | 35.41                                      | -14.62         | 0.00        | 0.00     | 0.00         |
| 29.03                             | 121.50                          | 37.46                                      | -15.46         | 0.00        | 0.00     | 0.00         |
| 29.05                             | 121.59                          | 37.54                                      | -15.50         | 0.00        | 0.00     | 0.00         |
| 29.15                             | 122.02                          | 37.98                                      | -15.67         | 0.00        | 0.00     | 0.00         |
| 29.55                             | 123.70                          | 39.66                                      | -16.37         | 0.00        | 0.00     | 0.00         |
| 29.92                             | 125.25                          | 41.21                                      | -17.01         | 0.00        | 0.00     | 0.00         |
| 30.54                             | 127.82                          | 43.78                                      | -18.07         | 0.00        | 0.00     | 0.00         |
| 30.62                             | 128.18                          | 44.13                                      | -18.22         | 0.00        | 0.00     | 0.00         |
| 31.74                             | 132.86                          | 48.81                                      | -20.15         | 0.00        | 0.00     | 0.00         |
| 34.24                             | 143.31                          | 59.27                                      | -24.46         | 0.00        | 0.00     | 0.00         |
| 35.65                             | 149.21                          | 65.17                                      | -26.90         | 0.00        | 0.00     | 0.00         |

## SUPPORTING INFORMATION

**Table S5:** Maxwell-Boltzmann distribution calculated at 300 K for  $\beta$  anomer of unlabeled **11**.

| Minimized Energy (Kcal/mol) | Minimized Energy (KJ/mol) | $\Delta$ energy ( $\Delta E$ ) (KJ/mol) | $-\Delta E/RT$ | $e^{-E/RT}$ | fraction | % population |
|-----------------------------|---------------------------|-----------------------------------------|----------------|-------------|----------|--------------|
| Kcal/mol                    | KJ/mol                    | $\Delta$ energy ( $\Delta E$ )          | $-\Delta E/RT$ | $e^{-E/RT}$ | fraction | % population |
| 18.96                       | 79.35                     | 0.00                                    | 0.00           | 1.00        | 0.73     | 72.94        |
| 20.05                       | 83.94                     | 4.59                                    | -1.90          | 0.15        | 0.11     | 10.96        |
| 20.30                       | 84.97                     | 5.63                                    | -2.32          | 0.10        | 0.07     | 7.15         |
| 20.36                       | 85.21                     | 5.86                                    | -2.42          | 0.09        | 0.06     | 6.49         |
| 21.20                       | 88.73                     | 9.39                                    | -3.88          | 0.02        | 0.02     | 1.51         |
| 21.86                       | 91.49                     | 12.14                                   | -5.01          | 0.01        | 0.00     | 0.49         |
| 22.24                       | 93.11                     | 13.76                                   | -5.68          | 0.00        | 0.00     | 0.25         |
| 22.48                       | 94.09                     | 14.75                                   | -6.09          | 0.00        | 0.00     | 0.17         |
| 24.01                       | 100.51                    | 21.16                                   | -8.74          | 0.00        | 0.00     | 0.01         |
| 24.02                       | 100.54                    | 21.19                                   | -8.75          | 0.00        | 0.00     | 0.01         |
| 24.49                       | 102.53                    | 23.19                                   | -9.57          | 0.00        | 0.00     | 0.01         |
| 24.51                       | 102.61                    | 23.26                                   | -9.60          | 0.00        | 0.00     | 0.00         |
| 24.73                       | 103.53                    | 24.18                                   | -9.98          | 0.00        | 0.00     | 0.00         |
| 24.74                       | 103.57                    | 24.23                                   | -10.00         | 0.00        | 0.00     | 0.00         |
| 24.78                       | 103.71                    | 24.36                                   | -10.06         | 0.00        | 0.00     | 0.00         |
| 25.06                       | 104.89                    | 25.54                                   | -10.54         | 0.00        | 0.00     | 0.00         |
| 26.23                       | 109.79                    | 30.44                                   | -12.56         | 0.00        | 0.00     | 0.00         |
| 27.26                       | 114.10                    | 34.76                                   | -14.35         | 0.00        | 0.00     | 0.00         |
| 27.55                       | 115.34                    | 35.99                                   | -14.86         | 0.00        | 0.00     | 0.00         |
| 27.88                       | 116.69                    | 37.34                                   | -15.41         | 0.00        | 0.00     | 0.00         |
| 28.13                       | 117.73                    | 38.39                                   | -15.84         | 0.00        | 0.00     | 0.00         |
| 28.95                       | 121.17                    | 41.83                                   | -17.26         | 0.00        | 0.00     | 0.00         |
| 29.09                       | 121.75                    | 42.41                                   | -17.50         | 0.00        | 0.00     | 0.00         |
| 30.54                       | 127.83                    | 48.49                                   | -20.01         | 0.00        | 0.00     | 0.00         |
| 31.16                       | 130.44                    | 51.10                                   | -21.09         | 0.00        | 0.00     | 0.00         |
| 33.23                       | 139.09                    | 59.74                                   | -24.66         | 0.00        | 0.00     | 0.00         |
| 34.40                       | 143.98                    | 64.63                                   | -26.68         | 0.00        | 0.00     | 0.00         |

**Molecular dynamics (MD) simulations on unlabeled glycans 10 and 11 in vacuum**

## SUPPORTING INFORMATION

---

5  $\mu$ s MD simulations were performed *in vacuo* on the 14 and the 8 most abundant conformers, involving both anomers for unlabeled compounds **10** and **11**, respectively. These simulations were carried out with the AMBER 18 package.<sup>[4]</sup> Parameters for the oligosaccharides were generated with the *antechamber* module of AMBER, using GAFF2<sup>[5]</sup> force field. The partial charges on each atom were generated following a standard protocol. First, HF/6-31G(d) was used to calculate the molecular electrostatic potential (MEP). Secondly, the RESP<sup>[6]</sup> (Restrained ElectroStatic Potential) algorithm fits this MEP by using an atom-centered point charge model. The charges were calculated according to the Merz-Singh-Kollman scheme using Gaussian 16.<sup>[7]</sup> Each molecule was minimized in *vacuo* (500 steps) with a cut-off set to 999 Å for the non-bonded interactions and in the absence of neutralizing ions to better reproduce the ion mobility measurements. The system was subjected then to 5  $\mu$ s MD simulations in vacuum at a constant temperature of 300K. A weak-coupling algorithm was used to control and equalize the temperature.<sup>[8]</sup> The time step was kept at 1 fs. Hydrogen atoms were kept fixed through the simulations using the SHAKE algorithm<sup>[9]</sup> and a cut-off of 999 Å was applied. For each molecule, the trajectory was saved every 10,000 steps, with a total of 5,000,000,000 steps per simulation. The *cpptraj* module of AMBER 18 was employed to extract 10,000 frames from each MD trajectory.

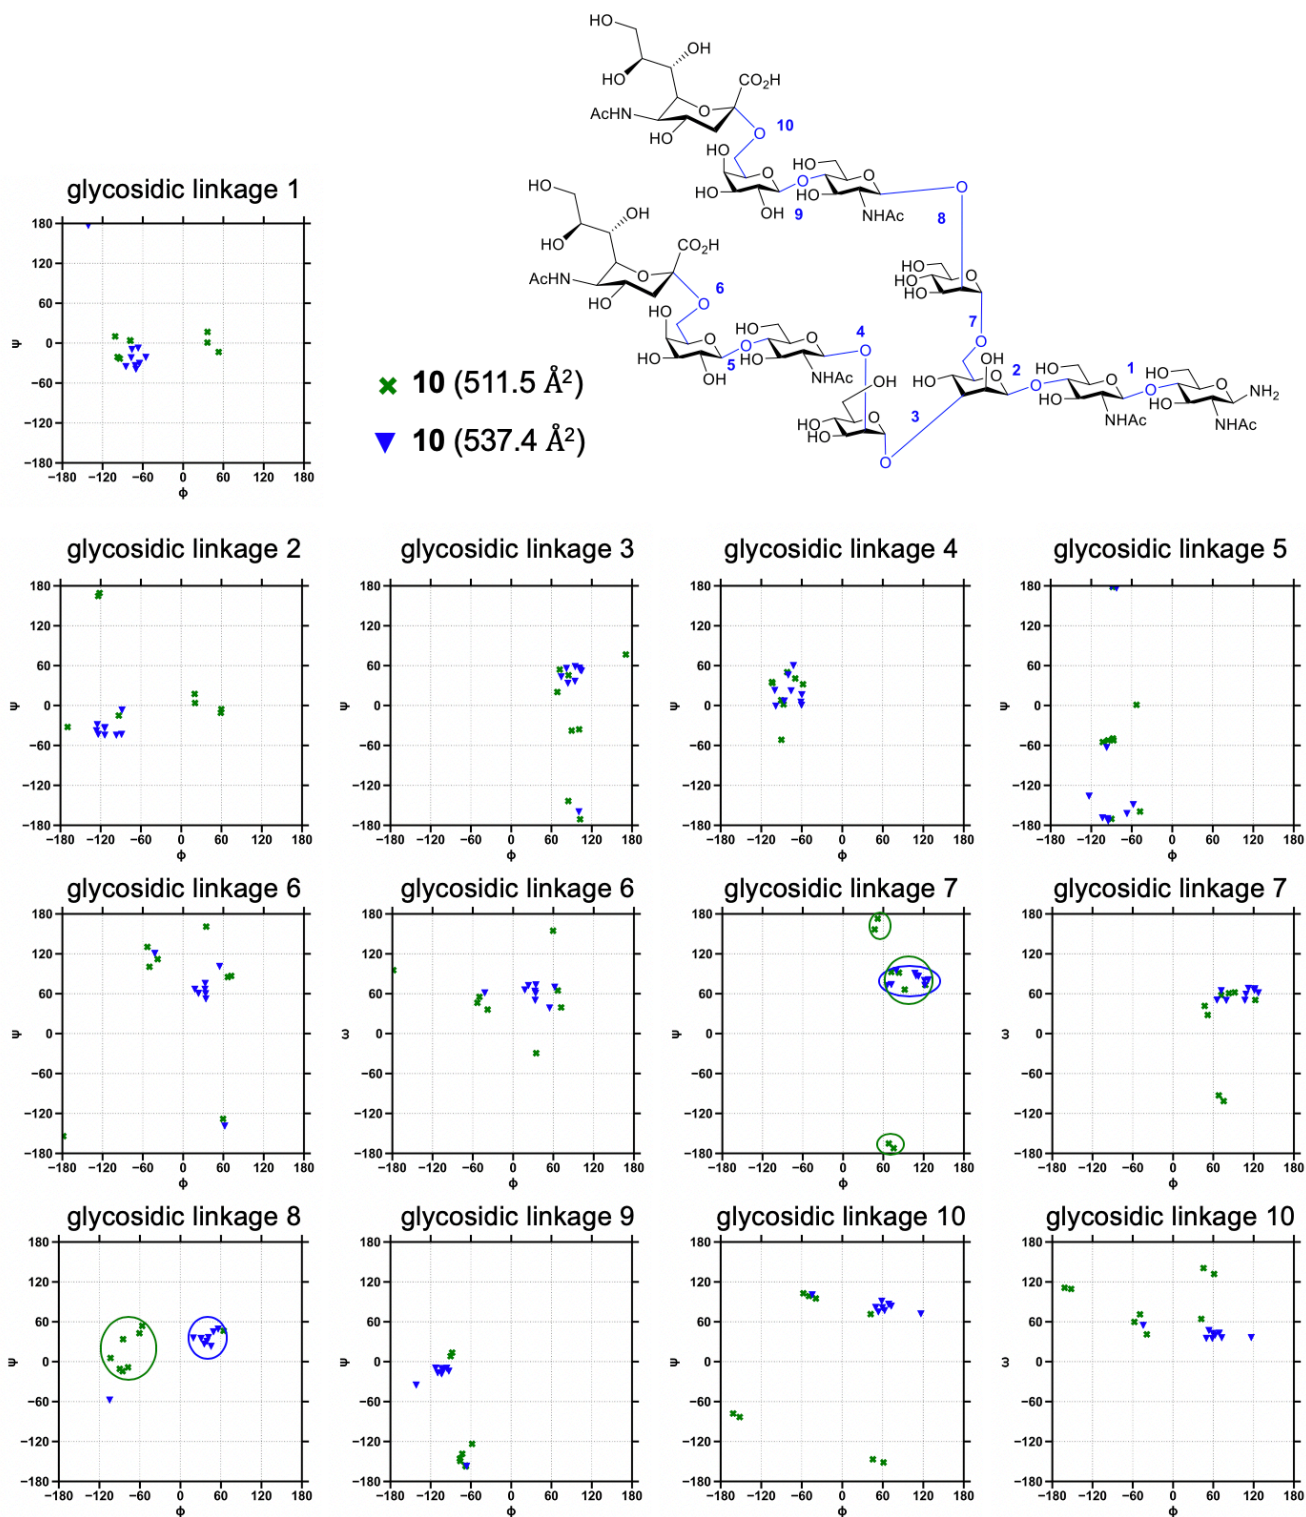

**Figure S121.**  $\phi$ ,  $\psi$  and  $\omega$  dihedral values for all the glycosidic linkages of glycan **10**. Green crosses and blue triangles correspond to the peaks with CCS values of 511.5 Å<sup>2</sup> and 537.4 Å<sup>2</sup>, respectively. Glycosidic linkage Man $\alpha$ (1,6)Man (glycosidic bond 7) and GlcNAc $\beta$ (1,2)Man (glycosidic bond 8) determine the difference between the conformational distributions, as highlighted in the pictures.

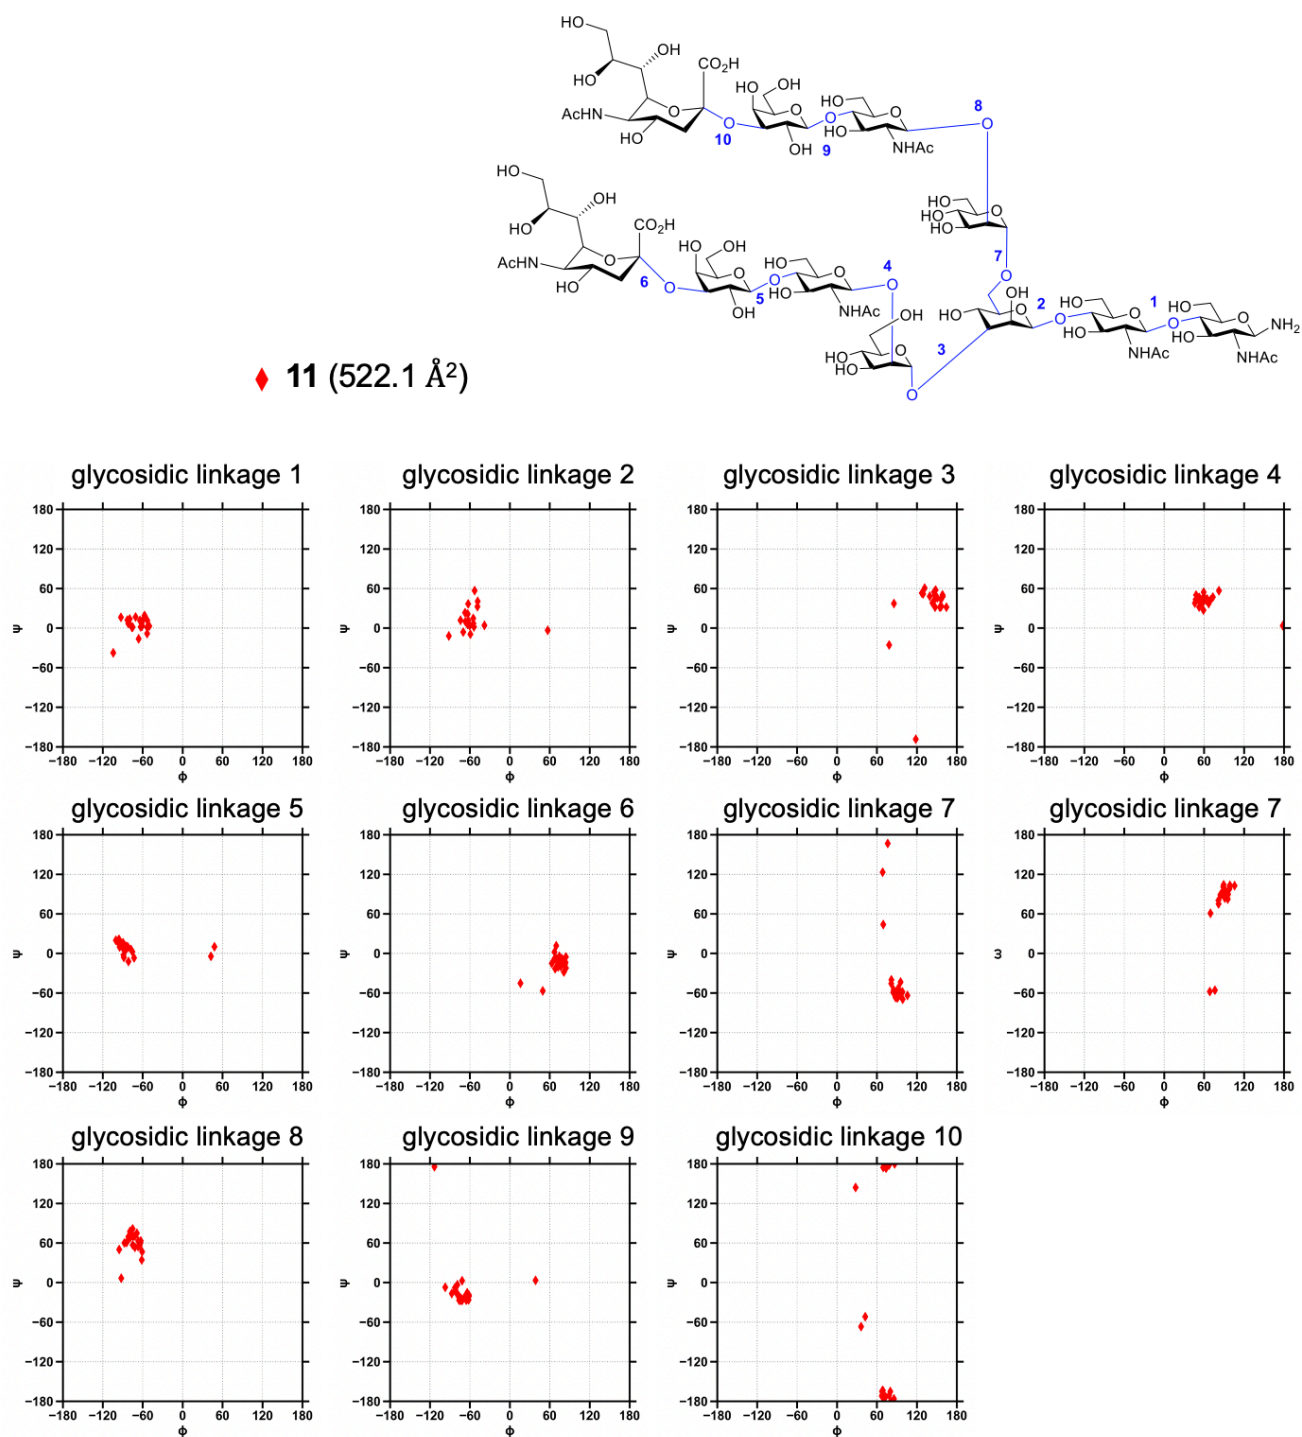

**Figure S122.**  $\phi$ ,  $\psi$  and  $\omega$  dihedral values for all the glycosidic linkages of glycan 11. The different conformers found for glycan 11 MD simulations in vacuum show higher rigidity, with torsional angles values less disperse, as represented in the figures.

## CCS value calculation of each frame

High Performance Collision Cross Section (HPCCS)<sup>[10]</sup> software was used to estimate the CCS value of each frame using 50 points of integrations for Monte Carlo at 300 K under nitrogen gas. CCS values of each conformer were normalized based on their theoretical abundancy and represented to give the theoretical ATDs of the standards **10'** and **11'**.

## References

- [1] L. Liu, A. R. Prudden, G. P. Bosman, G. J. Boons, *Carbohydr. Res.* **2017**, DOI 10.1016/j.carres.2017.10.001.
- [2] D. H. Joziase, W. E. Schiphorst, D. H. Van den Eijnden, J. A. Van Kuik, H. Van Halbeek, J. F. Vliegthart, *J. Biol. Chem.* **1987**, *262*, 2025–33.
- [3] D. H. van den Eijnden, W. M. Blanken, A. van Vliet, *Carbohydr. Res.* **1986**, *151*, 329–335.
- [4] D.A. Case, S.R. Brozell, D.S. Cerutti, T.E. Cheatham, III, V.W.D. Cruzeiro, T.A. Darden, R.E. Duke, D. Ghoreishi, H. Gohlke, A.W. Goetz, D. Greene, R Harris, N. Homeyer, S. Izadi, A. Kovalenko, T.S. Lee, S. LeGrand, P. Li, C. Lin, J. Liu, T. Luchko, R. Luo, D.J. Mermelstein, K.M. Merz, Y. Miao, G. Monard, H. Nguyen, I. Omelyan, A. Onufriev, F. Pan, R. Qi, D.R. Roe, A. Roitberg, C. Sagui, S. Schott-Verdugo, J. Shen, C.L. Simmerling, J. Smith, J. Swails, R.C. Walker, J. Wang, H. Wei, R.M. Wolf, X. Wu, L. Xiao, D.M. York and P.A. Kollman, AMBER 2018, *Univ. California, San Fr.* **2018**.
- [5] J. Wang, R. M. Wolf, J. W. Caldwell, P. A. Kollman, D. A. Case, *J. Comput. Chem.* **2004**, *25*, 1157–1174.
- [6] C. I. Bayly, P. Cieplak, W. Cornell, P. A. Kollman, *J. Phys. Chem.* **1993**, *97*, 10269–10280.
- [7] Gaussian 16, Revision C.01, M. J. Frisch, G. W. Trucks, H. B. Schlegel, G. E. Scuseria, M. A. Robb, J. R. Cheeseman, G. Scalmani, V. Barone, G. A. Petersson, H. Nakatsuji, X. Li, M. Caricato, A. V. Marenich, J. Bloino, B. G. Janesko, R. Gomperts, B. Mennucci, H. P. Hratchian, J. V. Ortiz, A. F. Izmaylov, J. L. Sonnenberg, D. Williams-Young, F. Ding, F. Lipparini, F. Egidi, J. Goings, B. Peng, A. Petrone, T. Henderson, D. Ranasinghe, V. G. Zakrzewski, J. Gao, N. Rega, G. Zheng, W. Liang, M. Hada, M. Ehara, K. Toyota, R. Fukuda, J. Hasegawa, M. Ishida, T. Nakajima, Y. Honda, O. Kitao, H. Nakai, T. Vreven, K. Throssell, J. A. Montgomery, Jr., J. E. Peralta, F. Ogliaro, M. J. Bearpark, J. J. Heyd, E. N. Brothers, K. N. Kudin, V. N. Staroverov, T. A. Keith, R. Kobayashi, J. Normand, K. Raghavachari, A. P. Rendell, J. C. Burant, S. S. Iyengar, J. Tomasi, M. Cossi, J. M. Millam, M. Klene, C. Adamo, R. Cammi, J. W. Ochterski, R. L. Martin, K. Morokuma, O. Farkas, J. B. Foresman, and D. J. Fox, *Gaussian, Inc., Wallingford CT*, **2016**.
- [8] H. J. C. Berendsen, J. P. M. Postma, W. F. van Gunsteren, A. DiNola, J. R. Haak, *J. Chem. Phys.* **1984**, *81*, 3684–3690.
- [9] S. Miyamoto, P. A. Kollman, *J. Comput. Chem.* **1992**, *13*, 952–962.
- [10] L. Zanutto, G. Heerdt, P. C. T. Souza, G. Araujo, M. S. Skaf, *J. Comput. Chem.* **2018**, *39*, 1675–1681.

## Author Contributions

O.A.-O., J.S.T. and V.J.S conceived the experiments. N.W, T.L. and G.J.B. designed and synthesized the standards. O.A.-O., J.S.T., V.J.S, F.C. and G.J.O. carried out the experiments. J.S.T., V.J.S., O.A.-O, J.M.F-P,L.U and G.J.B. took the lead in writing the manuscript and designing the figures. All authors provided critical feedback and worked on the manuscript.
